# Supplementary material for: Gene co-expression network connectivity is an important determinant of selective constraint
Source: PubMed Central journal article supplement (PMC5407845; doi:10.1371/journal.pgen.1006402), 2017-04-13
Supplement: pgen.1006402.s008.pdf [file pgen.1006402.s008.pdf]

Number of eQTLs (5% BH FDR)

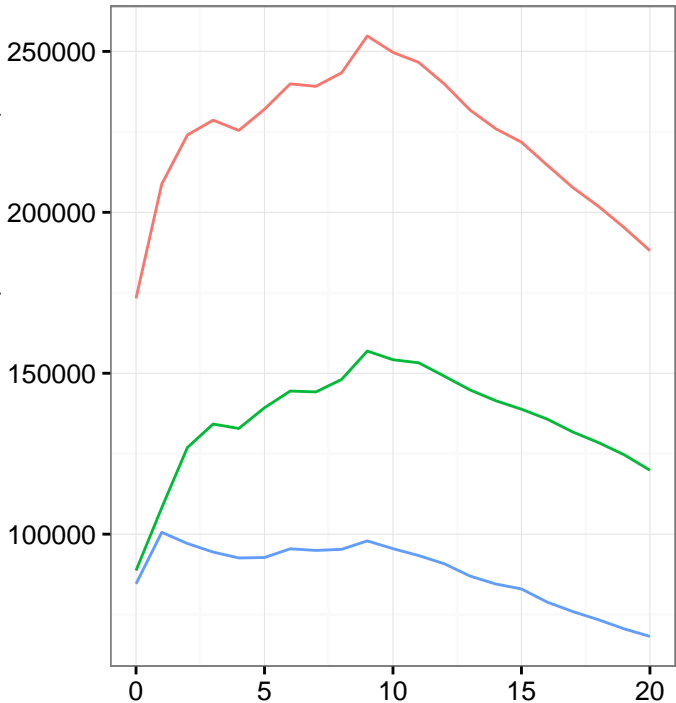

eQTL type

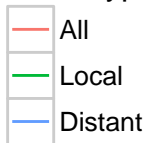

Number of expression components removed
