# Supplementary material for: Gene co-expression network connectivity is an important determinant of selective constraint
Source: PubMed Central journal article supplement (PMC5407845; doi:10.1371/journal.pgen.1006402), 2017-04-13

**A**

Local eSNP in eGene

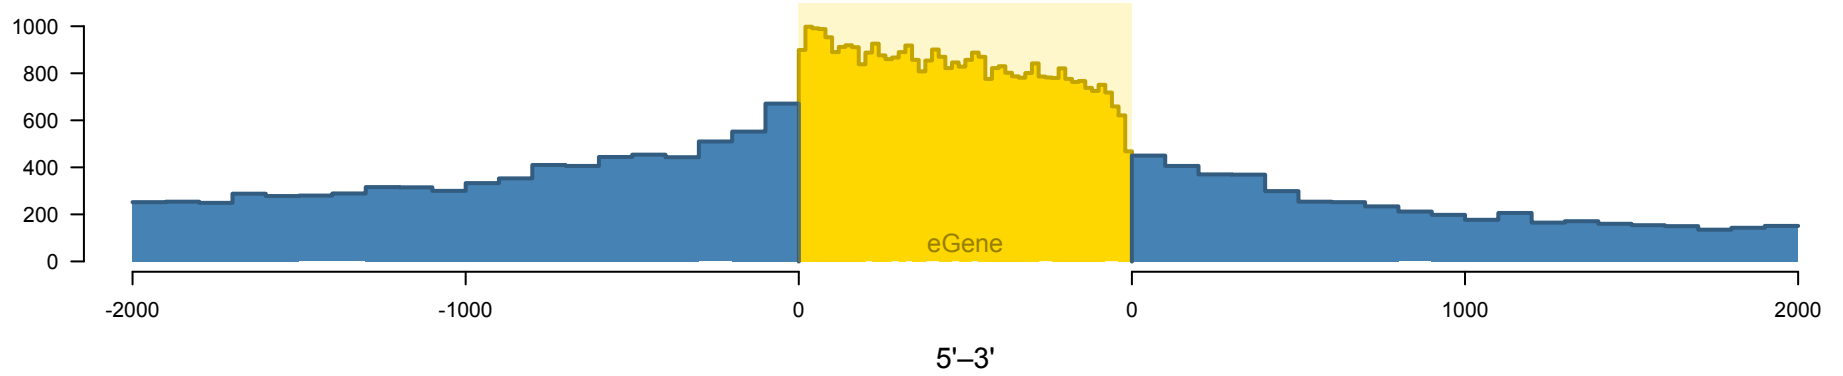**B**

Local eSNP in first neighbour

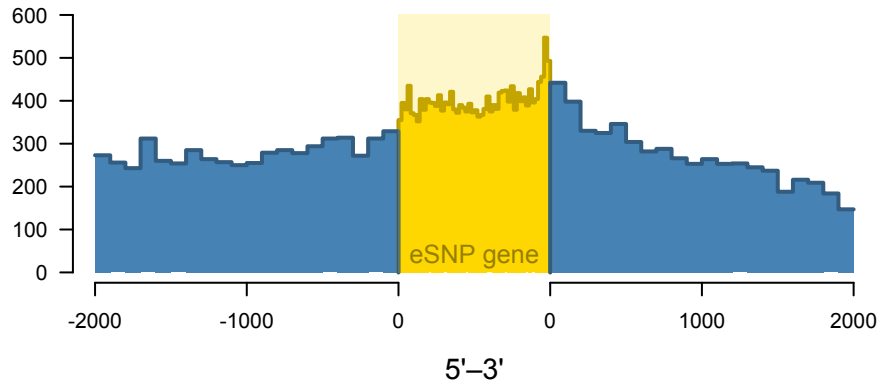**C**

Local eSNP in first neighbour

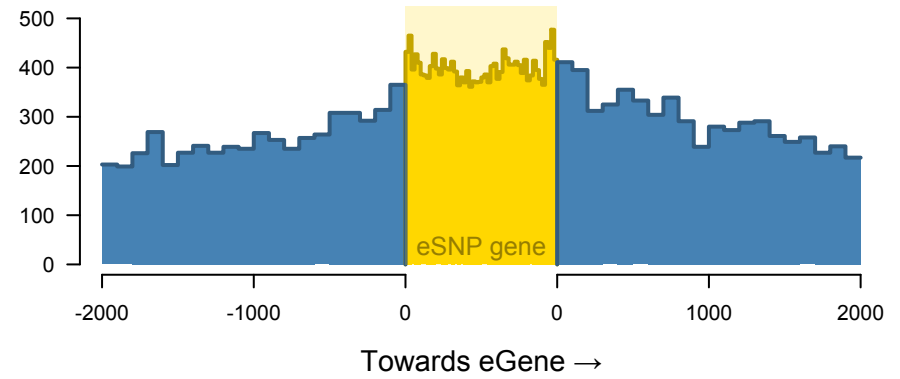**D**

Local eSNP in other neighbours

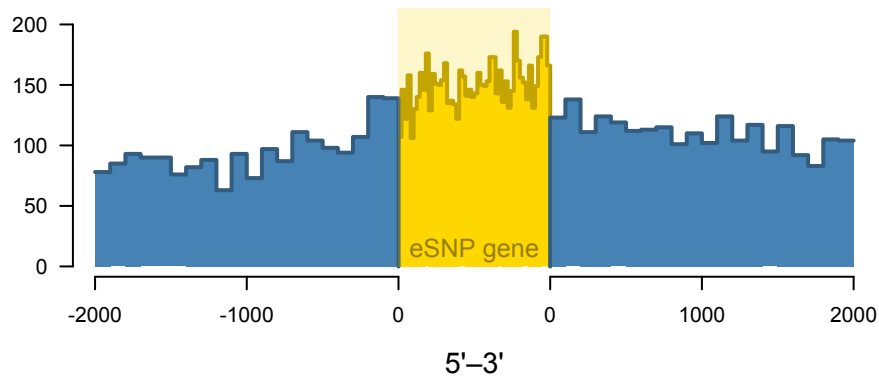**E**

Local eSNP in other neighbours

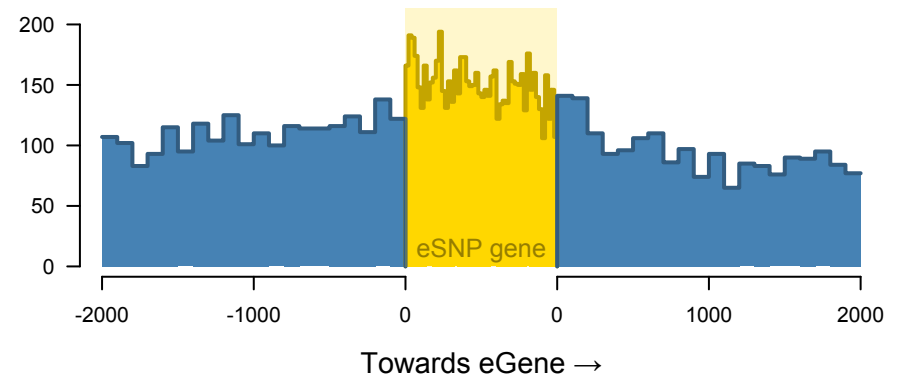

Supplement: pgen.1006402.s013.pdf [file pgen.1006402.s013.pdf]
