# Supplementary material for: Gene co-expression network connectivity is an important determinant of selective constraint
Source: PubMed Central journal article supplement (PMC5407845; doi:10.1371/journal.pgen.1006402), 2017-04-13

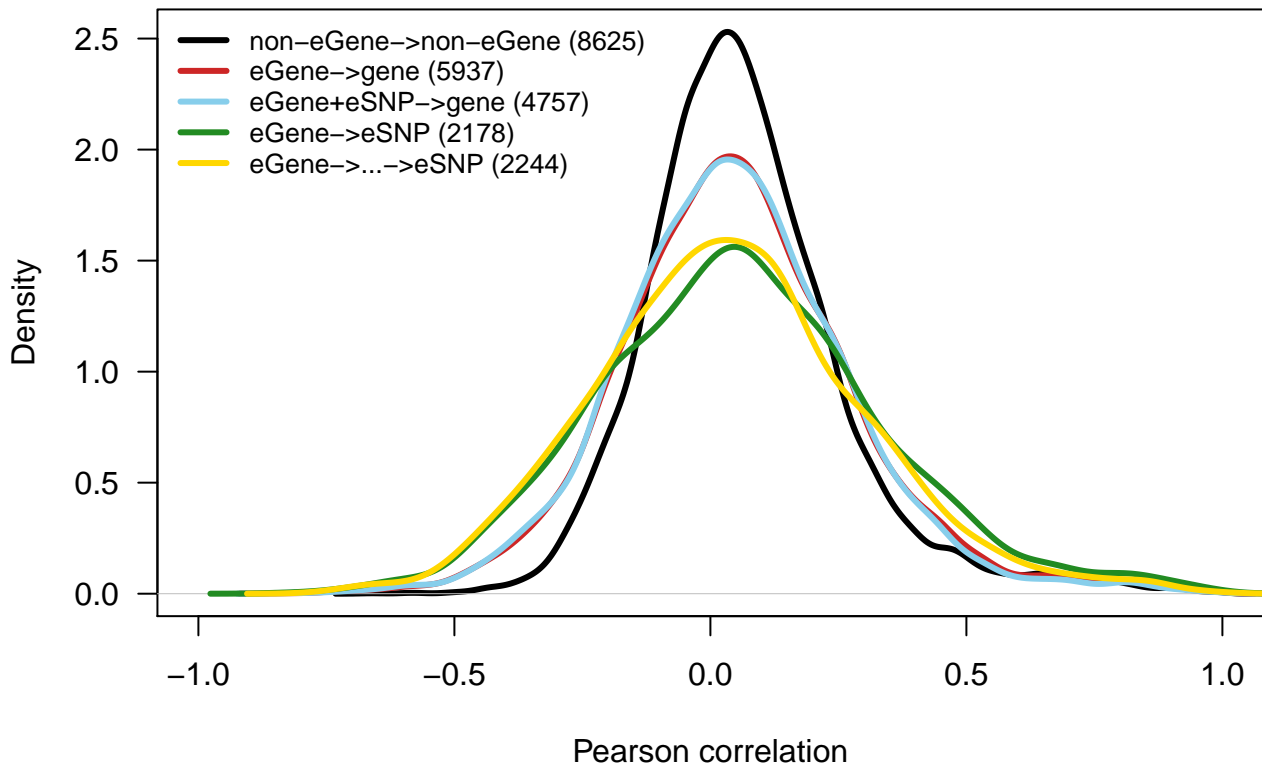

Supplement: pgen.1006402.s014.pdf [file pgen.1006402.s014.pdf]
