# Supplementary material for: Gene co-expression network connectivity is an important determinant of selective constraint
Source: PLoS Genet. 2017 Apr 13;13(4):e1006402. doi: 10.1371/journal.pgen.1006402 (PMC5407845; doi:10.1371/journal.pgen.1006402)
Supplement: S1 File — Contains GO enrichment results for local and distant eGenes, network module cores, and subsets of genes with extreme H2 and QST values. (XLSX) [file pgen.1006402.s001.xlsx]

## Sheet: Module GO enrichment
mod	GO.ID	Term	Annotated	Significant	Expected	p.value
0	GO:0006468	protein phosphorylation	949	86	62.26	0.00092
0	GO:0016310	phosphorylation	1047	92	68.69	0.00161
0	GO:0006793	phosphorus metabolic process	1332	112	87.39	0.00226
0	GO:0006535	cysteine biosynthetic process from serin...	10	4	0.66	0.0028
0	GO:0006796	phosphate-containing compound metabolic ...	1330	111	87.26	0.00305
0	GO:0006534	cysteine metabolic process	11	4	0.72	0.00417
0	GO:0019344	cysteine biosynthetic process	11	4	0.72	0.00417
0	GO:0044699	single-organism process	3618	266	237.37	0.0057
0	GO:0006612	protein targeting to membrane	12	4	0.79	0.00593
0	GO:0006613	cotranslational protein targeting to mem...	12	4	0.79	0.00593
0	GO:0006614	SRP-dependent cotranslational protein ta...	12	4	0.79	0.00593
0	GO:0045047	protein targeting to ER	12	4	0.79	0.00593
0	GO:0072599	establishment of protein localization to...	12	4	0.79	0.00593
0	GO:0044763	single-organism cellular process	2362	181	154.97	0.00638
0	GO:0043412	macromolecule modification	1252	103	82.14	0.00681
0	GO:0051188	cofactor biosynthetic process	73	11	4.79	0.00759
0	GO:0008037	cell recognition	74	11	4.85	0.0084
0	GO:0009856	pollination	74	11	4.85	0.0084
0	GO:0009875	pollen-pistil interaction	74	11	4.85	0.0084
0	GO:0044706	multi-multicellular organism process	74	11	4.85	0.0084
0	GO:0048544	recognition of pollen	74	11	4.85	0.0084
0	GO:0032501	multicellular organismal process	87	12	5.71	0.01091
0	GO:0044272	sulfur compound biosynthetic process	48	8	3.15	0.01197
0	GO:0006464	cellular protein modification process	1207	98	79.19	0.012
0	GO:0036211	protein modification process	1207	98	79.19	0.012
0	GO:0006281	DNA repair	89	12	5.84	0.01297
0	GO:0044703	multi-organism reproductive process	79	11	5.18	0.01353
0	GO:0006974	cellular response to DNA damage stimulus	90	12	5.9	0.01411
0	GO:0007154	cell communication	429	40	28.15	0.01448
0	GO:0051716	cellular response to stimulus	445	41	29.2	0.01612
0	GO:0022414	reproductive process	81	11	5.31	0.01615
0	GO:0051704	multi-organism process	82	11	5.38	0.01759
0	GO:0033554	cellular response to stress	94	12	6.17	0.01943
0	GO:0006869	lipid transport	43	7	2.82	0.02061
0	GO:0010876	lipid localization	43	7	2.82	0.02061
0	GO:0070972	protein localization to endoplasmic reti...	17	4	1.12	0.02197
0	GO:0006790	sulfur compound metabolic process	65	9	4.26	0.02511
0	GO:1901607	alpha-amino acid biosynthetic process	100	12	6.56	0.03003
0	GO:0042559	pteridine-containing compound biosynthet...	11	3	0.72	0.03118
0	GO:0009966	regulation of signal transduction	48	7	3.15	0.03561
0	GO:0010646	regulation of cell communication	48	7	3.15	0.03561
0	GO:0023051	regulation of signaling	48	7	3.15	0.03561
0	GO:0009070	serine family amino acid biosynthetic pr...	20	4	1.31	0.03831
0	GO:0044711	single-organism biosynthetic process	527	45	34.58	0.03915
0	GO:0006760	folic acid-containing compound metabolic...	12	3	0.79	0.03959
0	GO:0061024	membrane organization	30	5	1.97	0.04351
0	GO:0006779	porphyrin-containing compound biosynthet...	21	4	1.38	0.04495
0	GO:0042398	cellular modified amino acid biosyntheti...	21	4	1.38	0.04495
0	GO:0072594	establishment of protein localization to...	21	4	1.38	0.04495
0	GO:0009108	coenzyme biosynthetic process	51	7	3.35	0.04739
0	GO:0015914	phospholipid transport	13	3	0.85	0.04903
0	GO:0007010	cytoskeleton organization	31	5	2.03	0.0492
1	GO:0009072	aromatic amino acid family metabolic pro...	42	10	3.11	0.00078
1	GO:0044710	single-organism metabolic process	2091	179	154.95	0.01203
1	GO:0009152	purine ribonucleotide biosynthetic proce...	53	9	3.93	0.01485
1	GO:0019693	ribose phosphate metabolic process	151	19	11.19	0.01567
1	GO:0030243	cellulose metabolic process	29	6	2.15	0.01766
1	GO:0030244	cellulose biosynthetic process	29	6	2.15	0.01766
1	GO:0009260	ribonucleotide biosynthetic process	56	9	4.15	0.02086
1	GO:0046390	ribose phosphate biosynthetic process	56	9	4.15	0.02086
1	GO:0008202	steroid metabolic process	15	4	1.11	0.0211
1	GO:0006164	purine nucleotide biosynthetic process	57	9	4.22	0.02321
1	GO:0009966	regulation of signal transduction	48	8	3.56	0.0234
1	GO:0010646	regulation of cell communication	48	8	3.56	0.0234
1	GO:0023051	regulation of signaling	48	8	3.56	0.0234
1	GO:0006399	tRNA metabolic process	76	11	5.63	0.02351
1	GO:0006754	ATP biosynthetic process	31	6	2.3	0.02415
1	GO:0009117	nucleotide metabolic process	191	22	14.15	0.02519
1	GO:0051273	beta-glucan metabolic process	40	7	2.96	0.02588
1	GO:0051274	beta-glucan biosynthetic process	40	7	2.96	0.02588
1	GO:0009165	nucleotide biosynthetic process	88	12	6.52	0.02826
1	GO:1901293	nucleoside phosphate biosynthetic proces...	88	12	6.52	0.02826
1	GO:0009150	purine ribonucleotide metabolic process	129	16	9.56	0.02844
1	GO:0042451	purine nucleoside biosynthetic process	50	8	3.71	0.02927
1	GO:0046129	purine ribonucleoside biosynthetic proce...	50	8	3.71	0.02927
1	GO:0006753	nucleoside phosphate metabolic process	195	22	14.45	0.03097
1	GO:0072522	purine-containing compound biosynthetic ...	70	10	5.19	0.03251
1	GO:0009127	purine nucleoside monophosphate biosynth...	42	7	3.11	0.03298
1	GO:0009168	purine ribonucleoside monophosphate bios...	42	7	3.11	0.03298
1	GO:0009259	ribonucleotide metabolic process	132	16	9.78	0.03429
1	GO:0006725	cellular aromatic compound metabolic pro...	1644	139	121.82	0.04085
1	GO:0006163	purine nucleotide metabolic process	135	16	10	0.04098
1	GO:0019752	carboxylic acid metabolic process	421	41	31.2	0.0416
1	GO:0042278	purine nucleoside metabolic process	126	15	9.34	0.04529
1	GO:0046128	purine ribonucleoside metabolic process	126	15	9.34	0.04529
1	GO:0048285	organelle fission	19	4	1.41	0.04739
1	GO:0009163	nucleoside biosynthetic process	55	8	4.08	0.04816
1	GO:0042455	ribonucleoside biosynthetic process	55	8	4.08	0.04816
1	GO:1901659	glycosyl compound biosynthetic process	55	8	4.08	0.04816
1	GO:0043436	oxoacid metabolic process	426	41	31.57	0.04865
1	GO:0072521	purine-containing compound metabolic pro...	149	17	11.04	0.04883
1	GO:0006928	movement of cell or subcellular componen...	75	10	5.56	0.04898
2	GO:0006221	pyrimidine nucleotide biosynthetic proce...	22	6	1.59	0.0038
2	GO:0006220	pyrimidine nucleotide metabolic process	23	6	1.66	0.0048
2	GO:0072527	pyrimidine-containing compound metabolic...	38	8	2.74	0.0049
2	GO:0006793	phosphorus metabolic process	1332	119	96.08	0.0055
2	GO:0006796	phosphate-containing compound metabolic ...	1330	118	95.94	0.0072
2	GO:0006213	pyrimidine nucleoside metabolic process	12	4	0.87	0.0083
2	GO:0046131	pyrimidine ribonucleoside metabolic proc...	12	4	0.87	0.0083
2	GO:0072528	pyrimidine-containing compound biosynthe...	35	7	2.52	0.0112
2	GO:0072350	tricarboxylic acid metabolic process	22	5	1.59	0.0181
2	GO:0070838	divalent metal ion transport	40	7	2.89	0.0227
2	GO:0072511	divalent inorganic cation transport	40	7	2.89	0.0227
2	GO:0006468	protein phosphorylation	949	84	68.45	0.0245
2	GO:0016310	phosphorylation	1047	91	75.52	0.0298
2	GO:0009218	pyrimidine ribonucleotide metabolic proc...	10	3	0.72	0.0306
2	GO:0009220	pyrimidine ribonucleotide biosynthetic p...	10	3	0.72	0.0306
2	GO:0046132	pyrimidine ribonucleoside biosynthetic p...	10	3	0.72	0.0306
2	GO:0046134	pyrimidine nucleoside biosynthetic proce...	10	3	0.72	0.0306
2	GO:0009312	oligosaccharide biosynthetic process	26	5	1.88	0.0356
2	GO:0000105	histidine biosynthetic process	11	3	0.79	0.0398
2	GO:0006547	histidine metabolic process	11	3	0.79	0.0398
2	GO:0052803	imidazole-containing compound metabolic ...	11	3	0.79	0.0398
2	GO:0044699	single-organism process	3618	281	260.97	0.0462
3	GO:1901566	organonitrogen compound biosynthetic pro...	736	63	40.04	0.00016
3	GO:1902600	hydrogen ion transmembrane transport	40	9	2.18	0.00023
3	GO:0009891	positive regulation of biosynthetic proc...	18	6	0.98	0.00027
3	GO:0010557	positive regulation of macromolecule bio...	18	6	0.98	0.00027
3	GO:0010604	positive regulation of macromolecule met...	18	6	0.98	0.00027
3	GO:0010628	positive regulation of gene expression	18	6	0.98	0.00027
3	GO:0031325	positive regulation of cellular metaboli...	18	6	0.98	0.00027
3	GO:0031328	positive regulation of cellular biosynth...	18	6	0.98	0.00027
3	GO:0051173	positive regulation of nitrogen compound...	18	6	0.98	0.00027
3	GO:0043933	macromolecular complex subunit organizat...	133	18	7.24	0.00029
3	GO:0009893	positive regulation of metabolic process	19	6	1.03	0.00037
3	GO:0007034	vacuolar transport	14	5	0.76	0.00062
3	GO:0034622	cellular macromolecular complex assembly	87	13	4.73	0.00078
3	GO:0006818	hydrogen transport	47	9	2.56	0.00082
3	GO:0015992	proton transport	47	9	2.56	0.00082
3	GO:0071822	protein complex subunit organization	99	14	5.39	0.00087
3	GO:0022607	cellular component assembly	124	16	6.75	0.00107
3	GO:0048522	positive regulation of cellular process	23	6	1.25	0.00114
3	GO:0098655	cation transmembrane transport	103	14	5.6	0.0013
3	GO:0098660	inorganic ion transmembrane transport	103	14	5.6	0.0013
3	GO:0098662	inorganic cation transmembrane transport	103	14	5.6	0.0013
3	GO:0048518	positive regulation of biological proces...	24	6	1.31	0.00146
3	GO:0065003	macromolecular complex assembly	95	13	5.17	0.0018
3	GO:0022904	respiratory electron transport chain	18	5	0.98	0.00221
3	GO:0016043	cellular component organization	324	30	17.63	0.00288
3	GO:0044281	small molecule metabolic process	715	56	38.9	0.00309
3	GO:0022900	electron transport chain	38	7	2.07	0.00391
3	GO:0015988	energy coupled proton transmembrane tran...	22	5	1.2	0.00568
3	GO:0015991	ATP hydrolysis coupled proton transport	22	5	1.2	0.00568
3	GO:0051649	establishment of localization in cell	243	23	13.22	0.00661
3	GO:0034220	ion transmembrane transport	123	14	6.69	0.00678
3	GO:1902582	single-organism intracellular transport	75	10	4.08	0.00708
3	GO:0051641	cellular localization	261	24	14.2	0.00795
3	GO:0046907	intracellular transport	219	21	11.92	0.008
3	GO:0009067	aspartate family amino acid biosynthetic...	24	5	1.31	0.00838
3	GO:0009161	ribonucleoside monophosphate metabolic p...	114	13	6.2	0.00877
3	GO:0071840	cellular component organization or bioge...	380	32	20.67	0.00879
3	GO:0044085	cellular component biogenesis	180	18	9.79	0.00897
3	GO:0009123	nucleoside monophosphate metabolic proce...	116	13	6.31	0.0101
3	GO:0009156	ribonucleoside monophosphate biosyntheti...	47	7	2.56	0.01279
3	GO:0051234	establishment of localization	1218	83	66.27	0.01485
3	GO:0009124	nucleoside monophosphate biosynthetic pr...	49	7	2.67	0.01593
3	GO:0009066	aspartate family amino acid metabolic pr...	28	5	1.52	0.01621
3	GO:0006810	transport	1209	82	65.78	0.01726
3	GO:0051179	localization	1227	83	66.76	0.01766
3	GO:0006006	glucose metabolic process	20	4	1.09	0.0209
3	GO:0015672	monovalent inorganic cation transport	102	11	5.55	0.02234
3	GO:0055086	nucleobase-containing small molecule met...	229	20	12.46	0.02427
3	GO:0015980	energy derivation by oxidation of organi...	44	6	2.39	0.03061
3	GO:0009116	nucleoside metabolic process	149	14	8.11	0.03188
3	GO:1901657	glycosyl compound metabolic process	149	14	8.11	0.03188
3	GO:0044271	cellular nitrogen compound biosynthetic ...	1500	97	81.61	0.03215
3	GO:0009141	nucleoside triphosphate metabolic proces...	108	11	5.88	0.03244
3	GO:0015985	energy coupled proton transport, down el...	23	4	1.25	0.03362
3	GO:0015986	ATP synthesis coupled proton transport	23	4	1.25	0.03362
3	GO:0009126	purine nucleoside monophosphate metaboli...	109	11	5.93	0.03439
3	GO:0009167	purine ribonucleoside monophosphate meta...	109	11	5.93	0.03439
3	GO:0034641	cellular nitrogen compound metabolic pro...	2044	128	111.21	0.0345
3	GO:0019693	ribose phosphate metabolic process	151	14	8.22	0.03516
3	GO:0006753	nucleoside phosphate metabolic process	195	17	10.61	0.03648
3	GO:0006119	oxidative phosphorylation	14	3	0.76	0.03719
3	GO:0042773	ATP synthesis coupled electron transport	14	3	0.76	0.03719
3	GO:0010467	gene expression	1493	96	81.23	0.0377
3	GO:0046034	ATP metabolic process	98	10	5.33	0.03985
3	GO:0045333	cellular respiration	36	5	1.96	0.0437
3	GO:0006812	cation transport	275	22	14.96	0.0442
3	GO:0006807	nitrogen compound metabolic process	2257	139	122.8	0.04438
3	GO:0044765	single-organism transport	842	57	45.81	0.04619
3	GO:1902578	single-organism localization	860	58	46.79	0.04732
4	GO:0009628	response to abiotic stimulus	18	6	0.89	0.00016
4	GO:0034637	cellular carbohydrate biosynthetic proce...	80	11	3.96	0.00182
4	GO:0016051	carbohydrate biosynthetic process	85	11	4.21	0.00298
4	GO:0044262	cellular carbohydrate metabolic process	126	14	6.23	0.00366
4	GO:0000160	phosphorelay signal transduction system	58	8	2.87	0.00731
4	GO:1901617	organic hydroxy compound biosynthetic pr...	10	3	0.49	0.01112
4	GO:0000271	polysaccharide biosynthetic process	54	7	2.67	0.01637
4	GO:0009250	glucan biosynthetic process	54	7	2.67	0.01637
4	GO:0033692	cellular polysaccharide biosynthetic pro...	54	7	2.67	0.01637
4	GO:0007275	multicellular organismal development	13	3	0.64	0.02374
4	GO:0044707	single-multicellular organism process	13	3	0.64	0.02374
4	GO:0009110	vitamin biosynthetic process	23	4	1.14	0.02477
4	GO:0042364	water-soluble vitamin biosynthetic proce...	23	4	1.14	0.02477
4	GO:0005976	polysaccharide metabolic process	87	9	4.31	0.02754
4	GO:0006766	vitamin metabolic process	24	4	1.19	0.02859
4	GO:0006767	water-soluble vitamin metabolic process	24	4	1.19	0.02859
4	GO:0005975	carbohydrate metabolic process	603	40	29.84	0.03356
4	GO:0006073	cellular glucan metabolic process	77	8	3.81	0.0358
4	GO:0044042	glucan metabolic process	77	8	3.81	0.0358
4	GO:0044264	cellular polysaccharide metabolic proces...	77	8	3.81	0.0358
5	GO:0016567	protein ubiquitination	77	12	3.53	0.00018
5	GO:0006351	transcription, DNA-templated	865	62	39.61	0.00019
5	GO:0032774	RNA biosynthetic process	865	62	39.61	0.00019
5	GO:0097659	nucleic acid-templated transcription	865	62	39.61	0.00019
5	GO:0032446	protein modification by small protein co...	79	12	3.62	0.00023
5	GO:0070647	protein modification by small protein co...	80	12	3.66	0.00026
5	GO:0034654	nucleobase-containing compound biosynthe...	968	65	44.32	0.00082
5	GO:0018130	heterocycle biosynthetic process	1068	69	48.9	0.00158
5	GO:0006464	cellular protein modification process	1207	75	55.27	0.00279
5	GO:0036211	protein modification process	1207	75	55.27	0.00279
5	GO:1901362	organic cyclic compound biosynthetic pro...	1099	69	50.32	0.00328
5	GO:0006887	exocytosis	23	5	1.05	0.00333
5	GO:0032940	secretion by cell	24	5	1.1	0.00405
5	GO:0046903	secretion	24	5	1.1	0.00405
5	GO:0019438	aromatic compound biosynthetic process	1055	66	48.31	0.00442
5	GO:0016192	vesicle-mediated transport	126	13	5.77	0.00494
5	GO:0043412	macromolecule modification	1252	75	57.33	0.0071
5	GO:0044260	cellular macromolecule metabolic process	3124	166	143.05	0.00748
5	GO:0043170	macromolecule metabolic process	3448	180	157.88	0.01037
5	GO:0016070	RNA metabolic process	1087	65	49.77	0.01283
5	GO:0090304	nucleic acid metabolic process	1252	73	57.33	0.01477
5	GO:0034645	cellular macromolecule biosynthetic proc...	1453	83	66.53	0.0152
5	GO:0006839	mitochondrial transport	12	3	0.55	0.01539
5	GO:0009059	macromolecule biosynthetic process	1454	83	66.58	0.01546
5	GO:0016226	iron-sulfur cluster assembly	17	3	0.78	0.04017
5	GO:0031163	metallo-sulfur cluster assembly	17	3	0.78	0.04017
6	GO:0046907	intracellular transport	219	19	8.33	0.00066
6	GO:0051649	establishment of localization in cell	243	20	9.24	0.00093
6	GO:0034613	cellular protein localization	191	17	7.26	0.00094
6	GO:0070727	cellular macromolecule localization	191	17	7.26	0.00094
6	GO:0008104	protein localization	228	19	8.67	0.00107
6	GO:0007018	microtubule-based movement	72	9	2.74	0.00153
6	GO:0006928	movement of cell or subcellular componen...	75	9	2.85	0.00204
6	GO:0051716	cellular response to stimulus	445	29	16.93	0.00305
6	GO:0033036	macromolecule localization	272	20	10.35	0.00355
6	GO:0016192	vesicle-mediated transport	126	11	4.79	0.00837
6	GO:0015988	energy coupled proton transmembrane tran...	22	4	0.84	0.00873
6	GO:0015991	ATP hydrolysis coupled proton transport	22	4	0.84	0.00873
6	GO:0045184	establishment of protein localization	220	16	8.37	0.00962
6	GO:0046034	ATP metabolic process	98	9	3.73	0.012
6	GO:0015031	protein transport	211	15	8.03	0.01453
6	GO:0006886	intracellular protein transport	174	13	6.62	0.0152
6	GO:0009144	purine nucleoside triphosphate metabolic...	105	9	3.99	0.01822
6	GO:0009199	ribonucleoside triphosphate metabolic pr...	105	9	3.99	0.01822
6	GO:0009205	purine ribonucleoside triphosphate metab...	105	9	3.99	0.01822
6	GO:0006091	generation of precursor metabolites and ...	123	10	4.68	0.01852
6	GO:0006511	ubiquitin-dependent protein catabolic pr...	73	7	2.78	0.02051
6	GO:0019941	modification-dependent protein catabolic...	73	7	2.78	0.02051
6	GO:0043632	modification-dependent macromolecule cat...	73	7	2.78	0.02051
6	GO:0000278	mitotic cell cycle	16	3	0.61	0.02112
6	GO:1903047	mitotic cell cycle process	16	3	0.61	0.02112
6	GO:0009141	nucleoside triphosphate metabolic proces...	108	9	4.11	0.0215
6	GO:0042278	purine nucleoside metabolic process	126	10	4.79	0.02154
6	GO:0046128	purine ribonucleoside metabolic process	126	10	4.79	0.02154
6	GO:0009126	purine nucleoside monophosphate metaboli...	109	9	4.15	0.02269
6	GO:0009167	purine ribonucleoside monophosphate meta...	109	9	4.15	0.02269
6	GO:0006396	RNA processing	165	12	6.28	0.02327
6	GO:1902582	single-organism intracellular transport	75	7	2.85	0.02344
6	GO:0007165	signal transduction	349	21	13.27	0.02484
6	GO:0023052	signaling	349	21	13.27	0.02484
6	GO:0044700	single organism signaling	349	21	13.27	0.02484
6	GO:0009987	cellular process	5411	222	205.81	0.02565
6	GO:0033554	cellular response to stress	94	8	3.58	0.02626
6	GO:0007017	microtubule-based process	114	9	4.34	0.02931
6	GO:0009161	ribonucleoside monophosphate metabolic p...	114	9	4.34	0.02931
6	GO:0009119	ribonucleoside metabolic process	133	10	5.06	0.02998
6	GO:0006818	hydrogen transport	47	5	1.79	0.03205
6	GO:0015992	proton transport	47	5	1.79	0.03205
6	GO:0009123	nucleoside monophosphate metabolic proce...	116	9	4.41	0.0323
6	GO:0048285	organelle fission	19	3	0.72	0.03361
6	GO:0051301	cell division	19	3	0.72	0.03361
6	GO:0043170	macromolecule metabolic process	3448	147	131.15	0.03619
6	GO:0046483	heterocycle metabolic process	1612	74	61.31	0.04037
6	GO:0006139	nucleobase-containing compound metabolic...	1499	69	57.02	0.04533
6	GO:0006096	glycolytic process	52	5	1.98	0.04666
6	GO:0006757	ATP generation from ADP	52	5	1.98	0.04666
6	GO:0009135	purine nucleoside diphosphate metabolic ...	52	5	1.98	0.04666
6	GO:0009179	purine ribonucleoside diphosphate metabo...	52	5	1.98	0.04666
6	GO:0009185	ribonucleoside diphosphate metabolic pro...	52	5	1.98	0.04666
6	GO:0046031	ADP metabolic process	52	5	1.98	0.04666
6	GO:0006508	proteolysis	374	21	14.23	0.04709
7	GO:0044724	single-organism carbohydrate catabolic p...	57	10	2.46	0.00014
7	GO:0006165	nucleoside diphosphate phosphorylation	59	10	2.54	0.00018
7	GO:0046939	nucleotide phosphorylation	59	10	2.54	0.00018
7	GO:0009132	nucleoside diphosphate metabolic process	61	10	2.63	0.00025
7	GO:0044723	single-organism carbohydrate metabolic p...	247	23	10.64	0.00039
7	GO:0016052	carbohydrate catabolic process	67	10	2.89	0.00054
7	GO:0019362	pyridine nucleotide metabolic process	80	11	3.45	0.00059
7	GO:0046496	nicotinamide nucleotide metabolic proces...	80	11	3.45	0.00059
7	GO:0006733	oxidoreduction coenzyme metabolic proces...	82	11	3.53	0.00073
7	GO:0072524	pyridine-containing compound metabolic p...	84	11	3.62	0.00089
7	GO:0019752	carboxylic acid metabolic process	421	31	18.14	0.00231
7	GO:0043436	oxoacid metabolic process	426	31	18.35	0.00277
7	GO:0006082	organic acid metabolic process	427	31	18.4	0.00288
7	GO:0044712	single-organism catabolic process	135	13	5.82	0.00533
7	GO:0006091	generation of precursor metabolites and ...	123	12	5.3	0.00659
7	GO:0071554	cell wall organization or biogenesis	79	9	3.4	0.00663
7	GO:1901135	carbohydrate derivative metabolic proces...	274	21	11.8	0.00735
7	GO:0044710	single-organism metabolic process	2091	110	90.08	0.00851
7	GO:0046034	ATP metabolic process	98	10	4.22	0.00933
7	GO:0009144	purine nucleoside triphosphate metabolic...	105	10	4.52	0.01476
7	GO:0009199	ribonucleoside triphosphate metabolic pr...	105	10	4.52	0.01476
7	GO:0009205	purine ribonucleoside triphosphate metab...	105	10	4.52	0.01476
7	GO:0006633	fatty acid biosynthetic process	62	7	2.67	0.01665
7	GO:0009141	nucleoside triphosphate metabolic proces...	108	10	4.65	0.0177
7	GO:0044255	cellular lipid metabolic process	209	16	9	0.01824
7	GO:0009126	purine nucleoside monophosphate metaboli...	109	10	4.7	0.01877
7	GO:0009167	purine ribonucleoside monophosphate meta...	109	10	4.7	0.01877
7	GO:0045229	external encapsulating structure organiz...	65	7	2.8	0.02113
7	GO:0071555	cell wall organization	65	7	2.8	0.02113
7	GO:0072330	monocarboxylic acid biosynthetic process	67	7	2.89	0.02455
7	GO:0009161	ribonucleoside monophosphate metabolic p...	114	10	4.91	0.02485
7	GO:0042545	cell wall modification	39	5	1.68	0.02493
7	GO:0009123	nucleoside monophosphate metabolic proce...	116	10	5	0.02763
7	GO:0006732	coenzyme metabolic process	133	11	5.73	0.02817
7	GO:0019637	organophosphate metabolic process	297	20	12.8	0.0314
7	GO:0006631	fatty acid metabolic process	71	7	3.06	0.03249
7	GO:0009719	response to endogenous stimulus	29	4	1.25	0.03435
7	GO:0009725	response to hormone	29	4	1.25	0.03435
7	GO:0010033	response to organic substance	29	4	1.25	0.03435
7	GO:0009112	nucleobase metabolic process	17	3	0.73	0.03441
7	GO:0009117	nucleotide metabolic process	191	14	8.23	0.03611
7	GO:0006753	nucleoside phosphate metabolic process	195	14	8.4	0.04186
7	GO:0051186	cofactor metabolic process	160	12	6.89	0.04321
7	GO:0042278	purine nucleoside metabolic process	126	10	5.43	0.04496
7	GO:0046128	purine ribonucleoside metabolic process	126	10	5.43	0.04496
7	GO:0008610	lipid biosynthetic process	162	12	6.98	0.04677
7	GO:0016310	phosphorylation	1047	56	45.11	0.04803
8	GO:0005991	trehalose metabolic process	23	6	0.84	0.00013
8	GO:0046351	disaccharide biosynthetic process	24	6	0.87	0.00017
8	GO:0009312	oligosaccharide biosynthetic process	26	6	0.94	0.00027
8	GO:0044262	cellular carbohydrate metabolic process	126	13	4.58	0.00063
8	GO:0030001	metal ion transport	190	15	6.9	0.00379
8	GO:0019751	polyol metabolic process	10	3	0.36	0.0047
8	GO:0005975	carbohydrate metabolic process	603	34	21.9	0.0065
8	GO:0046839	phospholipid dephosphorylation	12	3	0.44	0.00817
8	GO:0046856	phosphatidylinositol dephosphorylation	12	3	0.44	0.00817
8	GO:0034637	cellular carbohydrate biosynthetic proce...	80	8	2.9	0.00825
8	GO:0044699	single-organism process	3618	152	131.38	0.00832
8	GO:0044723	single-organism carbohydrate metabolic p...	247	17	8.97	0.00842
8	GO:0065007	biological regulation	1311	63	47.61	0.00986
8	GO:0006066	alcohol metabolic process	24	4	0.87	0.01019
8	GO:0016051	carbohydrate biosynthetic process	85	8	3.09	0.01174
8	GO:0050794	regulation of cellular process	1249	60	45.35	0.01195
8	GO:0050789	regulation of biological process	1283	61	46.59	0.01387
8	GO:0006650	glycerophospholipid metabolic process	60	6	2.18	0.02108
8	GO:0044763	single-organism cellular process	2362	102	85.77	0.02117
8	GO:1901615	organic hydroxy compound metabolic proce...	30	4	1.09	0.02218
8	GO:0046488	phosphatidylinositol metabolic process	45	5	1.63	0.02274
8	GO:0009889	regulation of biosynthetic process	778	39	28.25	0.02297
8	GO:0010556	regulation of macromolecule biosynthetic...	778	39	28.25	0.02297
8	GO:0031326	regulation of cellular biosynthetic proc...	778	39	28.25	0.02297
8	GO:2000112	regulation of cellular macromolecule bio...	778	39	28.25	0.02297
8	GO:0051171	regulation of nitrogen compound metaboli...	782	39	28.4	0.0247
8	GO:0010468	regulation of gene expression	791	39	28.72	0.02898
8	GO:0006355	regulation of transcription, DNA-templat...	767	38	27.85	0.02899
8	GO:1903506	regulation of nucleic acid-templated tra...	767	38	27.85	0.02899
8	GO:2001141	regulation of RNA biosynthetic process	767	38	27.85	0.02899
8	GO:0006351	transcription, DNA-templated	865	42	31.41	0.02974
8	GO:0032774	RNA biosynthetic process	865	42	31.41	0.02974
8	GO:0097659	nucleic acid-templated transcription	865	42	31.41	0.02974
8	GO:0051252	regulation of RNA metabolic process	769	38	27.92	0.03003
8	GO:0030258	lipid modification	33	4	1.2	0.03044
8	GO:0019219	regulation of nucleobase-containing comp...	774	38	28.11	0.03276
8	GO:0016052	carbohydrate catabolic process	67	6	2.43	0.03412
8	GO:0080090	regulation of primary metabolic process	801	39	29.09	0.03439
8	GO:0031323	regulation of cellular metabolic process	802	39	29.12	0.03497
8	GO:0006629	lipid metabolic process	358	20	13	0.03622
8	GO:0046486	glycerolipid metabolic process	68	6	2.47	0.03633
8	GO:0006812	cation transport	275	16	9.99	0.04224
8	GO:0060255	regulation of macromolecule metabolic pr...	817	39	29.67	0.04464
8	GO:0071704	organic substance metabolic process	4810	189	174.66	0.04676
8	GO:0000272	polysaccharide catabolic process	10	2	0.36	0.04878
8	GO:0044238	primary metabolic process	4619	182	167.73	0.049
8	GO:0019222	regulation of metabolic process	823	39	29.88	0.04902
9	GO:0006725	cellular aromatic compound metabolic pro...	1644	87	60.3	0.00011
9	GO:0090304	nucleic acid metabolic process	1252	68	45.93	0.00039
9	GO:0016070	RNA metabolic process	1087	58	39.87	0.00175
9	GO:0006399	tRNA metabolic process	76	9	2.79	0.00175
9	GO:0006418	tRNA aminoacylation for protein translat...	36	6	1.32	0.00178
9	GO:0043038	amino acid activation	36	6	1.32	0.00178
9	GO:0043039	tRNA aminoacylation	36	6	1.32	0.00178
9	GO:0071840	cellular component organization or bioge...	380	25	13.94	0.00322
9	GO:0006479	protein methylation	20	4	0.73	0.0054
9	GO:0008213	protein alkylation	20	4	0.73	0.0054
9	GO:0008152	metabolic process	6254	247	229.41	0.00693
9	GO:0018193	peptidyl-amino acid modification	48	6	1.76	0.00777
9	GO:0043414	macromolecule methylation	36	5	1.32	0.00952
9	GO:0072522	purine-containing compound biosynthetic ...	70	7	2.57	0.01384
9	GO:0009165	nucleotide biosynthetic process	88	8	3.23	0.01511
9	GO:1901293	nucleoside phosphate biosynthetic proces...	88	8	3.23	0.01511
9	GO:0006164	purine nucleotide biosynthetic process	57	6	2.09	0.01749
9	GO:0009127	purine nucleoside monophosphate biosynth...	42	5	1.54	0.01798
9	GO:0009168	purine ribonucleoside monophosphate bios...	42	5	1.54	0.01798
9	GO:0009451	RNA modification	42	5	1.54	0.01798
9	GO:0032259	methylation	44	5	1.61	0.02164
9	GO:0009156	ribonucleoside monophosphate biosyntheti...	47	5	1.72	0.02799
9	GO:0000413	protein peptidyl-prolyl isomerization	33	4	1.21	0.03144
9	GO:0018208	peptidyl-proline modification	33	4	1.21	0.03144
9	GO:0006260	DNA replication	49	5	1.8	0.03281
9	GO:0009124	nucleoside monophosphate biosynthetic pr...	49	5	1.8	0.03281
9	GO:0006457	protein folding	143	10	5.25	0.0372
9	GO:0055086	nucleobase-containing small molecule met...	229	14	8.4	0.04202
9	GO:0009152	purine ribonucleotide biosynthetic proce...	53	5	1.94	0.04393
9	GO:0006904	vesicle docking involved in exocytosis	10	2	0.37	0.04968
9	GO:0022406	membrane docking	10	2	0.37	0.04968
9	GO:0048278	vesicle docking	10	2	0.37	0.04968
10	GO:0010467	gene expression	1493	88	62.3	0.00026
10	GO:0044271	cellular nitrogen compound biosynthetic ...	1500	88	62.59	0.00031
10	GO:0043170	macromolecule metabolic process	3448	175	143.88	0.00032
10	GO:0015979	photosynthesis	80	11	3.34	0.00045
10	GO:0044267	cellular protein metabolic process	1840	103	76.78	0.00047
10	GO:0006807	nitrogen compound metabolic process	2257	122	94.18	0.00047
10	GO:0034641	cellular nitrogen compound metabolic pro...	2044	112	85.29	0.00055
10	GO:0006778	porphyrin-containing compound metabolic ...	26	6	1.08	0.00057
10	GO:0042440	pigment metabolic process	36	7	1.5	0.00061
10	GO:0071704	organic substance metabolic process	4810	228	200.71	0.00112
10	GO:0008152	metabolic process	6254	282	260.97	0.00267
10	GO:0044237	cellular metabolic process	4137	198	172.63	0.00283
10	GO:0044238	primary metabolic process	4619	215	192.74	0.0071
10	GO:0046148	pigment biosynthetic process	31	5	1.29	0.00853
10	GO:1901576	organic substance biosynthetic process	1943	100	81.08	0.00933
10	GO:0044249	cellular biosynthetic process	1922	99	80.2	0.00951
10	GO:0006779	porphyrin-containing compound biosynthet...	21	4	0.88	0.01015
10	GO:0045184	establishment of protein localization	220	17	9.18	0.01043
10	GO:0015995	chlorophyll biosynthetic process	12	3	0.5	0.01196
10	GO:0008104	protein localization	228	17	9.51	0.01451
10	GO:0006418	tRNA aminoacylation for protein translat...	36	5	1.5	0.01598
10	GO:0043038	amino acid activation	36	5	1.5	0.01598
10	GO:0043039	tRNA aminoacylation	36	5	1.5	0.01598
10	GO:0006563	L-serine metabolic process	24	4	1	0.01633
10	GO:0015994	chlorophyll metabolic process	14	3	0.58	0.01861
10	GO:0044270	cellular nitrogen compound catabolic pro...	26	4	1.08	0.02153
10	GO:0046700	heterocycle catabolic process	26	4	1.08	0.02153
10	GO:0001522	pseudouridine synthesis	15	3	0.63	0.02256
10	GO:0006720	isoprenoid metabolic process	40	5	1.67	0.02438
10	GO:0008299	isoprenoid biosynthetic process	40	5	1.67	0.02438
10	GO:0034645	cellular macromolecule biosynthetic proc...	1453	75	60.63	0.02445
10	GO:0009059	macromolecule biosynthetic process	1454	75	60.67	0.02481
10	GO:0044260	cellular macromolecule metabolic process	3124	148	130.36	0.02589
10	GO:0019684	photosynthesis, light reaction	16	3	0.67	0.02692
10	GO:0015031	protein transport	211	15	8.8	0.03047
10	GO:0009058	biosynthetic process	2062	101	86.04	0.03421
10	GO:0033036	macromolecule localization	272	18	11.35	0.03536
10	GO:0006721	terpenoid metabolic process	19	3	0.79	0.0425
10	GO:0016114	terpenoid biosynthetic process	19	3	0.79	0.0425
10	GO:0006396	RNA processing	165	12	6.89	0.04296
10	GO:0065003	macromolecular complex assembly	95	8	3.96	0.04431
11	GO:0044260	cellular macromolecule metabolic process	3124	138	108.82	0.00021
11	GO:0043170	macromolecule metabolic process	3448	148	120.11	0.00043
11	GO:0042221	response to chemical	87	10	3.03	0.00084
11	GO:0050794	regulation of cellular process	1249	63	43.51	0.00115
11	GO:0065007	biological regulation	1311	65	45.67	0.00147
11	GO:0050789	regulation of biological process	1283	63	44.69	0.00226
11	GO:0009987	cellular process	5411	209	188.49	0.00452
11	GO:0050896	response to stimulus	721	38	25.12	0.00615
11	GO:0016071	mRNA metabolic process	49	6	1.71	0.00673
11	GO:0046907	intracellular transport	219	15	7.63	0.00945
11	GO:0016070	RNA metabolic process	1087	52	37.87	0.00966
11	GO:0006355	regulation of transcription, DNA-templat...	767	39	26.72	0.00987
11	GO:1903506	regulation of nucleic acid-templated tra...	767	39	26.72	0.00987
11	GO:2001141	regulation of RNA biosynthetic process	767	39	26.72	0.00987
11	GO:0051252	regulation of RNA metabolic process	769	39	26.79	0.01028
11	GO:0019219	regulation of nucleobase-containing comp...	774	39	26.96	0.01138
11	GO:0006605	protein targeting	26	4	0.91	0.01177
11	GO:0009889	regulation of biosynthetic process	778	39	27.1	0.01232
11	GO:0010556	regulation of macromolecule biosynthetic...	778	39	27.1	0.01232
11	GO:0031326	regulation of cellular biosynthetic proc...	778	39	27.1	0.01232
11	GO:2000112	regulation of cellular macromolecule bio...	778	39	27.1	0.01232
11	GO:0051171	regulation of nitrogen compound metaboli...	782	39	27.24	0.01332
11	GO:0008037	cell recognition	74	7	2.58	0.0142
11	GO:0009856	pollination	74	7	2.58	0.0142
11	GO:0009875	pollen-pistil interaction	74	7	2.58	0.0142
11	GO:0044706	multi-multicellular organism process	74	7	2.58	0.0142
11	GO:0048544	recognition of pollen	74	7	2.58	0.0142
11	GO:0007154	cell communication	429	24	14.94	0.01443
11	GO:1902582	single-organism intracellular transport	75	7	2.61	0.01521
11	GO:0015031	protein transport	211	14	7.35	0.01545
11	GO:0006351	transcription, DNA-templated	865	42	30.13	0.0158
11	GO:0032774	RNA biosynthetic process	865	42	30.13	0.0158
11	GO:0097659	nucleic acid-templated transcription	865	42	30.13	0.0158
11	GO:0010468	regulation of gene expression	791	39	27.55	0.01583
11	GO:0090304	nucleic acid metabolic process	1252	57	43.61	0.01777
11	GO:0006886	intracellular protein transport	174	12	6.06	0.01831
11	GO:0080090	regulation of primary metabolic process	801	39	27.9	0.01906
11	GO:0031323	regulation of cellular metabolic process	802	39	27.94	0.01941
11	GO:0044703	multi-organism reproductive process	79	7	2.75	0.01976
11	GO:0016042	lipid catabolic process	17	3	0.59	0.0198
11	GO:0045184	establishment of protein localization	220	14	7.66	0.02142
11	GO:0022414	reproductive process	81	7	2.82	0.02237
11	GO:0051649	establishment of localization in cell	243	15	8.46	0.02251
11	GO:0051704	multi-organism process	82	7	2.86	0.02375
11	GO:0060255	regulation of macromolecule metabolic pr...	817	39	28.46	0.02531
11	GO:0071702	organic substance transport	314	18	10.94	0.02577
11	GO:0033036	macromolecule localization	272	16	9.48	0.02799
11	GO:0019222	regulation of metabolic process	823	39	28.67	0.02804
11	GO:0008104	protein localization	228	14	7.94	0.02805
11	GO:0006810	transport	1209	54	42.12	0.02932
11	GO:0016192	vesicle-mediated transport	126	9	4.39	0.03152
11	GO:0032501	multicellular organismal process	87	7	3.03	0.03158
11	GO:0051234	establishment of localization	1218	54	42.43	0.0332
11	GO:0034613	cellular protein localization	191	12	6.65	0.03463
11	GO:0070727	cellular macromolecule localization	191	12	6.65	0.03463
11	GO:0072594	establishment of protein localization to...	21	3	0.73	0.03497
11	GO:0018130	heterocycle biosynthetic process	1068	48	37.2	0.03586
11	GO:0051179	localization	1227	54	42.74	0.03749
11	GO:0051641	cellular localization	261	15	9.09	0.03898
11	GO:0000271	polysaccharide biosynthetic process	54	5	1.88	0.03904
11	GO:0009250	glucan biosynthetic process	54	5	1.88	0.03904
11	GO:0033692	cellular polysaccharide biosynthetic pro...	54	5	1.88	0.03904
11	GO:0007186	G-protein coupled receptor signaling pat...	23	3	0.8	0.04426
11	GO:0009110	vitamin biosynthetic process	23	3	0.8	0.04426
11	GO:0042364	water-soluble vitamin biosynthetic proce...	23	3	0.8	0.04426
11	GO:0044087	regulation of cellular component biogene...	10	2	0.35	0.04524
11	GO:0044242	cellular lipid catabolic process	10	2	0.35	0.04524
11	GO:0034645	cellular macromolecule biosynthetic proc...	1453	62	50.62	0.0454
11	GO:0009059	macromolecule biosynthetic process	1454	62	50.65	0.04594
11	GO:0016482	cytoplasmic transport	76	6	2.65	0.04858
11	GO:0006766	vitamin metabolic process	24	3	0.84	0.04933
11	GO:0006767	water-soluble vitamin metabolic process	24	3	0.84	0.04933
12	GO:0051276	chromosome organization	86	11	2.83	0.00011
12	GO:0044237	cellular metabolic process	4137	166	135.96	0.00011
12	GO:0044238	primary metabolic process	4619	181	151.81	0.00013
12	GO:0043412	macromolecule modification	1252	64	41.15	0.00013
12	GO:0006464	cellular protein modification process	1207	62	39.67	0.00015
12	GO:0036211	protein modification process	1207	62	39.67	0.00015
12	GO:0006996	organelle organization	155	15	5.09	0.00017
12	GO:0090304	nucleic acid metabolic process	1252	63	41.15	0.00024
12	GO:0071704	organic substance metabolic process	4810	184	158.08	0.00055
12	GO:0006325	chromatin organization	54	7	1.77	0.00181
12	GO:0016310	phosphorylation	1047	51	34.41	0.0022
12	GO:0006397	mRNA processing	42	6	1.38	0.00231
12	GO:0006468	protein phosphorylation	949	47	31.19	0.00241
12	GO:0006511	ubiquitin-dependent protein catabolic pr...	73	8	2.4	0.00259
12	GO:0019941	modification-dependent protein catabolic...	73	8	2.4	0.00259
12	GO:0043632	modification-dependent macromolecule cat...	73	8	2.4	0.00259
12	GO:0019538	protein metabolic process	2140	91	70.33	0.00267
12	GO:0044257	cellular protein catabolic process	90	9	2.96	0.0027
12	GO:0051603	proteolysis involved in cellular protein...	90	9	2.96	0.0027
12	GO:0016569	covalent chromatin modification	19	4	0.62	0.00299
12	GO:0016570	histone modification	19	4	0.62	0.00299
12	GO:0044248	cellular catabolic process	186	14	6.11	0.00321
12	GO:0006796	phosphate-containing compound metabolic ...	1330	61	43.71	0.00327
12	GO:0016482	cytoplasmic transport	76	8	2.5	0.00334
12	GO:0006793	phosphorus metabolic process	1332	61	43.78	0.00338
12	GO:0044267	cellular protein metabolic process	1840	79	60.47	0.00449
12	GO:0006352	DNA-templated transcription, initiation	34	5	1.12	0.0047
12	GO:0006888	ER to Golgi vesicle-mediated transport	11	3	0.36	0.00476
12	GO:0016070	RNA metabolic process	1087	51	35.72	0.00479
12	GO:1902589	single-organism organelle organization	64	7	2.1	0.0048
12	GO:0016071	mRNA metabolic process	49	6	1.61	0.00509
12	GO:0046483	heterocycle metabolic process	1612	70	52.98	0.0061
12	GO:0048193	Golgi vesicle transport	23	4	0.76	0.00617
12	GO:0006265	DNA topological change	12	3	0.39	0.0062
12	GO:0030163	protein catabolic process	102	9	3.35	0.00622
12	GO:0044265	cellular macromolecule catabolic process	102	9	3.35	0.00622
12	GO:0006259	DNA metabolic process	168	12	5.52	0.00926
12	GO:0006725	cellular aromatic compound metabolic pro...	1644	70	54.03	0.00973
12	GO:0006351	transcription, DNA-templated	865	41	28.43	0.0098
12	GO:0032774	RNA biosynthetic process	865	41	28.43	0.0098
12	GO:0097659	nucleic acid-templated transcription	865	41	28.43	0.0098
12	GO:0016043	cellular component organization	324	19	10.65	0.01024
12	GO:1902582	single-organism intracellular transport	75	7	2.46	0.01132
12	GO:0000375	RNA splicing, via transesterification re...	15	3	0.49	0.01191
12	GO:0000377	RNA splicing, via transesterification re...	15	3	0.49	0.01191
12	GO:0000398	mRNA splicing, via spliceosome	15	3	0.49	0.01191
12	GO:0006886	intracellular protein transport	174	12	5.72	0.01204
12	GO:0046907	intracellular transport	219	14	7.2	0.01308
12	GO:1901360	organic cyclic compound metabolic proces...	1676	70	55.08	0.01505
12	GO:0009057	macromolecule catabolic process	138	10	4.54	0.01533
12	GO:0006284	base-excision repair	17	3	0.56	0.01696
12	GO:0009056	catabolic process	278	16	9.14	0.02076
12	GO:0006508	proteolysis	374	20	12.29	0.02154
12	GO:0034654	nucleobase-containing compound biosynthe...	968	43	31.81	0.0233
12	GO:0034613	cellular protein localization	191	12	6.28	0.02344
12	GO:0070727	cellular macromolecule localization	191	12	6.28	0.02344
12	GO:0071840	cellular component organization or bioge...	380	20	12.49	0.02504
12	GO:0051649	establishment of localization in cell	243	14	7.99	0.02924
12	GO:0006664	glycolipid metabolic process	22	3	0.72	0.03407
12	GO:0008380	RNA splicing	22	3	0.72	0.03407
12	GO:1903509	liposaccharide metabolic process	22	3	0.72	0.03407
12	GO:0033554	cellular response to stress	94	7	3.09	0.03467
12	GO:1901575	organic substance catabolic process	273	15	8.97	0.03532
12	GO:0006643	membrane lipid metabolic process	23	3	0.76	0.03825
12	GO:0034641	cellular nitrogen compound metabolic pro...	2044	80	67.18	0.0404
12	GO:0015031	protein transport	211	12	6.93	0.04527
12	GO:0006644	phospholipid metabolic process	80	6	2.63	0.04737
12	GO:0051641	cellular localization	261	14	8.58	0.04866
12	GO:0017038	protein import	11	2	0.36	0.04867
12	GO:0010467	gene expression	1493	60	49.07	0.04941
13	GO:0006355	regulation of transcription, DNA-templat...	767	47	28.32	0.00032
13	GO:1903506	regulation of nucleic acid-templated tra...	767	47	28.32	0.00032
13	GO:2001141	regulation of RNA biosynthetic process	767	47	28.32	0.00032
13	GO:0051252	regulation of RNA metabolic process	769	47	28.4	0.00034
13	GO:0010468	regulation of gene expression	791	48	29.21	0.00035
13	GO:0060255	regulation of macromolecule metabolic pr...	817	49	30.17	0.00039
13	GO:0009889	regulation of biosynthetic process	778	47	28.73	0.00044
13	GO:0010556	regulation of macromolecule biosynthetic...	778	47	28.73	0.00044
13	GO:0031326	regulation of cellular biosynthetic proc...	778	47	28.73	0.00044
13	GO:2000112	regulation of cellular macromolecule bio...	778	47	28.73	0.00044
13	GO:0080090	regulation of primary metabolic process	801	48	29.58	0.00046
13	GO:0019222	regulation of metabolic process	823	49	30.39	0.00046
13	GO:0031323	regulation of cellular metabolic process	802	47	29.62	0.00087
13	GO:0006351	transcription, DNA-templated	865	47	31.94	0.00405
13	GO:0032774	RNA biosynthetic process	865	47	31.94	0.00405
13	GO:0097659	nucleic acid-templated transcription	865	47	31.94	0.00405
13	GO:0006508	proteolysis	374	24	13.81	0.00574
13	GO:0050789	regulation of biological process	1283	63	47.38	0.00898
13	GO:0065007	biological regulation	1311	64	48.41	0.00956
13	GO:0050794	regulation of cellular process	1249	61	46.12	0.01139
13	GO:0006950	response to stress	292	18	10.78	0.02272
13	GO:0005975	carbohydrate metabolic process	603	32	22.27	0.02322
13	GO:0034654	nucleobase-containing compound biosynthe...	968	47	35.75	0.02866
13	GO:0019438	aromatic compound biosynthetic process	1055	50	38.96	0.03571
13	GO:0005976	polysaccharide metabolic process	87	7	3.21	0.0413
13	GO:0043648	dicarboxylic acid metabolic process	36	4	1.33	0.04245
13	GO:1901362	organic cyclic compound biosynthetic pro...	1099	51	40.58	0.04714
14	GO:0006412	translation	436	85	14.71	< 1e-30
14	GO:0043043	peptide biosynthetic process	441	85	14.87	< 1e-30
14	GO:0043604	amide biosynthetic process	454	86	15.31	< 1e-30
14	GO:0006518	peptide metabolic process	453	85	15.28	< 1e-30
14	GO:0043603	cellular amide metabolic process	475	86	16.02	< 1e-30
14	GO:1901566	organonitrogen compound biosynthetic pro...	736	97	24.82	< 1e-30
14	GO:0044085	cellular component biogenesis	180	15	6.07	0.0011
14	GO:0042451	purine nucleoside biosynthetic process	50	5	1.69	0.0259
14	GO:0046129	purine ribonucleoside biosynthetic proce...	50	5	1.69	0.0259
14	GO:0009165	nucleotide biosynthetic process	88	7	2.97	0.0286
14	GO:1901293	nucleoside phosphate biosynthetic proces...	88	7	2.97	0.0286
14	GO:0008152	metabolic process	6254	224	210.93	0.0309
14	GO:0090407	organophosphate biosynthetic process	131	9	4.42	0.0327
14	GO:0009163	nucleoside biosynthetic process	55	5	1.85	0.0371
14	GO:0042455	ribonucleoside biosynthetic process	55	5	1.85	0.0371
14	GO:1901659	glycosyl compound biosynthetic process	55	5	1.85	0.0371
14	GO:0009142	nucleoside triphosphate biosynthetic pro...	38	4	1.28	0.038
14	GO:0009145	purine nucleoside triphosphate biosynthe...	38	4	1.28	0.038
14	GO:0009201	ribonucleoside triphosphate biosynthetic...	38	4	1.28	0.038
14	GO:0009206	purine ribonucleoside triphosphate biosy...	38	4	1.28	0.038
15	GO:0071804	cellular potassium ion transport	24	4	0.61	0.0028
15	GO:0071805	potassium ion transmembrane transport	24	4	0.61	0.0028
15	GO:0006629	lipid metabolic process	358	17	9.03	0.0089
15	GO:0016311	dephosphorylation	74	6	1.87	0.0107
15	GO:0044763	single-organism cellular process	2362	75	59.6	0.0112
15	GO:0071554	cell wall organization or biogenesis	79	6	1.99	0.0145
15	GO:0042545	cell wall modification	39	4	0.98	0.0162
15	GO:0006813	potassium ion transport	40	4	1.01	0.0177
15	GO:0006066	alcohol metabolic process	24	3	0.61	0.0217
15	GO:0071103	DNA conformation change	43	4	1.09	0.0226
15	GO:0019751	polyol metabolic process	10	2	0.25	0.025
15	GO:1901700	response to oxygen-containing compound	10	2	0.25	0.025
15	GO:0010035	response to inorganic substance	11	2	0.28	0.03
15	GO:0016458	gene silencing	11	2	0.28	0.03
15	GO:0031047	gene silencing by RNA	11	2	0.28	0.03
15	GO:0042559	pteridine-containing compound biosynthet...	11	2	0.28	0.03
15	GO:1901605	alpha-amino acid metabolic process	148	8	3.73	0.0335
15	GO:0006760	folic acid-containing compound metabolic...	12	2	0.3	0.0354
15	GO:0006334	nucleosome assembly	29	3	0.73	0.0357
15	GO:0031497	chromatin assembly	29	3	0.73	0.0357
15	GO:0034728	nucleosome organization	29	3	0.73	0.0357
15	GO:1901615	organic hydroxy compound metabolic proce...	30	3	0.76	0.039
15	GO:0006323	DNA packaging	31	3	0.78	0.0424
15	GO:0006333	chromatin assembly or disassembly	31	3	0.78	0.0424
15	GO:0015698	inorganic anion transport	31	3	0.78	0.0424
15	GO:0065004	protein-DNA complex assembly	31	3	0.78	0.0424
15	GO:0071824	protein-DNA complex subunit organization	31	3	0.78	0.0424
15	GO:0044248	cellular catabolic process	186	9	4.69	0.0457
15	GO:0006325	chromatin organization	54	4	1.36	0.0468
15	GO:0042558	pteridine-containing compound metabolic ...	14	2	0.35	0.0472
16	GO:0006575	cellular modified amino acid metabolic p...	33	4	0.83	0.0091
16	GO:0009607	response to biotic stimulus	20	3	0.5	0.0132
16	GO:0071554	cell wall organization or biogenesis	79	6	1.99	0.0145
16	GO:0042398	cellular modified amino acid biosyntheti...	21	3	0.53	0.0151
16	GO:0042545	cell wall modification	39	4	0.98	0.0162
16	GO:0006952	defense response	46	4	1.16	0.0281
16	GO:0009605	response to external stimulus	11	2	0.28	0.03
16	GO:0042559	pteridine-containing compound biosynthet...	11	2	0.28	0.03
16	GO:0006760	folic acid-containing compound metabolic...	12	2	0.3	0.0354
16	GO:0006026	aminoglycan catabolic process	14	2	0.35	0.0472
16	GO:0006030	chitin metabolic process	14	2	0.35	0.0472
16	GO:0006032	chitin catabolic process	14	2	0.35	0.0472
16	GO:0042558	pteridine-containing compound metabolic ...	14	2	0.35	0.0472
16	GO:0046348	amino sugar catabolic process	14	2	0.35	0.0472
16	GO:1901071	glucosamine-containing compound metaboli...	14	2	0.35	0.0472
16	GO:1901072	glucosamine-containing compound cataboli...	14	2	0.35	0.0472
17	GO:0006631	fatty acid metabolic process	71	7	1.34	0.00036
17	GO:0016054	organic acid catabolic process	27	4	0.51	0.00151
17	GO:0046395	carboxylic acid catabolic process	27	4	0.51	0.00151
17	GO:1901565	organonitrogen compound catabolic proces...	47	5	0.89	0.0018
17	GO:0030243	cellulose metabolic process	29	4	0.55	0.00199
17	GO:0030244	cellulose biosynthetic process	29	4	0.55	0.00199
17	GO:0006026	aminoglycan catabolic process	14	3	0.26	0.00205
17	GO:0006030	chitin metabolic process	14	3	0.26	0.00205
17	GO:0006032	chitin catabolic process	14	3	0.26	0.00205
17	GO:0046348	amino sugar catabolic process	14	3	0.26	0.00205
17	GO:1901071	glucosamine-containing compound metaboli...	14	3	0.26	0.00205
17	GO:1901072	glucosamine-containing compound cataboli...	14	3	0.26	0.00205
17	GO:0006040	amino sugar metabolic process	15	3	0.28	0.00252
17	GO:0006073	cellular glucan metabolic process	77	6	1.45	0.00319
17	GO:0044042	glucan metabolic process	77	6	1.45	0.00319
17	GO:0044264	cellular polysaccharide metabolic proces...	77	6	1.45	0.00319
17	GO:0044282	small molecule catabolic process	33	4	0.62	0.00324
17	GO:0071554	cell wall organization or biogenesis	79	6	1.49	0.00363
17	GO:0006022	aminoglycan metabolic process	17	3	0.32	0.00367
17	GO:0005976	polysaccharide metabolic process	87	6	1.64	0.00583
17	GO:0006633	fatty acid biosynthetic process	62	5	1.17	0.00606
17	GO:0051273	beta-glucan metabolic process	40	4	0.75	0.00653
17	GO:0051274	beta-glucan biosynthetic process	40	4	0.75	0.00653
17	GO:0072330	monocarboxylic acid biosynthetic process	67	5	1.26	0.00839
17	GO:1901136	carbohydrate derivative catabolic proces...	23	3	0.43	0.0088
17	GO:0009664	plant-type cell wall organization	26	3	0.49	0.0124
17	GO:0071669	plant-type cell wall organization or bio...	26	3	0.49	0.0124
17	GO:0032787	monocarboxylic acid metabolic process	136	7	2.56	0.01416
17	GO:0044242	cellular lipid catabolic process	10	2	0.19	0.01436
17	GO:0044255	cellular lipid metabolic process	209	9	3.94	0.01706
17	GO:0000271	polysaccharide biosynthetic process	54	4	1.02	0.01846
17	GO:0009250	glucan biosynthetic process	54	4	1.02	0.01846
17	GO:0033692	cellular polysaccharide biosynthetic pro...	54	4	1.02	0.01846
17	GO:0055114	oxidation-reduction process	1060	29	19.96	0.02324
17	GO:0044262	cellular carbohydrate metabolic process	126	6	2.37	0.03145
17	GO:0006629	lipid metabolic process	358	12	6.74	0.0374
17	GO:0016042	lipid catabolic process	17	2	0.32	0.03983
17	GO:1901606	alpha-amino acid catabolic process	19	2	0.36	0.04887
18	GO:0015914	phospholipid transport	13	3	0.24	0.0015
18	GO:0019725	cellular homeostasis	97	7	1.76	0.0018
18	GO:0065008	regulation of biological quality	128	8	2.32	0.0022
18	GO:0015748	organophosphate ester transport	16	3	0.29	0.0027
18	GO:0006869	lipid transport	43	4	0.78	0.0073
18	GO:0010876	lipid localization	43	4	0.78	0.0073
18	GO:0006979	response to oxidative stress	73	5	1.32	0.0102
18	GO:1902578	single-organism localization	860	23	15.56	0.0354
18	GO:0006099	tricarboxylic acid cycle	17	2	0.31	0.037
18	GO:0006101	citrate metabolic process	17	2	0.31	0.037
18	GO:0006284	base-excision repair	17	2	0.31	0.037
18	GO:0016226	iron-sulfur cluster assembly	17	2	0.31	0.037
18	GO:0031163	metallo-sulfur cluster assembly	17	2	0.31	0.037
18	GO:0009060	aerobic respiration	18	2	0.33	0.0412
18	GO:0071840	cellular component organization or bioge...	380	12	6.88	0.0423
18	GO:0044085	cellular component biogenesis	180	7	3.26	0.0446
18	GO:0051234	establishment of localization	1218	30	22.04	0.0451
18	GO:0044765	single-organism transport	842	22	15.24	0.0488
18	GO:0051179	localization	1227	30	22.2	0.0489
19	GO:0070838	divalent metal ion transport	40	5	0.62	0.00034
19	GO:0072511	divalent inorganic cation transport	40	5	0.62	0.00034
19	GO:0044765	single-organism transport	842	26	12.96	0.00038
19	GO:0006816	calcium ion transport	24	4	0.37	0.00045
19	GO:1902578	single-organism localization	860	26	13.23	0.00053
19	GO:0055085	transmembrane transport	540	19	8.31	0.00055
19	GO:0030001	metal ion transport	190	9	2.92	0.00257
19	GO:0006811	ion transport	374	13	5.75	0.00483
19	GO:0009067	aspartate family amino acid biosynthetic...	24	3	0.37	0.00568
19	GO:0006810	transport	1209	29	18.6	0.00852
19	GO:0009066	aspartate family amino acid metabolic pr...	28	3	0.43	0.0088
19	GO:0051234	establishment of localization	1218	29	18.74	0.00943
19	GO:0006812	cation transport	275	10	4.23	0.0097
19	GO:0044699	single-organism process	3618	69	55.67	0.01018
19	GO:0051179	localization	1227	29	18.88	0.01042
19	GO:0007034	vacuolar transport	14	2	0.22	0.01894
19	GO:0006468	protein phosphorylation	949	22	14.6	0.03151
19	GO:0016310	phosphorylation	1047	23	16.11	0.04771
19	GO:0010629	negative regulation of gene expression	23	2	0.35	0.04814
20	GO:0000097	sulfur amino acid biosynthetic process	22	3	0.33	0.0041
20	GO:0051188	cofactor biosynthetic process	73	5	1.1	0.0047
20	GO:0044272	sulfur compound biosynthetic process	48	4	0.72	0.0057
20	GO:0000096	sulfur amino acid metabolic process	25	3	0.38	0.006
20	GO:0009108	coenzyme biosynthetic process	51	4	0.77	0.007
20	GO:0009086	methionine biosynthetic process	11	2	0.17	0.0113
20	GO:0042559	pteridine-containing compound biosynthet...	11	2	0.17	0.0113
20	GO:0055114	oxidation-reduction process	1060	25	15.92	0.0135
20	GO:0009069	serine family amino acid metabolic proce...	35	3	0.53	0.0152
20	GO:0006555	methionine metabolic process	13	2	0.2	0.0157
20	GO:0072330	monocarboxylic acid biosynthetic process	67	4	1.01	0.0179
20	GO:0042558	pteridine-containing compound metabolic ...	14	2	0.21	0.0181
20	GO:0043094	cellular metabolic compound salvage	14	2	0.21	0.0181
20	GO:0008272	sulfate transport	15	2	0.23	0.0207
20	GO:0072348	sulfur compound transport	15	2	0.23	0.0207
20	GO:0016053	organic acid biosynthetic process	187	7	2.81	0.0223
20	GO:0046394	carboxylic acid biosynthetic process	187	7	2.81	0.0223
20	GO:1901605	alpha-amino acid metabolic process	148	6	2.22	0.0238
20	GO:0006544	glycine metabolic process	17	2	0.26	0.0263
20	GO:1901606	alpha-amino acid catabolic process	19	2	0.29	0.0324
20	GO:0009063	cellular amino acid catabolic process	21	2	0.32	0.039
20	GO:0044283	small molecule biosynthetic process	221	7	3.32	0.0484
20	GO:0006766	vitamin metabolic process	24	2	0.36	0.0498
20	GO:0006767	water-soluble vitamin metabolic process	24	2	0.36	0.0498
20	GO:0009067	aspartate family amino acid biosynthetic...	24	2	0.36	0.0498
21	GO:0006801	superoxide metabolic process	15	3	0.27	0.0022
21	GO:0072593	reactive oxygen species metabolic proces...	17	3	0.31	0.0032
21	GO:0006026	aminoglycan catabolic process	14	2	0.25	0.0253
21	GO:0006030	chitin metabolic process	14	2	0.25	0.0253
21	GO:0006032	chitin catabolic process	14	2	0.25	0.0253
21	GO:0046348	amino sugar catabolic process	14	2	0.25	0.0253
21	GO:1901071	glucosamine-containing compound metaboli...	14	2	0.25	0.0253
21	GO:1901072	glucosamine-containing compound cataboli...	14	2	0.25	0.0253
21	GO:0001522	pseudouridine synthesis	15	2	0.27	0.0289
21	GO:0006040	amino sugar metabolic process	15	2	0.27	0.0289
21	GO:0006022	aminoglycan metabolic process	17	2	0.31	0.0366
21	GO:0016569	covalent chromatin modification	19	2	0.34	0.0449
21	GO:0016570	histone modification	19	2	0.34	0.0449
21	GO:0006479	protein methylation	20	2	0.36	0.0493
21	GO:0008213	protein alkylation	20	2	0.36	0.0493
21	GO:0009607	response to biotic stimulus	20	2	0.36	0.0493
22	GO:0051641	cellular localization	261	10	3.15	0.0011
22	GO:1902600	hydrogen ion transmembrane transport	40	4	0.48	0.0013
22	GO:0015672	monovalent inorganic cation transport	102	6	1.23	0.0014
22	GO:0006818	hydrogen transport	47	4	0.57	0.0024
22	GO:0015992	proton transport	47	4	0.57	0.0024
22	GO:0051649	establishment of localization in cell	243	9	2.93	0.0026
22	GO:0007264	small GTPase mediated signal transductio...	90	5	1.09	0.0045
22	GO:0046907	intracellular transport	219	8	2.64	0.0048
22	GO:0045184	establishment of protein localization	220	8	2.65	0.005
22	GO:0008104	protein localization	228	8	2.75	0.0061
22	GO:0034613	cellular protein localization	191	7	2.3	0.0081
22	GO:0070727	cellular macromolecule localization	191	7	2.3	0.0081
22	GO:0015031	protein transport	211	7	2.55	0.0136
22	GO:0035556	intracellular signal transduction	170	6	2.05	0.0166
22	GO:0033036	macromolecule localization	272	8	3.28	0.0167
22	GO:0006886	intracellular protein transport	174	6	2.1	0.0184
22	GO:0015988	energy coupled proton transmembrane tran...	22	2	0.27	0.0284
22	GO:0015991	ATP hydrolysis coupled proton transport	22	2	0.27	0.0284
22	GO:0015985	energy coupled proton transport, down el...	23	2	0.28	0.0309
22	GO:0015986	ATP synthesis coupled proton transport	23	2	0.28	0.0309
22	GO:0051234	establishment of localization	1218	22	14.69	0.031
22	GO:0051179	localization	1227	22	14.8	0.0334
22	GO:0071702	organic substance transport	314	8	3.79	0.0354
22	GO:0098655	cation transmembrane transport	103	4	1.24	0.0356
22	GO:0098660	inorganic ion transmembrane transport	103	4	1.24	0.0356
22	GO:0098662	inorganic cation transmembrane transport	103	4	1.24	0.0356
23	GO:0006886	intracellular protein transport	174	8	2.1	0.0012
23	GO:0046907	intracellular transport	219	9	2.64	0.0013
23	GO:0071702	organic substance transport	314	11	3.79	0.0013
23	GO:0003333	amino acid transmembrane transport	20	3	0.24	0.0017
23	GO:0006865	amino acid transport	20	3	0.24	0.0017
23	GO:0098656	anion transmembrane transport	20	3	0.24	0.0017
23	GO:1903825	organic acid transmembrane transport	20	3	0.24	0.0017
23	GO:0034613	cellular protein localization	191	8	2.3	0.0021
23	GO:0070727	cellular macromolecule localization	191	8	2.3	0.0021
23	GO:0016482	cytoplasmic transport	76	5	0.92	0.0022
23	GO:0006913	nucleocytoplasmic transport	47	4	0.57	0.0024
23	GO:0051169	nuclear transport	47	4	0.57	0.0024
23	GO:0051649	establishment of localization in cell	243	9	2.93	0.0026
23	GO:0015031	protein transport	211	8	2.55	0.0039
23	GO:0051641	cellular localization	261	9	3.15	0.0041
23	GO:0045184	establishment of protein localization	220	8	2.65	0.005
23	GO:0008104	protein localization	228	8	2.75	0.0061
23	GO:0015849	organic acid transport	35	3	0.42	0.0084
23	GO:0046942	carboxylic acid transport	35	3	0.42	0.0084
23	GO:0033036	macromolecule localization	272	8	3.28	0.0167
23	GO:0006468	protein phosphorylation	949	19	11.45	0.0174
23	GO:0015711	organic anion transport	48	3	0.58	0.0199
23	GO:0006098	pentose-phosphate shunt	19	2	0.23	0.0216
23	GO:0051156	glucose 6-phosphate metabolic process	19	2	0.23	0.0216
23	GO:0007264	small GTPase mediated signal transductio...	90	4	1.09	0.0231
23	GO:0071705	nitrogen compound transport	51	3	0.62	0.0233
23	GO:0006006	glucose metabolic process	20	2	0.24	0.0238
23	GO:0019682	glyceraldehyde-3-phosphate metabolic pro...	21	2	0.25	0.0261
23	GO:0006739	NADP metabolic process	22	2	0.27	0.0284
23	GO:0016310	phosphorylation	1047	19	12.63	0.043
23	GO:0006464	cellular protein modification process	1207	21	14.56	0.0497
23	GO:0036211	protein modification process	1207	21	14.56	0.0497
24	GO:0006414	translational elongation	23	3	0.3	0.0032
24	GO:0007018	microtubule-based movement	72	4	0.94	0.0143
24	GO:0006928	movement of cell or subcellular componen...	75	4	0.98	0.0164
24	GO:0007017	microtubule-based process	114	5	1.49	0.0164
24	GO:0006739	NADP metabolic process	22	2	0.29	0.0329
24	GO:0030163	protein catabolic process	102	4	1.33	0.044
24	GO:0044249	cellular biosynthetic process	1922	33	25.08	0.0469
24	GO:0006633	fatty acid biosynthetic process	62	3	0.81	0.0469
25	GO:0016070	RNA metabolic process	1087	28	14.18	0.00024
25	GO:0046483	heterocycle metabolic process	1612	36	21.03	0.00042
25	GO:0090304	nucleic acid metabolic process	1252	30	16.34	0.00048
25	GO:0006139	nucleobase-containing compound metabolic...	1499	34	19.56	0.00049
25	GO:0034645	cellular macromolecule biosynthetic proc...	1453	32	18.96	0.0013
25	GO:0009059	macromolecule biosynthetic process	1454	32	18.97	0.00131
25	GO:0044249	cellular biosynthetic process	1922	39	25.08	0.00155
25	GO:1901576	organic substance biosynthetic process	1943	39	25.35	0.00192
25	GO:0006725	cellular aromatic compound metabolic pro...	1644	34	21.45	0.00261
25	GO:0010467	gene expression	1493	31	19.48	0.00409
25	GO:0042221	response to chemical	87	5	1.14	0.00545
25	GO:0009058	biosynthetic process	2062	39	26.9	0.00584
25	GO:0009719	response to endogenous stimulus	29	3	0.38	0.00617
25	GO:0009725	response to hormone	29	3	0.38	0.00617
25	GO:0010033	response to organic substance	29	3	0.38	0.00617
25	GO:0034641	cellular nitrogen compound metabolic pro...	2044	38	26.67	0.00896
25	GO:0006807	nitrogen compound metabolic process	2257	40	29.45	0.016
25	GO:0009108	coenzyme biosynthetic process	51	3	0.67	0.0286
25	GO:0042398	cellular modified amino acid biosyntheti...	21	2	0.27	0.03014
26	GO:0009067	aspartate family amino acid biosynthetic...	24	2	0.34	0.045
27	GO:0006979	response to oxidative stress	73	6	0.88	0.00023
27	GO:0006950	response to stress	292	11	3.52	0.00074
27	GO:0006952	defense response	46	3	0.55	0.01777
27	GO:0055114	oxidation-reduction process	1060	20	12.79	0.0264
27	GO:0005975	carbohydrate metabolic process	603	13	7.27	0.02853
27	GO:0050896	response to stimulus	721	14	8.7	0.04998
28	GO:0030243	cellulose metabolic process	29	3	0.3	0.0031
28	GO:0030244	cellulose biosynthetic process	29	3	0.3	0.0031
28	GO:0006835	dicarboxylic acid transport	12	2	0.12	0.0064
28	GO:0015740	C4-dicarboxylate transport	12	2	0.12	0.0064
28	GO:0015743	malate transport	12	2	0.12	0.0064
28	GO:0051273	beta-glucan metabolic process	40	3	0.41	0.0077
28	GO:0051274	beta-glucan biosynthetic process	40	3	0.41	0.0077
28	GO:0006073	cellular glucan metabolic process	77	4	0.79	0.0078
28	GO:0044042	glucan metabolic process	77	4	0.79	0.0078
28	GO:0044264	cellular polysaccharide metabolic proces...	77	4	0.79	0.0078
28	GO:0044262	cellular carbohydrate metabolic process	126	5	1.29	0.0092
28	GO:0005976	polysaccharide metabolic process	87	4	0.89	0.0119
28	GO:0006099	tricarboxylic acid cycle	17	2	0.17	0.0127
28	GO:0006101	citrate metabolic process	17	2	0.17	0.0127
28	GO:0009060	aerobic respiration	18	2	0.18	0.0142
28	GO:0000271	polysaccharide biosynthetic process	54	3	0.55	0.0175
28	GO:0009250	glucan biosynthetic process	54	3	0.55	0.0175
28	GO:0033692	cellular polysaccharide biosynthetic pro...	54	3	0.55	0.0175
28	GO:0005975	carbohydrate metabolic process	603	12	6.16	0.0188
28	GO:0072350	tricarboxylic acid metabolic process	22	2	0.22	0.0209
28	GO:0045229	external encapsulating structure organiz...	65	3	0.66	0.0285
28	GO:0071555	cell wall organization	65	3	0.66	0.0285
28	GO:0006811	ion transport	374	8	3.82	0.0366
28	GO:0030001	metal ion transport	190	5	1.94	0.0446
28	GO:0071554	cell wall organization or biogenesis	79	3	0.81	0.0467
28	GO:0034637	cellular carbohydrate biosynthetic proce...	80	3	0.82	0.0482
28	GO:0006486	protein glycosylation	35	2	0.36	0.0494
28	GO:0015849	organic acid transport	35	2	0.36	0.0494
28	GO:0043413	macromolecule glycosylation	35	2	0.36	0.0494
28	GO:0046942	carboxylic acid transport	35	2	0.36	0.0494
29	GO:0006629	lipid metabolic process	358	11	4.23	0.0032
29	GO:0006576	cellular biogenic amine metabolic proces...	38	3	0.45	0.01
29	GO:0044106	cellular amine metabolic process	38	3	0.45	0.01
29	GO:0044699	single-organism process	3618	54	42.75	0.0134
29	GO:0009309	amine biosynthetic process	19	2	0.22	0.0207
29	GO:0042401	cellular biogenic amine biosynthetic pro...	19	2	0.22	0.0207
29	GO:0000160	phosphorelay signal transduction system	58	3	0.69	0.0309
29	GO:0009308	amine metabolic process	58	3	0.69	0.0309
29	GO:1901615	organic hydroxy compound metabolic proce...	30	2	0.35	0.0485
30	GO:0006694	steroid biosynthetic process	13	3	0.14	0.00035
30	GO:0008202	steroid metabolic process	15	3	0.17	0.00054
30	GO:0007067	mitotic nuclear division	10	2	0.11	0.00516
30	GO:0000280	nuclear division	14	2	0.16	0.01013
30	GO:0055114	oxidation-reduction process	1060	20	11.74	0.01079
30	GO:0000278	mitotic cell cycle	16	2	0.18	0.01317
30	GO:1903047	mitotic cell cycle process	16	2	0.18	0.01317
30	GO:0006855	drug transmembrane transport	47	3	0.52	0.01501
30	GO:0015893	drug transport	47	3	0.52	0.01501
30	GO:0042493	response to drug	47	3	0.52	0.01501
30	GO:0048285	organelle fission	19	2	0.21	0.01836
30	GO:0008610	lipid biosynthetic process	162	5	1.79	0.03357
30	GO:1902589	single-organism organelle organization	64	3	0.71	0.03373
30	GO:0006629	lipid metabolic process	358	8	3.97	0.04426
31	GO:0044257	cellular protein catabolic process	90	5	0.95	0.0026
31	GO:0051603	proteolysis involved in cellular protein...	90	5	0.95	0.0026
31	GO:0030163	protein catabolic process	102	5	1.08	0.0044
31	GO:0044265	cellular macromolecule catabolic process	102	5	1.08	0.0044
31	GO:0050794	regulation of cellular process	1249	22	13.22	0.0093
31	GO:0044260	cellular macromolecule metabolic process	3124	44	33.07	0.0108
31	GO:0050789	regulation of biological process	1283	22	13.58	0.0127
31	GO:0018193	peptidyl-amino acid modification	48	3	0.51	0.0141
31	GO:0009057	macromolecule catabolic process	138	5	1.46	0.0153
31	GO:0065007	biological regulation	1311	22	13.88	0.0161
31	GO:0006996	organelle organization	155	5	1.64	0.024
31	GO:0009987	cellular process	5411	66	57.28	0.0268
31	GO:0006355	regulation of transcription, DNA-templat...	767	14	8.12	0.0297
31	GO:1903506	regulation of nucleic acid-templated tra...	767	14	8.12	0.0297
31	GO:2001141	regulation of RNA biosynthetic process	767	14	8.12	0.0297
31	GO:1902589	single-organism organelle organization	64	3	0.68	0.03
31	GO:0051252	regulation of RNA metabolic process	769	14	8.14	0.0303
31	GO:0019219	regulation of nucleobase-containing comp...	774	14	8.19	0.0318
31	GO:0009889	regulation of biosynthetic process	778	14	8.24	0.033
31	GO:0010556	regulation of macromolecule biosynthetic...	778	14	8.24	0.033
31	GO:0031326	regulation of cellular biosynthetic proc...	778	14	8.24	0.033
31	GO:2000112	regulation of cellular macromolecule bio...	778	14	8.24	0.033
31	GO:0051171	regulation of nitrogen compound metaboli...	782	14	8.28	0.0343
31	GO:0010468	regulation of gene expression	791	14	8.37	0.0373
31	GO:0043170	macromolecule metabolic process	3448	45	36.5	0.0403
31	GO:0080090	regulation of primary metabolic process	801	14	8.48	0.0408
31	GO:0031323	regulation of cellular metabolic process	802	14	8.49	0.0412
31	GO:0006511	ubiquitin-dependent protein catabolic pr...	73	3	0.77	0.0419
31	GO:0019941	modification-dependent protein catabolic...	73	3	0.77	0.0419
31	GO:0043632	modification-dependent macromolecule cat...	73	3	0.77	0.0419
31	GO:0006323	DNA packaging	31	2	0.33	0.0422
31	GO:0051716	cellular response to stimulus	445	9	4.71	0.045
31	GO:0044248	cellular catabolic process	186	5	1.97	0.0469
31	GO:0044237	cellular metabolic process	4137	52	43.79	0.047
31	GO:0060255	regulation of macromolecule metabolic pr...	817	14	8.65	0.047
31	GO:0000413	protein peptidyl-prolyl isomerization	33	2	0.35	0.0473
31	GO:0018208	peptidyl-proline modification	33	2	0.35	0.0473
31	GO:0019222	regulation of metabolic process	823	14	8.71	0.0495
32	GO:0007017	microtubule-based process	114	5	1.04	0.0037
32	GO:0009966	regulation of signal transduction	48	3	0.44	0.0094
32	GO:0010646	regulation of cell communication	48	3	0.44	0.0094
32	GO:0023051	regulation of signaling	48	3	0.44	0.0094
32	GO:0048583	regulation of response to stimulus	59	3	0.54	0.0164
32	GO:0005975	carbohydrate metabolic process	603	11	5.49	0.0198
32	GO:0051258	protein polymerization	27	2	0.25	0.0248
32	GO:0007018	microtubule-based movement	72	3	0.66	0.0276
32	GO:0006928	movement of cell or subcellular componen...	75	3	0.68	0.0307
32	GO:1901135	carbohydrate derivative metabolic proces...	274	6	2.5	0.0382
32	GO:0006486	protein glycosylation	35	2	0.32	0.0401
32	GO:0043413	macromolecule glycosylation	35	2	0.32	0.0401
32	GO:0022402	cell cycle process	36	2	0.33	0.0423
32	GO:0045333	cellular respiration	36	2	0.33	0.0423
32	GO:0006461	protein complex assembly	86	3	0.78	0.0434
32	GO:0070271	protein complex biogenesis	86	3	0.78	0.0434
32	GO:0009100	glycoprotein metabolic process	38	2	0.35	0.0466
32	GO:0009101	glycoprotein biosynthetic process	38	2	0.35	0.0466
33	GO:0042545	cell wall modification	39	2	0.3	0.035
33	GO:0008033	tRNA processing	40	2	0.31	0.037
33	GO:0006796	phosphate-containing compound metabolic ...	1330	16	10.15	0.038
33	GO:0006793	phosphorus metabolic process	1332	16	10.17	0.039
33	GO:0006869	lipid transport	43	2	0.33	0.042
33	GO:0010876	lipid localization	43	2	0.33	0.042
33	GO:0043412	macromolecule modification	1252	15	9.55	0.046
34	GO:0055114	oxidation-reduction process	1060	24	10.96	0.00012
34	GO:0009116	nucleoside metabolic process	149	8	1.54	0.00014
34	GO:0072521	purine-containing compound metabolic pro...	149	8	1.54	0.00014
34	GO:1901657	glycosyl compound metabolic process	149	8	1.54	0.00014
34	GO:0019693	ribose phosphate metabolic process	151	8	1.56	0.00016
34	GO:0009117	nucleotide metabolic process	191	8	1.97	0.00076
34	GO:0006753	nucleoside phosphate metabolic process	195	8	2.02	0.00087
34	GO:0015985	energy coupled proton transport, down el...	23	3	0.24	0.00163
34	GO:0015986	ATP synthesis coupled proton transport	23	3	0.24	0.00163
34	GO:0071705	nitrogen compound transport	51	4	0.53	0.00184
34	GO:0055086	nucleobase-containing small molecule met...	229	8	2.37	0.00243
34	GO:0006754	ATP biosynthetic process	31	3	0.32	0.00389
34	GO:1901564	organonitrogen compound metabolic proces...	997	19	10.31	0.00552
34	GO:0009142	nucleoside triphosphate biosynthetic pro...	38	3	0.39	0.00693
34	GO:0009145	purine nucleoside triphosphate biosynthe...	38	3	0.39	0.00693
34	GO:0009201	ribonucleoside triphosphate biosynthetic...	38	3	0.39	0.00693
34	GO:0009206	purine ribonucleoside triphosphate biosy...	38	3	0.39	0.00693
34	GO:1901135	carbohydrate derivative metabolic proces...	274	8	2.83	0.00718
34	GO:1902600	hydrogen ion transmembrane transport	40	3	0.41	0.008
34	GO:0016567	protein ubiquitination	77	4	0.8	0.00812
34	GO:0044710	single-organism metabolic process	2091	32	21.62	0.00824
34	GO:0032446	protein modification by small protein co...	79	4	0.82	0.00888
34	GO:0044237	cellular metabolic process	4137	54	42.78	0.00898
34	GO:0009127	purine nucleoside monophosphate biosynth...	42	3	0.43	0.00916
34	GO:0009168	purine ribonucleoside monophosphate bios...	42	3	0.43	0.00916
34	GO:0070647	protein modification by small protein co...	80	4	0.83	0.00927
34	GO:0019637	organophosphate metabolic process	297	8	3.07	0.01139
34	GO:0006818	hydrogen transport	47	3	0.49	0.01247
34	GO:0009156	ribonucleoside monophosphate biosyntheti...	47	3	0.49	0.01247
34	GO:0015992	proton transport	47	3	0.49	0.01247
34	GO:0009124	nucleoside monophosphate biosynthetic pr...	49	3	0.51	0.01396
34	GO:0006412	translation	436	10	4.51	0.01402
34	GO:0042451	purine nucleoside biosynthetic process	50	3	0.52	0.01474
34	GO:0046129	purine ribonucleoside biosynthetic proce...	50	3	0.52	0.01474
34	GO:0043043	peptide biosynthetic process	441	10	4.56	0.01509
34	GO:0008152	metabolic process	6254	73	64.66	0.01636
34	GO:0009152	purine ribonucleotide biosynthetic proce...	53	3	0.55	0.01723
34	GO:0006518	peptide metabolic process	453	10	4.68	0.0179
34	GO:1901566	organonitrogen compound biosynthetic pro...	736	14	7.61	0.01794
34	GO:0043604	amide biosynthetic process	454	10	4.69	0.01815
34	GO:0009163	nucleoside biosynthetic process	55	3	0.57	0.01902
34	GO:0042455	ribonucleoside biosynthetic process	55	3	0.57	0.01902
34	GO:1901659	glycosyl compound biosynthetic process	55	3	0.57	0.01902
34	GO:0009260	ribonucleotide biosynthetic process	56	3	0.58	0.01995
34	GO:0046390	ribose phosphate biosynthetic process	56	3	0.58	0.01995
34	GO:0006164	purine nucleotide biosynthetic process	57	3	0.59	0.0209
34	GO:0043603	cellular amide metabolic process	475	10	4.91	0.02404
34	GO:0072522	purine-containing compound biosynthetic ...	70	3	0.72	0.03556
35	GO:0009072	aromatic amino acid family metabolic pro...	42	2	0.34	0.045
36	GO:0006397	mRNA processing	42	3	0.24	0.0018
36	GO:0006396	RNA processing	165	5	0.95	0.0025
36	GO:0016071	mRNA metabolic process	49	3	0.28	0.0028
36	GO:0032268	regulation of cellular protein metabolic...	25	2	0.14	0.009
36	GO:0006399	tRNA metabolic process	76	3	0.44	0.0095
36	GO:0051246	regulation of protein metabolic process	27	2	0.16	0.0105
36	GO:0006644	phospholipid metabolic process	80	3	0.46	0.0109
36	GO:0009066	aspartate family amino acid metabolic pr...	28	2	0.16	0.0113
36	GO:0008654	phospholipid biosynthetic process	33	2	0.19	0.0154
36	GO:0034660	ncRNA metabolic process	102	3	0.59	0.0209
36	GO:0044238	primary metabolic process	4619	34	26.72	0.0209
36	GO:0008033	tRNA processing	40	2	0.23	0.0222
36	GO:0046488	phosphatidylinositol metabolic process	45	2	0.26	0.0277
36	GO:0006470	protein dephosphorylation	54	2	0.31	0.0387
36	GO:0016070	RNA metabolic process	1087	11	6.29	0.0424
36	GO:0071704	organic substance metabolic process	4810	34	27.83	0.0434
36	GO:0006650	glycerophospholipid metabolic process	60	2	0.35	0.0469
37	GO:0006720	isoprenoid metabolic process	40	2	0.16	0.011
37	GO:0008299	isoprenoid biosynthetic process	40	2	0.16	0.011
37	GO:0044255	cellular lipid metabolic process	209	3	0.82	0.048
38	GO:1901137	carbohydrate derivative biosynthetic pro...	126	3	0.42	0.0081
38	GO:0009152	purine ribonucleotide biosynthetic proce...	53	2	0.18	0.0132
38	GO:0009260	ribonucleotide biosynthetic process	56	2	0.19	0.0147
38	GO:0046390	ribose phosphate biosynthetic process	56	2	0.19	0.0147
38	GO:0006164	purine nucleotide biosynthetic process	57	2	0.19	0.0152
38	GO:0006886	intracellular protein transport	174	3	0.58	0.0194
38	GO:0072522	purine-containing compound biosynthetic ...	70	2	0.23	0.0224
38	GO:0034613	cellular protein localization	191	3	0.63	0.0247
38	GO:0070727	cellular macromolecule localization	191	3	0.63	0.0247
38	GO:0015031	protein transport	211	3	0.7	0.0319
38	GO:0000079	regulation of cyclin-dependent protein s...	10	1	0.03	0.0328
38	GO:0006188	IMP biosynthetic process	10	1	0.03	0.0328
38	GO:0015936	coenzyme A metabolic process	10	1	0.03	0.0328
38	GO:0043549	regulation of kinase activity	10	1	0.03	0.0328
38	GO:0045859	regulation of protein kinase activity	10	1	0.03	0.0328
38	GO:0046040	IMP metabolic process	10	1	0.03	0.0328
38	GO:0071900	regulation of protein serine/threonine k...	10	1	0.03	0.0328
38	GO:1904029	regulation of cyclin-dependent protein k...	10	1	0.03	0.0328
38	GO:0009165	nucleotide biosynthetic process	88	2	0.29	0.0342
38	GO:1901293	nucleoside phosphate biosynthetic proces...	88	2	0.29	0.0342
38	GO:0046907	intracellular transport	219	3	0.73	0.0351
38	GO:0045184	establishment of protein localization	220	3	0.73	0.0355
38	GO:0044257	cellular protein catabolic process	90	2	0.3	0.0356
38	GO:0051603	proteolysis involved in cellular protein...	90	2	0.3	0.0356
38	GO:0001932	regulation of protein phosphorylation	11	1	0.04	0.036
38	GO:0042325	regulation of phosphorylation	11	1	0.04	0.036
38	GO:0008104	protein localization	228	3	0.76	0.0389
38	GO:0019220	regulation of phosphate metabolic proces...	12	1	0.04	0.0392
38	GO:0051174	regulation of phosphorus metabolic proce...	12	1	0.04	0.0392
38	GO:0033865	nucleoside bisphosphate metabolic proces...	13	1	0.04	0.0424
38	GO:0033875	ribonucleoside bisphosphate metabolic pr...	13	1	0.04	0.0424
38	GO:0034032	purine nucleoside bisphosphate metabolic...	13	1	0.04	0.0424
38	GO:0051338	regulation of transferase activity	13	1	0.04	0.0424
38	GO:0030163	protein catabolic process	102	2	0.34	0.0447
38	GO:0044265	cellular macromolecule catabolic process	102	2	0.34	0.0447
38	GO:0051649	establishment of localization in cell	243	3	0.81	0.0456
38	GO:0008272	sulfate transport	15	1	0.05	0.0488
38	GO:0031399	regulation of protein modification proce...	15	1	0.05	0.0488
38	GO:0072348	sulfur compound transport	15	1	0.05	0.0488

## Sheet: Module core GO enrichment
mod_core	GO.ID	Term	Annotated	Significant	Expected	p.value
1	GO:0009072	aromatic amino acid family metabolic process	42	9	0.45	4.1e-10
1	GO:0009073	aromatic amino acid family biosynthetic process	25	7	0.27	5.2e-09
1	GO:0008652	cellular amino acid biosynthetic process	120	8	1.29	4e-05
1	GO:0019752	carboxylic acid metabolic process	421	14	4.51	0.00014
1	GO:0043436	oxoacid metabolic process	426	14	4.56	0.00015
1	GO:0006082	organic acid metabolic process	427	14	4.57	0.00016
1	GO:0006520	cellular amino acid metabolic process	244	10	2.61	0.00026
1	GO:0016053	organic acid biosynthetic process	187	8	2	0.00084
1	GO:0046394	carboxylic acid biosynthetic process	187	8	2	0.00084
1	GO:0044710	single-organism metabolic process	2091	35	22.39	0.00207
1	GO:0042221	response to chemical	87	5	0.93	0.00233
1	GO:0044283	small molecule biosynthetic process	221	8	2.37	0.00244
1	GO:0044281	small molecule metabolic process	715	16	7.66	0.00343
1	GO:0055114	oxidation-reduction process	1060	20	11.35	0.00735
1	GO:0006855	drug transmembrane transport	47	3	0.5	0.0137
1	GO:0015893	drug transport	47	3	0.5	0.0137
1	GO:0042493	response to drug	47	3	0.5	0.0137
1	GO:1901606	alpha-amino acid catabolic process	19	2	0.2	0.01723
1	GO:0009063	cellular amino acid catabolic process	21	2	0.22	0.02086
1	GO:1901605	alpha-amino acid metabolic process	148	5	1.58	0.021
1	GO:1901362	organic cyclic compound biosynthetic process	1099	19	11.77	0.02174
1	GO:0044711	single-organism biosynthetic process	527	11	5.64	0.0244
1	GO:0019438	aromatic compound biosynthetic process	1055	18	11.3	0.02876
1	GO:0016054	organic acid catabolic process	27	2	0.29	0.03346
1	GO:0046395	carboxylic acid catabolic process	27	2	0.29	0.03346
1	GO:0009719	response to endogenous stimulus	29	2	0.31	0.03818
1	GO:0009725	response to hormone	29	2	0.31	0.03818
1	GO:0010033	response to organic substance	29	2	0.31	0.03818
1	GO:0044282	small molecule catabolic process	33	2	0.35	0.04831
2	GO:0005992	trehalose biosynthetic process	21	3	0.16	0.00054
2	GO:0005991	trehalose metabolic process	23	3	0.18	0.0007
2	GO:0046351	disaccharide biosynthetic process	24	3	0.19	0.0008
2	GO:0009312	oligosaccharide biosynthetic process	26	3	0.2	0.00102
2	GO:0005975	carbohydrate metabolic process	603	12	4.68	0.00201
2	GO:0005984	disaccharide metabolic process	36	3	0.28	0.00264
2	GO:0009311	oligosaccharide metabolic process	39	3	0.3	0.00333
2	GO:0006221	pyrimidine nucleotide biosynthetic process	22	2	0.17	0.01237
2	GO:0006220	pyrimidine nucleotide metabolic process	23	2	0.18	0.01348
2	GO:0034637	cellular carbohydrate biosynthetic process	80	3	0.62	0.02392
2	GO:0016051	carbohydrate biosynthetic process	85	3	0.66	0.02799
2	GO:0072528	pyrimidine-containing compound biosynthetic process	35	2	0.27	0.02989
2	GO:0072527	pyrimidine-containing compound metabolic process	38	2	0.29	0.03479
2	GO:0046488	phosphatidylinositol metabolic process	45	2	0.35	0.04734
2	GO:0044711	single-organism biosynthetic process	527	8	4.09	0.04964
3	GO:0006518	peptide metabolic process	453	23	2.12	6.1e-20
3	GO:0043603	cellular amide metabolic process	475	23	2.22	1.8e-19
3	GO:0006412	translation	436	22	2.04	6.8e-19
3	GO:0043043	peptide biosynthetic process	441	22	2.06	8.7e-19
3	GO:0043604	amide biosynthetic process	454	22	2.12	1.6e-18
3	GO:1901566	organonitrogen compound biosynthetic process	736	22	3.44	4.6e-14
3	GO:0010467	gene expression	1493	27	6.98	1.6e-12
3	GO:1901564	organonitrogen compound metabolic process	997	23	4.66	2.2e-12
3	GO:0034645	cellular macromolecule biosynthetic process	1453	26	6.8	8.9e-12
3	GO:0009059	macromolecule biosynthetic process	1454	26	6.8	9e-12
3	GO:0044271	cellular nitrogen compound biosynthetic process	1500	26	7.02	1.9e-11
3	GO:0034641	cellular nitrogen compound metabolic process	2044	27	9.56	3.4e-09
3	GO:0044249	cellular biosynthetic process	1922	26	8.99	5.9e-09
3	GO:1901576	organic substance biosynthetic process	1943	26	9.09	7.5e-09
3	GO:0009058	biosynthetic process	2062	26	9.65	2.9e-08
3	GO:0006807	nitrogen compound metabolic process	2257	27	10.56	3.5e-08
3	GO:0044267	cellular protein metabolic process	1840	24	8.61	9.7e-08
3	GO:0019538	protein metabolic process	2140	25	10.01	3.8e-07
3	GO:0006334	nucleosome assembly	29	4	0.14	8.9e-06
3	GO:0031497	chromatin assembly	29	4	0.14	8.9e-06
3	GO:0034728	nucleosome organization	29	4	0.14	8.9e-06
3	GO:0044260	cellular macromolecule metabolic process	3124	28	14.61	1.1e-05
3	GO:0006323	DNA packaging	31	4	0.15	1.2e-05
3	GO:0006333	chromatin assembly or disassembly	31	4	0.15	1.2e-05
3	GO:0065004	protein-DNA complex assembly	31	4	0.15	1.2e-05
3	GO:0071824	protein-DNA complex subunit organization	31	4	0.15	1.2e-05
3	GO:0043170	macromolecule metabolic process	3448	29	16.13	2.2e-05
3	GO:0071103	DNA conformation change	43	4	0.2	4.4e-05
3	GO:0006325	chromatin organization	54	4	0.25	0.00011
3	GO:0006414	translational elongation	23	3	0.11	0.00016
3	GO:0006461	protein complex assembly	86	4	0.4	0.00066
3	GO:0051276	chromosome organization	86	4	0.4	0.00066
3	GO:0070271	protein complex biogenesis	86	4	0.4	0.00066
3	GO:0034622	cellular macromolecular complex assembly	87	4	0.41	0.00069
3	GO:0065003	macromolecular complex assembly	95	4	0.44	0.00096
3	GO:0071822	protein complex subunit organization	99	4	0.46	0.00111
3	GO:0044237	cellular metabolic process	4137	29	19.35	0.00118
3	GO:0022607	cellular component assembly	124	4	0.58	0.00256
3	GO:0043933	macromolecular complex subunit organization	133	4	0.62	0.00329
3	GO:0006996	organelle organization	155	4	0.73	0.00568
3	GO:0044085	cellular component biogenesis	180	4	0.84	0.00956
3	GO:0044238	primary metabolic process	4619	29	21.61	0.01018
3	GO:0009987	cellular process	5411	32	25.31	0.01274
3	GO:0046907	intracellular transport	219	4	1.02	0.01852
3	GO:0071704	organic substance metabolic process	4810	29	22.5	0.02107
3	GO:0051649	establishment of localization in cell	243	4	1.14	0.02599
3	GO:0051641	cellular localization	261	4	1.22	0.03265
3	GO:0006886	intracellular protein transport	174	3	0.81	0.04714
4	GO:0009628	response to abiotic stimulus	18	4	0.1	2.4e-06
4	GO:0000160	phosphorelay signal transduction system	58	5	0.32	1.5e-05
4	GO:0050896	response to stimulus	721	13	3.99	9.5e-05
4	GO:1901700	response to oxygen-containing compound	10	2	0.06	0.0013
4	GO:0010035	response to inorganic substance	11	2	0.06	0.0016
4	GO:0007275	multicellular organismal development	13	2	0.07	0.0023
4	GO:0044707	single-multicellular organism process	13	2	0.07	0.0023
4	GO:0035556	intracellular signal transduction	170	5	0.94	0.0023
4	GO:0032502	developmental process	19	2	0.11	0.0048
4	GO:0044767	single-organism developmental process	19	2	0.11	0.0048
4	GO:0009110	vitamin biosynthetic process	23	2	0.13	0.007
4	GO:0042364	water-soluble vitamin biosynthetic process	23	2	0.13	0.007
4	GO:0050789	regulation of biological process	1283	14	7.11	0.0075
4	GO:0006766	vitamin metabolic process	24	2	0.13	0.0077
4	GO:0006767	water-soluble vitamin metabolic process	24	2	0.13	0.0077
4	GO:0065007	biological regulation	1311	14	7.26	0.0091
4	GO:0007165	signal transduction	349	6	1.93	0.0119
4	GO:0023052	signaling	349	6	1.93	0.0119
4	GO:0044700	single organism signaling	349	6	1.93	0.0119
4	GO:0006352	DNA-templated transcription, initiation	34	2	0.19	0.015
4	GO:0072528	pyrimidine-containing compound biosynthetic process	35	2	0.19	0.0159
4	GO:0005975	carbohydrate metabolic process	603	8	3.34	0.0164
4	GO:0006576	cellular biogenic amine metabolic process	38	2	0.21	0.0186
4	GO:0044106	cellular amine metabolic process	38	2	0.21	0.0186
4	GO:0072527	pyrimidine-containing compound metabolic process	38	2	0.21	0.0186
4	GO:0006950	response to stress	292	5	1.62	0.0219
4	GO:0044272	sulfur compound biosynthetic process	48	2	0.27	0.0288
4	GO:0007154	cell communication	429	6	2.38	0.0298
4	GO:0051716	cellular response to stimulus	445	6	2.46	0.0347
4	GO:0050794	regulation of cellular process	1249	12	6.92	0.0353
4	GO:0009308	amine metabolic process	58	2	0.32	0.0408
4	GO:0048583	regulation of response to stimulus	59	2	0.33	0.0421
5	GO:0006355	regulation of transcription, DNA-templated	767	19	3.87	8.9e-10
5	GO:1903506	regulation of nucleic acid-templated transcription	767	19	3.87	8.9e-10
5	GO:2001141	regulation of RNA biosynthetic process	767	19	3.87	8.9e-10
5	GO:0051252	regulation of RNA metabolic process	769	19	3.88	9.3e-10
5	GO:0019219	regulation of nucleobase-containing compound metabolic process	774	19	3.91	1e-09
5	GO:0009889	regulation of biosynthetic process	778	19	3.93	1.1e-09
5	GO:0010556	regulation of macromolecule biosynthetic process	778	19	3.93	1.1e-09
5	GO:0031326	regulation of cellular biosynthetic process	778	19	3.93	1.1e-09
5	GO:2000112	regulation of cellular macromolecule biosynthetic process	778	19	3.93	1.1e-09
5	GO:0051171	regulation of nitrogen compound metabolic process	782	19	3.95	1.2e-09
5	GO:0010468	regulation of gene expression	791	19	3.99	1.5e-09
5	GO:0080090	regulation of primary metabolic process	801	19	4.04	1.9e-09
5	GO:0031323	regulation of cellular metabolic process	802	19	4.05	1.9e-09
5	GO:0060255	regulation of macromolecule metabolic process	817	19	4.12	2.6e-09
5	GO:0019222	regulation of metabolic process	823	19	4.15	2.9e-09
5	GO:0006351	transcription, DNA-templated	865	19	4.37	6.8e-09
5	GO:0032774	RNA biosynthetic process	865	19	4.37	6.8e-09
5	GO:0097659	nucleic acid-templated transcription	865	19	4.37	6.8e-09
5	GO:0044260	cellular macromolecule metabolic process	3124	33	15.77	4.3e-08
5	GO:0034654	nucleobase-containing compound biosynthetic process	968	19	4.89	4.4e-08
5	GO:0019438	aromatic compound biosynthetic process	1055	19	5.32	1.8e-07
5	GO:0018130	heterocycle biosynthetic process	1068	19	5.39	2.2e-07
5	GO:0016070	RNA metabolic process	1087	19	5.49	2.9e-07
5	GO:1901362	organic cyclic compound biosynthetic process	1099	19	5.55	3.4e-07
5	GO:0050794	regulation of cellular process	1249	20	6.3	4.9e-07
5	GO:0043170	macromolecule metabolic process	3448	33	17.4	6.8e-07
5	GO:0050789	regulation of biological process	1283	20	6.48	7.7e-07
5	GO:0065007	biological regulation	1311	20	6.62	1.1e-06
5	GO:0034645	cellular macromolecule biosynthetic process	1453	21	7.33	1.2e-06
5	GO:0009059	macromolecule biosynthetic process	1454	21	7.34	1.2e-06
5	GO:0090304	nucleic acid metabolic process	1252	19	6.32	2.6e-06
5	GO:0010467	gene expression	1493	20	7.53	8.8e-06
5	GO:0044271	cellular nitrogen compound biosynthetic process	1500	20	7.57	9.5e-06
5	GO:0006139	nucleobase-containing compound metabolic process	1499	19	7.57	3.9e-05
5	GO:0044237	cellular metabolic process	4137	33	20.88	8.6e-05
5	GO:0044238	primary metabolic process	4619	35	23.31	9.3e-05
5	GO:0009058	biosynthetic process	2062	22	10.41	9.8e-05
5	GO:0046483	heterocycle metabolic process	1612	19	8.14	0.00011
5	GO:0044249	cellular biosynthetic process	1922	21	9.7	0.00011
5	GO:1901576	organic substance biosynthetic process	1943	21	9.81	0.00014
5	GO:0006725	cellular aromatic compound metabolic process	1644	19	8.3	0.00015
5	GO:1901360	organic cyclic compound metabolic process	1676	19	8.46	0.00019
5	GO:0071704	organic substance metabolic process	4810	35	24.27	0.00028
5	GO:0016567	protein ubiquitination	77	4	0.39	0.00058
5	GO:0032446	protein modification by small protein conjugation	79	4	0.4	0.00064
5	GO:0070647	protein modification by small protein conjugation or removal	80	4	0.4	0.00067
5	GO:0034641	cellular nitrogen compound metabolic process	2044	20	10.32	0.00091
5	GO:0006839	mitochondrial transport	12	2	0.06	0.00159
5	GO:0006807	nitrogen compound metabolic process	2257	20	11.39	0.00335
5	GO:0006887	exocytosis	23	2	0.12	0.00588
5	GO:0009987	cellular process	5411	35	27.31	0.00589
5	GO:0032940	secretion by cell	24	2	0.12	0.00639
5	GO:0046903	secretion	24	2	0.12	0.00639
5	GO:0006464	cellular protein modification process	1207	11	6.09	0.03302
5	GO:0036211	protein modification process	1207	11	6.09	0.03302
5	GO:0051649	establishment of localization in cell	243	4	1.23	0.03328
5	GO:0051641	cellular localization	261	4	1.32	0.0416
5	GO:0043412	macromolecule modification	1252	11	6.32	0.04181
5	GO:0000003	reproduction	10	1	0.05	0.04936
6	GO:0015031	protein transport	211	5	0.94	0.0022
6	GO:0016192	vesicle-mediated transport	126	4	0.56	0.0022
6	GO:0046907	intracellular transport	219	5	0.97	0.0026
6	GO:0045184	establishment of protein localization	220	5	0.97	0.0026
6	GO:0008104	protein localization	228	5	1.01	0.0031
6	GO:0006511	ubiquitin-dependent protein catabolic process	73	3	0.32	0.004
6	GO:0019941	modification-dependent protein catabolic process	73	3	0.32	0.004
6	GO:0043632	modification-dependent macromolecule catabolic process	73	3	0.32	0.004
6	GO:0051649	establishment of localization in cell	243	5	1.08	0.0041
6	GO:1902582	single-organism intracellular transport	75	3	0.33	0.0043
6	GO:0051641	cellular localization	261	5	1.16	0.0055
6	GO:0006508	proteolysis	374	6	1.66	0.0055
6	GO:0033036	macromolecule localization	272	5	1.21	0.0065
6	GO:0006886	intracellular protein transport	174	4	0.77	0.007
6	GO:0044257	cellular protein catabolic process	90	3	0.4	0.0072
6	GO:0051603	proteolysis involved in cellular protein catabolic process	90	3	0.4	0.0072
6	GO:0034613	cellular protein localization	191	4	0.85	0.0097
6	GO:0070727	cellular macromolecule localization	191	4	0.85	0.0097
6	GO:0030163	protein catabolic process	102	3	0.45	0.0102
6	GO:0044265	cellular macromolecule catabolic process	102	3	0.45	0.0102
6	GO:0071702	organic substance transport	314	5	1.39	0.0118
6	GO:0009057	macromolecule catabolic process	138	3	0.61	0.0228
6	GO:1901575	organic substance catabolic process	273	4	1.21	0.0316
6	GO:0006810	transport	1209	10	5.36	0.0332
6	GO:0009056	catabolic process	278	4	1.23	0.0335
6	GO:0051234	establishment of localization	1218	10	5.4	0.0347
6	GO:0051179	localization	1227	10	5.44	0.0363
6	GO:0016482	cytoplasmic transport	76	2	0.34	0.0443
6	GO:0006888	ER to Golgi vesicle-mediated transport	11	1	0.05	0.0477
6	GO:0017038	protein import	11	1	0.05	0.0477
6	GO:0044248	cellular catabolic process	186	3	0.82	0.0485
7	GO:0044723	single-organism carbohydrate metabolic process	247	9	1.28	3.6e-06
7	GO:0044710	single-organism metabolic process	2091	25	10.81	3.6e-06
7	GO:0005975	carbohydrate metabolic process	603	12	3.12	3.5e-05
7	GO:0055114	oxidation-reduction process	1060	16	5.48	3.8e-05
7	GO:0044699	single-organism process	3618	31	18.7	0.00011
7	GO:0006096	glycolytic process	52	4	0.27	0.00014
7	GO:0006757	ATP generation from ADP	52	4	0.27	0.00014
7	GO:0009135	purine nucleoside diphosphate metabolic process	52	4	0.27	0.00014
7	GO:0009179	purine ribonucleoside diphosphate metabolic process	52	4	0.27	0.00014
7	GO:0009185	ribonucleoside diphosphate metabolic process	52	4	0.27	0.00014
7	GO:0046031	ADP metabolic process	52	4	0.27	0.00014
7	GO:0006090	pyruvate metabolic process	55	4	0.28	0.00017
7	GO:0044724	single-organism carbohydrate catabolic process	57	4	0.29	0.0002
7	GO:0006165	nucleoside diphosphate phosphorylation	59	4	0.31	0.00023
7	GO:0046939	nucleotide phosphorylation	59	4	0.31	0.00023
7	GO:0019752	carboxylic acid metabolic process	421	9	2.18	0.00024
7	GO:0009132	nucleoside diphosphate metabolic process	61	4	0.32	0.00026
7	GO:0043436	oxoacid metabolic process	426	9	2.2	0.00026
7	GO:0006082	organic acid metabolic process	427	9	2.21	0.00027
7	GO:0016052	carbohydrate catabolic process	67	4	0.35	0.00037
7	GO:0006091	generation of precursor metabolites and energy	123	5	0.64	0.0004
7	GO:0009719	response to endogenous stimulus	29	3	0.15	0.00043
7	GO:0009725	response to hormone	29	3	0.15	0.00043
7	GO:0010033	response to organic substance	29	3	0.15	0.00043
7	GO:0044712	single-organism catabolic process	135	5	0.7	0.00061
7	GO:0032787	monocarboxylic acid metabolic process	136	5	0.7	0.00063
7	GO:0019362	pyridine nucleotide metabolic process	80	4	0.41	0.00073
7	GO:0046496	nicotinamide nucleotide metabolic process	80	4	0.41	0.00073
7	GO:0044281	small molecule metabolic process	715	11	3.7	0.00077
7	GO:0006733	oxidoreduction coenzyme metabolic process	82	4	0.42	0.00081
7	GO:0072524	pyridine-containing compound metabolic process	84	4	0.43	0.00088
7	GO:0072521	purine-containing compound metabolic process	149	5	0.77	0.00096
7	GO:0046034	ATP metabolic process	98	4	0.51	0.00157
7	GO:0005985	sucrose metabolic process	13	2	0.07	0.00196
7	GO:0009144	purine nucleoside triphosphate metabolic process	105	4	0.54	0.00202
7	GO:0009199	ribonucleoside triphosphate metabolic process	105	4	0.54	0.00202
7	GO:0009205	purine ribonucleoside triphosphate metabolic process	105	4	0.54	0.00202
7	GO:0009141	nucleoside triphosphate metabolic process	108	4	0.56	0.00224
7	GO:0009126	purine nucleoside monophosphate metabolic process	109	4	0.56	0.00232
7	GO:0009167	purine ribonucleoside monophosphate metabolic process	109	4	0.56	0.00232
7	GO:0009161	ribonucleoside monophosphate metabolic process	114	4	0.59	0.00273
7	GO:0009123	nucleoside monophosphate metabolic process	116	4	0.6	0.00291
7	GO:0042278	purine nucleoside metabolic process	126	4	0.65	0.00392
7	GO:0046128	purine ribonucleoside metabolic process	126	4	0.65	0.00392
7	GO:0009150	purine ribonucleotide metabolic process	129	4	0.67	0.00426
7	GO:0009259	ribonucleotide metabolic process	132	4	0.68	0.00462
7	GO:0006732	coenzyme metabolic process	133	4	0.69	0.00475
7	GO:0009119	ribonucleoside metabolic process	133	4	0.69	0.00475
7	GO:0006163	purine nucleotide metabolic process	135	4	0.7	0.00501
7	GO:0055086	nucleobase-containing small molecule metabolic process	229	5	1.18	0.00619
7	GO:0009116	nucleoside metabolic process	149	4	0.77	0.00708
7	GO:1901657	glycosyl compound metabolic process	149	4	0.77	0.00708
7	GO:0019693	ribose phosphate metabolic process	151	4	0.78	0.00742
7	GO:0051186	cofactor metabolic process	160	4	0.83	0.00907
7	GO:0042221	response to chemical	87	3	0.45	0.01008
7	GO:1901575	organic substance catabolic process	273	5	1.41	0.01271
7	GO:1901135	carbohydrate derivative metabolic process	274	5	1.42	0.0129
7	GO:0009056	catabolic process	278	5	1.44	0.01367
7	GO:0005984	disaccharide metabolic process	36	2	0.19	0.01471
7	GO:0009117	nucleotide metabolic process	191	4	0.99	0.01651
7	GO:0009311	oligosaccharide metabolic process	39	2	0.2	0.01713
7	GO:0006753	nucleoside phosphate metabolic process	195	4	1.01	0.01769
7	GO:0044763	single-organism cellular process	2362	19	12.21	0.01876
7	GO:0044262	cellular carbohydrate metabolic process	126	3	0.65	0.02695
7	GO:0000160	phosphorelay signal transduction system	58	2	0.3	0.03594
8	GO:0019751	polyol metabolic process	10	2	0.02	0.00018
8	GO:0016052	carbohydrate catabolic process	67	3	0.14	0.00034
8	GO:0050794	regulation of cellular process	1249	9	2.61	0.00035
8	GO:0050789	regulation of biological process	1283	9	2.68	0.00043
8	GO:0065007	biological regulation	1311	9	2.74	0.00051
8	GO:0006066	alcohol metabolic process	24	2	0.05	0.00111
8	GO:1901615	organic hydroxy compound metabolic process	30	2	0.06	0.00173
8	GO:0044282	small molecule catabolic process	33	2	0.07	0.00209
8	GO:0044262	cellular carbohydrate metabolic process	126	3	0.26	0.00211
8	GO:0006355	regulation of transcription, DNA-templated	767	6	1.6	0.00346
8	GO:1903506	regulation of nucleic acid-templated transcription	767	6	1.6	0.00346
8	GO:2001141	regulation of RNA biosynthetic process	767	6	1.6	0.00346
8	GO:0051252	regulation of RNA metabolic process	769	6	1.61	0.0035
8	GO:0019219	regulation of nucleobase-containing compound metabolic process	774	6	1.62	0.00362
8	GO:0009889	regulation of biosynthetic process	778	6	1.63	0.00371
8	GO:0010556	regulation of macromolecule biosynthetic process	778	6	1.63	0.00371
8	GO:0031326	regulation of cellular biosynthetic process	778	6	1.63	0.00371
8	GO:2000112	regulation of cellular macromolecule biosynthetic process	778	6	1.63	0.00371
8	GO:0051171	regulation of nitrogen compound metabolic process	782	6	1.64	0.00381
8	GO:0010468	regulation of gene expression	791	6	1.66	0.00404
8	GO:0080090	regulation of primary metabolic process	801	6	1.68	0.0043
8	GO:0031323	regulation of cellular metabolic process	802	6	1.68	0.00433
8	GO:0060255	regulation of macromolecule metabolic process	817	6	1.71	0.00475
8	GO:0019222	regulation of metabolic process	823	6	1.72	0.00493
8	GO:0044724	single-organism carbohydrate catabolic process	57	2	0.12	0.00615
8	GO:0006351	transcription, DNA-templated	865	6	1.81	0.00631
8	GO:0032774	RNA biosynthetic process	865	6	1.81	0.00631
8	GO:0097659	nucleic acid-templated transcription	865	6	1.81	0.00631
8	GO:0005975	carbohydrate metabolic process	603	5	1.26	0.00647
8	GO:0034654	nucleobase-containing compound biosynthetic process	968	6	2.03	0.01092
8	GO:0044723	single-organism carbohydrate metabolic process	247	3	0.52	0.01377
8	GO:0045454	cell redox homeostasis	89	2	0.19	0.0145
8	GO:0019438	aromatic compound biosynthetic process	1055	6	2.21	0.01642
8	GO:0019725	cellular homeostasis	97	2	0.2	0.01708
8	GO:0018130	heterocycle biosynthetic process	1068	6	2.23	0.01738
8	GO:1901575	organic substance catabolic process	273	3	0.57	0.018
8	GO:0016070	RNA metabolic process	1087	6	2.27	0.01887
8	GO:0009056	catabolic process	278	3	0.58	0.01888
8	GO:0042592	homeostatic process	105	2	0.22	0.01983
8	GO:1901362	organic cyclic compound biosynthetic process	1099	6	2.3	0.01985
8	GO:0000272	polysaccharide catabolic process	10	1	0.02	0.02074
8	GO:0044238	primary metabolic process	4619	14	9.67	0.02628
8	GO:0065008	regulation of biological quality	128	2	0.27	0.0287
8	GO:0044249	cellular biosynthetic process	1922	8	4.02	0.02937
8	GO:1901576	organic substance biosynthetic process	1943	8	4.07	0.03125
8	GO:0044712	single-organism catabolic process	135	2	0.28	0.03167
8	GO:0090304	nucleic acid metabolic process	1252	6	2.62	0.03575
8	GO:0071704	organic substance metabolic process	4810	14	10.07	0.04031
8	GO:0005992	trehalose biosynthetic process	21	1	0.04	0.04309
8	GO:0009058	biosynthetic process	2062	8	4.31	0.04357
8	GO:0005991	trehalose metabolic process	23	1	0.05	0.0471
8	GO:0046351	disaccharide biosynthetic process	24	1	0.05	0.0491
9	GO:0042254	ribosome biogenesis	55	13	0.22	7.1e-21
9	GO:0022613	ribonucleoprotein complex biogenesis	59	13	0.24	2e-20
9	GO:0006364	rRNA processing	30	10	0.12	7.7e-18
9	GO:0016072	rRNA metabolic process	30	10	0.12	7.7e-18
9	GO:0034470	ncRNA processing	66	10	0.27	4.9e-14
9	GO:0044085	cellular component biogenesis	180	13	0.73	7.8e-14
9	GO:0034660	ncRNA metabolic process	102	10	0.41	4.5e-12
9	GO:0010467	gene expression	1493	24	6.06	1.3e-11
9	GO:0006396	RNA processing	165	11	0.67	2.3e-11
9	GO:0071840	cellular component organization or biogenesis	380	13	1.54	1e-09
9	GO:0034641	cellular nitrogen compound metabolic process	2044	25	8.3	1.5e-09
9	GO:0006807	nitrogen compound metabolic process	2257	25	9.17	1.3e-08
9	GO:0044260	cellular macromolecule metabolic process	3124	28	12.69	5.3e-08
9	GO:0006412	translation	436	12	1.77	6.2e-08
9	GO:0043043	peptide biosynthetic process	441	12	1.79	7.1e-08
9	GO:0006518	peptide metabolic process	453	12	1.84	9.5e-08
9	GO:0043604	amide biosynthetic process	454	12	1.84	9.7e-08
9	GO:0043603	cellular amide metabolic process	475	12	1.93	1.6e-07
9	GO:0043170	macromolecule metabolic process	3448	28	14.01	6.2e-07
9	GO:1901566	organonitrogen compound biosynthetic process	736	13	2.99	2.6e-06
9	GO:0044237	cellular metabolic process	4137	29	16.8	8.4e-06
9	GO:1901564	organonitrogen compound metabolic process	997	13	4.05	7.1e-05
9	GO:0044238	primary metabolic process	4619	29	18.76	0.00013
9	GO:0071704	organic substance metabolic process	4810	29	19.54	0.00034
9	GO:0016070	RNA metabolic process	1087	12	4.42	0.00073
9	GO:0044267	cellular protein metabolic process	1840	16	7.47	0.00096
9	GO:0044271	cellular nitrogen compound biosynthetic process	1500	14	6.09	0.00122
9	GO:0009987	cellular process	5411	30	21.98	0.00123
9	GO:0090304	nucleic acid metabolic process	1252	12	5.09	0.00258
9	GO:0034645	cellular macromolecule biosynthetic process	1453	13	5.9	0.00298
9	GO:0009059	macromolecule biosynthetic process	1454	13	5.91	0.003
9	GO:0006139	nucleobase-containing compound metabolic process	1499	13	6.09	0.00396
9	GO:0019538	protein metabolic process	2140	16	8.69	0.00516
9	GO:0006413	translational initiation	28	2	0.11	0.00566
9	GO:0046483	heterocycle metabolic process	1612	13	6.55	0.00753
9	GO:0006725	cellular aromatic compound metabolic process	1644	13	6.68	0.00892
9	GO:0043414	macromolecule methylation	36	2	0.15	0.00925
9	GO:1901360	organic cyclic compound metabolic process	1676	13	6.81	0.01052
9	GO:0009451	RNA modification	42	2	0.17	0.01245
9	GO:0044249	cellular biosynthetic process	1922	14	7.81	0.01308
9	GO:0032259	methylation	44	2	0.18	0.01361
9	GO:1901576	organic substance biosynthetic process	1943	14	7.89	0.0144
9	GO:0006457	protein folding	143	3	0.58	0.01982
9	GO:0009058	biosynthetic process	2062	14	8.38	0.024
9	GO:0001510	RNA methylation	11	1	0.04	0.04381
10	GO:0006412	translation	436	18	2.63	2.4e-11
10	GO:0043043	peptide biosynthetic process	441	18	2.66	2.9e-11
10	GO:1901566	organonitrogen compound biosynthetic process	736	22	4.44	3.9e-11
10	GO:0006518	peptide metabolic process	453	18	2.73	4.5e-11
10	GO:0043604	amide biosynthetic process	454	18	2.74	4.7e-11
10	GO:0043603	cellular amide metabolic process	475	18	2.86	9.9e-11
10	GO:0019538	protein metabolic process	2140	33	12.91	2e-09
10	GO:1901564	organonitrogen compound metabolic process	997	22	6.01	1.4e-08
10	GO:0006457	protein folding	143	9	0.86	1.4e-07
10	GO:0044267	cellular protein metabolic process	1840	28	11.1	1.8e-07
10	GO:0043170	macromolecule metabolic process	3448	38	20.8	5.6e-07
10	GO:0010467	gene expression	1493	23	9.01	4.3e-06
10	GO:0044271	cellular nitrogen compound biosynthetic process	1500	23	9.05	4.7e-06
10	GO:0034641	cellular nitrogen compound metabolic process	2044	26	12.33	2.5e-05
10	GO:0044260	cellular macromolecule metabolic process	3124	33	18.84	3.8e-05
10	GO:0006807	nitrogen compound metabolic process	2257	27	13.61	5e-05
10	GO:0044249	cellular biosynthetic process	1922	24	11.59	9.5e-05
10	GO:0009058	biosynthetic process	2062	25	12.44	9.9e-05
10	GO:1901576	organic substance biosynthetic process	1943	24	11.72	0.00011
10	GO:0034645	cellular macromolecule biosynthetic process	1453	20	8.76	0.00014
10	GO:0009059	macromolecule biosynthetic process	1454	20	8.77	0.00014
10	GO:0071704	organic substance metabolic process	4810	41	29.01	0.00021
10	GO:0044237	cellular metabolic process	4137	37	24.95	0.00036
10	GO:0033014	tetrapyrrole biosynthetic process	27	3	0.16	0.00054
10	GO:0044238	primary metabolic process	4619	39	27.86	0.00071
10	GO:0033013	tetrapyrrole metabolic process	32	3	0.19	0.0009
10	GO:0008152	metabolic process	6254	45	37.72	0.00614
10	GO:0009987	cellular process	5411	41	32.64	0.00614
10	GO:0006414	translational elongation	23	2	0.14	0.00832
10	GO:0018193	peptidyl-amino acid modification	48	2	0.29	0.03371
11	GO:0006457	protein folding	143	14	0.4	1e-19
11	GO:0044267	cellular protein metabolic process	1840	15	5.21	1.5e-05
11	GO:0019538	protein metabolic process	2140	15	6.06	0.0001
11	GO:0044260	cellular macromolecule metabolic process	3124	18	8.84	0.00012
11	GO:0043170	macromolecule metabolic process	3448	18	9.76	0.00051
11	GO:0044237	cellular metabolic process	4137	19	11.71	0.0017
11	GO:0006950	response to stress	292	4	0.83	0.00843
11	GO:0044238	primary metabolic process	4619	19	13.08	0.0088
11	GO:0071704	organic substance metabolic process	4810	19	13.62	0.01566
11	GO:0009987	cellular process	5411	20	15.32	0.02596
11	GO:0016042	lipid catabolic process	17	1	0.05	0.0471
11	GO:0009628	response to abiotic stimulus	18	1	0.05	0.0498
12	GO:0006366	transcription from RNA polymerase II promoter	28	4	0.06	2.6e-07
12	GO:0016070	RNA metabolic process	1087	11	2.27	1.3e-06
12	GO:0090304	nucleic acid metabolic process	1252	11	2.62	5.6e-06
12	GO:0006357	regulation of transcription from RNA polymerase II promoter	20	3	0.04	8.5e-06
12	GO:0006351	transcription, DNA-templated	865	9	1.81	1.9e-05
12	GO:0032774	RNA biosynthetic process	865	9	1.81	1.9e-05
12	GO:0097659	nucleic acid-templated transcription	865	9	1.81	1.9e-05
12	GO:0010467	gene expression	1493	11	3.12	3.2e-05
12	GO:0006139	nucleobase-containing compound metabolic process	1499	11	3.14	3.4e-05
12	GO:0034654	nucleobase-containing compound biosynthetic process	968	9	2.03	4.6e-05
12	GO:0046483	heterocycle metabolic process	1612	11	3.37	6.9e-05
12	GO:0006725	cellular aromatic compound metabolic process	1644	11	3.44	8.3e-05
12	GO:0019438	aromatic compound biosynthetic process	1055	9	2.21	9.3e-05
12	GO:1901360	organic cyclic compound metabolic process	1676	11	3.51	0.0001
12	GO:0018130	heterocycle biosynthetic process	1068	9	2.23	0.0001
12	GO:1901362	organic cyclic compound biosynthetic process	1099	9	2.3	0.00013
12	GO:0034641	cellular nitrogen compound metabolic process	2044	11	4.28	0.00065
12	GO:0016569	covalent chromatin modification	19	2	0.04	0.00069
12	GO:0016570	histone modification	19	2	0.04	0.00069
12	GO:0016568	chromatin modification	23	2	0.05	0.00102
12	GO:0034645	cellular macromolecule biosynthetic process	1453	9	3.04	0.00112
12	GO:0009059	macromolecule biosynthetic process	1454	9	3.04	0.00112
12	GO:0044271	cellular nitrogen compound biosynthetic process	1500	9	3.14	0.00142
12	GO:0006807	nitrogen compound metabolic process	2257	11	4.72	0.00162
12	GO:0006352	DNA-templated transcription, initiation	34	2	0.07	0.00222
12	GO:0006397	mRNA processing	42	2	0.09	0.00338
12	GO:0016071	mRNA metabolic process	49	2	0.1	0.00457
12	GO:0006325	chromatin organization	54	2	0.11	0.00553
12	GO:0044260	cellular macromolecule metabolic process	3124	12	6.54	0.00731
12	GO:1902589	single-organism organelle organization	64	2	0.13	0.0077
12	GO:0044249	cellular biosynthetic process	1922	9	4.02	0.00844
12	GO:1901576	organic substance biosynthetic process	1943	9	4.07	0.00909
12	GO:0051276	chromosome organization	86	2	0.18	0.01359
12	GO:0009058	biosynthetic process	2062	9	4.31	0.01363
12	GO:0006355	regulation of transcription, DNA-templated	767	5	1.6	0.0175
12	GO:1903506	regulation of nucleic acid-templated transcription	767	5	1.6	0.0175
12	GO:2001141	regulation of RNA biosynthetic process	767	5	1.6	0.0175
12	GO:0051252	regulation of RNA metabolic process	769	5	1.61	0.01769
12	GO:0043170	macromolecule metabolic process	3448	12	7.22	0.01797
12	GO:0019219	regulation of nucleobase-containing compound metabolic process	774	5	1.62	0.01815
12	GO:0009889	regulation of biosynthetic process	778	5	1.63	0.01853
12	GO:0010556	regulation of macromolecule biosynthetic process	778	5	1.63	0.01853
12	GO:0031326	regulation of cellular biosynthetic process	778	5	1.63	0.01853
12	GO:2000112	regulation of cellular macromolecule biosynthetic process	778	5	1.63	0.01853
12	GO:0051171	regulation of nitrogen compound metabolic process	782	5	1.64	0.01892
12	GO:0010468	regulation of gene expression	791	5	1.66	0.0198
12	GO:0080090	regulation of primary metabolic process	801	5	1.68	0.02082
12	GO:0031323	regulation of cellular metabolic process	802	5	1.68	0.02092
12	GO:0060255	regulation of macromolecule metabolic process	817	5	1.71	0.02251
12	GO:0017038	protein import	11	1	0.02	0.02279
12	GO:0019222	regulation of metabolic process	823	5	1.72	0.02317
12	GO:0043933	macromolecular complex subunit organization	133	2	0.28	0.03081
12	GO:0006996	organelle organization	155	2	0.32	0.04078
12	GO:0072594	establishment of protein localization to organelle	21	1	0.04	0.04309
12	GO:0006396	RNA processing	165	2	0.35	0.04567
13	GO:0006355	regulation of transcription, DNA-templated	767	14	3.68	6.3e-06
13	GO:1903506	regulation of nucleic acid-templated transcription	767	14	3.68	6.3e-06
13	GO:2001141	regulation of RNA biosynthetic process	767	14	3.68	6.3e-06
13	GO:0051252	regulation of RNA metabolic process	769	14	3.69	6.5e-06
13	GO:0019219	regulation of nucleobase-containing compound metabolic process	774	14	3.72	7.1e-06
13	GO:0009889	regulation of biosynthetic process	778	14	3.73	7.5e-06
13	GO:0010556	regulation of macromolecule biosynthetic process	778	14	3.73	7.5e-06
13	GO:0031326	regulation of cellular biosynthetic process	778	14	3.73	7.5e-06
13	GO:2000112	regulation of cellular macromolecule biosynthetic process	778	14	3.73	7.5e-06
13	GO:0051171	regulation of nitrogen compound metabolic process	782	14	3.75	8e-06
13	GO:0010468	regulation of gene expression	791	14	3.8	9.1e-06
13	GO:0080090	regulation of primary metabolic process	801	14	3.85	1.1e-05
13	GO:0031323	regulation of cellular metabolic process	802	14	3.85	1.1e-05
13	GO:0060255	regulation of macromolecule metabolic process	817	14	3.92	1.3e-05
13	GO:0019222	regulation of metabolic process	823	14	3.95	1.4e-05
13	GO:0006351	transcription, DNA-templated	865	14	4.15	2.5e-05
13	GO:0032774	RNA biosynthetic process	865	14	4.15	2.5e-05
13	GO:0097659	nucleic acid-templated transcription	865	14	4.15	2.5e-05
13	GO:0034654	nucleobase-containing compound biosynthetic process	968	14	4.65	9e-05
13	GO:0019438	aromatic compound biosynthetic process	1055	14	5.06	0.00023
13	GO:0018130	heterocycle biosynthetic process	1068	14	5.13	0.00026
13	GO:0016070	RNA metabolic process	1087	14	5.22	0.00031
13	GO:1901362	organic cyclic compound biosynthetic process	1099	14	5.28	0.00035
13	GO:0090304	nucleic acid metabolic process	1252	15	6.01	0.00039
13	GO:0065007	biological regulation	1311	15	6.29	0.00065
13	GO:0050794	regulation of cellular process	1249	14	6	0.00131
13	GO:0050789	regulation of biological process	1283	14	6.16	0.00171
13	GO:0006508	proteolysis	374	7	1.8	0.00178
13	GO:0046483	heterocycle metabolic process	1612	16	7.74	0.00193
13	GO:0071704	organic substance metabolic process	4810	32	23.09	0.00207
13	GO:0006725	cellular aromatic compound metabolic process	1644	16	7.89	0.00239
13	GO:0044238	primary metabolic process	4619	31	22.17	0.00262
13	GO:0006139	nucleobase-containing compound metabolic process	1499	15	7.2	0.00266
13	GO:0034645	cellular macromolecule biosynthetic process	1453	14	6.98	0.00562
13	GO:0009059	macromolecule biosynthetic process	1454	14	6.98	0.00566
13	GO:0010467	gene expression	1493	14	7.17	0.0072
13	GO:0044271	cellular nitrogen compound biosynthetic process	1500	14	7.2	0.00751
13	GO:1901360	organic cyclic compound metabolic process	1676	15	8.05	0.00799
13	GO:0044249	cellular biosynthetic process	1922	16	9.23	0.01191
13	GO:0043170	macromolecule metabolic process	3448	24	16.55	0.01245
13	GO:1901576	organic substance biosynthetic process	1943	16	9.33	0.01324
13	GO:0009058	biosynthetic process	2062	16	9.9	0.02313
13	GO:0006807	nitrogen compound metabolic process	2257	17	10.83	0.02447
13	GO:0034641	cellular nitrogen compound metabolic process	2044	15	9.81	0.04576
13	GO:0000272	polysaccharide catabolic process	10	1	0.05	0.04701
14	GO:0006412	translation	436	29	1.99	1.5e-30
14	GO:0043043	peptide biosynthetic process	441	29	2.01	2.1e-30
14	GO:0006518	peptide metabolic process	453	29	2.06	4.7e-30
14	GO:0043604	amide biosynthetic process	454	29	2.07	5e-30
14	GO:0043603	cellular amide metabolic process	475	29	2.16	1.9e-29
14	GO:1901566	organonitrogen compound biosynthetic process	736	30	3.35	1.7e-25
14	GO:1901564	organonitrogen compound metabolic process	997	31	4.54	4.2e-23
14	GO:0010467	gene expression	1493	31	6.8	8.8e-18
14	GO:0044271	cellular nitrogen compound biosynthetic process	1500	31	6.83	1e-17
14	GO:0034645	cellular macromolecule biosynthetic process	1453	30	6.62	8.2e-17
14	GO:0009059	macromolecule biosynthetic process	1454	30	6.62	8.4e-17
14	GO:0034641	cellular nitrogen compound metabolic process	2044	32	9.31	6.1e-15
14	GO:0006807	nitrogen compound metabolic process	2257	33	10.28	7.1e-15
14	GO:0044249	cellular biosynthetic process	1922	31	8.75	1.6e-14
14	GO:1901576	organic substance biosynthetic process	1943	31	8.85	2.2e-14
14	GO:0044267	cellular protein metabolic process	1840	30	8.38	7e-14
14	GO:0009058	biosynthetic process	2062	31	9.39	1.3e-13
14	GO:0019538	protein metabolic process	2140	31	9.75	3.8e-13
14	GO:0044260	cellular macromolecule metabolic process	3124	32	14.23	2e-09
14	GO:0043170	macromolecule metabolic process	3448	33	15.7	3.8e-09
14	GO:0044237	cellular metabolic process	4137	33	18.84	8.8e-07
14	GO:0071704	organic substance metabolic process	4810	35	21.91	1.2e-06
14	GO:0044238	primary metabolic process	4619	34	21.04	3.1e-06
14	GO:0009987	cellular process	5411	33	24.64	0.0015
14	GO:0042254	ribosome biogenesis	55	3	0.25	0.0019
14	GO:0022613	ribonucleoprotein complex biogenesis	59	3	0.27	0.0024
14	GO:0008152	metabolic process	6254	35	28.48	0.0044
14	GO:0044085	cellular component biogenesis	180	3	0.82	0.0479
15	GO:0006629	lipid metabolic process	358	6	1.01	0.00037
15	GO:0006091	generation of precursor metabolites and energy	123	3	0.35	0.00481
15	GO:0006096	glycolytic process	52	2	0.15	0.00933
15	GO:0006757	ATP generation from ADP	52	2	0.15	0.00933
15	GO:0009135	purine nucleoside diphosphate metabolic process	52	2	0.15	0.00933
15	GO:0009179	purine ribonucleoside diphosphate metabolic process	52	2	0.15	0.00933
15	GO:0009185	ribonucleoside diphosphate metabolic process	52	2	0.15	0.00933
15	GO:0046031	ADP metabolic process	52	2	0.15	0.00933
15	GO:0006090	pyruvate metabolic process	55	2	0.16	0.01039
15	GO:0044724	single-organism carbohydrate catabolic process	57	2	0.16	0.01113
15	GO:0006165	nucleoside diphosphate phosphorylation	59	2	0.17	0.01189
15	GO:0046939	nucleotide phosphorylation	59	2	0.17	0.01189
15	GO:0009132	nucleoside diphosphate metabolic process	61	2	0.17	0.01268
15	GO:0016052	carbohydrate catabolic process	67	2	0.19	0.01516
15	GO:0016311	dephosphorylation	74	2	0.21	0.0183
15	GO:0019362	pyridine nucleotide metabolic process	80	2	0.23	0.02119
15	GO:0046496	nicotinamide nucleotide metabolic process	80	2	0.23	0.02119
15	GO:0006733	oxidoreduction coenzyme metabolic process	82	2	0.23	0.0222
15	GO:0072524	pyridine-containing compound metabolic process	84	2	0.24	0.02322
15	GO:0005975	carbohydrate metabolic process	603	5	1.71	0.02433
15	GO:0019752	carboxylic acid metabolic process	421	4	1.19	0.02876
15	GO:0043436	oxoacid metabolic process	426	4	1.21	0.02988
15	GO:0006082	organic acid metabolic process	427	4	1.21	0.0301
15	GO:0046034	ATP metabolic process	98	2	0.28	0.03091
15	GO:0044723	single-organism carbohydrate metabolic process	247	3	0.7	0.03139
15	GO:0009144	purine nucleoside triphosphate metabolic process	105	2	0.3	0.03509
15	GO:0009199	ribonucleoside triphosphate metabolic process	105	2	0.3	0.03509
15	GO:0009205	purine ribonucleoside triphosphate metabolic process	105	2	0.3	0.03509
15	GO:0009141	nucleoside triphosphate metabolic process	108	2	0.31	0.03695
15	GO:0009126	purine nucleoside monophosphate metabolic process	109	2	0.31	0.03757
15	GO:0009167	purine ribonucleoside monophosphate metabolic process	109	2	0.31	0.03757
15	GO:0009161	ribonucleoside monophosphate metabolic process	114	2	0.32	0.04077
15	GO:1901135	carbohydrate derivative metabolic process	274	3	0.78	0.04083
15	GO:0006108	malate metabolic process	15	1	0.04	0.04167
15	GO:0009123	nucleoside monophosphate metabolic process	116	2	0.33	0.04207
15	GO:0009247	glycolipid biosynthetic process	16	1	0.05	0.04439
15	GO:0046467	membrane lipid biosynthetic process	16	1	0.05	0.04439
15	GO:0006099	tricarboxylic acid cycle	17	1	0.05	0.0471
15	GO:0006101	citrate metabolic process	17	1	0.05	0.0471
15	GO:0046474	glycerophospholipid biosynthetic process	17	1	0.05	0.0471
15	GO:0044710	single-organism metabolic process	2091	10	5.92	0.04873
15	GO:0042278	purine nucleoside metabolic process	126	2	0.36	0.04884
15	GO:0046128	purine ribonucleoside metabolic process	126	2	0.36	0.04884
15	GO:0009060	aerobic respiration	18	1	0.05	0.0498
15	GO:0019637	organophosphate metabolic process	297	3	0.84	0.0499
16	GO:0009607	response to biotic stimulus	20	3	0.06	3.2e-05
16	GO:0006952	defense response	46	3	0.15	0.0004
16	GO:0009605	response to external stimulus	11	2	0.04	0.00053
16	GO:0071554	cell wall organization or biogenesis	79	2	0.25	0.0261
16	GO:0051704	multi-organism process	82	2	0.26	0.02797
16	GO:0006835	dicarboxylic acid transport	12	1	0.04	0.03776
16	GO:0015740	C4-dicarboxylate transport	12	1	0.04	0.03776
16	GO:0015743	malate transport	12	1	0.04	0.03776
17	GO:0019439	aromatic compound catabolic process	57	4	0.12	4.8e-06
17	GO:1901361	organic cyclic compound catabolic process	57	4	0.12	4.8e-06
17	GO:0009698	phenylpropanoid metabolic process	26	3	0.05	1.9e-05
17	GO:0009808	lignin metabolic process	26	3	0.05	1.9e-05
17	GO:0019748	secondary metabolic process	26	3	0.05	1.9e-05
17	GO:0046271	phenylpropanoid catabolic process	26	3	0.05	1.9e-05
17	GO:0046274	lignin catabolic process	26	3	0.05	1.9e-05
17	GO:0030243	cellulose metabolic process	29	3	0.06	2.7e-05
17	GO:0030244	cellulose biosynthetic process	29	3	0.06	2.7e-05
17	GO:0044248	cellular catabolic process	186	5	0.39	2.9e-05
17	GO:0051273	beta-glucan metabolic process	40	3	0.08	7.2e-05
17	GO:0051274	beta-glucan biosynthetic process	40	3	0.08	7.2e-05
17	GO:0044712	single-organism catabolic process	135	4	0.28	0.00015
17	GO:0000271	polysaccharide biosynthetic process	54	3	0.11	0.00018
17	GO:0009250	glucan biosynthetic process	54	3	0.11	0.00018
17	GO:0033692	cellular polysaccharide biosynthetic process	54	3	0.11	0.00018
17	GO:1901575	organic substance catabolic process	273	5	0.57	0.00018
17	GO:0009056	catabolic process	278	5	0.58	0.0002
17	GO:0006073	cellular glucan metabolic process	77	3	0.16	0.00051
17	GO:0044042	glucan metabolic process	77	3	0.16	0.00051
17	GO:0044264	cellular polysaccharide metabolic process	77	3	0.16	0.00051
17	GO:0034637	cellular carbohydrate biosynthetic process	80	3	0.17	0.00057
17	GO:0016051	carbohydrate biosynthetic process	85	3	0.18	0.00068
17	GO:0005976	polysaccharide metabolic process	87	3	0.18	0.00072
17	GO:0044262	cellular carbohydrate metabolic process	126	3	0.26	0.00211
17	GO:1901565	organonitrogen compound catabolic process	47	2	0.1	0.00422
17	GO:0005975	carbohydrate metabolic process	603	5	1.26	0.00647
17	GO:0044763	single-organism cellular process	2362	10	4.94	0.00996
17	GO:0071554	cell wall organization or biogenesis	79	2	0.17	0.01155
17	GO:0044723	single-organism carbohydrate metabolic process	247	3	0.52	0.01377
17	GO:0044710	single-organism metabolic process	2091	9	4.38	0.01496
17	GO:0044699	single-organism process	3618	12	7.57	0.0274
17	GO:0006026	aminoglycan catabolic process	14	1	0.03	0.02892
17	GO:0006030	chitin metabolic process	14	1	0.03	0.02892
17	GO:0006032	chitin catabolic process	14	1	0.03	0.02892
17	GO:0046348	amino sugar catabolic process	14	1	0.03	0.02892
17	GO:1901071	glucosamine-containing compound metabolic process	14	1	0.03	0.02892
17	GO:1901072	glucosamine-containing compound catabolic process	14	1	0.03	0.02892
17	GO:0006040	amino sugar metabolic process	15	1	0.03	0.03096
17	GO:0006022	aminoglycan metabolic process	17	1	0.04	0.03502
17	GO:1901606	alpha-amino acid catabolic process	19	1	0.04	0.03906
17	GO:0009063	cellular amino acid catabolic process	21	1	0.04	0.04309
17	GO:1901136	carbohydrate derivative catabolic process	23	1	0.05	0.0471
18	GO:0006979	response to oxidative stress	73	3	0.14	0.00036
18	GO:0016226	iron-sulfur cluster assembly	17	2	0.03	0.00049
18	GO:0031163	metallo-sulfur cluster assembly	17	2	0.03	0.00049
18	GO:0019725	cellular homeostasis	97	3	0.19	0.00083
18	GO:0042592	homeostatic process	105	3	0.21	0.00104
18	GO:0065008	regulation of biological quality	128	3	0.25	0.00184
18	GO:0006950	response to stress	292	3	0.58	0.01818
18	GO:0006091	generation of precursor metabolites and energy	123	2	0.24	0.02375
18	GO:0022607	cellular component assembly	124	2	0.24	0.02412
18	GO:0006099	tricarboxylic acid cycle	17	1	0.03	0.03299
18	GO:0006101	citrate metabolic process	17	1	0.03	0.03299
18	GO:0009060	aerobic respiration	18	1	0.04	0.0349
18	GO:0072350	tricarboxylic acid metabolic process	22	1	0.04	0.0425
18	GO:0044699	single-organism process	3618	11	7.13	0.04475
18	GO:0044085	cellular component biogenesis	180	2	0.35	0.04779
19	GO:0044765	single-organism transport	842	6	0.73	7.8e-06
19	GO:1902578	single-organism localization	860	6	0.74	8.8e-06
19	GO:0055085	transmembrane transport	540	5	0.47	2.4e-05
19	GO:0006810	transport	1209	6	1.04	6.6e-05
19	GO:0051234	establishment of localization	1218	6	1.05	6.9e-05
19	GO:0051179	localization	1227	6	1.06	7.2e-05
19	GO:0006811	ion transport	374	4	0.32	0.00014
19	GO:0006816	calcium ion transport	24	2	0.02	0.00017
19	GO:0030001	metal ion transport	190	3	0.16	0.00041
19	GO:0070838	divalent metal ion transport	40	2	0.03	0.00049
19	GO:0072511	divalent inorganic cation transport	40	2	0.03	0.00049
19	GO:0006812	cation transport	275	3	0.24	0.00121
19	GO:0044763	single-organism cellular process	2362	6	2.04	0.00316
19	GO:0044699	single-organism process	3618	7	3.12	0.00346
19	GO:0006835	dicarboxylic acid transport	12	1	0.01	0.0103
19	GO:0015740	C4-dicarboxylate transport	12	1	0.01	0.0103
19	GO:0015743	malate transport	12	1	0.01	0.0103
19	GO:0071804	cellular potassium ion transport	24	1	0.02	0.0205
19	GO:0071805	potassium ion transmembrane transport	24	1	0.02	0.0205
19	GO:0045017	glycerolipid biosynthetic process	25	1	0.02	0.02135
19	GO:0015849	organic acid transport	35	1	0.03	0.02978
19	GO:0046942	carboxylic acid transport	35	1	0.03	0.02978
19	GO:0006813	potassium ion transport	40	1	0.03	0.03397
19	GO:0015711	organic anion transport	48	1	0.04	0.04065
20	GO:0006790	sulfur compound metabolic process	65	5	0.14	2.2e-07
20	GO:0055114	oxidation-reduction process	1060	9	2.35	0.00017
20	GO:0000097	sulfur amino acid biosynthetic process	22	2	0.05	0.00104
20	GO:0000096	sulfur amino acid metabolic process	25	2	0.06	0.00135
20	GO:0044710	single-organism metabolic process	2091	11	4.63	0.00159
20	GO:0009069	serine family amino acid metabolic process	35	2	0.08	0.00264
20	GO:1901605	alpha-amino acid metabolic process	148	3	0.33	0.00396
20	GO:0044272	sulfur compound biosynthetic process	48	2	0.11	0.00492
20	GO:0006520	cellular amino acid metabolic process	244	3	0.54	0.01564
20	GO:1901607	alpha-amino acid biosynthetic process	100	2	0.22	0.02019
20	GO:0006534	cysteine metabolic process	11	1	0.02	0.02412
20	GO:0009086	methionine biosynthetic process	11	1	0.02	0.02412
20	GO:0019344	cysteine biosynthetic process	11	1	0.02	0.02412
20	GO:0008652	cellular amino acid biosynthetic process	120	2	0.27	0.02837
20	GO:0006555	methionine metabolic process	13	1	0.03	0.02844
20	GO:0008272	sulfate transport	15	1	0.03	0.03275
20	GO:0072348	sulfur compound transport	15	1	0.03	0.03275
20	GO:0006544	glycine metabolic process	17	1	0.04	0.03704
20	GO:0009070	serine family amino acid biosynthetic process	20	1	0.04	0.04344
20	GO:0044699	single-organism process	3618	12	8.02	0.04927
21	GO:0006950	response to stress	292	6	0.72	5.2e-05
21	GO:0050896	response to stimulus	721	6	1.77	0.0063
21	GO:0055114	oxidation-reduction process	1060	7	2.61	0.0105
21	GO:0006026	aminoglycan catabolic process	14	1	0.03	0.0339
21	GO:0006030	chitin metabolic process	14	1	0.03	0.0339
21	GO:0006032	chitin catabolic process	14	1	0.03	0.0339
21	GO:0046348	amino sugar catabolic process	14	1	0.03	0.0339
21	GO:1901071	glucosamine-containing compound metabolic process	14	1	0.03	0.0339
21	GO:1901072	glucosamine-containing compound catabolic process	14	1	0.03	0.0339
21	GO:0006040	amino sugar metabolic process	15	1	0.04	0.0363
21	GO:0006022	aminoglycan metabolic process	17	1	0.04	0.0411
21	GO:0009607	response to biotic stimulus	20	1	0.05	0.0482
21	GO:0044710	single-organism metabolic process	2091	9	5.15	0.0484
22	GO:0015979	photosynthesis	80	5	0.07	1.7e-09
22	GO:0006096	glycolytic process	52	1	0.04	0.044
22	GO:0006757	ATP generation from ADP	52	1	0.04	0.044
22	GO:0009135	purine nucleoside diphosphate metabolic process	52	1	0.04	0.044
22	GO:0009179	purine ribonucleoside diphosphate metabolic process	52	1	0.04	0.044
22	GO:0009185	ribonucleoside diphosphate metabolic process	52	1	0.04	0.044
22	GO:0046031	ADP metabolic process	52	1	0.04	0.044
22	GO:0006090	pyruvate metabolic process	55	1	0.05	0.046
22	GO:0044724	single-organism carbohydrate catabolic process	57	1	0.05	0.048
23	GO:0006468	protein phosphorylation	949	5	0.58	2.2e-05
23	GO:0016310	phosphorylation	1047	5	0.64	3.5e-05
23	GO:0006464	cellular protein modification process	1207	5	0.74	7.2e-05
23	GO:0036211	protein modification process	1207	5	0.74	7.2e-05
23	GO:0043412	macromolecule modification	1252	5	0.77	8.6e-05
23	GO:0006796	phosphate-containing compound metabolic process	1330	5	0.82	0.00012
23	GO:0006793	phosphorus metabolic process	1332	5	0.82	0.00012
23	GO:0044267	cellular protein metabolic process	1840	5	1.13	0.00059
23	GO:0019538	protein metabolic process	2140	5	1.32	0.00126
23	GO:0044260	cellular macromolecule metabolic process	3124	5	1.92	0.00839
23	GO:0043170	macromolecule metabolic process	3448	5	2.12	0.01375
23	GO:0044237	cellular metabolic process	4137	5	2.55	0.0342
24	GO:0006414	translational elongation	23	2	0.02	0.00011
24	GO:0006412	translation	436	3	0.32	0.00272
24	GO:0043043	peptide biosynthetic process	441	3	0.33	0.00281
24	GO:0006518	peptide metabolic process	453	3	0.33	0.00303
24	GO:0043604	amide biosynthetic process	454	3	0.34	0.00305
24	GO:0043603	cellular amide metabolic process	475	3	0.35	0.00348
24	GO:0034645	cellular macromolecule biosynthetic process	1453	4	1.07	0.01125
24	GO:0009059	macromolecule biosynthetic process	1454	4	1.07	0.01128
24	GO:1901566	organonitrogen compound biosynthetic process	736	3	0.54	0.01202
24	GO:0010467	gene expression	1493	4	1.1	0.01243
24	GO:0044271	cellular nitrogen compound biosynthetic process	1500	4	1.11	0.01265
24	GO:1901564	organonitrogen compound metabolic process	997	3	0.74	0.02767
24	GO:0044249	cellular biosynthetic process	1922	4	1.42	0.03091
24	GO:1901576	organic substance biosynthetic process	1943	4	1.44	0.03212
24	GO:0034641	cellular nitrogen compound metabolic process	2044	4	1.51	0.03839
24	GO:0009058	biosynthetic process	2062	4	1.52	0.03959
25	GO:0006355	regulation of transcription, DNA-templated	767	5	0.57	4.1e-05
25	GO:1903506	regulation of nucleic acid-templated transcription	767	5	0.57	4.1e-05
25	GO:2001141	regulation of RNA biosynthetic process	767	5	0.57	4.1e-05
25	GO:0051252	regulation of RNA metabolic process	769	5	0.57	4.2e-05
25	GO:0019219	regulation of nucleobase-containing compound metabolic process	774	5	0.57	4.3e-05
25	GO:0009889	regulation of biosynthetic process	778	5	0.57	4.4e-05
25	GO:0010556	regulation of macromolecule biosynthetic process	778	5	0.57	4.4e-05
25	GO:0031326	regulation of cellular biosynthetic process	778	5	0.57	4.4e-05
25	GO:2000112	regulation of cellular macromolecule biosynthetic process	778	5	0.57	4.4e-05
25	GO:0051171	regulation of nitrogen compound metabolic process	782	5	0.58	4.5e-05
25	GO:0010468	regulation of gene expression	791	5	0.58	4.8e-05
25	GO:0080090	regulation of primary metabolic process	801	5	0.59	5.1e-05
25	GO:0031323	regulation of cellular metabolic process	802	5	0.59	5.1e-05
25	GO:0060255	regulation of macromolecule metabolic process	817	5	0.6	5.6e-05
25	GO:0019222	regulation of metabolic process	823	5	0.61	5.8e-05
25	GO:0006351	transcription, DNA-templated	865	5	0.64	7.4e-05
25	GO:0032774	RNA biosynthetic process	865	5	0.64	7.4e-05
25	GO:0097659	nucleic acid-templated transcription	865	5	0.64	7.4e-05
25	GO:0034654	nucleobase-containing compound biosynthetic process	968	5	0.71	0.00013
25	GO:0019438	aromatic compound biosynthetic process	1055	5	0.78	0.0002
25	GO:0018130	heterocycle biosynthetic process	1068	5	0.79	0.00021
25	GO:0016070	RNA metabolic process	1087	5	0.8	0.00023
25	GO:1901362	organic cyclic compound biosynthetic process	1099	5	0.81	0.00024
25	GO:0050794	regulation of cellular process	1249	5	0.92	0.00045
25	GO:0090304	nucleic acid metabolic process	1252	5	0.92	0.00045
25	GO:0050789	regulation of biological process	1283	5	0.95	0.00051
25	GO:0065007	biological regulation	1311	5	0.97	0.00056
25	GO:0034645	cellular macromolecule biosynthetic process	1453	5	1.07	0.00093
25	GO:0009059	macromolecule biosynthetic process	1454	5	1.07	0.00093
25	GO:0010467	gene expression	1493	5	1.1	0.00106
25	GO:0006139	nucleobase-containing compound metabolic process	1499	5	1.11	0.00108
25	GO:0044271	cellular nitrogen compound biosynthetic process	1500	5	1.11	0.00108
25	GO:0046483	heterocycle metabolic process	1612	5	1.19	0.00153
25	GO:0006725	cellular aromatic compound metabolic process	1644	5	1.21	0.00169
25	GO:1901360	organic cyclic compound metabolic process	1676	5	1.24	0.00185
25	GO:0044260	cellular macromolecule metabolic process	3124	6	2.31	0.00322
25	GO:0044249	cellular biosynthetic process	1922	5	1.42	0.00356
25	GO:1901576	organic substance biosynthetic process	1943	5	1.44	0.00375
25	GO:0034641	cellular nitrogen compound metabolic process	2044	5	1.51	0.00477
25	GO:0009058	biosynthetic process	2062	5	1.52	0.00497
25	GO:0043170	macromolecule metabolic process	3448	6	2.55	0.00583
25	GO:0006807	nitrogen compound metabolic process	2257	5	1.67	0.00761
25	GO:0044237	cellular metabolic process	4137	6	3.06	0.01741
25	GO:0044238	primary metabolic process	4619	6	3.41	0.03373
25	GO:0071704	organic substance metabolic process	4810	6	3.55	0.04302
26	GO:0006470	protein dephosphorylation	54	4	0.07	3.6e-07
26	GO:0016311	dephosphorylation	74	4	0.09	1.3e-06
26	GO:1901700	response to oxygen-containing compound	10	1	0.01	0.012
26	GO:0010035	response to inorganic substance	11	1	0.01	0.013
26	GO:0007275	multicellular organismal development	13	1	0.02	0.016
26	GO:0044707	single-multicellular organism process	13	1	0.02	0.016
26	GO:0009628	response to abiotic stimulus	18	1	0.02	0.022
26	GO:0032502	developmental process	19	1	0.02	0.023
26	GO:0044767	single-organism developmental process	19	1	0.02	0.023
26	GO:0044260	cellular macromolecule metabolic process	3124	7	3.85	0.044
26	GO:0006464	cellular protein modification process	1207	4	1.49	0.048
26	GO:0036211	protein modification process	1207	4	1.49	0.048
27	GO:0042545	cell wall modification	39	1	0.02	0.024
27	GO:0045229	external encapsulating structure organization	65	1	0.04	0.039
27	GO:0071555	cell wall organization	65	1	0.04	0.039
27	GO:0006979	response to oxidative stress	73	1	0.04	0.044
27	GO:0071554	cell wall organization or biogenesis	79	1	0.05	0.048
28	GO:0006099	tricarboxylic acid cycle	17	1	0	0.0021
28	GO:0006101	citrate metabolic process	17	1	0	0.0021
28	GO:0009060	aerobic respiration	18	1	0	0.0022
28	GO:0072350	tricarboxylic acid metabolic process	22	1	0	0.0027
28	GO:0045333	cellular respiration	36	1	0	0.0044
28	GO:0015980	energy derivation by oxidation of organic compounds	44	1	0.01	0.0054
28	GO:0006091	generation of precursor metabolites and energy	123	1	0.02	0.0151
29	GO:0055114	oxidation-reduction process	1060	4	0.65	0.0013
29	GO:0044242	cellular lipid catabolic process	10	1	0.01	0.0061
29	GO:0016042	lipid catabolic process	17	1	0.01	0.0104
29	GO:0016054	organic acid catabolic process	27	1	0.02	0.0165
29	GO:0046395	carboxylic acid catabolic process	27	1	0.02	0.0165
29	GO:0044710	single-organism metabolic process	2091	4	1.29	0.0174
29	GO:0030258	lipid modification	33	1	0.02	0.0202
29	GO:0044282	small molecule catabolic process	33	1	0.02	0.0202
29	GO:0006631	fatty acid metabolic process	71	1	0.04	0.043
30	GO:0006855	drug transmembrane transport	47	2	0.05	0.0011
30	GO:0015893	drug transport	47	2	0.05	0.0011
30	GO:0042493	response to drug	47	2	0.05	0.0011
30	GO:0055114	oxidation-reduction process	1060	5	1.17	0.003
30	GO:0042221	response to chemical	87	2	0.1	0.0039
30	GO:0006694	steroid biosynthetic process	13	1	0.01	0.0143
30	GO:0008202	steroid metabolic process	15	1	0.02	0.0165
30	GO:0044699	single-organism process	3618	7	4.01	0.0468
31	GO:0006355	regulation of transcription, DNA-templated	767	3	0.38	0.0031
31	GO:1903506	regulation of nucleic acid-templated transcription	767	3	0.38	0.0031
31	GO:2001141	regulation of RNA biosynthetic process	767	3	0.38	0.0031
31	GO:0051252	regulation of RNA metabolic process	769	3	0.38	0.0031
31	GO:0019219	regulation of nucleobase-containing compound metabolic process	774	3	0.38	0.0032
31	GO:0009889	regulation of biosynthetic process	778	3	0.38	0.0033
31	GO:0010556	regulation of macromolecule biosynthetic process	778	3	0.38	0.0033
31	GO:0031326	regulation of cellular biosynthetic process	778	3	0.38	0.0033
31	GO:2000112	regulation of cellular macromolecule biosynthetic process	778	3	0.38	0.0033
31	GO:0051171	regulation of nitrogen compound metabolic process	782	3	0.39	0.0033
31	GO:0010468	regulation of gene expression	791	3	0.39	0.0034
31	GO:0080090	regulation of primary metabolic process	801	3	0.39	0.0035
31	GO:0031323	regulation of cellular metabolic process	802	3	0.39	0.0036
31	GO:0060255	regulation of macromolecule metabolic process	817	3	0.4	0.0038
31	GO:0019222	regulation of metabolic process	823	3	0.41	0.0038
31	GO:0006351	transcription, DNA-templated	865	3	0.43	0.0044
31	GO:0032774	RNA biosynthetic process	865	3	0.43	0.0044
31	GO:0097659	nucleic acid-templated transcription	865	3	0.43	0.0044
31	GO:0034654	nucleobase-containing compound biosynthetic process	968	3	0.48	0.0061
31	GO:0019438	aromatic compound biosynthetic process	1055	3	0.52	0.0079
31	GO:0018130	heterocycle biosynthetic process	1068	3	0.53	0.0082
31	GO:0016070	RNA metabolic process	1087	3	0.54	0.0086
31	GO:1901362	organic cyclic compound biosynthetic process	1099	3	0.54	0.0089
31	GO:0050794	regulation of cellular process	1249	3	0.61	0.0128
31	GO:0090304	nucleic acid metabolic process	1252	3	0.62	0.0129
31	GO:0050789	regulation of biological process	1283	3	0.63	0.0139
31	GO:0065007	biological regulation	1311	3	0.65	0.0148
31	GO:0034645	cellular macromolecule biosynthetic process	1453	3	0.72	0.0198
31	GO:0009059	macromolecule biosynthetic process	1454	3	0.72	0.0198
31	GO:0010467	gene expression	1493	3	0.74	0.0214
31	GO:0006139	nucleobase-containing compound metabolic process	1499	3	0.74	0.0216
31	GO:0044271	cellular nitrogen compound biosynthetic process	1500	3	0.74	0.0217
31	GO:0046483	heterocycle metabolic process	1612	3	0.79	0.0266
31	GO:0006725	cellular aromatic compound metabolic process	1644	3	0.81	0.0281
31	GO:1901360	organic cyclic compound metabolic process	1676	3	0.83	0.0297
31	GO:0044249	cellular biosynthetic process	1922	3	0.95	0.0435
31	GO:1901576	organic substance biosynthetic process	1943	3	0.96	0.0449
32	GO:0009308	amine metabolic process	58	1	0.01	0.0071
34	GO:0022900	electron transport chain	38	5	0.05	7.7e-10
34	GO:0006091	generation of precursor metabolites and energy	123	6	0.17	4.6e-09
34	GO:0015979	photosynthesis	80	5	0.11	3.6e-08
34	GO:0019684	photosynthesis, light reaction	16	3	0.02	1e-06
34	GO:0045333	cellular respiration	36	3	0.05	1.3e-05
34	GO:0015980	energy derivation by oxidation of organic compounds	44	3	0.06	2.4e-05
34	GO:0022904	respiratory electron transport chain	18	2	0.02	0.00025
34	GO:0055114	oxidation-reduction process	1060	6	1.44	0.00125
34	GO:0044710	single-organism metabolic process	2091	8	2.83	0.00145
34	GO:0044237	cellular metabolic process	4137	10	5.6	0.0069
34	GO:0046034	ATP metabolic process	98	2	0.13	0.00738
34	GO:0009144	purine nucleoside triphosphate metabolic process	105	2	0.14	0.00843
34	GO:0009199	ribonucleoside triphosphate metabolic process	105	2	0.14	0.00843
34	GO:0009205	purine ribonucleoside triphosphate metabolic process	105	2	0.14	0.00843
34	GO:0009141	nucleoside triphosphate metabolic process	108	2	0.15	0.00891
34	GO:0009126	purine nucleoside monophosphate metabolic process	109	2	0.15	0.00907
34	GO:0009167	purine ribonucleoside monophosphate metabolic process	109	2	0.15	0.00907
34	GO:0009161	ribonucleoside monophosphate metabolic process	114	2	0.15	0.00988
34	GO:0009123	nucleoside monophosphate metabolic process	116	2	0.16	0.01022
34	GO:0042278	purine nucleoside metabolic process	126	2	0.17	0.01198
34	GO:0046128	purine ribonucleoside metabolic process	126	2	0.17	0.01198
34	GO:0009150	purine ribonucleotide metabolic process	129	2	0.17	0.01253
34	GO:0009259	ribonucleotide metabolic process	132	2	0.18	0.01309
34	GO:0009119	ribonucleoside metabolic process	133	2	0.18	0.01328
34	GO:0006163	purine nucleotide metabolic process	135	2	0.18	0.01367
34	GO:0009116	nucleoside metabolic process	149	2	0.2	0.01649
34	GO:0072521	purine-containing compound metabolic process	149	2	0.2	0.01649
34	GO:1901657	glycosyl compound metabolic process	149	2	0.2	0.01649
34	GO:0019693	ribose phosphate metabolic process	151	2	0.2	0.01691
34	GO:0044763	single-organism cellular process	2362	7	3.2	0.01805
34	GO:0006119	oxidative phosphorylation	14	1	0.02	0.01881
34	GO:0042773	ATP synthesis coupled electron transport	14	1	0.02	0.01881
34	GO:0009060	aerobic respiration	18	1	0.02	0.02412
34	GO:0009117	nucleotide metabolic process	191	2	0.26	0.0263
34	GO:0006753	nucleoside phosphate metabolic process	195	2	0.26	0.02734
34	GO:0015988	energy coupled proton transmembrane transport, against electrochemical gradient	22	1	0.03	0.02941
34	GO:0015991	ATP hydrolysis coupled proton transport	22	1	0.03	0.02941
34	GO:0015985	energy coupled proton transport, down electrochemical gradient	23	1	0.03	0.03072
34	GO:0015986	ATP synthesis coupled proton transport	23	1	0.03	0.03072
34	GO:0055086	nucleobase-containing small molecule metabolic process	229	2	0.31	0.0368
34	GO:0006754	ATP biosynthetic process	31	1	0.04	0.04121

## Sheet: Local eGenes GO enrichment
GO.ID	Term	Annotated	Significant	Expected	p.value
GO:0006399	tRNA metabolic process	76	35	18.02	1.5e-05
GO:1901566	organonitrogen compound biosynthetic process	736	221	174.49	2.2e-05
GO:0034660	ncRNA metabolic process	102	43	24.18	2.6e-05
GO:0043604	amide biosynthetic process	454	140	107.63	0.00021
GO:0006412	translation	436	135	103.36	0.00022
GO:0043043	peptide biosynthetic process	441	136	104.55	0.00026
GO:0043603	cellular amide metabolic process	475	145	112.61	0.00027
GO:1901564	organonitrogen compound metabolic process	997	281	236.36	0.00028
GO:0006518	peptide metabolic process	453	139	107.4	0.00028
GO:0051128	regulation of cellular component organization	23	13	5.45	0.00071
GO:0008033	tRNA processing	40	19	9.48	0.00084
GO:0006396	RNA processing	165	57	39.12	0.00098
GO:0034470	ncRNA processing	66	27	15.65	0.00139
GO:0043624	cellular protein complex disassembly	14	9	3.32	0.00142
GO:0006505	GPI anchor metabolic process	12	8	2.84	0.00191
GO:0044699	single-organism process	3608	911	855.37	0.00192
GO:0051186	cofactor metabolic process	160	54	37.93	0.00236
GO:0006415	translational termination	10	7	2.37	0.00251
GO:0006497	protein lipidation	10	7	2.37	0.00251
GO:0006506	GPI anchor biosynthetic process	10	7	2.37	0.00251
GO:0042157	lipoprotein metabolic process	10	7	2.37	0.00251
GO:0042158	lipoprotein biosynthetic process	10	7	2.37	0.00251
GO:0044087	regulation of cellular component biogenesis	10	7	2.37	0.00251
GO:0022411	cellular component disassembly	15	9	3.56	0.00281
GO:0032984	macromolecular complex disassembly	15	9	3.56	0.00281
GO:0043241	protein complex disassembly	15	9	3.56	0.00281
GO:0044710	single-organism metabolic process	2076	539	492.17	0.00293
GO:0072528	pyrimidine-containing compound biosynthetic process	35	16	8.3	0.00347
GO:0072594	establishment of protein localization to organelle	21	11	4.98	0.00411
GO:0044763	single-organism cellular process	2352	604	557.6	0.00429
GO:0006766	vitamin metabolic process	24	12	5.69	0.0045
GO:0006767	water-soluble vitamin metabolic process	24	12	5.69	0.0045
GO:0006418	tRNA aminoacylation for protein translation	36	16	8.53	0.00489
GO:0043038	amino acid activation	36	16	8.53	0.00489
GO:0043039	tRNA aminoacylation	36	16	8.53	0.00489
GO:0008654	phospholipid biosynthetic process	33	15	7.82	0.00492
GO:0000278	mitotic cell cycle	16	9	3.79	0.00509
GO:0009247	glycolipid biosynthetic process	16	9	3.79	0.00509
GO:0046467	membrane lipid biosynthetic process	16	9	3.79	0.00509
GO:1903047	mitotic cell cycle process	16	9	3.79	0.00509
GO:0006661	phosphatidylinositol biosynthetic process	11	7	2.61	0.00549
GO:0072527	pyrimidine-containing compound metabolic process	38	16	9.01	0.00914
GO:0009110	vitamin biosynthetic process	23	11	5.45	0.00979
GO:0042364	water-soluble vitamin biosynthetic process	23	11	5.45	0.00979
GO:0009132	nucleoside diphosphate metabolic process	61	23	14.46	0.00986
GO:0006605	protein targeting	26	12	6.16	0.00996
GO:0090407	organophosphate biosynthetic process	127	42	30.11	0.01002
GO:0006612	protein targeting to membrane	12	7	2.84	0.01049
GO:0006613	cotranslational protein targeting to membrane	12	7	2.84	0.01049
GO:0006614	SRP-dependent cotranslational protein targeting to membrane	12	7	2.84	0.01049
GO:0033043	regulation of organelle organization	12	7	2.84	0.01049
GO:0045047	protein targeting to ER	12	7	2.84	0.01049
GO:0072599	establishment of protein localization to endoplasmic reticulum	12	7	2.84	0.01049
GO:1902582	single-organism intracellular transport	75	27	17.78	0.01093
GO:0009451	RNA modification	42	17	9.96	0.01152
GO:0006801	superoxide metabolic process	15	8	3.56	0.01243
GO:0042440	pigment metabolic process	36	15	8.53	0.01277
GO:0006165	nucleoside diphosphate phosphorylation	59	22	13.99	0.01321
GO:0046939	nucleotide phosphorylation	59	22	13.99	0.01321
GO:0006732	coenzyme metabolic process	133	43	31.53	0.01407
GO:0033365	protein localization to organelle	27	12	6.4	0.01413
GO:0051188	cofactor biosynthetic process	73	26	17.31	0.01435
GO:0006206	pyrimidine nucleobase metabolic process	10	6	2.37	0.0151
GO:0007067	mitotic nuclear division	10	6	2.37	0.0151
GO:0009218	pyrimidine ribonucleotide metabolic process	10	6	2.37	0.0151
GO:0009220	pyrimidine ribonucleotide biosynthetic process	10	6	2.37	0.0151
GO:0019856	pyrimidine nucleobase biosynthetic process	10	6	2.37	0.0151
GO:0046132	pyrimidine ribonucleoside biosynthetic process	10	6	2.37	0.0151
GO:0046134	pyrimidine nucleoside biosynthetic process	10	6	2.37	0.0151
GO:0019538	protein metabolic process	2030	517	481.26	0.01724
GO:1902580	single-organism cellular localization	31	13	7.35	0.01871
GO:0032259	methylation	44	17	10.43	0.0191
GO:0044711	single-organism biosynthetic process	523	144	123.99	0.02022
GO:0006664	glycolipid metabolic process	22	10	5.22	0.0205
GO:1903509	liposaccharide metabolic process	22	10	5.22	0.0205
GO:0044281	small molecule metabolic process	706	190	167.38	0.02123
GO:0018193	peptidyl-amino acid modification	48	18	11.38	0.02231
GO:1901137	carbohydrate derivative biosynthetic process	126	40	29.87	0.02355
GO:0046488	phosphatidylinositol metabolic process	45	17	10.67	0.02409
GO:0019637	organophosphate metabolic process	288	83	68.28	0.02411
GO:0033013	tetrapyrrole metabolic process	32	13	7.59	0.02484
GO:0006091	generation of precursor metabolites and energy	123	39	29.16	0.02561
GO:0016482	cytoplasmic transport	80	27	18.97	0.02645
GO:0006778	porphyrin-containing compound metabolic process	26	11	6.16	0.0276
GO:0006643	membrane lipid metabolic process	23	10	5.45	0.02874
GO:0000280	nuclear division	14	7	3.32	0.02896
GO:0046474	glycerophospholipid biosynthetic process	17	8	4.03	0.02972
GO:0070972	protein localization to endoplasmic reticulum	17	8	4.03	0.02972
GO:0072593	reactive oxygen species metabolic process	17	8	4.03	0.02972
GO:0006720	isoprenoid metabolic process	40	15	9.48	0.03526
GO:0008299	isoprenoid biosynthetic process	40	15	9.48	0.03526
GO:0006563	L-serine metabolic process	24	10	5.69	0.03907
GO:0071702	organic substance transport	314	88	74.44	0.04039
GO:0009108	coenzyme biosynthetic process	51	18	12.09	0.04116
GO:0071705	nitrogen compound transport	51	18	12.09	0.04116
GO:0006213	pyrimidine nucleoside metabolic process	12	6	2.84	0.04277
GO:0006839	mitochondrial transport	12	6	2.84	0.04277
GO:0018205	peptidyl-lysine modification	12	6	2.84	0.04277
GO:0046131	pyrimidine ribonucleoside metabolic process	12	6	2.84	0.04277
GO:0046148	pigment biosynthetic process	31	12	7.35	0.04462
GO:0006090	pyruvate metabolic process	55	19	13.04	0.04521
GO:0006644	phospholipid metabolic process	80	26	18.97	0.04559
GO:0016043	cellular component organization	324	90	76.81	0.04714
GO:0072524	pyridine-containing compound metabolic process	84	27	19.91	0.04808
GO:0006096	glycolytic process	52	18	12.33	0.04945
GO:0006757	ATP generation from ADP	52	18	12.33	0.04945
GO:0009135	purine nucleoside diphosphate metabolic process	52	18	12.33	0.04945
GO:0009179	purine ribonucleoside diphosphate metabolic process	52	18	12.33	0.04945
GO:0009185	ribonucleoside diphosphate metabolic process	52	18	12.33	0.04945
GO:0046031	ADP metabolic process	52	18	12.33	0.04945
GO:0006996	organelle organization	155	46	36.75	0.05007
GO:0071822	protein complex subunit organization	99	31	23.47	0.05043
GO:0043933	macromolecular complex subunit organization	133	40	31.53	0.05338
GO:0044267	cellular protein metabolic process	1730	436	410.14	0.05359
GO:0043623	cellular protein complex assembly	49	17	11.62	0.05413
GO:0006221	pyrimidine nucleotide biosynthetic process	22	9	5.22	0.05531
GO:0072657	protein localization to membrane	22	9	5.22	0.05531
GO:0090150	establishment of protein localization to membrane	22	9	5.22	0.05531
GO:0006721	terpenoid metabolic process	19	8	4.5	0.0588
GO:0016114	terpenoid biosynthetic process	19	8	4.5	0.0588
GO:0048285	organelle fission	19	8	4.5	0.0588
GO:0006733	oxidoreduction coenzyme metabolic process	82	26	19.44	0.06015
GO:0009141	nucleoside triphosphate metabolic process	108	33	25.6	0.061
GO:0006400	tRNA modification	16	7	3.79	0.06185
GO:0046112	nucleobase biosynthetic process	16	7	3.79	0.06185
GO:0006082	organic acid metabolic process	427	115	101.23	0.06187
GO:0044724	single-organism carbohydrate catabolic process	57	19	13.51	0.06331
GO:0006904	vesicle docking involved in exocytosis	10	5	2.37	0.06382
GO:0022406	membrane docking	10	5	2.37	0.06382
GO:0048278	vesicle docking	10	5	2.37	0.06382
GO:0044702	single organism reproductive process	79	25	18.73	0.06571
GO:0044270	cellular nitrogen compound catabolic process	26	10	6.16	0.06674
GO:0046700	heterocycle catabolic process	26	10	6.16	0.06674
GO:0006457	protein folding	143	42	33.9	0.06827
GO:0019752	carboxylic acid metabolic process	421	113	99.81	0.06902
GO:0000413	protein peptidyl-prolyl isomerization	33	12	7.82	0.07029
GO:0018208	peptidyl-proline modification	33	12	7.82	0.07029
GO:0006220	pyrimidine nucleotide metabolic process	23	9	5.45	0.0724
GO:0044802	single-organism membrane organization	23	9	5.45	0.0724
GO:0043436	oxoacid metabolic process	426	114	100.99	0.07298
GO:0006810	transport	1209	307	286.62	0.07325
GO:0019362	pyridine nucleotide metabolic process	80	25	18.97	0.07485
GO:0046496	nicotinamide nucleotide metabolic process	80	25	18.97	0.07485
GO:0051234	establishment of localization	1218	309	288.76	0.07521
GO:0071840	cellular component organization or biogenesis	380	102	90.09	0.08062
GO:0015031	protein transport	211	59	50.02	0.08394
GO:0033014	tetrapyrrole biosynthetic process	27	10	6.4	0.08432
GO:0009112	nucleobase metabolic process	17	7	4.03	0.08434
GO:0051179	localization	1227	310	290.89	0.08817
GO:0008037	cell recognition	74	23	17.54	0.0894
GO:0009856	pollination	74	23	17.54	0.0894
GO:0009875	pollen-pistil interaction	74	23	17.54	0.0894
GO:0044706	multi-multicellular organism process	74	23	17.54	0.0894
GO:0048544	recognition of pollen	74	23	17.54	0.0894
GO:0015994	chlorophyll metabolic process	14	6	3.32	0.09009
GO:0045184	establishment of protein localization	220	61	52.16	0.09152
GO:0008610	lipid biosynthetic process	162	46	38.41	0.09452
GO:0007010	cytoskeleton organization	31	11	7.35	0.09476
GO:0006771	riboflavin metabolic process	11	5	2.61	0.0948
GO:0009231	riboflavin biosynthetic process	11	5	2.61	0.0948
GO:0042726	flavin-containing compound metabolic process	11	5	2.61	0.0948
GO:0042727	flavin-containing compound biosynthetic process	11	5	2.61	0.0948
GO:0009144	purine nucleoside triphosphate metabolic process	105	31	24.89	0.09961
GO:0009199	ribonucleoside triphosphate metabolic process	105	31	24.89	0.09961
GO:0009205	purine ribonucleoside triphosphate metabolic process	105	31	24.89	0.09961
GO:0006779	porphyrin-containing compound biosynthetic process	21	8	4.98	0.10124
GO:0009069	serine family amino acid metabolic process	35	12	8.3	0.10394
GO:0046907	intracellular transport	219	60	51.92	0.11214
GO:0051649	establishment of localization in cell	243	66	57.61	0.11443
GO:0045017	glycerolipid biosynthetic process	25	9	5.93	0.11529
GO:0008104	protein localization	228	62	54.05	0.12062
GO:0001522	pseudouridine synthesis	15	6	3.56	0.1212
GO:0006520	cellular amino acid metabolic process	244	66	57.85	0.12186
GO:0033036	macromolecule localization	272	73	64.48	0.12328
GO:0043414	macromolecule methylation	36	12	8.53	0.1238
GO:0033554	cellular response to stress	92	27	21.81	0.12499
GO:0008380	RNA splicing	22	8	5.22	0.12748
GO:0051726	regulation of cell cycle	22	8	5.22	0.12748
GO:0006265	DNA topological change	12	5	2.84	0.13197
GO:0015995	chlorophyll biosynthetic process	12	5	2.84	0.13197
GO:0007049	cell cycle	55	17	13.04	0.1363
GO:0009163	nucleoside biosynthetic process	55	17	13.04	0.1363
GO:0042455	ribonucleoside biosynthetic process	55	17	13.04	0.1363
GO:1901659	glycosyl compound biosynthetic process	55	17	13.04	0.1363
GO:0006081	cellular aldehyde metabolic process	33	11	7.82	0.13708
GO:1901135	carbohydrate derivative metabolic process	274	73	64.96	0.13831
GO:0022402	cell cycle process	37	12	8.77	0.14563
GO:0044723	single-organism carbohydrate metabolic process	247	66	58.56	0.146
GO:0000003	reproduction	86	25	20.39	0.14759
GO:0022414	reproductive process	86	25	20.39	0.14759
GO:0016052	carbohydrate catabolic process	67	20	15.88	0.1487
GO:0005996	monosaccharide metabolic process	52	16	12.33	0.14988
GO:0006364	rRNA processing	30	10	7.11	0.15214
GO:0016072	rRNA metabolic process	30	10	7.11	0.15214
GO:0061024	membrane organization	30	10	7.11	0.15214
GO:0009119	ribonucleoside metabolic process	133	37	31.53	0.15356
GO:0006414	translational elongation	23	8	5.45	0.15686
GO:0032268	regulation of cellular protein metabolic process	23	8	5.45	0.15686
GO:0048193	Golgi vesicle transport	23	8	5.45	0.15686
GO:0044703	multi-organism reproductive process	79	23	18.73	0.15788
GO:0006650	glycerophospholipid metabolic process	60	18	14.22	0.15887
GO:0032501	multicellular organismal process	87	25	20.63	0.1627
GO:0044255	cellular lipid metabolic process	209	56	49.55	0.16319
GO:0051641	cellular localization	261	69	61.88	0.16341
GO:0006508	proteolysis	374	97	88.67	0.16458
GO:0006629	lipid metabolic process	358	93	84.87	0.16598
GO:0051258	protein polymerization	27	9	6.4	0.16933
GO:0009100	glycoprotein metabolic process	38	12	9.01	0.16935
GO:0009101	glycoprotein biosynthetic process	38	12	9.01	0.16935
GO:0006753	nucleoside phosphate metabolic process	186	50	44.1	0.17248
GO:0003333	amino acid transmembrane transport	20	7	4.74	0.17511
GO:0006006	glucose metabolic process	20	7	4.74	0.17511
GO:0006479	protein methylation	20	7	4.74	0.17511
GO:0006865	amino acid transport	20	7	4.74	0.17511
GO:0008213	protein alkylation	20	7	4.74	0.17511
GO:0009070	serine family amino acid biosynthetic process	20	7	4.74	0.17511
GO:0098656	anion transmembrane transport	20	7	4.74	0.17511
GO:1903825	organic acid transmembrane transport	20	7	4.74	0.17511
GO:0006790	sulfur compound metabolic process	65	19	15.41	0.18144
GO:0006486	protein glycosylation	35	11	8.3	0.18783
GO:0043413	macromolecule glycosylation	35	11	8.3	0.18783
GO:0048518	positive regulation of biological process	24	8	5.69	0.18909
GO:0022607	cellular component assembly	124	34	29.4	0.19012
GO:0032787	monocarboxylic acid metabolic process	136	37	32.24	0.1921
GO:0007005	mitochondrion organization	10	4	2.37	0.19463
GO:1901264	carbohydrate derivative transport	10	4	2.37	0.19463
GO:0006259	DNA metabolic process	168	45	39.83	0.19475
GO:0006281	DNA repair	89	25	21.1	0.19538
GO:0006099	tricarboxylic acid cycle	17	6	4.03	0.19634
GO:0006101	citrate metabolic process	17	6	4.03	0.19634
GO:0044765	single-organism transport	842	210	199.62	0.19835
GO:0051704	multi-organism process	82	23	19.44	0.20991
GO:0006461	protein complex assembly	86	24	20.39	0.21148
GO:0070271	protein complex biogenesis	86	24	20.39	0.21148
GO:0006974	cellular response to DNA damage stimulus	90	25	21.34	0.21287
GO:0046034	ATP metabolic process	98	27	23.23	0.21517
GO:0042278	purine nucleoside metabolic process	126	34	29.87	0.21964
GO:0046128	purine ribonucleoside metabolic process	126	34	29.87	0.21964
GO:0051246	regulation of protein metabolic process	25	8	5.93	0.22381
GO:0034622	cellular macromolecular complex assembly	87	24	20.63	0.23006
GO:1902578	single-organism localization	860	213	203.88	0.23171
GO:0065003	macromolecular complex assembly	95	26	22.52	0.23195
GO:0019693	ribose phosphate metabolic process	151	40	35.8	0.23488
GO:0009060	aerobic respiration	18	6	4.27	0.23908
GO:0055086	nucleobase-containing small molecule metabolic process	220	57	52.16	0.24046
GO:0046486	glycerolipid metabolic process	68	19	16.12	0.24378
GO:0009259	ribonucleotide metabolic process	132	35	31.29	0.25103
GO:0006739	NADP metabolic process	22	7	5.22	0.25151
GO:0072350	tricarboxylic acid metabolic process	22	7	5.22	0.25151
GO:0000105	histidine biosynthetic process	11	4	2.61	0.25168
GO:0001510	RNA methylation	11	4	2.61	0.25168
GO:0006547	histidine metabolic process	11	4	2.61	0.25168
GO:0017038	protein import	11	4	2.61	0.25168
GO:0052803	imidazole-containing compound metabolic process	11	4	2.61	0.25168
GO:1901068	guanosine-containing compound metabolic process	11	4	2.61	0.25168
GO:0016071	mRNA metabolic process	49	14	11.62	0.25733
GO:1902589	single-organism organelle organization	65	18	15.41	0.26516
GO:0009116	nucleoside metabolic process	149	39	35.32	0.26519
GO:1901657	glycosyl compound metabolic process	149	39	35.32	0.26519
GO:0008202	steroid metabolic process	15	5	3.56	0.27152
GO:0009117	nucleotide metabolic process	182	47	43.15	0.27412
GO:0006886	intracellular protein transport	174	45	41.25	0.27585
GO:0009142	nucleoside triphosphate biosynthetic process	38	11	9.01	0.27693
GO:0009145	purine nucleoside triphosphate biosynthetic process	38	11	9.01	0.27693
GO:0009201	ribonucleoside triphosphate biosynthetic process	38	11	9.01	0.27693
GO:0009206	purine ribonucleoside triphosphate biosynthetic process	38	11	9.01	0.27693
GO:0006397	mRNA processing	42	12	9.96	0.28017
GO:0009893	positive regulation of metabolic process	19	6	4.5	0.28424
GO:0051301	cell division	19	6	4.5	0.28424
GO:0042451	purine nucleoside biosynthetic process	50	14	11.85	0.28473
GO:0046129	purine ribonucleoside biosynthetic process	50	14	11.85	0.28473
GO:0009161	ribonucleoside monophosphate metabolic process	114	30	27.03	0.28721
GO:0051276	chromosome organization	86	23	20.39	0.28997
GO:0007186	G-protein coupled receptor signaling pathway	23	7	5.45	0.29292
GO:0015985	energy coupled proton transport, down electrochemical gradient	23	7	5.45	0.29292
GO:0015986	ATP synthesis coupled proton transport	23	7	5.45	0.29292
GO:0048522	positive regulation of cellular process	23	7	5.45	0.29292
GO:0044085	cellular component biogenesis	180	46	42.67	0.30436
GO:0044283	small molecule biosynthetic process	221	56	52.39	0.30572
GO:0048519	negative regulation of biological process	35	10	8.3	0.30679
GO:0019318	hexose metabolic process	43	12	10.19	0.31092
GO:0070085	glycosylation	43	12	10.19	0.31092
GO:0006541	glutamine metabolic process	12	4	2.84	0.31153
GO:0006595	polyamine metabolic process	12	4	2.84	0.31153
GO:0006760	folic acid-containing compound metabolic process	12	4	2.84	0.31153
GO:0006818	hydrogen transport	47	13	11.14	0.31216
GO:0006913	nucleocytoplasmic transport	47	13	11.14	0.31216
GO:0015992	proton transport	47	13	11.14	0.31216
GO:0051169	nuclear transport	47	13	11.14	0.31216
GO:0005975	carbohydrate metabolic process	603	148	142.96	0.32347
GO:0019684	photosynthesis, light reaction	16	5	3.79	0.32366
GO:0034655	nucleobase-containing compound catabolic process	16	5	3.79	0.32366
GO:0009123	nucleoside monophosphate metabolic process	116	30	27.5	0.32474
GO:0009165	nucleotide biosynthetic process	84	22	19.91	0.33467
GO:1901293	nucleoside phosphate biosynthetic process	84	22	19.91	0.33467
GO:0048523	negative regulation of cellular process	24	7	5.69	0.33567
GO:0009892	negative regulation of metabolic process	28	8	6.64	0.33867
GO:0010605	negative regulation of macromolecule metabolic process	28	8	6.64	0.33867
GO:0009150	purine ribonucleotide metabolic process	129	33	30.58	0.33915
GO:0009260	ribonucleotide biosynthetic process	56	15	13.28	0.34139
GO:0046390	ribose phosphate biosynthetic process	56	15	13.28	0.34139
GO:0070838	divalent metal ion transport	40	11	9.48	0.34228
GO:0072511	divalent inorganic cation transport	40	11	9.48	0.34228
GO:0044272	sulfur compound biosynthetic process	48	13	11.38	0.34232
GO:0034613	cellular protein localization	191	48	45.28	0.34674
GO:0070727	cellular macromolecule localization	191	48	45.28	0.34674
GO:0045454	cell redox homeostasis	89	23	21.1	0.35587
GO:0009056	catabolic process	275	68	65.2	0.36588
GO:0008152	metabolic process	6141	1462	1455.88	0.36734
GO:0015672	monovalent inorganic cation transport	102	26	24.18	0.37192
GO:0006694	steroid biosynthetic process	13	4	3.08	0.37243
GO:0006857	oligopeptide transport	13	4	3.08	0.37243
GO:0015833	peptide transport	13	4	3.08	0.37243
GO:0042886	amide transport	13	4	3.08	0.37243
GO:0072525	pyridine-containing compound biosynthetic process	13	4	3.08	0.37243
GO:0006260	DNA replication	49	13	11.62	0.37301
GO:0006163	purine nucleotide metabolic process	135	34	32.01	0.37427
GO:0006310	DNA recombination	17	5	4.03	0.3767
GO:0006544	glycine metabolic process	17	5	4.03	0.3767
GO:0031324	negative regulation of cellular metabolic process	17	5	4.03	0.3767
GO:0006575	cellular modified amino acid metabolic process	33	9	7.82	0.37826
GO:0030258	lipid modification	33	9	7.82	0.37826
GO:0007264	small GTPase mediated signal transduction	90	23	21.34	0.37856
GO:0019682	glyceraldehyde-3-phosphate metabolic process	21	6	4.98	0.37859
GO:0065008	regulation of biological quality	128	32	30.35	0.39803
GO:0008652	cellular amino acid biosynthetic process	120	30	28.45	0.40339
GO:0022900	electron transport chain	38	10	9.01	0.41304
GO:1901607	alpha-amino acid biosynthetic process	100	25	23.71	0.41804
GO:0006793	phosphorus metabolic process	1323	317	313.65	0.41867
GO:0009891	positive regulation of biosynthetic process	18	5	4.27	0.42964
GO:0010557	positive regulation of macromolecule biosynthetic process	18	5	4.27	0.42964
GO:0010604	positive regulation of macromolecule metabolic process	18	5	4.27	0.42964
GO:0010628	positive regulation of gene expression	18	5	4.27	0.42964
GO:0031325	positive regulation of cellular metabolic process	18	5	4.27	0.42964
GO:0031328	positive regulation of cellular biosynthetic process	18	5	4.27	0.42964
GO:0051173	positive regulation of nitrogen compound metabolic process	18	5	4.27	0.42964
GO:0065009	regulation of molecular function	18	5	4.27	0.42964
GO:0042254	ribosome biogenesis	55	14	13.04	0.43113
GO:0042558	pteridine-containing compound metabolic process	14	4	3.32	0.43283
GO:0051172	negative regulation of nitrogen compound metabolic process	14	4	3.32	0.43283
GO:0006796	phosphate-containing compound metabolic process	1321	316	313.18	0.43317
GO:0009126	purine nucleoside monophosphate metabolic process	109	27	25.84	0.4332
GO:0009167	purine ribonucleoside monophosphate metabolic process	109	27	25.84	0.4332
GO:0006535	cysteine biosynthetic process from serine	10	3	2.37	0.43533
GO:1901617	organic hydroxy compound biosynthetic process	10	3	2.37	0.43533
GO:0055085	transmembrane transport	540	130	128.02	0.43539
GO:0042592	homeostatic process	105	26	24.89	0.43664
GO:0016192	vesicle-mediated transport	126	31	29.87	0.44028
GO:0006869	lipid transport	43	11	10.19	0.444
GO:0010876	lipid localization	43	11	10.19	0.444
GO:0071103	DNA conformation change	43	11	10.19	0.444
GO:1901575	organic substance catabolic process	273	66	64.72	0.45052
GO:0015849	organic acid transport	35	9	8.3	0.45411
GO:0046942	carboxylic acid transport	35	9	8.3	0.45411
GO:0055114	oxidation-reduction process	1060	253	251.3	0.461
GO:0030163	protein catabolic process	102	25	24.18	0.46235
GO:0009966	regulation of signal transduction	48	12	11.38	0.47183
GO:0010646	regulation of cell communication	48	12	11.38	0.47183
GO:0015711	organic anion transport	48	12	11.38	0.47183
GO:0023051	regulation of signaling	48	12	11.38	0.47183
GO:0006887	exocytosis	23	6	5.45	0.47331
GO:0010629	negative regulation of gene expression	23	6	5.45	0.47331
GO:0016568	chromatin modification	23	6	5.45	0.47331
GO:0043412	macromolecule modification	1252	298	296.82	0.47862
GO:0072521	purine-containing compound metabolic process	149	36	35.32	0.47982
GO:0044712	single-organism catabolic process	128	31	30.35	0.48
GO:0006098	pentose-phosphate shunt	19	5	4.5	0.48157
GO:0032502	developmental process	19	5	4.5	0.48157
GO:0044767	single-organism developmental process	19	5	4.5	0.48157
GO:0051156	glucose 6-phosphate metabolic process	19	5	4.5	0.48157
GO:1902600	hydrogen ion transmembrane transport	40	10	9.48	0.48438
GO:0006164	purine nucleotide biosynthetic process	57	14	13.51	0.49076
GO:0009152	purine ribonucleotide biosynthetic process	53	13	12.56	0.49707
GO:0006534	cysteine metabolic process	11	3	2.61	0.5042
GO:0006888	ER to Golgi vesicle-mediated transport	11	3	2.61	0.5042
GO:0016458	gene silencing	11	3	2.61	0.5042
GO:0019344	cysteine biosynthetic process	11	3	2.61	0.5042
GO:0031047	gene silencing by RNA	11	3	2.61	0.5042
GO:0042559	pteridine-containing compound biosynthetic process	11	3	2.61	0.5042
GO:0045934	negative regulation of nucleobase-containing compound metabolic process	11	3	2.61	0.5042
GO:0006366	transcription from RNA polymerase II promoter	28	7	6.64	0.50867
GO:0006413	translational initiation	28	7	6.64	0.50867
GO:0032940	secretion by cell	24	6	5.69	0.51919
GO:0046903	secretion	24	6	5.69	0.51919
GO:0006357	regulation of transcription from RNA polymerase II promoter	20	5	4.74	0.53175
GO:0009607	response to biotic stimulus	20	5	4.74	0.53175
GO:1901605	alpha-amino acid metabolic process	148	35	35.09	0.53908
GO:0019725	cellular homeostasis	97	23	23	0.5393
GO:0015748	organophosphate ester transport	16	4	3.79	0.54744
GO:0034220	ion transmembrane transport	123	29	29.16	0.54896
GO:0022613	ribonucleoprotein complex biogenesis	59	14	13.99	0.54903
GO:0016310	phosphorylation	1047	247	248.22	0.55123
GO:0044265	cellular macromolecule catabolic process	102	24	24.18	0.55563
GO:0006662	glycerol ether metabolic process	12	3	2.84	0.56842
GO:0018904	ether metabolic process	12	3	2.84	0.56842
GO:0046839	phospholipid dephosphorylation	12	3	2.84	0.56842
GO:0046856	phosphatidylinositol dephosphorylation	12	3	2.84	0.56842
GO:0044257	cellular protein catabolic process	90	21	21.34	0.57444
GO:0051603	proteolysis involved in cellular protein catabolic process	90	21	21.34	0.57444
GO:0006855	drug transmembrane transport	47	11	11.14	0.57601
GO:0015893	drug transport	47	11	11.14	0.57601
GO:0042493	response to drug	47	11	11.14	0.57601
GO:0006511	ubiquitin-dependent protein catabolic process	73	17	17.31	0.57917
GO:0019941	modification-dependent protein catabolic process	73	17	17.31	0.57917
GO:0043632	modification-dependent macromolecule catabolic process	73	17	17.31	0.57917
GO:0042398	cellular modified amino acid biosynthetic process	21	5	4.98	0.57961
GO:0009057	macromolecule catabolic process	138	32	32.72	0.59065
GO:0006812	cation transport	275	64	65.2	0.59228
GO:0006022	aminoglycan metabolic process	17	4	4.03	0.59998
GO:0006284	base-excision repair	17	4	4.03	0.59998
GO:0016226	iron-sulfur cluster assembly	17	4	4.03	0.59998
GO:0031163	metallo-sulfur cluster assembly	17	4	4.03	0.59998
GO:0050790	regulation of catalytic activity	17	4	4.03	0.59998
GO:0006811	ion transport	374	87	88.67	0.60271
GO:0072522	purine-containing compound biosynthetic process	70	16	16.6	0.61273
GO:0016053	organic acid biosynthetic process	187	43	44.33	0.62004
GO:0046394	carboxylic acid biosynthetic process	187	43	44.33	0.62004
GO:0015988	energy coupled proton transmembrane transport, against electrochemical gradient	22	5	5.22	0.62472
GO:0015991	ATP hydrolysis coupled proton transport	22	5	5.22	0.62472
GO:0090662	ATP hydrolysis coupled transmembrane transport	22	5	5.22	0.62472
GO:0044248	cellular catabolic process	183	42	43.38	0.62476
GO:0000910	cytokinesis	13	3	3.08	0.62722
GO:0005985	sucrose metabolic process	13	3	3.08	0.62722
GO:0009890	negative regulation of biosynthetic process	13	3	3.08	0.62722
GO:0010558	negative regulation of macromolecule biosynthetic process	13	3	3.08	0.62722
GO:0015914	phospholipid transport	13	3	3.08	0.62722
GO:0031327	negative regulation of cellular biosynthetic process	13	3	3.08	0.62722
GO:0051338	regulation of transferase activity	13	3	3.08	0.62722
GO:2000113	negative regulation of cellular macromolecule biosynthetic process	13	3	3.08	0.62722
GO:0006754	ATP biosynthetic process	31	7	7.35	0.6275
GO:0015979	photosynthesis	80	18	18.97	0.64332
GO:0045333	cellular respiration	36	8	8.53	0.64658
GO:0000271	polysaccharide biosynthetic process	54	12	12.8	0.65321
GO:0006325	chromatin organization	54	12	12.8	0.65321
GO:0009250	glucan biosynthetic process	54	12	12.8	0.65321
GO:0033692	cellular polysaccharide biosynthetic process	54	12	12.8	0.65321
GO:0006464	cellular protein modification process	1207	281	286.15	0.65933
GO:0036211	protein modification process	1207	281	286.15	0.65933
GO:0048583	regulation of response to stimulus	59	13	13.99	0.66821
GO:0006820	anion transport	90	20	21.34	0.67014
GO:0006026	aminoglycan catabolic process	14	3	3.32	0.68023
GO:0006030	chitin metabolic process	14	3	3.32	0.68023
GO:0006032	chitin catabolic process	14	3	3.32	0.68023
GO:0006568	tryptophan metabolic process	14	3	3.32	0.68023
GO:0006586	indolalkylamine metabolic process	14	3	3.32	0.68023
GO:0007034	vacuolar transport	14	3	3.32	0.68023
GO:0042430	indole-containing compound metabolic process	14	3	3.32	0.68023
GO:0046348	amino sugar catabolic process	14	3	3.32	0.68023
GO:1901071	glucosamine-containing compound metabolic process	14	3	3.32	0.68023
GO:1901072	glucosamine-containing compound catabolic process	14	3	3.32	0.68023
GO:0016569	covalent chromatin modification	19	4	4.5	0.6932
GO:0016570	histone modification	19	4	4.5	0.6932
GO:0044282	small molecule catabolic process	33	7	7.82	0.69694
GO:0006816	calcium ion transport	24	5	5.69	0.70562
GO:0071804	cellular potassium ion transport	24	5	5.69	0.70562
GO:0071805	potassium ion transmembrane transport	24	5	5.69	0.70562
GO:0009156	ribonucleoside monophosphate biosynthetic process	47	10	11.14	0.70657
GO:1901565	organonitrogen compound catabolic process	47	10	11.14	0.70657
GO:0007154	cell communication	427	97	101.23	0.70768
GO:0006576	cellular biogenic amine metabolic process	38	8	9.01	0.70988
GO:0044106	cellular amine metabolic process	38	8	9.01	0.70988
GO:0030243	cellulose metabolic process	29	6	6.88	0.71732
GO:0030244	cellulose biosynthetic process	29	6	6.88	0.71732
GO:0000079	regulation of cyclin-dependent protein serine/threonine kinase activity	10	2	2.37	0.72577
GO:0006298	mismatch repair	10	2	2.37	0.72577
GO:0006596	polyamine biosynthetic process	10	2	2.37	0.72577
GO:0015936	coenzyme A metabolic process	10	2	2.37	0.72577
GO:0043549	regulation of kinase activity	10	2	2.37	0.72577
GO:0044242	cellular lipid catabolic process	10	2	2.37	0.72577
GO:0045859	regulation of protein kinase activity	10	2	2.37	0.72577
GO:0071900	regulation of protein serine/threonine kinase activity	10	2	2.37	0.72577
GO:1901700	response to oxygen-containing compound	10	2	2.37	0.72577
GO:1904029	regulation of cyclin-dependent protein kinase activity	10	2	2.37	0.72577
GO:0000375	RNA splicing, via transesterification reactions	15	3	3.56	0.72741
GO:0000377	RNA splicing, via transesterification reactions with bulged adenosine as nucleophile	15	3	3.56	0.72741
GO:0000398	mRNA splicing, via spliceosome	15	3	3.56	0.72741
GO:0006040	amino sugar metabolic process	15	3	3.56	0.72741
GO:0031399	regulation of protein modification process	15	3	3.56	0.72741
GO:0006352	DNA-templated transcription, initiation	34	7	8.06	0.72829
GO:0019439	aromatic compound catabolic process	57	12	13.51	0.72972
GO:1901361	organic cyclic compound catabolic process	57	12	13.51	0.72972
GO:0006631	fatty acid metabolic process	71	15	16.83	0.73866
GO:0009073	aromatic amino acid family biosynthetic process	25	5	5.93	0.74118
GO:0015980	energy derivation by oxidation of organic compounds	44	9	10.43	0.74826
GO:0098655	cation transmembrane transport	103	22	24.42	0.7484
GO:0098660	inorganic ion transmembrane transport	103	22	24.42	0.7484
GO:0098662	inorganic cation transmembrane transport	103	22	24.42	0.7484
GO:0009124	nucleoside monophosphate biosynthetic process	49	10	11.62	0.75739
GO:0051273	beta-glucan metabolic process	40	8	9.48	0.76526
GO:0051274	beta-glucan biosynthetic process	40	8	9.48	0.76526
GO:0051716	cellular response to stimulus	443	99	105.02	0.77205
GO:0009312	oligosaccharide biosynthetic process	26	5	6.16	0.77347
GO:0001932	regulation of protein phosphorylation	11	2	2.61	0.77501
GO:0006074	(1->3)-beta-D-glucan metabolic process	11	2	2.61	0.77501
GO:0006075	(1->3)-beta-D-glucan biosynthetic process	11	2	2.61	0.77501
GO:0010035	response to inorganic substance	11	2	2.61	0.77501
GO:0042325	regulation of phosphorylation	11	2	2.61	0.77501
GO:0006979	response to oxidative stress	73	15	17.31	0.77817
GO:0006323	DNA packaging	31	6	7.35	0.77845
GO:0006333	chromatin assembly or disassembly	31	6	7.35	0.77845
GO:0006468	protein phosphorylation	949	216	224.98	0.77878
GO:0016311	dephosphorylation	74	15	17.54	0.7963
GO:0000097	sulfur amino acid biosynthetic process	22	4	5.22	0.80202
GO:0009084	glutamine family amino acid biosynthetic process	22	4	5.22	0.80202
GO:0016054	organic acid catabolic process	27	5	6.4	0.80257
GO:0046395	carboxylic acid catabolic process	27	5	6.4	0.80257
GO:0016042	lipid catabolic process	17	3	4.03	0.80515
GO:0070588	calcium ion transmembrane transport	17	3	4.03	0.80515
GO:0009072	aromatic amino acid family metabolic process	42	8	9.96	0.8126
GO:0016485	protein processing	12	2	2.84	0.81632
GO:0019220	regulation of phosphate metabolic process	12	2	2.84	0.81632
GO:0051174	regulation of phosphorus metabolic process	12	2	2.84	0.81632
GO:0051604	protein maturation	12	2	2.84	0.81632
GO:0016051	carbohydrate biosynthetic process	85	17	20.15	0.82478
GO:0006633	fatty acid biosynthetic process	62	12	14.7	0.83079
GO:0072330	monocarboxylic acid biosynthetic process	67	13	15.88	0.83537
GO:0007018	microtubule-based movement	72	14	17.07	0.83987
GO:0006073	cellular glucan metabolic process	77	15	18.25	0.84429
GO:0044042	glucan metabolic process	77	15	18.25	0.84429
GO:0044264	cellular polysaccharide metabolic process	77	15	18.25	0.84429
GO:0009064	glutamine family amino acid metabolic process	34	6	8.06	0.85064
GO:0007275	multicellular organism development	13	2	3.08	0.85071
GO:0033865	nucleoside bisphosphate metabolic process	13	2	3.08	0.85071
GO:0033875	ribonucleoside bisphosphate metabolic process	13	2	3.08	0.85071
GO:0034032	purine nucleoside bisphosphate metabolic process	13	2	3.08	0.85071
GO:0044707	single-multicellular organism process	13	2	3.08	0.85071
GO:0009311	oligosaccharide metabolic process	39	7	9.25	0.85097
GO:0006334	nucleosome assembly	29	5	6.88	0.85183
GO:0031497	chromatin assembly	29	5	6.88	0.85183
GO:0034728	nucleosome organization	29	5	6.88	0.85183
GO:0009309	amine biosynthetic process	19	3	4.5	0.86332
GO:0042401	cellular biogenic amine biosynthetic process	19	3	4.5	0.86332
GO:1901606	alpha-amino acid catabolic process	19	3	4.5	0.86332
GO:0006813	potassium ion transport	40	7	9.48	0.86915
GO:1901615	organic hydroxy compound metabolic process	30	5	7.11	0.87234
GO:0000096	sulfur amino acid metabolic process	25	4	5.93	0.87723
GO:0000226	microtubule cytoskeleton organization	14	2	3.32	0.87912
GO:0006119	oxidative phosphorylation	14	2	3.32	0.87912
GO:0042773	ATP synthesis coupled electron transport	14	2	3.32	0.87912
GO:0043094	cellular metabolic compound salvage	14	2	3.32	0.87912
GO:0006928	movement of cell or subcellular component	75	14	17.78	0.88066
GO:0034637	cellular carbohydrate biosynthetic process	80	15	18.97	0.88315
GO:0006952	defense response	46	8	10.91	0.88491
GO:0000041	transition metal ion transport	20	3	4.74	0.88621
GO:0015698	inorganic anion transport	31	5	7.35	0.8904
GO:0065004	protein-DNA complex assembly	31	5	7.35	0.8904
GO:0071824	protein-DNA complex subunit organization	31	5	7.35	0.8904
GO:0007017	microtubule-based process	114	22	27.03	0.89195
GO:0035556	intracellular signal transduction	170	34	40.3	0.89422
GO:0009127	purine nucleoside monophosphate biosynthetic process	42	7	9.96	0.90003
GO:0009168	purine ribonucleoside monophosphate biosynthetic process	42	7	9.96	0.90003
GO:0006108	malate metabolic process	15	2	3.56	0.90246
GO:0045893	positive regulation of transcription, DNA-templated	15	2	3.56	0.90246
GO:0045935	positive regulation of nucleobase-containing compound metabolic process	15	2	3.56	0.90246
GO:0051254	positive regulation of RNA metabolic process	15	2	3.56	0.90246
GO:1902680	positive regulation of RNA biosynthetic process	15	2	3.56	0.90246
GO:1903508	positive regulation of nucleic acid-templated transcription	15	2	3.56	0.90246
GO:0071704	organic substance metabolic process	4700	1090	1114.25	0.90444
GO:0006950	response to stress	290	60	68.75	0.90484
GO:0030001	metal ion transport	190	38	45.04	0.90552
GO:0009063	cellular amino acid catabolic process	21	3	4.98	0.90562
GO:0005976	polysaccharide metabolic process	87	16	20.63	0.90611
GO:0042221	response to chemical	87	16	20.63	0.90611
GO:0009308	amine metabolic process	58	10	13.75	0.91017
GO:0044262	cellular carbohydrate metabolic process	126	24	29.87	0.91342
GO:0006470	protein dephosphorylation	54	9	12.8	0.92122
GO:0007165	signal transduction	349	72	82.74	0.92763
GO:0023052	signaling	349	72	82.74	0.92763
GO:0044700	single organism signaling	349	72	82.74	0.92763
GO:0000272	polysaccharide catabolic process	10	1	2.37	0.93331
GO:0019751	polyol metabolic process	10	1	2.37	0.93331
GO:0042439	ethanolamine-containing compound metabolic process	10	1	2.37	0.93331
GO:0046470	phosphatidylcholine metabolic process	10	1	2.37	0.93331
GO:1901136	carbohydrate derivative catabolic process	23	3	5.45	0.9357
GO:0097164	ammonium ion metabolic process	17	2	4.03	0.93705
GO:0044237	cellular metabolic process	4024	924	953.99	0.9442
GO:0006066	alcohol metabolic process	24	3	5.69	0.94716
GO:0009067	aspartate family amino acid biosynthetic process	24	3	5.69	0.94716
GO:0046351	disaccharide biosynthetic process	24	3	5.69	0.94716
GO:0034641	cellular nitrogen compound metabolic process	2044	458	484.58	0.94873
GO:0009086	methionine biosynthetic process	11	1	2.61	0.94914
GO:0022904	respiratory electron transport chain	18	2	4.27	0.94962
GO:0043648	dicarboxylic acid metabolic process	36	5	8.53	0.95118
GO:0000160	phosphorelay signal transduction system	58	9	13.75	0.9539
GO:0006525	arginine metabolic process	12	1	2.84	0.96121
GO:0006807	nitrogen compound metabolic process	2257	505	535.08	0.96296
GO:0009664	plant-type cell wall organization	26	3	6.16	0.9646
GO:0071669	plant-type cell wall organization or biogenesis	26	3	6.16	0.9646
GO:0006555	methionine metabolic process	13	1	3.08	0.97042
GO:0044238	primary metabolic process	4509	1032	1068.97	0.97534
GO:0009066	aspartate family amino acid metabolic process	28	3	6.64	0.97651
GO:0009987	cellular process	5411	1247	1282.81	0.97747
GO:0009719	response to endogenous stimulus	29	3	6.88	0.98092
GO:0009725	response to hormone	29	3	6.88	0.98092
GO:0010033	response to organic substance	29	3	6.88	0.98092
GO:0008272	sulfate transport	15	1	3.56	0.9828
GO:0072348	sulfur compound transport	15	1	3.56	0.9828
GO:0005984	disaccharide metabolic process	36	4	8.53	0.98329
GO:0050896	response to stimulus	719	146	170.46	0.98991
GO:0042545	cell wall modification	39	4	9.25	0.99075
GO:0009698	phenylpropanoid metabolic process	26	2	6.16	0.99208
GO:0009808	lignin metabolic process	26	2	6.16	0.99208
GO:0019748	secondary metabolic process	26	2	6.16	0.99208
GO:0046271	phenylpropanoid catabolic process	26	2	6.16	0.99208
GO:0046274	lignin catabolic process	26	2	6.16	0.99208
GO:0043170	macromolecule metabolic process	3338	745	791.36	0.9936
GO:0009058	biosynthetic process	2062	447	488.85	0.99467
GO:0071554	cell wall organization or biogenesis	79	10	18.73	0.99549
GO:0045229	external encapsulating structure organization	65	7	15.41	0.99763
GO:0071555	cell wall organization	65	7	15.41	0.99763
GO:0005991	trehalose metabolic process	23	1	5.45	0.99804
GO:1901576	organic substance biosynthetic process	1943	414	460.64	0.99816
GO:0044249	cellular biosynthetic process	1922	408	455.66	0.99856
GO:0044260	cellular macromolecule metabolic process	3014	660	714.55	0.99857
GO:0016567	protein ubiquitination	77	8	18.25	0.99918
GO:0032446	protein modification by small protein conjugation	79	8	18.73	0.99943
GO:0070647	protein modification by small protein conjugation or removal	80	8	18.97	0.99953
GO:0046483	heterocycle metabolic process	1612	331	382.17	0.99969
GO:1901360	organic cyclic compound metabolic process	1676	343	397.34	0.99983
GO:0010467	gene expression	1488	297	352.77	0.99994
GO:0006725	cellular aromatic compound metabolic process	1644	331	389.75	0.99995
GO:0044271	cellular nitrogen compound biosynthetic process	1500	295	355.61	0.99999
GO:0006139	nucleobase-containing compound metabolic process	1499	292	355.38	0.99999
GO:0009059	macromolecule biosynthetic process	1454	281	344.71	1
GO:0034645	cellular macromolecule biosynthetic process	1453	280	344.47	1
GO:0090304	nucleic acid metabolic process	1252	225	296.82	1
GO:0016070	RNA metabolic process	1087	181	257.7	1
GO:1901362	organic cyclic compound biosynthetic process	1099	171	260.55	1
GO:0018130	heterocycle biosynthetic process	1068	163	253.2	1
GO:0019438	aromatic compound biosynthetic process	1055	156	250.11	1
GO:0050794	regulation of cellular process	1249	190	296.11	1
GO:0050789	regulation of biological process	1278	194	302.98	1
GO:0006351	transcription, DNA-templated	865	100	205.07	1
GO:0006355	regulation of transcription, DNA-templated	767	73	181.84	1
GO:0008150	biological_process	8124	1926	1926	1
GO:0009889	regulation of biosynthetic process	778	78	184.44	1
GO:0010468	regulation of gene expression	786	81	186.34	1
GO:0010556	regulation of macromolecule biosynthetic process	778	78	184.44	1
GO:0019219	regulation of nucleobase-containing compound metabolic process	774	77	183.5	1
GO:0019222	regulation of metabolic process	816	90	193.45	1
GO:0031323	regulation of cellular metabolic process	800	86	189.66	1
GO:0031326	regulation of cellular biosynthetic process	778	78	184.44	1
GO:0032774	RNA biosynthetic process	865	100	205.07	1
GO:0034654	nucleobase-containing compound biosynthetic process	968	128	229.49	1
GO:0051171	regulation of nitrogen compound metabolic process	782	82	185.39	1
GO:0051252	regulation of RNA metabolic process	769	75	182.31	1
GO:0060255	regulation of macromolecule metabolic process	810	88	192.03	1
GO:0065007	biological regulation	1306	198	309.62	1
GO:0080090	regulation of primary metabolic process	799	85	189.42	1
GO:0097659	nucleic acid-templated transcription	865	100	205.07	1
GO:1903506	regulation of nucleic acid-templated transcription	767	73	181.84	1
GO:2000112	regulation of cellular macromolecule biosynthetic process	778	78	184.44	1
GO:2001141	regulation of RNA biosynthetic process	767	73	181.84	1
GO:0005992	trehalose biosynthetic process	21	0	4.98	1
GO:0006188	IMP biosynthetic process	10	0	2.37	1
GO:0006835	dicarboxylic acid transport	12	0	2.84	1
GO:0009628	response to abiotic stimulus	18	0	4.27	1
GO:0015740	C4-dicarboxylate transport	12	0	2.84	1
GO:0015743	malate transport	12	0	2.84	1
GO:0046040	IMP metabolic process	10	0	2.37	1

## Sheet: Distant eGenes GO enrichment
GO.ID	Term	Annotated	Significant	Expected	p.value
GO:0006468	protein phosphorylation	949	103	81.77	0.0064
GO:0016310	phosphorylation	1047	111	90.21	0.0096
GO:0008037	cell recognition	74	13	6.38	0.0099
GO:0009856	pollination	74	13	6.38	0.0099
GO:0009875	pollen-pistil interaction	74	13	6.38	0.0099
GO:0044706	multi-multicellular organism process	74	13	6.38	0.0099
GO:0048544	recognition of pollen	74	13	6.38	0.0099
GO:0016226	iron-sulfur cluster assembly	17	5	1.46	0.0121
GO:0031163	metallo-sulfur cluster assembly	17	5	1.46	0.0121
GO:0044267	cellular protein metabolic process	1730	173	149.06	0.0127
GO:0032501	multicellular organismal process	87	14	7.5	0.0161
GO:0044702	single organism reproductive process	79	13	6.81	0.0167
GO:0044703	multi-organism reproductive process	79	13	6.81	0.0167
GO:0006793	phosphorus metabolic process	1323	134	114	0.0198
GO:0051704	multi-organism process	82	13	7.07	0.0223
GO:0006464	cellular protein modification process	1207	122	104	0.0276
GO:0036211	protein modification process	1207	122	104	0.0276
GO:0006796	phosphate-containing compound metabolic process	1321	132	113.82	0.0307
GO:0000003	reproduction	86	13	7.41	0.0318
GO:0022414	reproductive process	86	13	7.41	0.0318
GO:0000375	RNA splicing, via transesterification reactions	15	4	1.29	0.0346
GO:0000377	RNA splicing, via transesterification reactions with bulged adenosine as nucleophile	15	4	1.29	0.0346
GO:0000398	mRNA splicing, via spliceosome	15	4	1.29	0.0346
GO:0008380	RNA splicing	22	5	1.9	0.0359
GO:0043412	macromolecule modification	1252	124	107.88	0.0453
GO:1902582	single-organism intracellular transport	75	11	6.46	0.0553
GO:0006505	GPI anchor metabolic process	12	3	1.03	0.0779
GO:0044765	single-organism transport	842	84	72.55	0.0797
GO:0009607	response to biotic stimulus	20	4	1.72	0.0875
GO:1902578	single-organism localization	860	85	74.1	0.0924
GO:0006694	steroid biosynthetic process	13	3	1.12	0.0951
GO:0006026	aminoglycan catabolic process	14	3	1.21	0.1136
GO:0006030	chitin metabolic process	14	3	1.21	0.1136
GO:0006032	chitin catabolic process	14	3	1.21	0.1136
GO:0007034	vacuolar transport	14	3	1.21	0.1136
GO:0046348	amino sugar catabolic process	14	3	1.21	0.1136
GO:1901071	glucosamine-containing compound metabolic process	14	3	1.21	0.1136
GO:1901072	glucosamine-containing compound catabolic process	14	3	1.21	0.1136
GO:0006664	glycolipid metabolic process	22	4	1.9	0.1155
GO:1903509	liposaccharide metabolic process	22	4	1.9	0.1155
GO:0007154	cell communication	427	44	36.79	0.1188
GO:0016071	mRNA metabolic process	49	7	4.22	0.125
GO:0006643	membrane lipid metabolic process	23	4	1.98	0.1308
GO:0009110	vitamin biosynthetic process	23	4	1.98	0.1308
GO:0032268	regulation of cellular protein metabolic process	23	4	1.98	0.1308
GO:0042364	water-soluble vitamin biosynthetic process	23	4	1.98	0.1308
GO:0048193	Golgi vesicle transport	23	4	1.98	0.1308
GO:0006040	amino sugar metabolic process	15	3	1.29	0.1333
GO:0008202	steroid metabolic process	15	3	1.29	0.1333
GO:0006766	vitamin metabolic process	24	4	2.07	0.1469
GO:0006767	water-soluble vitamin metabolic process	24	4	2.07	0.1469
GO:0006816	calcium ion transport	24	4	2.07	0.1469
GO:0006397	mRNA processing	42	6	3.62	0.1491
GO:0006412	translation	436	44	37.57	0.1492
GO:0008654	phospholipid biosynthetic process	33	5	2.84	0.1502
GO:0009247	glycolipid biosynthetic process	16	3	1.38	0.1541
GO:0046467	membrane lipid biosynthetic process	16	3	1.38	0.1541
GO:0006096	glycolytic process	52	7	4.48	0.1569
GO:0006757	ATP generation from ADP	52	7	4.48	0.1569
GO:0009135	purine nucleoside diphosphate metabolic process	52	7	4.48	0.1569
GO:0009179	purine ribonucleoside diphosphate metabolic process	52	7	4.48	0.1569
GO:0009185	ribonucleoside diphosphate metabolic process	52	7	4.48	0.1569
GO:0046031	ADP metabolic process	52	7	4.48	0.1569
GO:0051246	regulation of protein metabolic process	25	4	2.15	0.1637
GO:0043043	peptide biosynthetic process	441	44	38	0.168
GO:0006732	coenzyme metabolic process	133	15	11.46	0.1702
GO:0006022	aminoglycan metabolic process	17	3	1.46	0.1759
GO:0048519	negative regulation of biological process	35	5	3.02	0.1792
GO:0072528	pyrimidine-containing compound biosynthetic process	35	5	3.02	0.1792
GO:0022607	cellular component assembly	124	14	10.68	0.1795
GO:0019538	protein metabolic process	2030	185	174.91	0.1903
GO:0006090	pyruvate metabolic process	55	7	4.74	0.192
GO:0032787	monocarboxylic acid metabolic process	136	15	11.72	0.1923
GO:0016054	organic acid catabolic process	27	4	2.33	0.1993
GO:0046395	carboxylic acid catabolic process	27	4	2.33	0.1993
GO:0006952	defense response	46	6	3.96	0.2012
GO:0006206	pyrimidine nucleobase metabolic process	10	2	0.86	0.2109
GO:0006497	protein lipidation	10	2	0.86	0.2109
GO:0006506	GPI anchor biosynthetic process	10	2	0.86	0.2109
GO:0019856	pyrimidine nucleobase biosynthetic process	10	2	0.86	0.2109
GO:0042157	lipoprotein metabolic process	10	2	0.86	0.2109
GO:0042158	lipoprotein biosynthetic process	10	2	0.86	0.2109
GO:0055085	transmembrane transport	540	52	46.53	0.2129
GO:1901565	organonitrogen compound catabolic process	47	6	4.05	0.2152
GO:0051186	cofactor metabolic process	160	17	13.79	0.2154
GO:0044724	single-organism carbohydrate catabolic process	57	7	4.91	0.2171
GO:0009892	negative regulation of metabolic process	28	4	2.41	0.2178
GO:0010605	negative regulation of macromolecule metabolic process	28	4	2.41	0.2178
GO:0006518	peptide metabolic process	453	44	39.03	0.2181
GO:0032502	developmental process	19	3	1.64	0.2216
GO:0044767	single-organism developmental process	19	3	1.64	0.2216
GO:1901606	alpha-amino acid catabolic process	19	3	1.64	0.2216
GO:0043604	amide biosynthetic process	454	44	39.12	0.2226
GO:0072527	pyrimidine-containing compound metabolic process	38	5	3.27	0.2262
GO:0009966	regulation of signal transduction	48	6	4.14	0.2294
GO:0010646	regulation of cell communication	48	6	4.14	0.2294
GO:0023051	regulation of signaling	48	6	4.14	0.2294
GO:0006165	nucleoside diphosphate phosphorylation	59	7	5.08	0.2432
GO:0046939	nucleotide phosphorylation	59	7	5.08	0.2432
GO:0000105	histidine biosynthetic process	11	2	0.95	0.2439
GO:0006547	histidine metabolic process	11	2	0.95	0.2439
GO:0006661	phosphatidylinositol biosynthetic process	11	2	0.95	0.2439
GO:0016458	gene silencing	11	2	0.95	0.2439
GO:0031047	gene silencing by RNA	11	2	0.95	0.2439
GO:0052803	imidazole-containing compound metabolic process	11	2	0.95	0.2439
GO:0070838	divalent metal ion transport	40	5	3.45	0.2593
GO:0072511	divalent inorganic cation transport	40	5	3.45	0.2593
GO:0009063	cellular amino acid catabolic process	21	3	1.81	0.2693
GO:0072594	establishment of protein localization to organelle	21	3	1.81	0.2693
GO:0043603	cellular amide metabolic process	475	45	40.93	0.2693
GO:0009132	nucleoside diphosphate metabolic process	61	7	5.26	0.2703
GO:0006733	oxidoreduction coenzyme metabolic process	82	9	7.07	0.273
GO:1902580	single-organism cellular localization	31	4	2.67	0.2759
GO:0006612	protein targeting to membrane	12	2	1.03	0.2771
GO:0006613	cotranslational protein targeting to membrane	12	2	1.03	0.2771
GO:0006614	SRP-dependent cotranslational protein targeting to membrane	12	2	1.03	0.2771
GO:0006662	glycerol ether metabolic process	12	2	1.03	0.2771
GO:0018205	peptidyl-lysine modification	12	2	1.03	0.2771
GO:0018904	ether metabolic process	12	2	1.03	0.2771
GO:0045047	protein targeting to ER	12	2	1.03	0.2771
GO:0072599	establishment of protein localization to endoplasmic reticulum	12	2	1.03	0.2771
GO:0051726	regulation of cell cycle	22	3	1.9	0.2935
GO:0072350	tricarboxylic acid metabolic process	22	3	1.9	0.2935
GO:0072657	protein localization to membrane	22	3	1.9	0.2935
GO:0090150	establishment of protein localization to membrane	22	3	1.9	0.2935
GO:0090407	organophosphate biosynthetic process	127	13	10.94	0.2987
GO:0044712	single-organism catabolic process	128	13	11.03	0.3085
GO:0044282	small molecule catabolic process	33	4	2.84	0.3159
GO:0006414	translational elongation	23	3	1.98	0.3179
GO:0010629	negative regulation of gene expression	23	3	1.98	0.3179
GO:0015985	energy coupled proton transport, down electrochemical gradient	23	3	1.98	0.3179
GO:0015986	ATP synthesis coupled proton transport	23	3	1.98	0.3179
GO:0044802	single-organism membrane organization	23	3	1.98	0.3179
GO:0051128	regulation of cellular component organization	23	3	1.98	0.3179
GO:1901136	carbohydrate derivative catabolic process	23	3	1.98	0.3179
GO:0009141	nucleoside triphosphate metabolic process	108	11	9.31	0.3262
GO:0032259	methylation	44	5	3.79	0.3283
GO:0006399	tRNA metabolic process	76	8	6.55	0.3308
GO:0046034	ATP metabolic process	98	10	8.44	0.3358
GO:0006812	cation transport	275	26	23.7	0.3379
GO:0048523	negative regulation of cellular process	24	3	2.07	0.3424
GO:0006396	RNA processing	165	16	14.22	0.3476
GO:0016052	carbohydrate catabolic process	67	7	5.77	0.3553
GO:0006486	protein glycosylation	35	4	3.02	0.3563
GO:0043413	macromolecule glycosylation	35	4	3.02	0.3563
GO:0045454	cell redox homeostasis	89	9	7.67	0.3588
GO:0016043	cellular component organization	324	30	27.92	0.3659
GO:1901564	organonitrogen compound metabolic process	997	89	85.91	0.373
GO:0006418	tRNA aminoacylation for protein translation	36	4	3.1	0.3765
GO:0043038	amino acid activation	36	4	3.1	0.3765
GO:0043039	tRNA aminoacylation	36	4	3.1	0.3765
GO:0044723	single-organism carbohydrate metabolic process	247	23	21.28	0.3792
GO:0006818	hydrogen transport	47	5	4.05	0.3812
GO:0006855	drug transmembrane transport	47	5	4.05	0.3812
GO:0015893	drug transport	47	5	4.05	0.3812
GO:0015992	proton transport	47	5	4.05	0.3812
GO:0042493	response to drug	47	5	4.05	0.3812
GO:1901566	organonitrogen compound biosynthetic process	736	66	63.42	0.3817
GO:0044085	cellular component biogenesis	180	17	15.51	0.3825
GO:0000160	phosphorelay signal transduction system	58	6	5	0.3834
GO:0006644	phospholipid metabolic process	80	8	6.89	0.3844
GO:0019362	pyridine nucleotide metabolic process	80	8	6.89	0.3844
GO:0046496	nicotinamide nucleotide metabolic process	80	8	6.89	0.3844
GO:0051234	establishment of localization	1218	108	104.95	0.385
GO:0006605	protein targeting	26	3	2.24	0.3909
GO:0009161	ribonucleoside monophosphate metabolic process	114	11	9.82	0.3934
GO:0006810	transport	1209	107	104.17	0.3941
GO:0006811	ion transport	374	34	32.23	0.3964
GO:0018193	peptidyl-amino acid modification	48	5	4.14	0.3988
GO:0048583	regulation of response to stimulus	59	6	5.08	0.3993
GO:1901137	carbohydrate derivative biosynthetic process	126	12	10.86	0.4025
GO:1901575	organic substance catabolic process	273	25	23.52	0.4047
GO:0000278	mitotic cell cycle	16	2	1.38	0.4067
GO:0034655	nucleobase-containing compound catabolic process	16	2	1.38	0.4067
GO:0046112	nucleobase biosynthetic process	16	2	1.38	0.4067
GO:1903047	mitotic cell cycle process	16	2	1.38	0.4067
GO:0044260	cellular macromolecule metabolic process	3014	263	259.7	0.4083
GO:1901135	carbohydrate derivative metabolic process	274	25	23.61	0.4121
GO:0033014	tetrapyrrole biosynthetic process	27	3	2.33	0.4149
GO:0033365	protein localization to organelle	27	3	2.33	0.4149
GO:0009123	nucleoside monophosphate metabolic process	116	11	10	0.4161
GO:0009100	glycoprotein metabolic process	38	4	3.27	0.4167
GO:0009101	glycoprotein biosynthetic process	38	4	3.27	0.4167
GO:0044699	single-organism process	3608	314	310.88	0.417
GO:0051179	localization	1227	108	105.72	0.4183
GO:0009144	purine nucleoside triphosphate metabolic process	105	10	9.05	0.419
GO:0009199	ribonucleoside triphosphate metabolic process	105	10	9.05	0.419
GO:0009205	purine ribonucleoside triphosphate metabolic process	105	10	9.05	0.419
GO:0009056	catabolic process	275	25	23.7	0.4195
GO:0006284	base-excision repair	17	2	1.46	0.4375
GO:0006544	glycine metabolic process	17	2	1.46	0.4375
GO:0009112	nucleobase metabolic process	17	2	1.46	0.4375
GO:0016042	lipid catabolic process	17	2	1.46	0.4375
GO:0031324	negative regulation of cellular metabolic process	17	2	1.46	0.4375
GO:0046474	glycerophospholipid biosynthetic process	17	2	1.46	0.4375
GO:0070588	calcium ion transmembrane transport	17	2	1.46	0.4375
GO:0070972	protein localization to endoplasmic reticulum	17	2	1.46	0.4375
GO:0072524	pyridine-containing compound metabolic process	84	8	7.24	0.4383
GO:0006366	transcription from RNA polymerase II promoter	28	3	2.41	0.4385
GO:0006413	translational initiation	28	3	2.41	0.4385
GO:0051188	cofactor biosynthetic process	73	7	6.29	0.4424
GO:0009108	coenzyme biosynthetic process	51	5	4.39	0.4513
GO:0016051	carbohydrate biosynthetic process	85	8	7.32	0.4517
GO:0008033	tRNA processing	40	4	3.45	0.4563
GO:1902600	hydrogen ion transmembrane transport	40	4	3.45	0.4563
GO:0019725	cellular homeostasis	97	9	8.36	0.4597
GO:0006334	nucleosome assembly	29	3	2.5	0.4618
GO:0031497	chromatin assembly	29	3	2.5	0.4618
GO:0034728	nucleosome organization	29	3	2.5	0.4618
GO:0051276	chromosome organization	86	8	7.41	0.4651
GO:0009126	purine nucleoside monophosphate metabolic process	109	10	9.39	0.4666
GO:0009167	purine ribonucleoside monophosphate metabolic process	109	10	9.39	0.4666
GO:0009259	ribonucleotide metabolic process	132	12	11.37	0.4675
GO:0006996	organelle organization	155	14	13.36	0.468
GO:0044763	single-organism cellular process	2352	204	202.66	0.4688
GO:0030001	metal ion transport	190	17	16.37	0.4728
GO:0009119	ribonucleoside metabolic process	133	12	11.46	0.4783
GO:0034622	cellular macromolecular complex assembly	87	8	7.5	0.4784
GO:0061024	membrane organization	30	3	2.58	0.4847
GO:0008152	metabolic process	6141	530	529.14	0.4892
GO:0009072	aromatic amino acid family metabolic process	42	4	3.62	0.495
GO:0009309	amine biosynthetic process	19	2	1.64	0.4963
GO:0016569	covalent chromatin modification	19	2	1.64	0.4963
GO:0016570	histone modification	19	2	1.64	0.4963
GO:0042401	cellular biogenic amine biosynthetic process	19	2	1.64	0.4963
GO:0048285	organelle fission	19	2	1.64	0.4963
GO:0051301	cell division	19	2	1.64	0.4963
GO:0000271	polysaccharide biosynthetic process	54	5	4.65	0.5025
GO:0006325	chromatin organization	54	5	4.65	0.5025
GO:0009250	glucan biosynthetic process	54	5	4.65	0.5025
GO:0033692	cellular polysaccharide biosynthetic process	54	5	4.65	0.5025
GO:0006323	DNA packaging	31	3	2.67	0.507
GO:0006333	chromatin assembly or disassembly	31	3	2.67	0.507
GO:0006754	ATP biosynthetic process	31	3	2.67	0.507
GO:0065004	protein-DNA complex assembly	31	3	2.67	0.507
GO:0071824	protein-DNA complex subunit organization	31	3	2.67	0.507
GO:0071840	cellular component organization or biogenesis	380	33	32.74	0.5087
GO:0006082	organic acid metabolic process	427	37	36.79	0.5119
GO:0070085	glycosylation	43	4	3.71	0.5139
GO:0071103	DNA conformation change	43	4	3.71	0.5139
GO:0044248	cellular catabolic process	183	16	15.77	0.5144
GO:0019637	organophosphate metabolic process	288	25	24.82	0.5159
GO:0009163	nucleoside biosynthetic process	55	5	4.74	0.5191
GO:0042254	ribosome biogenesis	55	5	4.74	0.5191
GO:0042455	ribonucleoside biosynthetic process	55	5	4.74	0.5191
GO:1901659	glycosyl compound biosynthetic process	55	5	4.74	0.5191
GO:0034660	ncRNA metabolic process	102	9	8.79	0.5216
GO:0003333	amino acid transmembrane transport	20	2	1.72	0.5242
GO:0006479	protein methylation	20	2	1.72	0.5242
GO:0006865	amino acid transport	20	2	1.72	0.5242
GO:0008213	protein alkylation	20	2	1.72	0.5242
GO:0098656	anion transmembrane transport	20	2	1.72	0.5242
GO:1903825	organic acid transmembrane transport	20	2	1.72	0.5242
GO:0042278	purine nucleoside metabolic process	126	11	10.86	0.5283
GO:0046128	purine ribonucleoside metabolic process	126	11	10.86	0.5283
GO:0033013	tetrapyrrole metabolic process	32	3	2.76	0.5289
GO:0009057	macromolecule catabolic process	138	12	11.89	0.5313
GO:0007165	signal transduction	349	30	30.07	0.5346
GO:0023052	signaling	349	30	30.07	0.5346
GO:0044700	single organism signaling	349	30	30.07	0.5346
GO:0009260	ribonucleotide biosynthetic process	56	5	4.83	0.5356
GO:0046390	ribose phosphate biosynthetic process	56	5	4.83	0.5356
GO:0034637	cellular carbohydrate biosynthetic process	80	7	6.89	0.541
GO:0019693	ribose phosphate metabolic process	151	13	13.01	0.5441
GO:0019752	carboxylic acid metabolic process	421	36	36.28	0.5464
GO:0006779	porphyrin-containing compound biosynthetic process	21	2	1.81	0.5511
GO:0042592	homeostatic process	105	9	9.05	0.5576
GO:0009150	purine ribonucleotide metabolic process	129	11	11.12	0.5608
GO:0009308	amine metabolic process	58	5	5	0.5676
GO:0043436	oxoacid metabolic process	426	36	36.71	0.5764
GO:0006221	pyrimidine nucleotide biosynthetic process	22	2	1.9	0.5768
GO:0015988	energy coupled proton transmembrane transport, against electrochemical gradient	22	2	1.9	0.5768
GO:0015991	ATP hydrolysis coupled proton transport	22	2	1.9	0.5768
GO:0090662	ATP hydrolysis coupled transmembrane transport	22	2	1.9	0.5768
GO:0065003	macromolecular complex assembly	95	8	8.19	0.5809
GO:0006457	protein folding	143	12	12.32	0.5826
GO:0022613	ribonucleoprotein complex biogenesis	59	5	5.08	0.5832
GO:0009156	ribonucleoside monophosphate biosynthetic process	47	4	4.05	0.5859
GO:0015849	organic acid transport	35	3	3.02	0.591
GO:0046942	carboxylic acid transport	35	3	3.02	0.591
GO:0006298	mismatch repair	10	1	0.86	0.5941
GO:0006415	translational termination	10	1	0.86	0.5941
GO:0006904	vesicle docking involved in exocytosis	10	1	0.86	0.5941
GO:0007005	mitochondrion organization	10	1	0.86	0.5941
GO:0007067	mitotic nuclear division	10	1	0.86	0.5941
GO:0009218	pyrimidine ribonucleotide metabolic process	10	1	0.86	0.5941
GO:0009220	pyrimidine ribonucleotide biosynthetic process	10	1	0.86	0.5941
GO:0015936	coenzyme A metabolic process	10	1	0.86	0.5941
GO:0019751	polyol metabolic process	10	1	0.86	0.5941
GO:0022406	membrane docking	10	1	0.86	0.5941
GO:0044087	regulation of cellular component biogenesis	10	1	0.86	0.5941
GO:0044242	cellular lipid catabolic process	10	1	0.86	0.5941
GO:0046132	pyrimidine ribonucleoside biosynthetic process	10	1	0.86	0.5941
GO:0046134	pyrimidine nucleoside biosynthetic process	10	1	0.86	0.5941
GO:0048278	vesicle docking	10	1	0.86	0.5941
GO:1901617	organic hydroxy compound biosynthetic process	10	1	0.86	0.5941
GO:1901700	response to oxygen-containing compound	10	1	0.86	0.5941
GO:0006220	pyrimidine nucleotide metabolic process	23	2	1.98	0.6015
GO:0006887	exocytosis	23	2	1.98	0.6015
GO:0016568	chromatin modification	23	2	1.98	0.6015
GO:0043933	macromolecular complex subunit organization	133	11	11.46	0.6026
GO:0015711	organic anion transport	48	4	4.14	0.6029
GO:0051716	cellular response to stimulus	443	37	38.17	0.6068
GO:0006511	ubiquitin-dependent protein catabolic process	73	6	6.29	0.6095
GO:0006979	response to oxidative stress	73	6	6.29	0.6095
GO:0019941	modification-dependent protein catabolic process	73	6	6.29	0.6095
GO:0043632	modification-dependent macromolecule catabolic process	73	6	6.29	0.6095
GO:0043414	macromolecule methylation	36	3	3.1	0.6105
GO:0043648	dicarboxylic acid metabolic process	36	3	3.1	0.6105
GO:0035556	intracellular signal transduction	170	14	14.65	0.6116
GO:0009124	nucleoside monophosphate biosynthetic process	49	4	4.22	0.6195
GO:0046907	intracellular transport	219	18	18.87	0.62
GO:0051649	establishment of localization in cell	243	20	20.94	0.6204
GO:0006163	purine nucleotide metabolic process	135	11	11.63	0.6228
GO:0006091	generation of precursor metabolites and energy	123	10	10.6	0.6242
GO:0034220	ion transmembrane transport	123	10	10.6	0.6242
GO:0032940	secretion by cell	24	2	2.07	0.625
GO:0046903	secretion	24	2	2.07	0.625
GO:0006074	(1->3)-beta-D-glucan metabolic process	11	1	0.95	0.6291
GO:0006075	(1->3)-beta-D-glucan biosynthetic process	11	1	0.95	0.6291
GO:0006771	riboflavin metabolic process	11	1	0.95	0.6291
GO:0009231	riboflavin biosynthetic process	11	1	0.95	0.6291
GO:0010035	response to inorganic substance	11	1	0.95	0.6291
GO:0017038	protein import	11	1	0.95	0.6291
GO:0042726	flavin-containing compound metabolic process	11	1	0.95	0.6291
GO:0042727	flavin-containing compound biosynthetic process	11	1	0.95	0.6291
GO:0022402	cell cycle process	37	3	3.19	0.6294
GO:0042221	response to chemical	87	7	7.5	0.6317
GO:0042451	purine nucleoside biosynthetic process	50	4	4.31	0.6356
GO:0046129	purine ribonucleoside biosynthetic process	50	4	4.31	0.6356
GO:0005975	carbohydrate metabolic process	603	50	51.96	0.6388
GO:0009116	nucleoside metabolic process	149	12	12.84	0.6407
GO:1901657	glycosyl compound metabolic process	149	12	12.84	0.6407
GO:0006753	nucleoside phosphate metabolic process	186	15	16.03	0.6457
GO:0009073	aromatic amino acid family biosynthetic process	25	2	2.15	0.6475
GO:0045017	glycerolipid biosynthetic process	25	2	2.15	0.6475
GO:0009142	nucleoside triphosphate biosynthetic process	38	3	3.27	0.6476
GO:0009145	purine nucleoside triphosphate biosynthetic process	38	3	3.27	0.6476
GO:0009201	ribonucleoside triphosphate biosynthetic process	38	3	3.27	0.6476
GO:0009206	purine ribonucleoside triphosphate biosynthetic process	38	3	3.27	0.6476
GO:0008610	lipid biosynthetic process	162	13	13.96	0.6482
GO:0016192	vesicle-mediated transport	126	10	10.86	0.6547
GO:0009987	cellular process	5411	462	466.24	0.6555
GO:0006281	DNA repair	89	7	7.67	0.6557
GO:0006213	pyrimidine nucleoside metabolic process	12	1	1.03	0.6611
GO:0006265	DNA topological change	12	1	1.03	0.6611
GO:0006525	arginine metabolic process	12	1	1.03	0.6611
GO:0006760	folic acid-containing compound metabolic process	12	1	1.03	0.6611
GO:0006839	mitochondrial transport	12	1	1.03	0.6611
GO:0033043	regulation of organelle organization	12	1	1.03	0.6611
GO:0046131	pyrimidine ribonucleoside metabolic process	12	1	1.03	0.6611
GO:0006073	cellular glucan metabolic process	77	6	6.63	0.6617
GO:0044042	glucan metabolic process	77	6	6.63	0.6617
GO:0044264	cellular polysaccharide metabolic process	77	6	6.63	0.6617
GO:0030163	protein catabolic process	102	8	8.79	0.6621
GO:0044265	cellular macromolecule catabolic process	102	8	8.79	0.6621
GO:0051641	cellular localization	261	21	22.49	0.6636
GO:0006820	anion transport	90	7	7.75	0.6673
GO:0006974	cellular response to DNA damage stimulus	90	7	7.75	0.6673
GO:0044257	cellular protein catabolic process	90	7	7.75	0.6673
GO:0051603	proteolysis involved in cellular protein catabolic process	90	7	7.75	0.6673
GO:0006778	porphyrin-containing compound metabolic process	26	2	2.24	0.6689
GO:0009312	oligosaccharide biosynthetic process	26	2	2.24	0.6689
GO:0044270	cellular nitrogen compound catabolic process	26	2	2.24	0.6689
GO:0046700	heterocycle catabolic process	26	2	2.24	0.6689
GO:0098655	cation transmembrane transport	103	8	8.87	0.6729
GO:0098660	inorganic ion transmembrane transport	103	8	8.87	0.6729
GO:0098662	inorganic cation transmembrane transport	103	8	8.87	0.6729
GO:0065008	regulation of biological quality	128	10	11.03	0.6743
GO:0009152	purine ribonucleotide biosynthetic process	53	4	4.57	0.6813
GO:0051273	beta-glucan metabolic process	40	3	3.45	0.6821
GO:0051274	beta-glucan biosynthetic process	40	3	3.45	0.6821
GO:0034470	ncRNA processing	66	5	5.69	0.6831
GO:0051258	protein polymerization	27	2	2.33	0.6892
GO:0033554	cellular response to stress	92	7	7.93	0.6898
GO:0000910	cytokinesis	13	1	1.12	0.6903
GO:0006857	oligopeptide transport	13	1	1.12	0.6903
GO:0007275	multicellular organism development	13	1	1.12	0.6903
GO:0009890	negative regulation of biosynthetic process	13	1	1.12	0.6903
GO:0010558	negative regulation of macromolecule biosynthetic process	13	1	1.12	0.6903
GO:0015833	peptide transport	13	1	1.12	0.6903
GO:0015914	phospholipid transport	13	1	1.12	0.6903
GO:0031327	negative regulation of cellular biosynthetic process	13	1	1.12	0.6903
GO:0033865	nucleoside bisphosphate metabolic process	13	1	1.12	0.6903
GO:0033875	ribonucleoside bisphosphate metabolic process	13	1	1.12	0.6903
GO:0034032	purine nucleoside bisphosphate metabolic process	13	1	1.12	0.6903
GO:0042886	amide transport	13	1	1.12	0.6903
GO:0044707	single-multicellular organism process	13	1	1.12	0.6903
GO:0051338	regulation of transferase activity	13	1	1.12	0.6903
GO:2000113	negative regulation of cellular macromolecule biosynthetic process	13	1	1.12	0.6903
GO:0071702	organic substance transport	314	25	27.06	0.6932
GO:0015979	photosynthesis	80	6	6.89	0.6979
GO:0006259	DNA metabolic process	168	13	14.48	0.6993
GO:0007049	cell cycle	55	4	4.74	0.7095
GO:0009117	nucleotide metabolic process	182	14	15.68	0.7119
GO:0009127	purine nucleoside monophosphate biosynthetic process	42	3	3.62	0.7141
GO:0009168	purine ribonucleoside monophosphate biosynthetic process	42	3	3.62	0.7141
GO:0000280	nuclear division	14	1	1.21	0.7171
GO:0042558	pteridine-containing compound metabolic process	14	1	1.21	0.7171
GO:0043624	cellular protein complex disassembly	14	1	1.21	0.7171
GO:0051172	negative regulation of nitrogen compound metabolic process	14	1	1.21	0.7171
GO:0045184	establishment of protein localization	220	17	18.96	0.7182
GO:0030243	cellulose metabolic process	29	2	2.5	0.7268
GO:0030244	cellulose biosynthetic process	29	2	2.5	0.7268
GO:0006869	lipid transport	43	3	3.71	0.7291
GO:0010876	lipid localization	43	3	3.71	0.7291
GO:0006164	purine nucleotide biosynthetic process	57	4	4.91	0.7358
GO:0006108	malate metabolic process	15	1	1.29	0.7415
GO:0022411	cellular component disassembly	15	1	1.29	0.7415
GO:0031399	regulation of protein modification process	15	1	1.29	0.7415
GO:0032984	macromolecular complex disassembly	15	1	1.29	0.7415
GO:0043241	protein complex disassembly	15	1	1.29	0.7415
GO:0015031	protein transport	211	16	18.18	0.7415
GO:0009165	nucleotide biosynthetic process	84	6	7.24	0.742
GO:1901293	nucleoside phosphate biosynthetic process	84	6	7.24	0.742
GO:0072521	purine-containing compound metabolic process	149	11	12.84	0.7479
GO:0046488	phosphatidylinositol metabolic process	45	3	3.88	0.7573
GO:0007010	cytoskeleton organization	31	2	2.67	0.7604
GO:0071822	protein complex subunit organization	99	7	8.53	0.7607
GO:0006461	protein complex assembly	86	6	7.41	0.7622
GO:0070271	protein complex biogenesis	86	6	7.41	0.7622
GO:0006400	tRNA modification	16	1	1.38	0.7638
GO:0015748	organophosphate ester transport	16	1	1.38	0.7638
GO:0044711	single-organism biosynthetic process	523	41	45.06	0.7662
GO:0044262	cellular carbohydrate metabolic process	126	9	10.86	0.769
GO:0008104	protein localization	228	17	19.65	0.7702
GO:0044281	small molecule metabolic process	706	56	60.83	0.7708
GO:0006650	glycerophospholipid metabolic process	60	4	5.17	0.7718
GO:0005976	polysaccharide metabolic process	87	6	7.5	0.7719
GO:0006913	nucleocytoplasmic transport	47	3	4.05	0.783
GO:0051169	nuclear transport	47	3	4.05	0.783
GO:0006099	tricarboxylic acid cycle	17	1	1.46	0.7842
GO:0006101	citrate metabolic process	17	1	1.46	0.7842
GO:0006310	DNA recombination	17	1	1.46	0.7842
GO:0050790	regulation of catalytic activity	17	1	1.46	0.7842
GO:0015672	monovalent inorganic cation transport	102	7	8.79	0.7872
GO:0006520	cellular amino acid metabolic process	244	18	21.02	0.79
GO:0000413	protein peptidyl-prolyl isomerization	33	2	2.84	0.7904
GO:0006081	cellular aldehyde metabolic process	33	2	2.84	0.7904
GO:0018208	peptidyl-proline modification	33	2	2.84	0.7904
GO:0044272	sulfur compound biosynthetic process	48	3	4.14	0.795
GO:0055086	nucleobase-containing small molecule metabolic process	220	16	18.96	0.7976
GO:0007264	small GTPase mediated signal transduction	90	6	7.75	0.7991
GO:0009060	aerobic respiration	18	1	1.55	0.8028
GO:0009628	response to abiotic stimulus	18	1	1.55	0.8028
GO:0009891	positive regulation of biosynthetic process	18	1	1.55	0.8028
GO:0010557	positive regulation of macromolecule biosynthetic process	18	1	1.55	0.8028
GO:0010604	positive regulation of macromolecule metabolic process	18	1	1.55	0.8028
GO:0010628	positive regulation of gene expression	18	1	1.55	0.8028
GO:0031325	positive regulation of cellular metabolic process	18	1	1.55	0.8028
GO:0031328	positive regulation of cellular biosynthetic process	18	1	1.55	0.8028
GO:0051173	positive regulation of nitrogen compound metabolic process	18	1	1.55	0.8028
GO:0065009	regulation of molecular function	18	1	1.55	0.8028
GO:0006352	DNA-templated transcription, initiation	34	2	2.93	0.8041
GO:0009064	glutamine family amino acid metabolic process	34	2	2.93	0.8041
GO:0033036	macromolecule localization	272	20	23.44	0.8047
GO:0043623	cellular protein complex assembly	49	3	4.22	0.8065
GO:0043170	macromolecule metabolic process	3338	277	287.62	0.8141
GO:0050896	response to stimulus	719	56	61.95	0.8147
GO:0009069	serine family amino acid metabolic process	35	2	3.02	0.817
GO:0006098	pentose-phosphate shunt	19	1	1.64	0.8199
GO:0006721	terpenoid metabolic process	19	1	1.64	0.8199
GO:0009893	positive regulation of metabolic process	19	1	1.64	0.8199
GO:0016114	terpenoid biosynthetic process	19	1	1.64	0.8199
GO:0051156	glucose 6-phosphate metabolic process	19	1	1.64	0.8199
GO:0071554	cell wall organization or biogenesis	79	5	6.81	0.8224
GO:0006790	sulfur compound metabolic process	65	4	5.6	0.8231
GO:0071705	nitrogen compound transport	51	3	4.39	0.8277
GO:0016482	cytoplasmic transport	80	5	6.89	0.8307
GO:1901605	alpha-amino acid metabolic process	148	10	12.75	0.8315
GO:0000041	transition metal ion transport	20	1	1.72	0.8354
GO:0006006	glucose metabolic process	20	1	1.72	0.8354
GO:0006357	regulation of transcription from RNA polymerase II promoter	20	1	1.72	0.8354
GO:0005996	monosaccharide metabolic process	52	3	4.48	0.8376
GO:0072330	monocarboxylic acid biosynthetic process	67	4	5.77	0.8408
GO:0044710	single-organism metabolic process	2076	168	178.88	0.8489
GO:0046486	glycerolipid metabolic process	68	4	5.86	0.849
GO:0006629	lipid metabolic process	358	26	30.85	0.8491
GO:0005992	trehalose biosynthetic process	21	1	1.81	0.8496
GO:0019682	glyceraldehyde-3-phosphate metabolic process	21	1	1.81	0.8496
GO:0006576	cellular biogenic amine metabolic process	38	2	3.27	0.8513
GO:0022900	electron transport chain	38	2	3.27	0.8513
GO:0044106	cellular amine metabolic process	38	2	3.27	0.8513
GO:0044237	cellular metabolic process	4024	334	346.73	0.8522
GO:0006470	protein dephosphorylation	54	3	4.65	0.8559
GO:0009311	oligosaccharide metabolic process	39	2	3.36	0.8614
GO:0006739	NADP metabolic process	22	1	1.9	0.8626
GO:0009084	glutamine family amino acid biosynthetic process	22	1	1.9	0.8626
GO:0072522	purine-containing compound biosynthetic process	70	4	6.03	0.8645
GO:0044283	small molecule biosynthetic process	221	15	19.04	0.8672
GO:0006720	isoprenoid metabolic process	40	2	3.45	0.8708
GO:0006813	potassium ion transport	40	2	3.45	0.8708
GO:0008299	isoprenoid biosynthetic process	40	2	3.45	0.8708
GO:0007017	microtubule-based process	114	7	9.82	0.8715
GO:0006631	fatty acid metabolic process	71	4	6.12	0.8717
GO:0044255	cellular lipid metabolic process	209	14	18.01	0.8724
GO:0005991	trehalose metabolic process	23	1	1.98	0.8745
GO:0007186	G-protein coupled receptor signaling pathway	23	1	1.98	0.8745
GO:0048522	positive regulation of cellular process	23	1	1.98	0.8745
GO:0055114	oxidation-reduction process	1060	82	91.33	0.8767
GO:0007018	microtubule-based movement	72	4	6.2	0.8786
GO:0019439	aromatic compound catabolic process	57	3	4.91	0.8799
GO:1901361	organic cyclic compound catabolic process	57	3	4.91	0.8799
GO:0006950	response to stress	290	20	24.99	0.8814
GO:0006066	alcohol metabolic process	24	1	2.07	0.8853
GO:0006563	L-serine metabolic process	24	1	2.07	0.8853
GO:0046351	disaccharide biosynthetic process	24	1	2.07	0.8853
GO:0048518	positive regulation of biological process	24	1	2.07	0.8853
GO:0071804	cellular potassium ion transport	24	1	2.07	0.8853
GO:0071805	potassium ion transmembrane transport	24	1	2.07	0.8853
GO:0006928	movement of cell or subcellular component	75	4	6.46	0.8973
GO:0009058	biosynthetic process	2062	164	177.67	0.9018
GO:0010467	gene expression	1488	116	128.21	0.9042
GO:0009664	plant-type cell wall organization	26	1	2.24	0.9043
GO:0071669	plant-type cell wall organization or biogenesis	26	1	2.24	0.9043
GO:0009719	response to endogenous stimulus	29	1	2.5	0.927
GO:0009725	response to hormone	29	1	2.5	0.927
GO:0010033	response to organic substance	29	1	2.5	0.927
GO:1902589	single-organism organelle organization	65	3	5.6	0.9275
GO:0006260	DNA replication	49	2	4.22	0.9326
GO:0006364	rRNA processing	30	1	2.58	0.9333
GO:0016072	rRNA metabolic process	30	1	2.58	0.9333
GO:1901615	organic hydroxy compound metabolic process	30	1	2.58	0.9333
GO:0034645	cellular macromolecule biosynthetic process	1453	111	125.2	0.9369
GO:0009059	macromolecule biosynthetic process	1454	111	125.28	0.938
GO:0015698	inorganic anion transport	31	1	2.67	0.9391
GO:0046148	pigment biosynthetic process	31	1	2.67	0.9391
GO:0006886	intracellular protein transport	174	10	14.99	0.9403
GO:0034613	cellular protein localization	191	11	16.46	0.9469
GO:0070727	cellular macromolecule localization	191	11	16.46	0.9469
GO:0034641	cellular nitrogen compound metabolic process	2044	159	176.12	0.947
GO:0006575	cellular modified amino acid metabolic process	33	1	2.84	0.9492
GO:0030258	lipid modification	33	1	2.84	0.9492
GO:0006807	nitrogen compound metabolic process	2257	176	194.47	0.954
GO:0044271	cellular nitrogen compound biosynthetic process	1500	113	129.25	0.9577
GO:0016311	dephosphorylation	74	3	6.38	0.96
GO:0005984	disaccharide metabolic process	36	1	3.1	0.9613
GO:0042440	pigment metabolic process	36	1	3.1	0.9613
GO:0045333	cellular respiration	36	1	3.1	0.9613
GO:1901360	organic cyclic compound metabolic process	1676	127	144.41	0.9614
GO:0042545	cell wall modification	39	1	3.36	0.9705
GO:0046483	heterocycle metabolic process	1612	120	138.9	0.9742
GO:0071704	organic substance metabolic process	4700	381	404.97	0.9747
GO:0006633	fatty acid biosynthetic process	62	2	5.34	0.9747
GO:1901576	organic substance biosynthetic process	1943	147	167.42	0.9749
GO:1901607	alpha-amino acid biosynthetic process	100	4	8.62	0.9774
GO:0009451	RNA modification	42	1	3.62	0.9775
GO:1901362	organic cyclic compound biosynthetic process	1099	78	94.69	0.9786
GO:0019318	hexose metabolic process	43	1	3.71	0.9795
GO:0045229	external encapsulating structure organization	65	2	5.6	0.9799
GO:0071555	cell wall organization	65	2	5.6	0.9799
GO:0015980	energy derivation by oxidation of organic compounds	44	1	3.79	0.9812
GO:0044249	cellular biosynthetic process	1922	144	165.61	0.9813
GO:0008652	cellular amino acid biosynthetic process	120	5	10.34	0.9813
GO:0016053	organic acid biosynthetic process	187	9	16.11	0.9841
GO:0046394	carboxylic acid biosynthetic process	187	9	16.11	0.9841
GO:0044238	primary metabolic process	4509	360	388.52	0.9894
GO:0006725	cellular aromatic compound metabolic process	1644	119	141.65	0.9897
GO:0018130	heterocycle biosynthetic process	1068	73	92.02	0.9904
GO:0006139	nucleobase-containing compound metabolic process	1499	107	129.16	0.9907
GO:0090304	nucleic acid metabolic process	1252	87	107.88	0.9916
GO:0016070	RNA metabolic process	1087	74	93.66	0.9918
GO:0016567	protein ubiquitination	77	2	6.63	0.9922
GO:0032446	protein modification by small protein conjugation	79	2	6.81	0.9933
GO:0050794	regulation of cellular process	1249	86	107.62	0.9935
GO:0070647	protein modification by small protein conjugation or removal	80	2	6.89	0.9938
GO:0050789	regulation of biological process	1278	88	110.12	0.994
GO:0019438	aromatic compound biosynthetic process	1055	69	90.9	0.9967
GO:0065007	biological regulation	1306	88	112.53	0.9972
GO:0006351	transcription, DNA-templated	865	54	74.53	0.9974
GO:0032774	RNA biosynthetic process	865	54	74.53	0.9974
GO:0097659	nucleic acid-templated transcription	865	54	74.53	0.9974
GO:0010468	regulation of gene expression	786	47	67.73	0.9985
GO:0006508	proteolysis	374	18	32.23	0.9986
GO:0034654	nucleobase-containing compound biosynthetic process	968	60	83.41	0.9988
GO:0060255	regulation of macromolecule metabolic process	810	48	69.79	0.9989
GO:0019222	regulation of metabolic process	816	48	70.31	0.9991
GO:0009889	regulation of biosynthetic process	778	45	67.04	0.9992
GO:0010556	regulation of macromolecule biosynthetic process	778	45	67.04	0.9992
GO:0031326	regulation of cellular biosynthetic process	778	45	67.04	0.9992
GO:2000112	regulation of cellular macromolecule biosynthetic process	778	45	67.04	0.9992
GO:0051171	regulation of nitrogen compound metabolic process	782	45	67.38	0.9994
GO:0080090	regulation of primary metabolic process	799	46	68.85	0.9994
GO:0031323	regulation of cellular metabolic process	800	46	68.93	0.9994
GO:0006355	regulation of transcription, DNA-templated	767	42	66.09	0.9998
GO:1903506	regulation of nucleic acid-templated transcription	767	42	66.09	0.9998
GO:2001141	regulation of RNA biosynthetic process	767	42	66.09	0.9998
GO:0051252	regulation of RNA metabolic process	769	42	66.26	0.9998
GO:0019219	regulation of nucleobase-containing compound metabolic process	774	42	66.69	0.9998
GO:0008150	biological_process	8124	700	700	1
GO:0000079	regulation of cyclin-dependent protein serine/threonine kinase activity	10	0	0.86	1
GO:0000096	sulfur amino acid metabolic process	25	0	2.15	1
GO:0000097	sulfur amino acid biosynthetic process	22	0	1.9	1
GO:0000226	microtubule cytoskeleton organization	14	0	1.21	1
GO:0000272	polysaccharide catabolic process	10	0	0.86	1
GO:0001510	RNA methylation	11	0	0.95	1
GO:0001522	pseudouridine synthesis	15	0	1.29	1
GO:0001932	regulation of protein phosphorylation	11	0	0.95	1
GO:0005985	sucrose metabolic process	13	0	1.12	1
GO:0006119	oxidative phosphorylation	14	0	1.21	1
GO:0006188	IMP biosynthetic process	10	0	0.86	1
GO:0006534	cysteine metabolic process	11	0	0.95	1
GO:0006535	cysteine biosynthetic process from serine	10	0	0.86	1
GO:0006541	glutamine metabolic process	12	0	1.03	1
GO:0006555	methionine metabolic process	13	0	1.12	1
GO:0006568	tryptophan metabolic process	14	0	1.21	1
GO:0006586	indolalkylamine metabolic process	14	0	1.21	1
GO:0006595	polyamine metabolic process	12	0	1.03	1
GO:0006596	polyamine biosynthetic process	10	0	0.86	1
GO:0006801	superoxide metabolic process	15	0	1.29	1
GO:0006835	dicarboxylic acid transport	12	0	1.03	1
GO:0006888	ER to Golgi vesicle-mediated transport	11	0	0.95	1
GO:0008272	sulfate transport	15	0	1.29	1
GO:0009066	aspartate family amino acid metabolic process	28	0	2.41	1
GO:0009067	aspartate family amino acid biosynthetic process	24	0	2.07	1
GO:0009070	serine family amino acid biosynthetic process	20	0	1.72	1
GO:0009086	methionine biosynthetic process	11	0	0.95	1
GO:0009698	phenylpropanoid metabolic process	26	0	2.24	1
GO:0009808	lignin metabolic process	26	0	2.24	1
GO:0015740	C4-dicarboxylate transport	12	0	1.03	1
GO:0015743	malate transport	12	0	1.03	1
GO:0015994	chlorophyll metabolic process	14	0	1.21	1
GO:0015995	chlorophyll biosynthetic process	12	0	1.03	1
GO:0016485	protein processing	12	0	1.03	1
GO:0019220	regulation of phosphate metabolic process	12	0	1.03	1
GO:0019344	cysteine biosynthetic process	11	0	0.95	1
GO:0019684	photosynthesis, light reaction	16	0	1.38	1
GO:0019748	secondary metabolic process	26	0	2.24	1
GO:0022904	respiratory electron transport chain	18	0	1.55	1
GO:0042325	regulation of phosphorylation	11	0	0.95	1
GO:0042398	cellular modified amino acid biosynthetic process	21	0	1.81	1
GO:0042430	indole-containing compound metabolic process	14	0	1.21	1
GO:0042439	ethanolamine-containing compound metabolic process	10	0	0.86	1
GO:0042559	pteridine-containing compound biosynthetic process	11	0	0.95	1
GO:0042773	ATP synthesis coupled electron transport	14	0	1.21	1
GO:0043094	cellular metabolic compound salvage	14	0	1.21	1
GO:0043549	regulation of kinase activity	10	0	0.86	1
GO:0045859	regulation of protein kinase activity	10	0	0.86	1
GO:0045893	positive regulation of transcription, DNA-templated	15	0	1.29	1
GO:0045934	negative regulation of nucleobase-containing compound metabolic process	11	0	0.95	1
GO:0045935	positive regulation of nucleobase-containing compound metabolic process	15	0	1.29	1
GO:0046040	IMP metabolic process	10	0	0.86	1
GO:0046271	phenylpropanoid catabolic process	26	0	2.24	1
GO:0046274	lignin catabolic process	26	0	2.24	1
GO:0046470	phosphatidylcholine metabolic process	10	0	0.86	1
GO:0046839	phospholipid dephosphorylation	12	0	1.03	1
GO:0046856	phosphatidylinositol dephosphorylation	12	0	1.03	1
GO:0051174	regulation of phosphorus metabolic process	12	0	1.03	1
GO:0051254	positive regulation of RNA metabolic process	15	0	1.29	1
GO:0051604	protein maturation	12	0	1.03	1
GO:0071900	regulation of protein serine/threonine kinase activity	10	0	0.86	1
GO:0072348	sulfur compound transport	15	0	1.29	1
GO:0072525	pyridine-containing compound biosynthetic process	13	0	1.12	1
GO:0072593	reactive oxygen species metabolic process	17	0	1.46	1
GO:0097164	ammonium ion metabolic process	17	0	1.46	1
GO:1901068	guanosine-containing compound metabolic process	11	0	0.95	1
GO:1901264	carbohydrate derivative transport	10	0	0.86	1
GO:1902680	positive regulation of RNA biosynthetic process	15	0	1.29	1
GO:1903508	positive regulation of nucleic acid-templated transcription	15	0	1.29	1
GO:1904029	regulation of cyclin-dependent protein kinase activity	10	0	0.86	1

## Sheet: Top 500 H2 GO enrichment
GO.ID	Term	Annotated	Significant	Expected	p.value
GO:0006468	protein phosphorylation	1394	40	19.19	3.7e-06
GO:0016310	phosphorylation	1531	41	21.07	1.5e-05
GO:0006026	aminoglycan catabolic process	19	4	0.26	0.00011
GO:0006030	chitin metabolic process	19	4	0.26	0.00011
GO:0006032	chitin catabolic process	19	4	0.26	0.00011
GO:0046348	amino sugar catabolic process	19	4	0.26	0.00011
GO:1901071	glucosamine-containing compound metabolic process	19	4	0.26	0.00011
GO:1901072	glucosamine-containing compound catabolic process	19	4	0.26	0.00011
GO:0006040	amino sugar metabolic process	20	4	0.28	0.00014
GO:0032501	multicellular organismal process	118	8	1.62	0.00022
GO:0030243	cellulose metabolic process	41	5	0.56	0.00023
GO:0030244	cellulose biosynthetic process	41	5	0.56	0.00023
GO:0006022	aminoglycan metabolic process	24	4	0.33	0.0003
GO:0006464	cellular protein modification process	1808	42	24.88	0.00032
GO:0036211	protein modification process	1808	42	24.88	0.00032
GO:0008037	cell recognition	97	7	1.34	0.00037
GO:0009856	pollination	97	7	1.34	0.00037
GO:0009875	pollen-pistil interaction	97	7	1.34	0.00037
GO:0044706	multi-multicellular organism process	97	7	1.34	0.00037
GO:0048544	recognition of pollen	97	7	1.34	0.00037
GO:0044703	multi-organism reproductive process	102	7	1.4	0.00051
GO:0044702	single organism reproductive process	103	7	1.42	0.00054
GO:0043412	macromolecule modification	1871	42	25.75	0.00065
GO:0051704	multi-organism process	107	7	1.47	0.00068
GO:0051273	beta-glucan metabolic process	52	5	0.72	0.00072
GO:0051274	beta-glucan biosynthetic process	52	5	0.72	0.00072
GO:0019538	protein metabolic process	2940	59	40.46	0.00072
GO:0000003	reproduction	110	7	1.51	0.0008
GO:0022414	reproductive process	110	7	1.51	0.0008
GO:1901136	carbohydrate derivative catabolic process	31	4	0.43	0.00081
GO:0016998	cell wall macromolecule catabolic process	14	3	0.19	0.00083
GO:0044036	cell wall macromolecule metabolic process	14	3	0.19	0.00083
GO:1901565	organonitrogen compound catabolic process	56	5	0.77	0.00101
GO:0006796	phosphate-containing compound metabolic process	1930	42	26.56	0.00124
GO:0006793	phosphorus metabolic process	1932	42	26.59	0.00126
GO:0000271	polysaccharide biosynthetic process	71	5	0.98	0.00291
GO:0009250	glucan biosynthetic process	71	5	0.98	0.00291
GO:0033692	cellular polysaccharide biosynthetic process	71	5	0.98	0.00291
GO:0008152	metabolic process	8732	135	120.18	0.003
GO:0044267	cellular protein metabolic process	2502	49	34.44	0.00428
GO:1901575	organic substance catabolic process	386	12	5.31	0.00706
GO:0009056	catabolic process	389	12	5.35	0.00749
GO:0044248	cellular catabolic process	261	9	3.59	0.01006
GO:0009832	plant-type cell wall biogenesis	12	2	0.17	0.01135
GO:0010215	cellulose microfibril organization	12	2	0.17	0.01135
GO:0016049	cell growth	12	2	0.17	0.01135
GO:0030198	extracellular matrix organization	12	2	0.17	0.01135
GO:0040007	growth	12	2	0.17	0.01135
GO:0043062	extracellular structure organization	12	2	0.17	0.01135
GO:0070726	cell wall assembly	12	2	0.17	0.01135
GO:0071668	plant-type cell wall assembly	12	2	0.17	0.01135
GO:0034637	cellular carbohydrate biosynthetic process	99	5	1.36	0.01176
GO:0071554	cell wall organization or biogenesis	138	6	1.9	0.012
GO:0019439	aromatic compound catabolic process	66	4	0.91	0.01286
GO:1901361	organic cyclic compound catabolic process	66	4	0.91	0.01286
GO:0006073	cellular glucan metabolic process	102	5	1.4	0.01326
GO:0044042	glucan metabolic process	102	5	1.4	0.01326
GO:0044264	cellular polysaccharide metabolic process	102	5	1.4	0.01326
GO:0016051	carbohydrate biosynthetic process	108	5	1.49	0.01663
GO:0005976	polysaccharide metabolic process	114	5	1.57	0.02052
GO:0044262	cellular carbohydrate metabolic process	165	6	2.27	0.02647
GO:0042546	cell wall biogenesis	20	2	0.28	0.03041
GO:0009057	macromolecule catabolic process	221	7	3.04	0.03312
GO:0015074	DNA integration	21	2	0.29	0.03331
GO:0007154	cell communication	619	14	8.52	0.04618
GO:0044710	single-organism metabolic process	2946	50	40.55	0.05294
GO:0009698	phenylpropanoid metabolic process	30	2	0.41	0.06371
GO:0009808	lignin metabolic process	30	2	0.41	0.06371
GO:0046271	phenylpropanoid catabolic process	30	2	0.41	0.06371
GO:0046274	lignin catabolic process	30	2	0.41	0.06371
GO:0044712	single-organism catabolic process	156	5	2.15	0.06428
GO:0019748	secondary metabolic process	33	2	0.45	0.07531
GO:0044723	single-organism carbohydrate metabolic process	325	8	4.47	0.08006
GO:0043170	macromolecule metabolic process	4814	75	66.26	0.09188
GO:0009966	regulation of signal transduction	79	3	1.09	0.09514
GO:0010646	regulation of cell communication	79	3	1.09	0.09514
GO:0023051	regulation of signaling	79	3	1.09	0.09514
GO:0009664	plant-type cell wall organization	42	2	0.58	0.11352
GO:0071669	plant-type cell wall organization or biogenesis	42	2	0.58	0.11352
GO:0055114	oxidation-reduction process	1496	26	20.59	0.12318
GO:0048583	regulation of response to stimulus	92	3	1.27	0.13335
GO:0009072	aromatic amino acid family metabolic process	48	2	0.66	0.14118
GO:0006558	L-phenylalanine metabolic process	11	1	0.15	0.14145
GO:0010498	proteasomal protein catabolic process	11	1	0.15	0.14145
GO:0043161	proteasome-mediated ubiquitin-dependent protein catabolic process	11	1	0.15	0.14145
GO:1902221	erythrose 4-phosphate/phosphoenolpyruvate family amino acid metabolic process	11	1	0.15	0.14145
GO:0006508	proteolysis	560	11	7.71	0.14946
GO:0005975	carbohydrate metabolic process	831	15	11.44	0.17032
GO:0006662	glycerol ether metabolic process	14	1	0.19	0.17645
GO:0018904	ether metabolic process	14	1	0.19	0.17645
GO:0022618	ribonucleoprotein complex assembly	14	1	0.19	0.17645
GO:0071826	ribonucleoprotein complex subunit organization	14	1	0.19	0.17645
GO:0006857	oligopeptide transport	15	1	0.21	0.1878
GO:0015833	peptide transport	15	1	0.21	0.1878
GO:0042886	amide transport	15	1	0.21	0.1878
GO:0070925	organelle assembly	15	1	0.21	0.1878
GO:0006289	nucleotide-excision repair	16	1	0.22	0.199
GO:0006771	riboflavin metabolic process	16	1	0.22	0.199
GO:0009231	riboflavin biosynthetic process	16	1	0.22	0.199
GO:0042726	flavin-containing compound metabolic process	16	1	0.22	0.199
GO:0042727	flavin-containing compound biosynthetic process	16	1	0.22	0.199
GO:0006418	tRNA aminoacylation for protein translation	62	2	0.85	0.20996
GO:0006568	tryptophan metabolic process	17	1	0.23	0.21004
GO:0006586	indolalkylamine metabolic process	17	1	0.23	0.21004
GO:0015696	ammonium transport	17	1	0.23	0.21004
GO:0042430	indole-containing compound metabolic process	17	1	0.23	0.21004
GO:0045229	external encapsulating structure organization	116	3	1.6	0.21448
GO:0071555	cell wall organization	116	3	1.6	0.21448
GO:0043038	amino acid activation	63	2	0.87	0.21501
GO:0043039	tRNA aminoacylation	63	2	0.87	0.21501
GO:0042254	ribosome biogenesis	65	2	0.89	0.22515
GO:0070588	calcium ion transmembrane transport	19	1	0.26	0.23166
GO:0034655	nucleobase-containing compound catabolic process	20	1	0.28	0.24226
GO:1901606	alpha-amino acid catabolic process	20	1	0.28	0.24226
GO:0071704	organic substance metabolic process	6699	97	92.2	0.24502
GO:0006457	protein folding	184	4	2.53	0.24785
GO:0007275	multicellular organism development	21	1	0.29	0.2527
GO:0044707	single-multicellular organism process	21	1	0.29	0.2527
GO:0044260	cellular macromolecule metabolic process	4345	64	59.8	0.2701
GO:0022613	ribonucleoprotein complex biogenesis	74	2	1.02	0.27109
GO:0006721	terpenoid metabolic process	23	1	0.32	0.27317
GO:0016114	terpenoid biosynthetic process	23	1	0.32	0.27317
GO:0006284	base-excision repair	24	1	0.33	0.28319
GO:0009063	cellular amino acid catabolic process	24	1	0.33	0.28319
GO:0071705	nitrogen compound transport	77	2	1.06	0.28642
GO:0006520	cellular amino acid metabolic process	329	6	4.53	0.3001
GO:0044699	single-organism process	5184	75	71.35	0.30627
GO:0032502	developmental process	27	1	0.37	0.31245
GO:0044767	single-organism developmental process	27	1	0.37	0.31245
GO:0044238	primary metabolic process	6435	92	88.57	0.32018
GO:0006816	calcium ion transport	28	1	0.39	0.32193
GO:0016054	organic acid catabolic process	30	1	0.41	0.34051
GO:0046395	carboxylic acid catabolic process	30	1	0.41	0.34051
GO:0034660	ncRNA metabolic process	151	3	2.08	0.34476
GO:0044270	cellular nitrogen compound catabolic process	31	1	0.43	0.34961
GO:0046700	heterocycle catabolic process	31	1	0.43	0.34961
GO:0009110	vitamin biosynthetic process	32	1	0.44	0.35859
GO:0042364	water-soluble vitamin biosynthetic process	32	1	0.44	0.35859
GO:0006766	vitamin metabolic process	34	1	0.47	0.37617
GO:0006767	water-soluble vitamin metabolic process	34	1	0.47	0.37617
GO:0045017	glycerolipid biosynthetic process	35	1	0.48	0.38478
GO:0044282	small molecule catabolic process	36	1	0.5	0.39328
GO:0019752	carboxylic acid metabolic process	578	9	7.96	0.40092
GO:0006081	cellular aldehyde metabolic process	37	1	0.51	0.40165
GO:0006364	rRNA processing	37	1	0.51	0.40165
GO:0016072	rRNA metabolic process	37	1	0.51	0.40165
GO:0043436	oxoacid metabolic process	586	9	8.07	0.4168
GO:0046148	pigment biosynthetic process	39	1	0.54	0.41806
GO:0006082	organic acid metabolic process	587	9	8.08	0.41878
GO:0006979	response to oxidative stress	106	2	1.46	0.43011
GO:0030163	protein catabolic process	175	3	2.41	0.43406
GO:1901135	carbohydrate derivative metabolic process	386	6	5.31	0.43998
GO:0042440	pigment metabolic process	45	1	0.62	0.46466
GO:0006259	DNA metabolic process	255	4	3.51	0.46741
GO:0006576	cellular biogenic amine metabolic process	46	1	0.63	0.47205
GO:0044106	cellular amine metabolic process	46	1	0.63	0.47205
GO:0048193	Golgi vesicle transport	47	1	0.65	0.47935
GO:0044085	cellular component biogenesis	263	4	3.62	0.49137
GO:0006399	tRNA metabolic process	120	2	1.65	0.49406
GO:0032787	monocarboxylic acid metabolic process	194	3	2.67	0.50154
GO:0022607	cellular component assembly	195	3	2.68	0.50499
GO:0070838	divalent metal ion transport	52	1	0.72	0.51435
GO:0072511	divalent inorganic cation transport	52	1	0.72	0.51435
GO:0006511	ubiquitin-dependent protein catabolic process	129	2	1.78	0.53273
GO:0019941	modification-dependent protein catabolic process	129	2	1.78	0.53273
GO:0043632	modification-dependent macromolecule catabolic process	129	2	1.78	0.53273
GO:0006720	isoprenoid metabolic process	55	1	0.76	0.53422
GO:0008299	isoprenoid biosynthetic process	55	1	0.76	0.53422
GO:0044237	cellular metabolic process	5747	79	79.1	0.53783
GO:0006281	DNA repair	134	2	1.84	0.55334
GO:0051716	cellular response to stimulus	657	9	9.04	0.55486
GO:0006486	protein glycosylation	59	1	0.81	0.55946
GO:0043413	macromolecule glycosylation	59	1	0.81	0.55946
GO:0006974	cellular response to DNA damage stimulus	136	2	1.87	0.5614
GO:0007165	signal transduction	516	7	7.1	0.57015
GO:0023052	signaling	516	7	7.1	0.57015
GO:0044700	single organism signaling	516	7	7.1	0.57015
GO:0033554	cellular response to stress	139	2	1.91	0.57329
GO:0009100	glycoprotein metabolic process	64	1	0.88	0.5891
GO:0009101	glycoprotein biosynthetic process	64	1	0.88	0.5891
GO:0006096	glycolytic process	66	1	0.91	0.6004
GO:0006757	ATP generation from ADP	66	1	0.91	0.6004
GO:0009135	purine nucleoside diphosphate metabolic process	66	1	0.91	0.6004
GO:0009179	purine ribonucleoside diphosphate metabolic process	66	1	0.91	0.6004
GO:0009185	ribonucleoside diphosphate metabolic process	66	1	0.91	0.6004
GO:0046031	ADP metabolic process	66	1	0.91	0.6004
GO:0016192	vesicle-mediated transport	225	3	3.1	0.6021
GO:0044257	cellular protein catabolic process	150	2	2.06	0.61491
GO:0051603	proteolysis involved in cellular protein catabolic process	150	2	2.06	0.61491
GO:0008610	lipid biosynthetic process	231	3	3.18	0.61997
GO:0006090	pyruvate metabolic process	70	1	0.96	0.62207
GO:0070085	glycosylation	70	1	0.96	0.62207
GO:0044724	single-organism carbohydrate catabolic process	71	1	0.98	0.6273
GO:0009141	nucleoside triphosphate metabolic process	156	2	2.15	0.63627
GO:0006165	nucleoside diphosphate phosphorylation	73	1	1	0.63755
GO:0046939	nucleotide phosphorylation	73	1	1	0.63755
GO:0009308	amine metabolic process	74	1	1.02	0.64257
GO:0042545	cell wall modification	74	1	1.02	0.64257
GO:0044763	single-organism cellular process	3394	45	46.71	0.64699
GO:0009132	nucleoside diphosphate metabolic process	76	1	1.05	0.65241
GO:0044265	cellular macromolecule catabolic process	165	2	2.27	0.66658
GO:0044711	single-organism biosynthetic process	726	9	9.99	0.67513
GO:0016052	carbohydrate catabolic process	83	1	1.14	0.68475
GO:0044281	small molecule metabolic process	973	12	13.39	0.69693
GO:0006950	response to stress	425	5	5.85	0.70092
GO:0006629	lipid metabolic process	509	6	7.01	0.7075
GO:0034470	ncRNA processing	89	1	1.22	0.71009
GO:1901564	organonitrogen compound metabolic process	1315	16	18.1	0.73719
GO:0006633	fatty acid biosynthetic process	97	1	1.34	0.74075
GO:1901605	alpha-amino acid metabolic process	193	2	2.66	0.74802
GO:0015979	photosynthesis	101	1	1.39	0.75484
GO:0019362	pyridine nucleotide metabolic process	101	1	1.39	0.75484
GO:0046496	nicotinamide nucleotide metabolic process	101	1	1.39	0.75484
GO:0046486	glycerolipid metabolic process	102	1	1.4	0.75825
GO:0006733	oxidoreduction coenzyme metabolic process	106	1	1.46	0.7714
GO:0006412	translation	549	6	7.56	0.77315
GO:0072330	monocarboxylic acid biosynthetic process	107	1	1.47	0.77457
GO:0072524	pyridine-containing compound metabolic process	107	1	1.47	0.77457
GO:0006631	fatty acid metabolic process	108	1	1.49	0.77771
GO:0043043	peptide biosynthetic process	560	6	7.71	0.78916
GO:0050896	response to stimulus	1049	12	14.44	0.78936
GO:0044255	cellular lipid metabolic process	309	3	4.25	0.80254
GO:0006518	peptide metabolic process	578	6	7.96	0.8135
GO:0016567	protein ubiquitination	122	1	1.68	0.81727
GO:0043604	amide biosynthetic process	584	6	8.04	0.82112
GO:0032446	protein modification by small protein conjugation	127	1	1.75	0.82963
GO:1902582	single-organism intracellular transport	128	1	1.76	0.832
GO:0045454	cell redox homeostasis	129	1	1.78	0.83434
GO:0070647	protein modification by small protein conjugation or removal	129	1	1.78	0.83434
GO:0034622	cellular macromolecular complex assembly	132	1	1.82	0.84116
GO:0007264	small GTPase mediated signal transduction	134	1	1.84	0.84555
GO:0015031	protein transport	342	3	4.71	0.85428
GO:0019725	cellular homeostasis	139	1	1.91	0.85601
GO:0043603	cellular amide metabolic process	616	6	8.48	0.85768
GO:0046907	intracellular transport	351	3	4.83	0.86618
GO:0045184	establishment of protein localization	352	3	4.84	0.86745
GO:0046034	ATP metabolic process	145	1	2	0.86764
GO:0065003	macromolecular complex assembly	148	1	2.04	0.87309
GO:0098655	cation transmembrane transport	149	1	2.05	0.87486
GO:0098660	inorganic ion transmembrane transport	149	1	2.05	0.87486
GO:0098662	inorganic cation transmembrane transport	149	1	2.05	0.87486
GO:0009144	purine nucleoside triphosphate metabolic process	152	1	2.09	0.88002
GO:0009199	ribonucleoside triphosphate metabolic process	152	1	2.09	0.88002
GO:0009205	purine ribonucleoside triphosphate metabolic process	152	1	2.09	0.88002
GO:0008104	protein localization	363	3	5	0.88072
GO:0042592	homeostatic process	153	1	2.11	0.8817
GO:0006753	nucleoside phosphate metabolic process	267	2	3.67	0.88605
GO:0009126	purine nucleoside monophosphate metabolic process	159	1	2.19	0.89126
GO:0009167	purine ribonucleoside monophosphate metabolic process	159	1	2.19	0.89126
GO:0015672	monovalent inorganic cation transport	161	1	2.22	0.89427
GO:0006886	intracellular protein transport	274	2	3.77	0.89463
GO:0071840	cellular component organization or biogenesis	573	5	7.89	0.90113
GO:0009161	ribonucleoside monophosphate metabolic process	167	1	2.3	0.90283
GO:0009123	nucleoside monophosphate metabolic process	169	1	2.33	0.90552
GO:0071702	organic substance transport	492	4	6.77	0.91179
GO:0006732	coenzyme metabolic process	176	1	2.42	0.91438
GO:0006091	generation of precursor metabolites and energy	177	1	2.44	0.91558
GO:0034220	ion transmembrane transport	177	1	2.44	0.91558
GO:0042278	purine nucleoside metabolic process	178	1	2.45	0.91676
GO:0046128	purine ribonucleoside metabolic process	178	1	2.45	0.91676
GO:0034613	cellular protein localization	295	2	4.06	0.91691
GO:0070727	cellular macromolecule localization	295	2	4.06	0.91691
GO:0051649	establishment of localization in cell	401	3	5.52	0.91797
GO:0016043	cellular component organization	505	4	6.95	0.92167
GO:0009150	purine ribonucleotide metabolic process	183	1	2.52	0.92242
GO:0055086	nucleobase-containing small molecule metabolic process	307	2	4.23	0.92759
GO:0009119	ribonucleoside metabolic process	188	1	2.59	0.92769
GO:0009259	ribonucleotide metabolic process	188	1	2.59	0.92769
GO:1901137	carbohydrate derivative biosynthetic process	189	1	2.6	0.9287
GO:0044283	small molecule biosynthetic process	312	2	4.29	0.93165
GO:0065008	regulation of biological quality	192	1	2.64	0.93166
GO:0006812	cation transport	420	3	5.78	0.93234
GO:0006163	purine nucleotide metabolic process	194	1	2.67	0.93356
GO:0051641	cellular localization	424	3	5.84	0.93505
GO:0033036	macromolecule localization	432	3	5.95	0.94018
GO:0009116	nucleoside metabolic process	207	1	2.85	0.94469
GO:1901657	glycosyl compound metabolic process	207	1	2.85	0.94469
GO:0019693	ribose phosphate metabolic process	210	1	2.89	0.94698
GO:0072521	purine-containing compound metabolic process	211	1	2.9	0.94772
GO:0043933	macromolecular complex subunit organization	214	1	2.95	0.94989
GO:0051186	cofactor metabolic process	215	1	2.96	0.95059
GO:0009987	cellular process	7770	97	106.94	0.95984
GO:0006396	RNA processing	235	1	3.23	0.96276
GO:0006996	organelle organization	237	1	3.26	0.9638
GO:0035556	intracellular signal transduction	253	1	3.48	0.97114
GO:0009117	nucleotide metabolic process	262	1	3.61	0.97459
GO:0016053	organic acid biosynthetic process	265	1	3.65	0.97565
GO:0046394	carboxylic acid biosynthetic process	265	1	3.65	0.97565
GO:0030001	metal ion transport	267	1	3.67	0.97633
GO:0019637	organophosphate metabolic process	415	2	5.71	0.97996
GO:1901566	organonitrogen compound biosynthetic process	964	7	13.27	0.98231
GO:0055085	transmembrane transport	772	5	10.63	0.98389
GO:0006811	ion transport	559	3	7.69	0.98485
GO:0006810	transport	1784	14	24.55	0.99536
GO:0051234	establishment of localization	1794	14	24.69	0.99573
GO:0051179	localization	1807	14	24.87	0.99616
GO:0044765	single-organism transport	1238	8	17.04	0.99648
GO:1902578	single-organism localization	1261	8	17.36	0.99718
GO:0034645	cellular macromolecule biosynthetic process	2016	15	27.75	0.99858
GO:0009059	macromolecule biosynthetic process	2017	15	27.76	0.99859
GO:1901360	organic cyclic compound metabolic process	2395	18	32.96	0.99942
GO:0009058	biosynthetic process	2872	23	39.53	0.99955
GO:0006807	nitrogen compound metabolic process	3138	26	43.19	0.99957
GO:0006725	cellular aromatic compound metabolic process	2353	17	32.39	0.99963
GO:0050794	regulation of cellular process	1815	11	24.98	0.99976
GO:0050789	regulation of biological process	1862	11	25.63	0.99985
GO:0044249	cellular biosynthetic process	2667	19	36.71	0.99989
GO:0065007	biological regulation	1905	11	26.22	0.99991
GO:1901576	organic substance biosynthetic process	2696	19	37.11	0.99992
GO:0090304	nucleic acid metabolic process	1817	10	25.01	0.99992
GO:0046483	heterocycle metabolic process	2325	15	32	0.99992
GO:0006139	nucleobase-containing compound metabolic process	2166	13	29.81	0.99995
GO:0034641	cellular nitrogen compound metabolic process	2857	19	39.32	0.99998
GO:0006355	regulation of transcription, DNA-templated	1104	3	15.19	0.99998
GO:1903506	regulation of nucleic acid-templated transcription	1104	3	15.19	0.99998
GO:2001141	regulation of RNA biosynthetic process	1104	3	15.19	0.99998
GO:0051252	regulation of RNA metabolic process	1107	3	15.24	0.99998
GO:0019219	regulation of nucleobase-containing compound metabolic process	1118	3	15.39	0.99999
GO:0009889	regulation of biosynthetic process	1120	3	15.42	0.99999
GO:0010556	regulation of macromolecule biosynthetic process	1120	3	15.42	0.99999
GO:0031326	regulation of cellular biosynthetic process	1120	3	15.42	0.99999
GO:2000112	regulation of cellular macromolecule biosynthetic process	1120	3	15.42	0.99999
GO:0051171	regulation of nitrogen compound metabolic process	1128	3	15.53	0.99999
GO:0010468	regulation of gene expression	1131	3	15.57	0.99999
GO:0031323	regulation of cellular metabolic process	1149	3	15.81	0.99999
GO:0080090	regulation of primary metabolic process	1152	3	15.86	0.99999
GO:0060255	regulation of macromolecule metabolic process	1169	3	16.09	0.99999
GO:0016070	RNA metabolic process	1571	6	21.62	0.99999
GO:0019222	regulation of metabolic process	1178	3	16.21	0.99999
GO:0010467	gene expression	2058	10	28.33	0.99999
GO:0044271	cellular nitrogen compound biosynthetic process	2076	10	28.57	1
GO:0006351	transcription, DNA-templated	1239	3	17.05	1
GO:0097659	nucleic acid-templated transcription	1239	3	17.05	1
GO:0032774	RNA biosynthetic process	1241	3	17.08	1
GO:0018130	heterocycle biosynthetic process	1530	4	21.06	1
GO:0034654	nucleobase-containing compound biosynthetic process	1390	3	19.13	1
GO:1901362	organic cyclic compound biosynthetic process	1566	4	21.55	1
GO:0019438	aromatic compound biosynthetic process	1506	3	20.73	1
GO:0008150	biological_process	11625	160	160	1
GO:0000041	transition metal ion transport	22	0	0.3	1
GO:0000079	regulation of cyclin-dependent protein serine/threonine kinase activity	14	0	0.19	1
GO:0000096	sulfur amino acid metabolic process	33	0	0.45	1
GO:0000097	sulfur amino acid biosynthetic process	27	0	0.37	1
GO:0000105	histidine biosynthetic process	13	0	0.18	1
GO:0000160	phosphorelay signal transduction system	85	0	1.17	1
GO:0000226	microtubule cytoskeleton organization	28	0	0.39	1
GO:0000272	polysaccharide catabolic process	12	0	0.17	1
GO:0000278	mitotic cell cycle	23	0	0.32	1
GO:0000280	nuclear division	19	0	0.26	1
GO:0000375	RNA splicing, via transesterification reactions	25	0	0.34	1
GO:0000377	RNA splicing, via transesterification reactions with bulged adenosine as nucleophile	25	0	0.34	1
GO:0000398	mRNA splicing, via spliceosome	25	0	0.34	1
GO:0000413	protein peptidyl-prolyl isomerization	43	0	0.59	1
GO:0000910	cytokinesis	22	0	0.3	1
GO:0001101	response to acid chemical	10	0	0.14	1
GO:0001510	RNA methylation	13	0	0.18	1
GO:0001522	pseudouridine synthesis	22	0	0.3	1
GO:0001932	regulation of protein phosphorylation	15	0	0.21	1
GO:0003333	amino acid transmembrane transport	28	0	0.39	1
GO:0005977	glycogen metabolic process	12	0	0.17	1
GO:0005978	glycogen biosynthetic process	12	0	0.17	1
GO:0005984	disaccharide metabolic process	43	0	0.59	1
GO:0005985	sucrose metabolic process	18	0	0.25	1
GO:0005991	trehalose metabolic process	25	0	0.34	1
GO:0005992	trehalose biosynthetic process	23	0	0.32	1
GO:0005996	monosaccharide metabolic process	59	0	0.81	1
GO:0006006	glucose metabolic process	22	0	0.3	1
GO:0006012	galactose metabolic process	11	0	0.15	1
GO:0006066	alcohol metabolic process	37	0	0.51	1
GO:0006074	(1->3)-beta-D-glucan metabolic process	11	0	0.15	1
GO:0006075	(1->3)-beta-D-glucan biosynthetic process	11	0	0.15	1
GO:0006098	pentose-phosphate shunt	22	0	0.3	1
GO:0006099	tricarboxylic acid cycle	21	0	0.29	1
GO:0006101	citrate metabolic process	21	0	0.29	1
GO:0006108	malate metabolic process	23	0	0.32	1
GO:0006112	energy reserve metabolic process	12	0	0.17	1
GO:0006119	oxidative phosphorylation	27	0	0.37	1
GO:0006122	mitochondrial electron transport, ubiquinol to cytochrome c	10	0	0.14	1
GO:0006164	purine nucleotide biosynthetic process	82	0	1.13	1
GO:0006188	IMP biosynthetic process	13	0	0.18	1
GO:0006206	pyrimidine nucleobase metabolic process	14	0	0.19	1
GO:0006207	'de novo' pyrimidine nucleobase biosynthetic process	12	0	0.17	1
GO:0006213	pyrimidine nucleoside metabolic process	14	0	0.19	1
GO:0006220	pyrimidine nucleotide metabolic process	31	0	0.43	1
GO:0006221	pyrimidine nucleotide biosynthetic process	29	0	0.4	1
GO:0006260	DNA replication	74	0	1.02	1
GO:0006261	DNA-dependent DNA replication	16	0	0.22	1
GO:0006265	DNA topological change	13	0	0.18	1
GO:0006298	mismatch repair	12	0	0.17	1
GO:0006310	DNA recombination	29	0	0.4	1
GO:0006323	DNA packaging	40	0	0.55	1
GO:0006325	chromatin organization	83	0	1.14	1
GO:0006333	chromatin assembly or disassembly	40	0	0.55	1
GO:0006334	nucleosome assembly	38	0	0.52	1
GO:0006352	DNA-templated transcription, initiation	54	0	0.74	1
GO:0006354	DNA-templated transcription, elongation	13	0	0.18	1
GO:0006357	regulation of transcription from RNA polymerase II promoter	32	0	0.44	1
GO:0006366	transcription from RNA polymerase II promoter	48	0	0.66	1
GO:0006367	transcription initiation from RNA polymerase II promoter	16	0	0.22	1
GO:0006397	mRNA processing	66	0	0.91	1
GO:0006400	tRNA modification	21	0	0.29	1
GO:0006413	translational initiation	34	0	0.47	1
GO:0006414	translational elongation	31	0	0.43	1
GO:0006415	translational termination	17	0	0.23	1
GO:0006417	regulation of translation	10	0	0.14	1
GO:0006461	protein complex assembly	133	0	1.83	1
GO:0006465	signal peptide processing	12	0	0.17	1
GO:0006470	protein dephosphorylation	85	0	1.17	1
GO:0006479	protein methylation	34	0	0.47	1
GO:0006487	protein N-linked glycosylation	11	0	0.15	1
GO:0006497	protein lipidation	19	0	0.26	1
GO:0006505	GPI anchor metabolic process	20	0	0.28	1
GO:0006506	GPI anchor biosynthetic process	17	0	0.23	1
GO:0006525	arginine metabolic process	12	0	0.17	1
GO:0006534	cysteine metabolic process	17	0	0.23	1
GO:0006535	cysteine biosynthetic process from serine	14	0	0.19	1
GO:0006536	glutamate metabolic process	12	0	0.17	1
GO:0006541	glutamine metabolic process	14	0	0.19	1
GO:0006544	glycine metabolic process	19	0	0.26	1
GO:0006547	histidine metabolic process	13	0	0.18	1
GO:0006553	lysine metabolic process	16	0	0.22	1
GO:0006555	methionine metabolic process	14	0	0.19	1
GO:0006563	L-serine metabolic process	31	0	0.43	1
GO:0006575	cellular modified amino acid metabolic process	47	0	0.65	1
GO:0006595	polyamine metabolic process	13	0	0.18	1
GO:0006596	polyamine biosynthetic process	10	0	0.14	1
GO:0006605	protein targeting	41	0	0.56	1
GO:0006606	protein import into nucleus	10	0	0.14	1
GO:0006612	protein targeting to membrane	17	0	0.23	1
GO:0006613	cotranslational protein targeting to membrane	17	0	0.23	1
GO:0006614	SRP-dependent cotranslational protein targeting to membrane	17	0	0.23	1
GO:0006643	membrane lipid metabolic process	38	0	0.52	1
GO:0006644	phospholipid metabolic process	118	0	1.62	1
GO:0006650	glycerophospholipid metabolic process	92	0	1.27	1
GO:0006661	phosphatidylinositol biosynthetic process	18	0	0.25	1
GO:0006664	glycolipid metabolic process	31	0	0.43	1
GO:0006665	sphingolipid metabolic process	11	0	0.15	1
GO:0006672	ceramide metabolic process	10	0	0.14	1
GO:0006694	steroid biosynthetic process	15	0	0.21	1
GO:0006739	NADP metabolic process	26	0	0.36	1
GO:0006749	glutathione metabolic process	14	0	0.19	1
GO:0006754	ATP biosynthetic process	48	0	0.66	1
GO:0006760	folic acid-containing compound metabolic process	18	0	0.25	1
GO:0006778	porphyrin-containing compound metabolic process	35	0	0.48	1
GO:0006779	porphyrin-containing compound biosynthetic process	29	0	0.4	1
GO:0006790	sulfur compound metabolic process	92	0	1.27	1
GO:0006801	superoxide metabolic process	18	0	0.25	1
GO:0006813	potassium ion transport	59	0	0.81	1
GO:0006814	sodium ion transport	11	0	0.15	1
GO:0006818	hydrogen transport	74	0	1.02	1
GO:0006820	anion transport	126	0	1.73	1
GO:0006821	chloride transport	11	0	0.15	1
GO:0006835	dicarboxylic acid transport	18	0	0.25	1
GO:0006839	mitochondrial transport	18	0	0.25	1
GO:0006855	drug transmembrane transport	60	0	0.83	1
GO:0006865	amino acid transport	28	0	0.39	1
GO:0006869	lipid transport	64	0	0.88	1
GO:0006887	exocytosis	47	0	0.65	1
GO:0006888	ER to Golgi vesicle-mediated transport	24	0	0.33	1
GO:0006900	membrane budding	13	0	0.18	1
GO:0006901	vesicle coating	13	0	0.18	1
GO:0006904	vesicle docking involved in exocytosis	16	0	0.22	1
GO:0006913	nucleocytoplasmic transport	74	0	1.02	1
GO:0006928	movement of cell or subcellular component	93	0	1.28	1
GO:0006952	defense response	64	0	0.88	1
GO:0007005	mitochondrion organization	14	0	0.19	1
GO:0007010	cytoskeleton organization	58	0	0.8	1
GO:0007015	actin filament organization	16	0	0.22	1
GO:0007017	microtubule-based process	166	0	2.28	1
GO:0007018	microtubule-based movement	90	0	1.24	1
GO:0007034	vacuolar transport	19	0	0.26	1
GO:0007049	cell cycle	87	0	1.2	1
GO:0007059	chromosome segregation	11	0	0.15	1
GO:0007067	mitotic nuclear division	14	0	0.19	1
GO:0007186	G-protein coupled receptor signaling pathway	33	0	0.45	1
GO:0008033	tRNA processing	58	0	0.8	1
GO:0008064	regulation of actin polymerization or depolymerization	14	0	0.19	1
GO:0008154	actin polymerization or depolymerization	16	0	0.22	1
GO:0008202	steroid metabolic process	18	0	0.25	1
GO:0008213	protein alkylation	34	0	0.47	1
GO:0008272	sulfate transport	18	0	0.25	1
GO:0008380	RNA splicing	33	0	0.45	1
GO:0008643	carbohydrate transport	11	0	0.15	1
GO:0008652	cellular amino acid biosynthetic process	158	0	2.17	1
GO:0008654	phospholipid biosynthetic process	46	0	0.63	1
GO:0009060	aerobic respiration	27	0	0.37	1
GO:0009064	glutamine family amino acid metabolic process	41	0	0.56	1
GO:0009066	aspartate family amino acid metabolic process	38	0	0.52	1
GO:0009067	aspartate family amino acid biosynthetic process	34	0	0.47	1
GO:0009069	serine family amino acid metabolic process	44	0	0.61	1
GO:0009070	serine family amino acid biosynthetic process	25	0	0.34	1
GO:0009073	aromatic amino acid family biosynthetic process	29	0	0.4	1
GO:0009081	branched-chain amino acid metabolic process	16	0	0.22	1
GO:0009082	branched-chain amino acid biosynthetic process	13	0	0.18	1
GO:0009084	glutamine family amino acid biosynthetic process	27	0	0.37	1
GO:0009085	lysine biosynthetic process	16	0	0.22	1
GO:0009086	methionine biosynthetic process	12	0	0.17	1
GO:0009089	lysine biosynthetic process via diaminopimelate	16	0	0.22	1
GO:0009095	aromatic amino acid family biosynthetic process, prephenate pathway	10	0	0.14	1
GO:0009108	coenzyme biosynthetic process	75	0	1.03	1
GO:0009112	nucleobase metabolic process	23	0	0.32	1
GO:0009124	nucleoside monophosphate biosynthetic process	72	0	0.99	1
GO:0009127	purine nucleoside monophosphate biosynthetic process	62	0	0.85	1
GO:0009142	nucleoside triphosphate biosynthetic process	55	0	0.76	1
GO:0009145	purine nucleoside triphosphate biosynthetic process	55	0	0.76	1
GO:0009152	purine ribonucleotide biosynthetic process	75	0	1.03	1
GO:0009156	ribonucleoside monophosphate biosynthetic process	70	0	0.96	1
GO:0009163	nucleoside biosynthetic process	78	0	1.07	1
GO:0009165	nucleotide biosynthetic process	125	0	1.72	1
GO:0009168	purine ribonucleoside monophosphate biosynthetic process	62	0	0.85	1
GO:0009201	ribonucleoside triphosphate biosynthetic process	55	0	0.76	1
GO:0009206	purine ribonucleoside triphosphate biosynthetic process	55	0	0.76	1
GO:0009218	pyrimidine ribonucleotide metabolic process	12	0	0.17	1
GO:0009220	pyrimidine ribonucleotide biosynthetic process	12	0	0.17	1
GO:0009225	nucleotide-sugar metabolic process	11	0	0.15	1
GO:0009247	glycolipid biosynthetic process	24	0	0.33	1
GO:0009260	ribonucleotide biosynthetic process	80	0	1.1	1
GO:0009266	response to temperature stimulus	16	0	0.22	1
GO:0009309	amine biosynthetic process	22	0	0.3	1
GO:0009311	oligosaccharide metabolic process	48	0	0.66	1
GO:0009312	oligosaccharide biosynthetic process	30	0	0.41	1
GO:0009396	folic acid-containing compound biosynthetic process	15	0	0.21	1
GO:0009408	response to heat	16	0	0.22	1
GO:0009451	RNA modification	57	0	0.78	1
GO:0009605	response to external stimulus	13	0	0.18	1
GO:0009607	response to biotic stimulus	27	0	0.37	1
GO:0009611	response to wounding	12	0	0.17	1
GO:0009628	response to abiotic stimulus	29	0	0.4	1
GO:0009719	response to endogenous stimulus	46	0	0.63	1
GO:0009725	response to hormone	46	0	0.63	1
GO:0009767	photosynthetic electron transport chain	10	0	0.14	1
GO:0009890	negative regulation of biosynthetic process	13	0	0.18	1
GO:0009891	positive regulation of biosynthetic process	22	0	0.3	1
GO:0009892	negative regulation of metabolic process	35	0	0.48	1
GO:0009893	positive regulation of metabolic process	24	0	0.33	1
GO:0009894	regulation of catabolic process	11	0	0.15	1
GO:0010033	response to organic substance	46	0	0.63	1
GO:0010035	response to inorganic substance	17	0	0.23	1
GO:0010557	positive regulation of macromolecule biosynthetic process	22	0	0.3	1
GO:0010558	negative regulation of macromolecule biosynthetic process	13	0	0.18	1
GO:0010604	positive regulation of macromolecule metabolic process	22	0	0.3	1
GO:0010605	negative regulation of macromolecule metabolic process	35	0	0.48	1
GO:0010608	posttranscriptional regulation of gene expression	10	0	0.14	1
GO:0010628	positive regulation of gene expression	22	0	0.3	1
GO:0010629	negative regulation of gene expression	29	0	0.4	1
GO:0010638	positive regulation of organelle organization	11	0	0.15	1
GO:0010876	lipid localization	64	0	0.88	1
GO:0015693	magnesium ion transport	15	0	0.21	1
GO:0015698	inorganic anion transport	45	0	0.62	1
GO:0015711	organic anion transport	66	0	0.91	1
GO:0015740	C4-dicarboxylate transport	18	0	0.25	1
GO:0015743	malate transport	18	0	0.25	1
GO:0015748	organophosphate ester transport	19	0	0.26	1
GO:0015849	organic acid transport	51	0	0.7	1
GO:0015893	drug transport	60	0	0.83	1
GO:0015914	phospholipid transport	15	0	0.21	1
GO:0015936	coenzyme A metabolic process	12	0	0.17	1
GO:0015980	energy derivation by oxidation of organic compounds	75	0	1.03	1
GO:0015985	energy coupled proton transport, down electrochemical gradient	37	0	0.51	1
GO:0015986	ATP synthesis coupled proton transport	37	0	0.51	1
GO:0015988	energy coupled proton transmembrane transport, against electrochemical gradient	37	0	0.51	1
GO:0015991	ATP hydrolysis coupled proton transport	37	0	0.51	1
GO:0015992	proton transport	74	0	1.02	1
GO:0015994	chlorophyll metabolic process	17	0	0.23	1
GO:0015995	chlorophyll biosynthetic process	14	0	0.19	1
GO:0016042	lipid catabolic process	22	0	0.3	1
GO:0016050	vesicle organization	14	0	0.19	1
GO:0016071	mRNA metabolic process	76	0	1.05	1
GO:0016226	iron-sulfur cluster assembly	24	0	0.33	1
GO:0016311	dephosphorylation	116	0	1.6	1
GO:0016458	gene silencing	17	0	0.23	1
GO:0016482	cytoplasmic transport	134	0	1.84	1
GO:0016485	protein processing	20	0	0.28	1
GO:0016568	chromatin modification	43	0	0.59	1
GO:0016569	covalent chromatin modification	38	0	0.52	1
GO:0016570	histone modification	38	0	0.52	1
GO:0016571	histone methylation	18	0	0.25	1
GO:0017038	protein import	19	0	0.26	1
GO:0018022	peptidyl-lysine methylation	19	0	0.26	1
GO:0018193	peptidyl-amino acid modification	79	0	1.09	1
GO:0018205	peptidyl-lysine modification	29	0	0.4	1
GO:0018208	peptidyl-proline modification	43	0	0.59	1
GO:0019220	regulation of phosphate metabolic process	16	0	0.22	1
GO:0019318	hexose metabolic process	49	0	0.67	1
GO:0019321	pentose metabolic process	10	0	0.14	1
GO:0019344	cysteine biosynthetic process	15	0	0.21	1
GO:0019359	nicotinamide nucleotide biosynthetic process	13	0	0.18	1
GO:0019363	pyridine nucleotide biosynthetic process	13	0	0.18	1
GO:0019674	NAD metabolic process	13	0	0.18	1
GO:0019682	glyceraldehyde-3-phosphate metabolic process	24	0	0.33	1
GO:0019684	photosynthesis, light reaction	22	0	0.3	1
GO:0019751	polyol metabolic process	19	0	0.26	1
GO:0019856	pyrimidine nucleobase biosynthetic process	14	0	0.19	1
GO:0022402	cell cycle process	59	0	0.81	1
GO:0022406	membrane docking	18	0	0.25	1
GO:0022411	cellular component disassembly	24	0	0.33	1
GO:0022900	electron transport chain	62	0	0.85	1
GO:0022904	respiratory electron transport chain	36	0	0.5	1
GO:0030029	actin filament-based process	17	0	0.23	1
GO:0030036	actin cytoskeleton organization	17	0	0.23	1
GO:0030041	actin filament polymerization	14	0	0.19	1
GO:0030258	lipid modification	52	0	0.72	1
GO:0030259	lipid glycosylation	11	0	0.15	1
GO:0030832	regulation of actin filament length	14	0	0.19	1
GO:0030833	regulation of actin filament polymerization	14	0	0.19	1
GO:0030838	positive regulation of actin filament polymerization	11	0	0.15	1
GO:0031047	gene silencing by RNA	17	0	0.23	1
GO:0031123	RNA 3'-end processing	11	0	0.15	1
GO:0031163	metallo-sulfur cluster assembly	24	0	0.33	1
GO:0031324	negative regulation of cellular metabolic process	18	0	0.25	1
GO:0031325	positive regulation of cellular metabolic process	23	0	0.32	1
GO:0031327	negative regulation of cellular biosynthetic process	13	0	0.18	1
GO:0031328	positive regulation of cellular biosynthetic process	22	0	0.3	1
GO:0031334	positive regulation of protein complex assembly	11	0	0.15	1
GO:0031347	regulation of defense response	10	0	0.14	1
GO:0031399	regulation of protein modification process	19	0	0.26	1
GO:0031497	chromatin assembly	38	0	0.52	1
GO:0032259	methylation	70	0	0.96	1
GO:0032268	regulation of cellular protein metabolic process	29	0	0.4	1
GO:0032271	regulation of protein polymerization	14	0	0.19	1
GO:0032273	positive regulation of protein polymerization	11	0	0.15	1
GO:0032507	maintenance of protein location in cell	11	0	0.15	1
GO:0032535	regulation of cellular component size	16	0	0.22	1
GO:0032784	regulation of DNA-templated transcription, elongation	13	0	0.18	1
GO:0032940	secretion by cell	50	0	0.69	1
GO:0032956	regulation of actin cytoskeleton organization	14	0	0.19	1
GO:0032970	regulation of actin filament-based process	14	0	0.19	1
GO:0032984	macromolecular complex disassembly	24	0	0.33	1
GO:0033013	tetrapyrrole metabolic process	46	0	0.63	1
GO:0033014	tetrapyrrole biosynthetic process	40	0	0.55	1
GO:0033043	regulation of organelle organization	20	0	0.28	1
GO:0033365	protein localization to organelle	45	0	0.62	1
GO:0033865	nucleoside bisphosphate metabolic process	17	0	0.23	1
GO:0033875	ribonucleoside bisphosphate metabolic process	17	0	0.23	1
GO:0034032	purine nucleoside bisphosphate metabolic process	17	0	0.23	1
GO:0034248	regulation of cellular amide metabolic process	10	0	0.14	1
GO:0034314	Arp2/3 complex-mediated actin nucleation	11	0	0.15	1
GO:0034504	protein localization to nucleus	10	0	0.14	1
GO:0034728	nucleosome organization	38	0	0.52	1
GO:0034968	histone lysine methylation	18	0	0.25	1
GO:0042157	lipoprotein metabolic process	19	0	0.26	1
GO:0042158	lipoprotein biosynthetic process	19	0	0.26	1
GO:0042176	regulation of protein catabolic process	10	0	0.14	1
GO:0042180	cellular ketone metabolic process	14	0	0.19	1
GO:0042181	ketone biosynthetic process	10	0	0.14	1
GO:0042221	response to chemical	123	0	1.69	1
GO:0042325	regulation of phosphorylation	15	0	0.21	1
GO:0042398	cellular modified amino acid biosynthetic process	32	0	0.44	1
GO:0042401	cellular biogenic amine biosynthetic process	22	0	0.3	1
GO:0042439	ethanolamine-containing compound metabolic process	12	0	0.17	1
GO:0042451	purine nucleoside biosynthetic process	70	0	0.96	1
GO:0042455	ribonucleoside biosynthetic process	78	0	1.07	1
GO:0042493	response to drug	60	0	0.83	1
GO:0042558	pteridine-containing compound metabolic process	20	0	0.28	1
GO:0042559	pteridine-containing compound biosynthetic process	17	0	0.23	1
GO:0042773	ATP synthesis coupled electron transport	27	0	0.37	1
GO:0042775	mitochondrial ATP synthesis coupled electron transport	11	0	0.15	1
GO:0043094	cellular metabolic compound salvage	20	0	0.28	1
GO:0043101	purine-containing compound salvage	11	0	0.15	1
GO:0043241	protein complex disassembly	24	0	0.33	1
GO:0043254	regulation of protein complex assembly	14	0	0.19	1
GO:0043414	macromolecule methylation	55	0	0.76	1
GO:0043549	regulation of kinase activity	14	0	0.19	1
GO:0043623	cellular protein complex assembly	79	0	1.09	1
GO:0043624	cellular protein complex disassembly	22	0	0.3	1
GO:0043648	dicarboxylic acid metabolic process	55	0	0.76	1
GO:0044087	regulation of cellular component biogenesis	17	0	0.23	1
GO:0044089	positive regulation of cellular component biogenesis	11	0	0.15	1
GO:0044242	cellular lipid catabolic process	10	0	0.14	1
GO:0044272	sulfur compound biosynthetic process	64	0	0.88	1
GO:0044744	protein targeting to nucleus	10	0	0.14	1
GO:0044802	single-organism membrane organization	29	0	0.4	1
GO:0045010	actin nucleation	11	0	0.15	1
GO:0045047	protein targeting to ER	17	0	0.23	1
GO:0045185	maintenance of protein location	11	0	0.15	1
GO:0045333	cellular respiration	63	0	0.87	1
GO:0045859	regulation of protein kinase activity	14	0	0.19	1
GO:0045893	positive regulation of transcription, DNA-templated	18	0	0.25	1
GO:0045934	negative regulation of nucleobase-containing compound metabolic process	12	0	0.17	1
GO:0045935	positive regulation of nucleobase-containing compound metabolic process	18	0	0.25	1
GO:0046040	IMP metabolic process	13	0	0.18	1
GO:0046112	nucleobase biosynthetic process	21	0	0.29	1
GO:0046129	purine ribonucleoside biosynthetic process	70	0	0.96	1
GO:0046131	pyrimidine ribonucleoside metabolic process	14	0	0.19	1
GO:0046132	pyrimidine ribonucleoside biosynthetic process	12	0	0.17	1
GO:0046134	pyrimidine nucleoside biosynthetic process	12	0	0.17	1
GO:0046351	disaccharide biosynthetic process	26	0	0.36	1
GO:0046390	ribose phosphate biosynthetic process	80	0	1.1	1
GO:0046451	diaminopimelate metabolic process	16	0	0.22	1
GO:0046467	membrane lipid biosynthetic process	25	0	0.34	1
GO:0046470	phosphatidylcholine metabolic process	12	0	0.17	1
GO:0046474	glycerophospholipid biosynthetic process	25	0	0.34	1
GO:0046488	phosphatidylinositol metabolic process	74	0	1.02	1
GO:0046834	lipid phosphorylation	14	0	0.19	1
GO:0046839	phospholipid dephosphorylation	21	0	0.29	1
GO:0046854	phosphatidylinositol phosphorylation	14	0	0.19	1
GO:0046856	phosphatidylinositol dephosphorylation	21	0	0.29	1
GO:0046903	secretion	50	0	0.69	1
GO:0046942	carboxylic acid transport	51	0	0.7	1
GO:0048268	clathrin coat assembly	13	0	0.18	1
GO:0048278	vesicle docking	18	0	0.25	1
GO:0048285	organelle fission	25	0	0.34	1
GO:0048518	positive regulation of biological process	36	0	0.5	1
GO:0048519	negative regulation of biological process	45	0	0.62	1
GO:0048522	positive regulation of cellular process	35	0	0.48	1
GO:0048523	negative regulation of cellular process	28	0	0.39	1
GO:0048856	anatomical structure development	12	0	0.17	1
GO:0048878	chemical homeostasis	10	0	0.14	1
GO:0050790	regulation of catalytic activity	23	0	0.32	1
GO:0050801	ion homeostasis	10	0	0.14	1
GO:0051052	regulation of DNA metabolic process	11	0	0.15	1
GO:0051128	regulation of cellular component organization	33	0	0.45	1
GO:0051130	positive regulation of cellular component organization	15	0	0.21	1
GO:0051156	glucose 6-phosphate metabolic process	22	0	0.3	1
GO:0051169	nuclear transport	74	0	1.02	1
GO:0051170	nuclear import	10	0	0.14	1
GO:0051172	negative regulation of nitrogen compound metabolic process	15	0	0.21	1
GO:0051173	positive regulation of nitrogen compound metabolic process	22	0	0.3	1
GO:0051174	regulation of phosphorus metabolic process	16	0	0.22	1
GO:0051188	cofactor biosynthetic process	106	0	1.46	1
GO:0051205	protein insertion into membrane	10	0	0.14	1
GO:0051220	cytoplasmic sequestering of protein	11	0	0.15	1
GO:0051235	maintenance of location	11	0	0.15	1
GO:0051246	regulation of protein metabolic process	36	0	0.5	1
GO:0051254	positive regulation of RNA metabolic process	18	0	0.25	1
GO:0051258	protein polymerization	47	0	0.65	1
GO:0051276	chromosome organization	120	0	1.65	1
GO:0051301	cell division	29	0	0.4	1
GO:0051338	regulation of transferase activity	17	0	0.23	1
GO:0051493	regulation of cytoskeleton organization	14	0	0.19	1
GO:0051495	positive regulation of cytoskeleton organization	11	0	0.15	1
GO:0051604	protein maturation	20	0	0.28	1
GO:0051651	maintenance of location in cell	11	0	0.15	1
GO:0051726	regulation of cell cycle	30	0	0.41	1
GO:0052803	imidazole-containing compound metabolic process	13	0	0.18	1
GO:0055080	cation homeostasis	10	0	0.14	1
GO:0061024	membrane organization	42	0	0.58	1
GO:0065004	protein-DNA complex assembly	40	0	0.55	1
GO:0065009	regulation of molecular function	25	0	0.34	1
GO:0070271	protein complex biogenesis	133	0	1.83	1
GO:0070887	cellular response to chemical stimulus	12	0	0.17	1
GO:0070972	protein localization to endoplasmic reticulum	25	0	0.34	1
GO:0071103	DNA conformation change	53	0	0.73	1
GO:0071804	cellular potassium ion transport	39	0	0.54	1
GO:0071805	potassium ion transmembrane transport	39	0	0.54	1
GO:0071822	protein complex subunit organization	154	0	2.12	1
GO:0071824	protein-DNA complex subunit organization	40	0	0.55	1
GO:0071900	regulation of protein serine/threonine kinase activity	14	0	0.19	1
GO:0072348	sulfur compound transport	18	0	0.25	1
GO:0072350	tricarboxylic acid metabolic process	29	0	0.4	1
GO:0072522	purine-containing compound biosynthetic process	97	0	1.34	1
GO:0072525	pyridine-containing compound biosynthetic process	19	0	0.26	1
GO:0072527	pyrimidine-containing compound metabolic process	48	0	0.66	1
GO:0072528	pyrimidine-containing compound biosynthetic process	44	0	0.61	1
GO:0072593	reactive oxygen species metabolic process	20	0	0.28	1
GO:0072594	establishment of protein localization to organelle	36	0	0.5	1
GO:0072599	establishment of protein localization to endoplasmic reticulum	17	0	0.23	1
GO:0072657	protein localization to membrane	28	0	0.39	1
GO:0080134	regulation of response to stress	11	0	0.15	1
GO:0090066	regulation of anatomical structure size	16	0	0.22	1
GO:0090150	establishment of protein localization to membrane	28	0	0.39	1
GO:0090407	organophosphate biosynthetic process	184	0	2.53	1
GO:0090662	ATP hydrolysis coupled transmembrane transport	37	0	0.51	1
GO:0097164	ammonium ion metabolic process	19	0	0.26	1
GO:0098656	anion transmembrane transport	28	0	0.39	1
GO:0098771	inorganic ion homeostasis	10	0	0.14	1
GO:0098813	nuclear chromosome segregation	11	0	0.15	1
GO:1901068	guanosine-containing compound metabolic process	13	0	0.18	1
GO:1901264	carbohydrate derivative transport	13	0	0.18	1
GO:1901293	nucleoside phosphate biosynthetic process	125	0	1.72	1
GO:1901607	alpha-amino acid biosynthetic process	134	0	1.84	1
GO:1901615	organic hydroxy compound metabolic process	45	0	0.62	1
GO:1901617	organic hydroxy compound biosynthetic process	12	0	0.17	1
GO:1901659	glycosyl compound biosynthetic process	78	0	1.07	1
GO:1901661	quinone metabolic process	10	0	0.14	1
GO:1901663	quinone biosynthetic process	10	0	0.14	1
GO:1901700	response to oxygen-containing compound	17	0	0.23	1
GO:1902580	single-organism cellular localization	48	0	0.66	1
GO:1902589	single-organism organelle organization	116	0	1.6	1
GO:1902593	single-organism nuclear import	10	0	0.14	1
GO:1902600	hydrogen ion transmembrane transport	65	0	0.89	1
GO:1902680	positive regulation of RNA biosynthetic process	18	0	0.25	1
GO:1903047	mitotic cell cycle process	23	0	0.32	1
GO:1903508	positive regulation of nucleic acid-templated transcription	18	0	0.25	1
GO:1903509	liposaccharide metabolic process	31	0	0.43	1
GO:1903825	organic acid transmembrane transport	28	0	0.39	1
GO:1904029	regulation of cyclin-dependent protein kinase activity	14	0	0.19	1
GO:2000113	negative regulation of cellular macromolecule biosynthetic process	13	0	0.18	1

## Sheet: Top 500 Qst GO enrichment
GO.ID	Term	Annotated	Significant	Expected	p.value
GO:0006412	translation	549	45	8.88	4.2e-20
GO:0006518	peptide metabolic process	578	46	9.35	4.9e-20
GO:0043043	peptide biosynthetic process	560	45	9.06	9.2e-20
GO:0043604	amide biosynthetic process	584	45	9.44	4.9e-19
GO:0043603	cellular amide metabolic process	616	46	9.96	6.4e-19
GO:1901566	organonitrogen compound biosynthetic process	964	53	15.59	5.6e-16
GO:0044267	cellular protein metabolic process	2502	89	40.46	2.2e-15
GO:0019538	protein metabolic process	2940	94	47.55	2e-13
GO:0044260	cellular macromolecule metabolic process	4345	119	70.27	3.6e-13
GO:0034645	cellular macromolecule biosynthetic process	2016	74	32.6	5.1e-13
GO:0009059	macromolecule biosynthetic process	2017	74	32.62	5.2e-13
GO:0044271	cellular nitrogen compound biosynthetic process	2076	75	33.57	7.4e-13
GO:0044249	cellular biosynthetic process	2667	86	43.13	3.3e-12
GO:0010467	gene expression	2058	73	33.28	4.6e-12
GO:1901576	organic substance biosynthetic process	2696	86	43.6	6.2e-12
GO:0043170	macromolecule metabolic process	4814	124	77.85	6.9e-12
GO:1901564	organonitrogen compound metabolic process	1315	55	21.27	1.3e-11
GO:0009987	cellular process	7770	164	125.66	8.8e-11
GO:0009058	biosynthetic process	2872	86	46.45	2.1e-10
GO:0044237	cellular metabolic process	5747	132	92.94	4.7e-09
GO:0034641	cellular nitrogen compound metabolic process	2857	81	46.2	1.6e-08
GO:0006807	nitrogen compound metabolic process	3138	85	50.75	5.1e-08
GO:0044238	primary metabolic process	6435	137	104.07	4.6e-07
GO:0071704	organic substance metabolic process	6699	138	108.34	4.4e-06
GO:0009719	response to endogenous stimulus	46	4	0.74	0.0064
GO:0009725	response to hormone	46	4	0.74	0.0064
GO:0010033	response to organic substance	46	4	0.74	0.0064
GO:0044265	cellular macromolecule catabolic process	165	7	2.67	0.0177
GO:0007264	small GTPase mediated signal transduction	134	6	2.17	0.0216
GO:0043933	macromolecular complex subunit organization	214	8	3.46	0.023
GO:0051130	positive regulation of cellular component organization	15	2	0.24	0.0238
GO:0070925	organelle assembly	15	2	0.24	0.0238
GO:0009057	macromolecule catabolic process	221	8	3.57	0.0272
GO:0044257	cellular protein catabolic process	150	6	2.43	0.0349
GO:0051603	proteolysis involved in cellular protein catabolic process	150	6	2.43	0.0349
GO:1902589	single-organism organelle organization	116	5	1.88	0.04
GO:0016567	protein ubiquitination	122	5	1.97	0.0479
GO:0042221	response to chemical	123	5	1.99	0.0493
GO:0034613	cellular protein localization	295	9	4.77	0.0504
GO:0070727	cellular macromolecule localization	295	9	4.77	0.0504
GO:0006464	cellular protein modification process	1808	38	29.24	0.0504
GO:0036211	protein modification process	1808	38	29.24	0.0504
GO:0032446	protein modification by small protein conjugation	127	5	2.05	0.0551
GO:0006511	ubiquitin-dependent protein catabolic process	129	5	2.09	0.0582
GO:0019941	modification-dependent protein catabolic process	129	5	2.09	0.0582
GO:0043632	modification-dependent macromolecule catabolic process	129	5	2.09	0.0582
GO:0070647	protein modification by small protein conjugation or removal	129	5	2.09	0.0582
GO:0044248	cellular catabolic process	261	8	4.22	0.0616
GO:0006468	protein phosphorylation	1394	30	22.54	0.0618
GO:0030163	protein catabolic process	175	6	2.83	0.0647
GO:0016053	organic acid biosynthetic process	265	8	4.29	0.0661
GO:0046394	carboxylic acid biosynthetic process	265	8	4.29	0.0661
GO:0044283	small molecule biosynthetic process	312	9	5.05	0.0668
GO:0007010	cytoskeleton organization	58	3	0.94	0.0673
GO:0008104	protein localization	363	10	5.87	0.0705
GO:0006633	fatty acid biosynthetic process	97	4	1.57	0.0722
GO:0000226	microtubule cytoskeleton organization	28	2	0.45	0.0748
GO:0043412	macromolecule modification	1871	38	30.26	0.0766
GO:0006886	intracellular protein transport	274	8	4.43	0.0769
GO:0051641	cellular localization	424	11	6.86	0.0831
GO:0006414	translational elongation	31	2	0.5	0.0891
GO:0034654	nucleobase-containing compound biosynthetic process	1390	29	22.48	0.0894
GO:0006996	organelle organization	237	7	3.83	0.0902
GO:0065008	regulation of biological quality	192	6	3.11	0.0915
GO:0033036	macromolecule localization	432	11	6.99	0.0918
GO:0065003	macromolecular complex assembly	148	5	2.39	0.0921
GO:0019438	aromatic compound biosynthetic process	1506	31	24.36	0.0921
GO:0065007	biological regulation	1905	38	30.81	0.0942
GO:0072330	monocarboxylic acid biosynthetic process	107	4	1.73	0.0953
GO:0006631	fatty acid metabolic process	108	4	1.75	0.0978
GO:0051128	regulation of cellular component organization	33	2	0.53	0.0992
GO:0006351	transcription, DNA-templated	1239	26	20.04	0.0995
GO:0097659	nucleic acid-templated transcription	1239	26	20.04	0.0995
GO:0032774	RNA biosynthetic process	1241	26	20.07	0.1009
GO:0050789	regulation of biological process	1862	37	30.11	0.1023
GO:0015031	protein transport	342	9	5.53	0.1034
GO:0009067	aspartate family amino acid biosynthetic process	34	2	0.55	0.1043
GO:0071822	protein complex subunit organization	154	5	2.49	0.1046
GO:0018130	heterocycle biosynthetic process	1530	31	24.74	0.1075
GO:0016310	phosphorylation	1531	31	24.76	0.1082
GO:0050794	regulation of cellular process	1815	36	29.35	0.1084
GO:0048522	positive regulation of cellular process	35	2	0.57	0.1095
GO:0048518	positive regulation of biological process	36	2	0.58	0.1147
GO:0051649	establishment of localization in cell	401	10	6.48	0.1158
GO:0046907	intracellular transport	351	9	5.68	0.1162
GO:0035556	intracellular signal transduction	253	7	4.09	0.1164
GO:0045184	establishment of protein localization	352	9	5.69	0.1177
GO:0006913	nucleocytoplasmic transport	74	3	1.2	0.1178
GO:0051169	nuclear transport	74	3	1.2	0.1178
GO:0009066	aspartate family amino acid metabolic process	38	2	0.61	0.1254
GO:0016569	covalent chromatin modification	38	2	0.61	0.1254
GO:0016570	histone modification	38	2	0.61	0.1254
GO:1901362	organic cyclic compound biosynthetic process	1566	31	25.33	0.1335
GO:0006164	purine nucleotide biosynthetic process	82	3	1.33	0.1471
GO:0006417	regulation of translation	10	1	0.16	0.1505
GO:0010608	posttranscriptional regulation of gene expression	10	1	0.16	0.1505
GO:0031347	regulation of defense response	10	1	0.16	0.1505
GO:0034248	regulation of cellular amide metabolic process	10	1	0.16	0.1505
GO:0006325	chromatin organization	83	3	1.34	0.1509
GO:0016568	chromatin modification	43	2	0.7	0.1531
GO:0045454	cell redox homeostasis	129	4	2.09	0.1564
GO:0006074	(1->3)-beta-D-glucan metabolic process	11	1	0.18	0.1642
GO:0006075	(1->3)-beta-D-glucan biosynthetic process	11	1	0.18	0.1642
GO:0010638	positive regulation of organelle organization	11	1	0.18	0.1642
GO:0030838	positive regulation of actin filament polymerization	11	1	0.18	0.1642
GO:0031334	positive regulation of protein complex assembly	11	1	0.18	0.1642
GO:0032273	positive regulation of protein polymerization	11	1	0.18	0.1642
GO:0032507	maintenance of protein location in cell	11	1	0.18	0.1642
GO:0034314	Arp2/3 complex-mediated actin nucleation	11	1	0.18	0.1642
GO:0044089	positive regulation of cellular component biogenesis	11	1	0.18	0.1642
GO:0045010	actin nucleation	11	1	0.18	0.1642
GO:0045185	maintenance of protein location	11	1	0.18	0.1642
GO:0051220	cytoplasmic sequestering of protein	11	1	0.18	0.1642
GO:0051235	maintenance of location	11	1	0.18	0.1642
GO:0051495	positive regulation of cytoskeleton organization	11	1	0.18	0.1642
GO:0051651	maintenance of location in cell	11	1	0.18	0.1642
GO:0080134	regulation of response to stress	11	1	0.18	0.1642
GO:0034622	cellular macromolecular complex assembly	132	4	2.13	0.1656
GO:0006461	protein complex assembly	133	4	2.15	0.1688
GO:0070271	protein complex biogenesis	133	4	2.15	0.1688
GO:1901607	alpha-amino acid biosynthetic process	134	4	2.17	0.1719
GO:0071702	organic substance transport	492	11	7.96	0.1738
GO:0006465	signal peptide processing	12	1	0.19	0.1778
GO:0006525	arginine metabolic process	12	1	0.19	0.1778
GO:0009086	methionine biosynthetic process	12	1	0.19	0.1778
GO:0070887	cellular response to chemical stimulus	12	1	0.19	0.1778
GO:1901617	organic hydroxy compound biosynthetic process	12	1	0.19	0.1778
GO:0006754	ATP biosynthetic process	48	2	0.78	0.1819
GO:0016070	RNA metabolic process	1571	30	25.41	0.1876
GO:0019725	cellular homeostasis	139	4	2.25	0.188
GO:0000105	histidine biosynthetic process	13	1	0.21	0.1911
GO:0006547	histidine metabolic process	13	1	0.21	0.1911
GO:0052803	imidazole-containing compound metabolic process	13	1	0.21	0.1911
GO:0009889	regulation of biosynthetic process	1120	22	18.11	0.1965
GO:0010556	regulation of macromolecule biosynthetic process	1120	22	18.11	0.1965
GO:0031326	regulation of cellular biosynthetic process	1120	22	18.11	0.1965
GO:2000112	regulation of cellular macromolecule biosynthetic process	1120	22	18.11	0.1965
GO:0006796	phosphate-containing compound metabolic process	1930	36	31.21	0.1967
GO:0006793	phosphorus metabolic process	1932	36	31.24	0.1985
GO:0006555	methionine metabolic process	14	1	0.23	0.2042
GO:0008064	regulation of actin polymerization or depolymerization	14	1	0.23	0.2042
GO:0016998	cell wall macromolecule catabolic process	14	1	0.23	0.2042
GO:0022618	ribonucleoprotein complex assembly	14	1	0.23	0.2042
GO:0030041	actin filament polymerization	14	1	0.23	0.2042
GO:0030832	regulation of actin filament length	14	1	0.23	0.2042
GO:0030833	regulation of actin filament polymerization	14	1	0.23	0.2042
GO:0032271	regulation of protein polymerization	14	1	0.23	0.2042
GO:0032956	regulation of actin cytoskeleton organization	14	1	0.23	0.2042
GO:0032970	regulation of actin filament-based process	14	1	0.23	0.2042
GO:0043254	regulation of protein complex assembly	14	1	0.23	0.2042
GO:0044036	cell wall macromolecule metabolic process	14	1	0.23	0.2042
GO:0051493	regulation of cytoskeleton organization	14	1	0.23	0.2042
GO:0071826	ribonucleoprotein complex subunit organization	14	1	0.23	0.2042
GO:0051171	regulation of nitrogen compound metabolic process	1128	22	18.24	0.2058
GO:0072522	purine-containing compound biosynthetic process	97	3	1.57	0.2072
GO:0022607	cellular component assembly	195	5	3.15	0.2086
GO:0010468	regulation of gene expression	1131	22	18.29	0.2094
GO:0015914	phospholipid transport	15	1	0.24	0.2171
GO:0006352	DNA-templated transcription, initiation	54	2	0.87	0.2172
GO:0009142	nucleoside triphosphate biosynthetic process	55	2	0.89	0.2232
GO:0009145	purine nucleoside triphosphate biosynthetic process	55	2	0.89	0.2232
GO:0009201	ribonucleoside triphosphate biosynthetic process	55	2	0.89	0.2232
GO:0009206	purine ribonucleoside triphosphate biosynthetic process	55	2	0.89	0.2232
GO:0006553	lysine metabolic process	16	1	0.26	0.2297
GO:0007015	actin filament organization	16	1	0.26	0.2297
GO:0008154	actin polymerization or depolymerization	16	1	0.26	0.2297
GO:0009085	lysine biosynthetic process	16	1	0.26	0.2297
GO:0009089	lysine biosynthetic process via diaminopimelate	16	1	0.26	0.2297
GO:0032535	regulation of cellular component size	16	1	0.26	0.2297
GO:0046451	diaminopimelate metabolic process	16	1	0.26	0.2297
GO:0090066	regulation of anatomical structure size	16	1	0.26	0.2297
GO:0031323	regulation of cellular metabolic process	1149	22	18.58	0.2313
GO:0080090	regulation of primary metabolic process	1152	22	18.63	0.235
GO:0042592	homeostatic process	153	4	2.47	0.2353
GO:0006415	translational termination	17	1	0.27	0.2422
GO:0030029	actin filament-based process	17	1	0.27	0.2422
GO:0030036	actin cytoskeleton organization	17	1	0.27	0.2422
GO:0044087	regulation of cellular component biogenesis	17	1	0.27	0.2422
GO:1901700	response to oxygen-containing compound	17	1	0.27	0.2422
GO:0006355	regulation of transcription, DNA-templated	1104	21	17.85	0.2476
GO:1903506	regulation of nucleic acid-templated transcription	1104	21	17.85	0.2476
GO:2001141	regulation of RNA biosynthetic process	1104	21	17.85	0.2476
GO:0051252	regulation of RNA metabolic process	1107	21	17.9	0.2516
GO:0008652	cellular amino acid biosynthetic process	158	4	2.56	0.2528
GO:0022406	membrane docking	18	1	0.29	0.2545
GO:0048278	vesicle docking	18	1	0.29	0.2545
GO:0060255	regulation of macromolecule metabolic process	1169	22	18.91	0.2568
GO:0006418	tRNA aminoacylation for protein translation	62	2	1	0.2652
GO:0009127	purine nucleoside monophosphate biosynthetic process	62	2	1	0.2652
GO:0009168	purine ribonucleoside monophosphate biosynthetic process	62	2	1	0.2652
GO:0019219	regulation of nucleobase-containing compound metabolic process	1118	21	18.08	0.2663
GO:0006026	aminoglycan catabolic process	19	1	0.31	0.2666
GO:0006030	chitin metabolic process	19	1	0.31	0.2666
GO:0006032	chitin catabolic process	19	1	0.31	0.2666
GO:0015748	organophosphate ester transport	19	1	0.31	0.2666
GO:0046348	amino sugar catabolic process	19	1	0.31	0.2666
GO:0072525	pyridine-containing compound biosynthetic process	19	1	0.31	0.2666
GO:1901071	glucosamine-containing compound metabolic process	19	1	0.31	0.2666
GO:1901072	glucosamine-containing compound catabolic process	19	1	0.31	0.2666
GO:0019222	regulation of metabolic process	1178	22	19.05	0.2686
GO:0043038	amino acid activation	63	2	1.02	0.2712
GO:0043039	tRNA aminoacylation	63	2	1.02	0.2712
GO:0006040	amino sugar metabolic process	20	1	0.32	0.2785
GO:0016485	protein processing	20	1	0.32	0.2785
GO:0033043	regulation of organelle organization	20	1	0.32	0.2785
GO:0034655	nucleobase-containing compound catabolic process	20	1	0.32	0.2785
GO:0051604	protein maturation	20	1	0.32	0.2785
GO:1901575	organic substance catabolic process	386	8	6.24	0.2872
GO:0015711	organic anion transport	66	2	1.07	0.2892
GO:0007275	multicellular organism development	21	1	0.34	0.2901
GO:0044707	single-multicellular organism process	21	1	0.34	0.2901
GO:0008152	metabolic process	8732	145	141.21	0.2915
GO:0009056	catabolic process	389	8	6.29	0.2943
GO:0006508	proteolysis	560	11	9.06	0.2969
GO:0016192	vesicle-mediated transport	225	5	3.64	0.2997
GO:0009891	positive regulation of biosynthetic process	22	1	0.36	0.3016
GO:0010557	positive regulation of macromolecule biosynthetic process	22	1	0.36	0.3016
GO:0010604	positive regulation of macromolecule metabolic process	22	1	0.36	0.3016
GO:0010628	positive regulation of gene expression	22	1	0.36	0.3016
GO:0031328	positive regulation of cellular biosynthetic process	22	1	0.36	0.3016
GO:0043624	cellular protein complex disassembly	22	1	0.36	0.3016
GO:0051173	positive regulation of nitrogen compound metabolic process	22	1	0.36	0.3016
GO:0051276	chromosome organization	120	3	1.94	0.307
GO:0031325	positive regulation of cellular metabolic process	23	1	0.37	0.313
GO:0009156	ribonucleoside monophosphate biosynthetic process	70	2	1.13	0.3132
GO:0042451	purine nucleoside biosynthetic process	70	2	1.13	0.3132
GO:0046129	purine ribonucleoside biosynthetic process	70	2	1.13	0.3132
GO:0006022	aminoglycan metabolic process	24	1	0.39	0.3241
GO:0009893	positive regulation of metabolic process	24	1	0.39	0.3241
GO:0022411	cellular component disassembly	24	1	0.39	0.3241
GO:0032984	macromolecular complex disassembly	24	1	0.39	0.3241
GO:0043241	protein complex disassembly	24	1	0.39	0.3241
GO:0009124	nucleoside monophosphate biosynthetic process	72	2	1.16	0.3251
GO:0090304	nucleic acid metabolic process	1817	32	29.38	0.3276
GO:0009165	nucleotide biosynthetic process	125	3	2.02	0.3292
GO:1901293	nucleoside phosphate biosynthetic process	125	3	2.02	0.3292
GO:0006260	DNA replication	74	2	1.2	0.337
GO:0009152	purine ribonucleotide biosynthetic process	75	2	1.21	0.3429
GO:0090407	organophosphate biosynthetic process	184	4	2.98	0.3472
GO:0000097	sulfur amino acid biosynthetic process	27	1	0.44	0.3564
GO:0009084	glutamine family amino acid biosynthetic process	27	1	0.44	0.3564
GO:0032502	developmental process	27	1	0.44	0.3564
GO:0044767	single-organism developmental process	27	1	0.44	0.3564
GO:0009163	nucleoside biosynthetic process	78	2	1.26	0.3605
GO:0042455	ribonucleoside biosynthetic process	78	2	1.26	0.3605
GO:1901659	glycosyl compound biosynthetic process	78	2	1.26	0.3605
GO:0043623	cellular protein complex assembly	79	2	1.28	0.3663
GO:0003333	amino acid transmembrane transport	28	1	0.45	0.3669
GO:0006865	amino acid transport	28	1	0.45	0.3669
GO:0098656	anion transmembrane transport	28	1	0.45	0.3669
GO:1903825	organic acid transmembrane transport	28	1	0.45	0.3669
GO:0016482	cytoplasmic transport	134	3	2.17	0.369
GO:0009260	ribonucleotide biosynthetic process	80	2	1.29	0.3722
GO:0046390	ribose phosphate biosynthetic process	80	2	1.29	0.3722
GO:0006310	DNA recombination	29	1	0.47	0.3771
GO:0032268	regulation of cellular protein metabolic process	29	1	0.47	0.3771
GO:1901605	alpha-amino acid metabolic process	193	4	3.12	0.3803
GO:0032787	monocarboxylic acid metabolic process	194	4	3.14	0.384
GO:0044711	single-organism biosynthetic process	726	13	11.74	0.3931
GO:0044270	cellular nitrogen compound catabolic process	31	1	0.5	0.3972
GO:0046700	heterocycle catabolic process	31	1	0.5	0.3972
GO:1901136	carbohydrate derivative catabolic process	31	1	0.5	0.3972
GO:0009110	vitamin biosynthetic process	32	1	0.52	0.4069
GO:0042364	water-soluble vitamin biosynthetic process	32	1	0.52	0.4069
GO:0007049	cell cycle	87	2	1.41	0.4122
GO:0000096	sulfur amino acid metabolic process	33	1	0.53	0.4165
GO:0044085	cellular component biogenesis	263	5	4.25	0.4214
GO:0006766	vitamin metabolic process	34	1	0.55	0.426
GO:0006767	water-soluble vitamin metabolic process	34	1	0.55	0.426
GO:0016043	cellular component organization	505	9	8.17	0.4314
GO:0048583	regulation of response to stimulus	92	2	1.49	0.4401
GO:0006520	cellular amino acid metabolic process	329	6	5.32	0.4413
GO:0051246	regulation of protein metabolic process	36	1	0.58	0.4445
GO:0006081	cellular aldehyde metabolic process	37	1	0.6	0.4535
GO:0015985	energy coupled proton transport, down electrochemical gradient	37	1	0.6	0.4535
GO:0015986	ATP synthesis coupled proton transport	37	1	0.6	0.4535
GO:0007165	signal transduction	516	9	8.34	0.4569
GO:0023052	signaling	516	9	8.34	0.4569
GO:0044700	single organism signaling	516	9	8.34	0.4569
GO:0019752	carboxylic acid metabolic process	578	10	9.35	0.4597
GO:0006334	nucleosome assembly	38	1	0.61	0.4624
GO:0031497	chromatin assembly	38	1	0.61	0.4624
GO:0034728	nucleosome organization	38	1	0.61	0.4624
GO:0043436	oxoacid metabolic process	586	10	9.48	0.4772
GO:0006082	organic acid metabolic process	587	10	9.49	0.4794
GO:0006323	DNA packaging	40	1	0.65	0.4797
GO:0006333	chromatin assembly or disassembly	40	1	0.65	0.4797
GO:0065004	protein-DNA complex assembly	40	1	0.65	0.4797
GO:0071824	protein-DNA complex subunit organization	40	1	0.65	0.4797
GO:0009064	glutamine family amino acid metabolic process	41	1	0.66	0.4881
GO:0000413	protein peptidyl-prolyl isomerization	43	1	0.7	0.5046
GO:0018208	peptidyl-proline modification	43	1	0.7	0.5046
GO:0007017	microtubule-based process	166	3	2.68	0.5052
GO:0008610	lipid biosynthetic process	231	4	3.74	0.516
GO:1901615	organic hydroxy compound metabolic process	45	1	0.73	0.5205
GO:0006139	nucleobase-containing compound metabolic process	2166	35	35.03	0.5322
GO:0006887	exocytosis	47	1	0.76	0.536
GO:0051258	protein polymerization	47	1	0.76	0.536
GO:0032940	secretion by cell	50	1	0.81	0.5582
GO:0046903	secretion	50	1	0.81	0.5582
GO:0015849	organic acid transport	51	1	0.82	0.5654
GO:0046942	carboxylic acid transport	51	1	0.82	0.5654
GO:0051273	beta-glucan metabolic process	52	1	0.84	0.5725
GO:0051274	beta-glucan biosynthetic process	52	1	0.84	0.5725
GO:0046483	heterocycle metabolic process	2325	37	37.6	0.5734
GO:0006457	protein folding	184	3	2.98	0.5749
GO:0071103	DNA conformation change	53	1	0.86	0.5794
GO:0006399	tRNA metabolic process	120	2	1.94	0.5812
GO:0071840	cellular component organization or biogenesis	573	9	9.27	0.5843
GO:0043648	dicarboxylic acid metabolic process	55	1	0.89	0.593
GO:1901565	organonitrogen compound catabolic process	56	1	0.91	0.5996
GO:0006725	cellular aromatic compound metabolic process	2353	37	38.05	0.6056
GO:0006820	anion transport	126	2	2.04	0.6078
GO:0006163	purine nucleotide metabolic process	194	3	3.14	0.6109
GO:0006813	potassium ion transport	59	1	0.95	0.6188
GO:0022402	cell cycle process	59	1	0.95	0.6188
GO:0051716	cellular response to stimulus	657	10	10.63	0.6245
GO:0006855	drug transmembrane transport	60	1	0.97	0.625
GO:0015893	drug transport	60	1	0.97	0.625
GO:0042493	response to drug	60	1	0.97	0.625
GO:0051179	localization	1807	28	29.22	0.6291
GO:0050896	response to stimulus	1049	16	16.96	0.6353
GO:0006869	lipid transport	64	1	1.04	0.6488
GO:0006952	defense response	64	1	1.04	0.6488
GO:0010876	lipid localization	64	1	1.04	0.6488
GO:0044272	sulfur compound biosynthetic process	64	1	1.04	0.6488
GO:1901360	organic cyclic compound metabolic process	2395	37	38.73	0.6521
GO:0042254	ribosome biogenesis	65	1	1.05	0.6545
GO:1902600	hydrogen ion transmembrane transport	65	1	1.05	0.6545
GO:0019439	aromatic compound catabolic process	66	1	1.07	0.6601
GO:1901361	organic cyclic compound catabolic process	66	1	1.07	0.6601
GO:0072521	purine-containing compound metabolic process	211	3	3.41	0.6673
GO:0007154	cell communication	619	9	10.01	0.6764
GO:0006810	transport	1784	27	28.85	0.6778
GO:0046034	ATP metabolic process	145	2	2.34	0.6837
GO:0000271	polysaccharide biosynthetic process	71	1	1.15	0.6869
GO:0009250	glucan biosynthetic process	71	1	1.15	0.6869
GO:0033692	cellular polysaccharide biosynthetic process	71	1	1.15	0.6869
GO:0051234	establishment of localization	1794	27	29.01	0.6894
GO:0006818	hydrogen transport	74	1	1.2	0.7019
GO:0015992	proton transport	74	1	1.2	0.7019
GO:0022613	ribonucleoprotein complex biogenesis	74	1	1.2	0.7019
GO:0034660	ncRNA metabolic process	151	2	2.44	0.7051
GO:0009108	coenzyme biosynthetic process	75	1	1.21	0.7068
GO:0009144	purine nucleoside triphosphate metabolic process	152	2	2.46	0.7085
GO:0009199	ribonucleoside triphosphate metabolic process	152	2	2.46	0.7085
GO:0009205	purine ribonucleoside triphosphate metabolic process	152	2	2.46	0.7085
GO:0016071	mRNA metabolic process	76	1	1.23	0.7115
GO:0044281	small molecule metabolic process	973	14	15.74	0.7156
GO:0071705	nitrogen compound transport	77	1	1.25	0.7162
GO:0009141	nucleoside triphosphate metabolic process	156	2	2.52	0.7219
GO:0009966	regulation of signal transduction	79	1	1.28	0.7254
GO:0010646	regulation of cell communication	79	1	1.28	0.7254
GO:0018193	peptidyl-amino acid modification	79	1	1.28	0.7254
GO:0023051	regulation of signaling	79	1	1.28	0.7254
GO:0009126	purine nucleoside monophosphate metabolic process	159	2	2.57	0.7317
GO:0009167	purine ribonucleoside monophosphate metabolic process	159	2	2.57	0.7317
GO:0015672	monovalent inorganic cation transport	161	2	2.6	0.738
GO:0044255	cellular lipid metabolic process	309	4	5	0.7406
GO:0000160	phosphorelay signal transduction system	85	1	1.37	0.7512
GO:0006470	protein dephosphorylation	85	1	1.37	0.7512
GO:0009161	ribonucleoside monophosphate metabolic process	167	2	2.7	0.7562
GO:0009123	nucleoside monophosphate metabolic process	169	2	2.73	0.762
GO:0007018	microtubule-based movement	90	1	1.46	0.7708
GO:0006790	sulfur compound metabolic process	92	1	1.49	0.7782
GO:0006928	movement of cell or subcellular component	93	1	1.5	0.7818
GO:0034220	ion transmembrane transport	177	2	2.86	0.7841
GO:0042278	purine nucleoside metabolic process	178	2	2.88	0.7868
GO:0046128	purine ribonucleoside metabolic process	178	2	2.88	0.7868
GO:0009150	purine ribonucleotide metabolic process	183	2	2.96	0.7995
GO:0009117	nucleotide metabolic process	262	3	4.24	0.8003
GO:0034637	cellular carbohydrate biosynthetic process	99	1	1.6	0.8023
GO:0006753	nucleoside phosphate metabolic process	267	3	4.32	0.8105
GO:0030001	metal ion transport	267	3	4.32	0.8105
GO:0009119	ribonucleoside metabolic process	188	2	3.04	0.8116
GO:0009259	ribonucleotide metabolic process	188	2	3.04	0.8116
GO:0006073	cellular glucan metabolic process	102	1	1.65	0.8118
GO:0044042	glucan metabolic process	102	1	1.65	0.8118
GO:0044264	cellular polysaccharide metabolic process	102	1	1.65	0.8118
GO:1901137	carbohydrate derivative biosynthetic process	189	2	3.06	0.8139
GO:0051188	cofactor biosynthetic process	106	1	1.71	0.8238
GO:0072524	pyridine-containing compound metabolic process	107	1	1.73	0.8267
GO:0016051	carbohydrate biosynthetic process	108	1	1.75	0.8295
GO:0005976	polysaccharide metabolic process	114	1	1.84	0.8455
GO:0016311	dephosphorylation	116	1	1.88	0.8505
GO:0009116	nucleoside metabolic process	207	2	3.35	0.8518
GO:1901657	glycosyl compound metabolic process	207	2	3.35	0.8518
GO:0032501	multicellular organismal process	118	1	1.91	0.8554
GO:0019693	ribose phosphate metabolic process	210	2	3.4	0.8574
GO:0055086	nucleobase-containing small molecule metabolic process	307	3	4.96	0.8778
GO:0055085	transmembrane transport	772	9	12.48	0.8846
GO:0006281	DNA repair	134	1	2.17	0.8889
GO:0006974	cellular response to DNA damage stimulus	136	1	2.2	0.8925
GO:0006811	ion transport	559	6	9.04	0.8945
GO:0071554	cell wall organization or biogenesis	138	1	2.23	0.896
GO:0033554	cellular response to stress	139	1	2.25	0.8977
GO:0019637	organophosphate metabolic process	415	4	6.71	0.9078
GO:0006812	cation transport	420	4	6.79	0.9125
GO:0098655	cation transmembrane transport	149	1	2.41	0.9133
GO:0098660	inorganic ion transmembrane transport	149	1	2.41	0.9133
GO:0098662	inorganic cation transmembrane transport	149	1	2.41	0.9133
GO:0044763	single-organism cellular process	3394	47	54.89	0.9142
GO:0006629	lipid metabolic process	509	5	8.23	0.9193
GO:0006259	DNA metabolic process	255	2	4.12	0.921
GO:0044262	cellular carbohydrate metabolic process	165	1	2.67	0.9334
GO:0006732	coenzyme metabolic process	176	1	2.85	0.9445
GO:1901135	carbohydrate derivative metabolic process	386	3	6.24	0.9519
GO:1902578	single-organism localization	1261	14	20.39	0.9546
GO:0044765	single-organism transport	1238	13	20.02	0.9697
GO:0006950	response to stress	425	3	6.87	0.9705
GO:0051186	cofactor metabolic process	215	1	3.48	0.9709
GO:0006396	RNA processing	235	1	3.8	0.9792
GO:0044723	single-organism carbohydrate metabolic process	325	1	5.26	0.9954
GO:0005975	carbohydrate metabolic process	831	3	13.44	0.9999
GO:0044699	single-organism process	5184	58	83.84	1
GO:0044710	single-organism metabolic process	2946	25	47.64	1
GO:0055114	oxidation-reduction process	1496	7	24.19	1
GO:0008150	biological_process	11625	188	188	1
GO:0000003	reproduction	110	0	1.78	1
GO:0000041	transition metal ion transport	22	0	0.36	1
GO:0000079	regulation of cyclin-dependent protein serine/threonine kinase activity	14	0	0.23	1
GO:0000272	polysaccharide catabolic process	12	0	0.19	1
GO:0000278	mitotic cell cycle	23	0	0.37	1
GO:0000280	nuclear division	19	0	0.31	1
GO:0000375	RNA splicing, via transesterification reactions	25	0	0.4	1
GO:0000377	RNA splicing, via transesterification reactions with bulged adenosine as nucleophile	25	0	0.4	1
GO:0000398	mRNA splicing, via spliceosome	25	0	0.4	1
GO:0000910	cytokinesis	22	0	0.36	1
GO:0001101	response to acid chemical	10	0	0.16	1
GO:0001510	RNA methylation	13	0	0.21	1
GO:0001522	pseudouridine synthesis	22	0	0.36	1
GO:0001932	regulation of protein phosphorylation	15	0	0.24	1
GO:0005977	glycogen metabolic process	12	0	0.19	1
GO:0005978	glycogen biosynthetic process	12	0	0.19	1
GO:0005984	disaccharide metabolic process	43	0	0.7	1
GO:0005985	sucrose metabolic process	18	0	0.29	1
GO:0005991	trehalose metabolic process	25	0	0.4	1
GO:0005992	trehalose biosynthetic process	23	0	0.37	1
GO:0005996	monosaccharide metabolic process	59	0	0.95	1
GO:0006006	glucose metabolic process	22	0	0.36	1
GO:0006012	galactose metabolic process	11	0	0.18	1
GO:0006066	alcohol metabolic process	37	0	0.6	1
GO:0006090	pyruvate metabolic process	70	0	1.13	1
GO:0006091	generation of precursor metabolites and energy	177	0	2.86	1
GO:0006096	glycolytic process	66	0	1.07	1
GO:0006098	pentose-phosphate shunt	22	0	0.36	1
GO:0006099	tricarboxylic acid cycle	21	0	0.34	1
GO:0006101	citrate metabolic process	21	0	0.34	1
GO:0006108	malate metabolic process	23	0	0.37	1
GO:0006112	energy reserve metabolic process	12	0	0.19	1
GO:0006119	oxidative phosphorylation	27	0	0.44	1
GO:0006122	mitochondrial electron transport, ubiquinol to cytochrome c	10	0	0.16	1
GO:0006165	nucleoside diphosphate phosphorylation	73	0	1.18	1
GO:0006188	IMP biosynthetic process	13	0	0.21	1
GO:0006206	pyrimidine nucleobase metabolic process	14	0	0.23	1
GO:0006207	'de novo' pyrimidine nucleobase biosynthetic process	12	0	0.19	1
GO:0006213	pyrimidine nucleoside metabolic process	14	0	0.23	1
GO:0006220	pyrimidine nucleotide metabolic process	31	0	0.5	1
GO:0006221	pyrimidine nucleotide biosynthetic process	29	0	0.47	1
GO:0006261	DNA-dependent DNA replication	16	0	0.26	1
GO:0006265	DNA topological change	13	0	0.21	1
GO:0006284	base-excision repair	24	0	0.39	1
GO:0006289	nucleotide-excision repair	16	0	0.26	1
GO:0006298	mismatch repair	12	0	0.19	1
GO:0006354	DNA-templated transcription, elongation	13	0	0.21	1
GO:0006357	regulation of transcription from RNA polymerase II promoter	32	0	0.52	1
GO:0006364	rRNA processing	37	0	0.6	1
GO:0006366	transcription from RNA polymerase II promoter	48	0	0.78	1
GO:0006367	transcription initiation from RNA polymerase II promoter	16	0	0.26	1
GO:0006397	mRNA processing	66	0	1.07	1
GO:0006400	tRNA modification	21	0	0.34	1
GO:0006413	translational initiation	34	0	0.55	1
GO:0006479	protein methylation	34	0	0.55	1
GO:0006486	protein glycosylation	59	0	0.95	1
GO:0006487	protein N-linked glycosylation	11	0	0.18	1
GO:0006497	protein lipidation	19	0	0.31	1
GO:0006505	GPI anchor metabolic process	20	0	0.32	1
GO:0006506	GPI anchor biosynthetic process	17	0	0.27	1
GO:0006534	cysteine metabolic process	17	0	0.27	1
GO:0006535	cysteine biosynthetic process from serine	14	0	0.23	1
GO:0006536	glutamate metabolic process	12	0	0.19	1
GO:0006541	glutamine metabolic process	14	0	0.23	1
GO:0006544	glycine metabolic process	19	0	0.31	1
GO:0006558	L-phenylalanine metabolic process	11	0	0.18	1
GO:0006563	L-serine metabolic process	31	0	0.5	1
GO:0006568	tryptophan metabolic process	17	0	0.27	1
GO:0006575	cellular modified amino acid metabolic process	47	0	0.76	1
GO:0006576	cellular biogenic amine metabolic process	46	0	0.74	1
GO:0006586	indolalkylamine metabolic process	17	0	0.27	1
GO:0006595	polyamine metabolic process	13	0	0.21	1
GO:0006596	polyamine biosynthetic process	10	0	0.16	1
GO:0006605	protein targeting	41	0	0.66	1
GO:0006606	protein import into nucleus	10	0	0.16	1
GO:0006612	protein targeting to membrane	17	0	0.27	1
GO:0006613	cotranslational protein targeting to membrane	17	0	0.27	1
GO:0006614	SRP-dependent cotranslational protein targeting to membrane	17	0	0.27	1
GO:0006643	membrane lipid metabolic process	38	0	0.61	1
GO:0006644	phospholipid metabolic process	118	0	1.91	1
GO:0006650	glycerophospholipid metabolic process	92	0	1.49	1
GO:0006661	phosphatidylinositol biosynthetic process	18	0	0.29	1
GO:0006662	glycerol ether metabolic process	14	0	0.23	1
GO:0006664	glycolipid metabolic process	31	0	0.5	1
GO:0006665	sphingolipid metabolic process	11	0	0.18	1
GO:0006672	ceramide metabolic process	10	0	0.16	1
GO:0006694	steroid biosynthetic process	15	0	0.24	1
GO:0006720	isoprenoid metabolic process	55	0	0.89	1
GO:0006721	terpenoid metabolic process	23	0	0.37	1
GO:0006733	oxidoreduction coenzyme metabolic process	106	0	1.71	1
GO:0006739	NADP metabolic process	26	0	0.42	1
GO:0006749	glutathione metabolic process	14	0	0.23	1
GO:0006757	ATP generation from ADP	66	0	1.07	1
GO:0006760	folic acid-containing compound metabolic process	18	0	0.29	1
GO:0006771	riboflavin metabolic process	16	0	0.26	1
GO:0006778	porphyrin-containing compound metabolic process	35	0	0.57	1
GO:0006779	porphyrin-containing compound biosynthetic process	29	0	0.47	1
GO:0006801	superoxide metabolic process	18	0	0.29	1
GO:0006814	sodium ion transport	11	0	0.18	1
GO:0006816	calcium ion transport	28	0	0.45	1
GO:0006821	chloride transport	11	0	0.18	1
GO:0006835	dicarboxylic acid transport	18	0	0.29	1
GO:0006839	mitochondrial transport	18	0	0.29	1
GO:0006857	oligopeptide transport	15	0	0.24	1
GO:0006888	ER to Golgi vesicle-mediated transport	24	0	0.39	1
GO:0006900	membrane budding	13	0	0.21	1
GO:0006901	vesicle coating	13	0	0.21	1
GO:0006904	vesicle docking involved in exocytosis	16	0	0.26	1
GO:0006979	response to oxidative stress	106	0	1.71	1
GO:0007005	mitochondrion organization	14	0	0.23	1
GO:0007034	vacuolar transport	19	0	0.31	1
GO:0007059	chromosome segregation	11	0	0.18	1
GO:0007067	mitotic nuclear division	14	0	0.23	1
GO:0007186	G-protein coupled receptor signaling pathway	33	0	0.53	1
GO:0008033	tRNA processing	58	0	0.94	1
GO:0008037	cell recognition	97	0	1.57	1
GO:0008202	steroid metabolic process	18	0	0.29	1
GO:0008213	protein alkylation	34	0	0.55	1
GO:0008272	sulfate transport	18	0	0.29	1
GO:0008299	isoprenoid biosynthetic process	55	0	0.89	1
GO:0008380	RNA splicing	33	0	0.53	1
GO:0008643	carbohydrate transport	11	0	0.18	1
GO:0008654	phospholipid biosynthetic process	46	0	0.74	1
GO:0009060	aerobic respiration	27	0	0.44	1
GO:0009063	cellular amino acid catabolic process	24	0	0.39	1
GO:0009069	serine family amino acid metabolic process	44	0	0.71	1
GO:0009070	serine family amino acid biosynthetic process	25	0	0.4	1
GO:0009072	aromatic amino acid family metabolic process	48	0	0.78	1
GO:0009073	aromatic amino acid family biosynthetic process	29	0	0.47	1
GO:0009081	branched-chain amino acid metabolic process	16	0	0.26	1
GO:0009082	branched-chain amino acid biosynthetic process	13	0	0.21	1
GO:0009095	aromatic amino acid family biosynthetic process, prephenate pathway	10	0	0.16	1
GO:0009100	glycoprotein metabolic process	64	0	1.04	1
GO:0009101	glycoprotein biosynthetic process	64	0	1.04	1
GO:0009112	nucleobase metabolic process	23	0	0.37	1
GO:0009132	nucleoside diphosphate metabolic process	76	0	1.23	1
GO:0009135	purine nucleoside diphosphate metabolic process	66	0	1.07	1
GO:0009179	purine ribonucleoside diphosphate metabolic process	66	0	1.07	1
GO:0009185	ribonucleoside diphosphate metabolic process	66	0	1.07	1
GO:0009218	pyrimidine ribonucleotide metabolic process	12	0	0.19	1
GO:0009220	pyrimidine ribonucleotide biosynthetic process	12	0	0.19	1
GO:0009225	nucleotide-sugar metabolic process	11	0	0.18	1
GO:0009231	riboflavin biosynthetic process	16	0	0.26	1
GO:0009247	glycolipid biosynthetic process	24	0	0.39	1
GO:0009266	response to temperature stimulus	16	0	0.26	1
GO:0009308	amine metabolic process	74	0	1.2	1
GO:0009309	amine biosynthetic process	22	0	0.36	1
GO:0009311	oligosaccharide metabolic process	48	0	0.78	1
GO:0009312	oligosaccharide biosynthetic process	30	0	0.49	1
GO:0009396	folic acid-containing compound biosynthetic process	15	0	0.24	1
GO:0009408	response to heat	16	0	0.26	1
GO:0009451	RNA modification	57	0	0.92	1
GO:0009605	response to external stimulus	13	0	0.21	1
GO:0009607	response to biotic stimulus	27	0	0.44	1
GO:0009611	response to wounding	12	0	0.19	1
GO:0009628	response to abiotic stimulus	29	0	0.47	1
GO:0009664	plant-type cell wall organization	42	0	0.68	1
GO:0009698	phenylpropanoid metabolic process	30	0	0.49	1
GO:0009767	photosynthetic electron transport chain	10	0	0.16	1
GO:0009808	lignin metabolic process	30	0	0.49	1
GO:0009832	plant-type cell wall biogenesis	12	0	0.19	1
GO:0009856	pollination	97	0	1.57	1
GO:0009875	pollen-pistil interaction	97	0	1.57	1
GO:0009890	negative regulation of biosynthetic process	13	0	0.21	1
GO:0009892	negative regulation of metabolic process	35	0	0.57	1
GO:0009894	regulation of catabolic process	11	0	0.18	1
GO:0010035	response to inorganic substance	17	0	0.27	1
GO:0010215	cellulose microfibril organization	12	0	0.19	1
GO:0010498	proteasomal protein catabolic process	11	0	0.18	1
GO:0010558	negative regulation of macromolecule biosynthetic process	13	0	0.21	1
GO:0010605	negative regulation of macromolecule metabolic process	35	0	0.57	1
GO:0010629	negative regulation of gene expression	29	0	0.47	1
GO:0015074	DNA integration	21	0	0.34	1
GO:0015693	magnesium ion transport	15	0	0.24	1
GO:0015696	ammonium transport	17	0	0.27	1
GO:0015698	inorganic anion transport	45	0	0.73	1
GO:0015740	C4-dicarboxylate transport	18	0	0.29	1
GO:0015743	malate transport	18	0	0.29	1
GO:0015833	peptide transport	15	0	0.24	1
GO:0015936	coenzyme A metabolic process	12	0	0.19	1
GO:0015979	photosynthesis	101	0	1.63	1
GO:0015980	energy derivation by oxidation of organic compounds	75	0	1.21	1
GO:0015988	energy coupled proton transmembrane transport, against electrochemical gradient	37	0	0.6	1
GO:0015991	ATP hydrolysis coupled proton transport	37	0	0.6	1
GO:0015994	chlorophyll metabolic process	17	0	0.27	1
GO:0015995	chlorophyll biosynthetic process	14	0	0.23	1
GO:0016042	lipid catabolic process	22	0	0.36	1
GO:0016049	cell growth	12	0	0.19	1
GO:0016050	vesicle organization	14	0	0.23	1
GO:0016052	carbohydrate catabolic process	83	0	1.34	1
GO:0016054	organic acid catabolic process	30	0	0.49	1
GO:0016072	rRNA metabolic process	37	0	0.6	1
GO:0016114	terpenoid biosynthetic process	23	0	0.37	1
GO:0016226	iron-sulfur cluster assembly	24	0	0.39	1
GO:0016458	gene silencing	17	0	0.27	1
GO:0016571	histone methylation	18	0	0.29	1
GO:0017038	protein import	19	0	0.31	1
GO:0018022	peptidyl-lysine methylation	19	0	0.31	1
GO:0018205	peptidyl-lysine modification	29	0	0.47	1
GO:0018904	ether metabolic process	14	0	0.23	1
GO:0019220	regulation of phosphate metabolic process	16	0	0.26	1
GO:0019318	hexose metabolic process	49	0	0.79	1
GO:0019321	pentose metabolic process	10	0	0.16	1
GO:0019344	cysteine biosynthetic process	15	0	0.24	1
GO:0019359	nicotinamide nucleotide biosynthetic process	13	0	0.21	1
GO:0019362	pyridine nucleotide metabolic process	101	0	1.63	1
GO:0019363	pyridine nucleotide biosynthetic process	13	0	0.21	1
GO:0019674	NAD metabolic process	13	0	0.21	1
GO:0019682	glyceraldehyde-3-phosphate metabolic process	24	0	0.39	1
GO:0019684	photosynthesis, light reaction	22	0	0.36	1
GO:0019748	secondary metabolic process	33	0	0.53	1
GO:0019751	polyol metabolic process	19	0	0.31	1
GO:0019856	pyrimidine nucleobase biosynthetic process	14	0	0.23	1
GO:0022414	reproductive process	110	0	1.78	1
GO:0022900	electron transport chain	62	0	1	1
GO:0022904	respiratory electron transport chain	36	0	0.58	1
GO:0030198	extracellular matrix organization	12	0	0.19	1
GO:0030243	cellulose metabolic process	41	0	0.66	1
GO:0030244	cellulose biosynthetic process	41	0	0.66	1
GO:0030258	lipid modification	52	0	0.84	1
GO:0030259	lipid glycosylation	11	0	0.18	1
GO:0031047	gene silencing by RNA	17	0	0.27	1
GO:0031123	RNA 3'-end processing	11	0	0.18	1
GO:0031163	metallo-sulfur cluster assembly	24	0	0.39	1
GO:0031324	negative regulation of cellular metabolic process	18	0	0.29	1
GO:0031327	negative regulation of cellular biosynthetic process	13	0	0.21	1
GO:0031399	regulation of protein modification process	19	0	0.31	1
GO:0032259	methylation	70	0	1.13	1
GO:0032784	regulation of DNA-templated transcription, elongation	13	0	0.21	1
GO:0033013	tetrapyrrole metabolic process	46	0	0.74	1
GO:0033014	tetrapyrrole biosynthetic process	40	0	0.65	1
GO:0033365	protein localization to organelle	45	0	0.73	1
GO:0033865	nucleoside bisphosphate metabolic process	17	0	0.27	1
GO:0033875	ribonucleoside bisphosphate metabolic process	17	0	0.27	1
GO:0034032	purine nucleoside bisphosphate metabolic process	17	0	0.27	1
GO:0034470	ncRNA processing	89	0	1.44	1
GO:0034504	protein localization to nucleus	10	0	0.16	1
GO:0034968	histone lysine methylation	18	0	0.29	1
GO:0040007	growth	12	0	0.19	1
GO:0042157	lipoprotein metabolic process	19	0	0.31	1
GO:0042158	lipoprotein biosynthetic process	19	0	0.31	1
GO:0042176	regulation of protein catabolic process	10	0	0.16	1
GO:0042180	cellular ketone metabolic process	14	0	0.23	1
GO:0042181	ketone biosynthetic process	10	0	0.16	1
GO:0042325	regulation of phosphorylation	15	0	0.24	1
GO:0042398	cellular modified amino acid biosynthetic process	32	0	0.52	1
GO:0042401	cellular biogenic amine biosynthetic process	22	0	0.36	1
GO:0042430	indole-containing compound metabolic process	17	0	0.27	1
GO:0042439	ethanolamine-containing compound metabolic process	12	0	0.19	1
GO:0042440	pigment metabolic process	45	0	0.73	1
GO:0042545	cell wall modification	74	0	1.2	1
GO:0042546	cell wall biogenesis	20	0	0.32	1
GO:0042558	pteridine-containing compound metabolic process	20	0	0.32	1
GO:0042559	pteridine-containing compound biosynthetic process	17	0	0.27	1
GO:0042726	flavin-containing compound metabolic process	16	0	0.26	1
GO:0042727	flavin-containing compound biosynthetic process	16	0	0.26	1
GO:0042773	ATP synthesis coupled electron transport	27	0	0.44	1
GO:0042775	mitochondrial ATP synthesis coupled electron transport	11	0	0.18	1
GO:0042886	amide transport	15	0	0.24	1
GO:0043062	extracellular structure organization	12	0	0.19	1
GO:0043094	cellular metabolic compound salvage	20	0	0.32	1
GO:0043101	purine-containing compound salvage	11	0	0.18	1
GO:0043161	proteasome-mediated ubiquitin-dependent protein catabolic process	11	0	0.18	1
GO:0043413	macromolecule glycosylation	59	0	0.95	1
GO:0043414	macromolecule methylation	55	0	0.89	1
GO:0043549	regulation of kinase activity	14	0	0.23	1
GO:0044106	cellular amine metabolic process	46	0	0.74	1
GO:0044242	cellular lipid catabolic process	10	0	0.16	1
GO:0044282	small molecule catabolic process	36	0	0.58	1
GO:0044702	single organism reproductive process	103	0	1.67	1
GO:0044703	multi-organism reproductive process	102	0	1.65	1
GO:0044706	multi-multicellular organism process	97	0	1.57	1
GO:0044712	single-organism catabolic process	156	0	2.52	1
GO:0044724	single-organism carbohydrate catabolic process	71	0	1.15	1
GO:0044744	protein targeting to nucleus	10	0	0.16	1
GO:0044802	single-organism membrane organization	29	0	0.47	1
GO:0045017	glycerolipid biosynthetic process	35	0	0.57	1
GO:0045047	protein targeting to ER	17	0	0.27	1
GO:0045229	external encapsulating structure organization	116	0	1.88	1
GO:0045333	cellular respiration	63	0	1.02	1
GO:0045859	regulation of protein kinase activity	14	0	0.23	1
GO:0045893	positive regulation of transcription, DNA-templated	18	0	0.29	1
GO:0045934	negative regulation of nucleobase-containing compound metabolic process	12	0	0.19	1
GO:0045935	positive regulation of nucleobase-containing compound metabolic process	18	0	0.29	1
GO:0046031	ADP metabolic process	66	0	1.07	1
GO:0046040	IMP metabolic process	13	0	0.21	1
GO:0046112	nucleobase biosynthetic process	21	0	0.34	1
GO:0046131	pyrimidine ribonucleoside metabolic process	14	0	0.23	1
GO:0046132	pyrimidine ribonucleoside biosynthetic process	12	0	0.19	1
GO:0046134	pyrimidine nucleoside biosynthetic process	12	0	0.19	1
GO:0046148	pigment biosynthetic process	39	0	0.63	1
GO:0046271	phenylpropanoid catabolic process	30	0	0.49	1
GO:0046274	lignin catabolic process	30	0	0.49	1
GO:0046351	disaccharide biosynthetic process	26	0	0.42	1
GO:0046395	carboxylic acid catabolic process	30	0	0.49	1
GO:0046467	membrane lipid biosynthetic process	25	0	0.4	1
GO:0046470	phosphatidylcholine metabolic process	12	0	0.19	1
GO:0046474	glycerophospholipid biosynthetic process	25	0	0.4	1
GO:0046486	glycerolipid metabolic process	102	0	1.65	1
GO:0046488	phosphatidylinositol metabolic process	74	0	1.2	1
GO:0046496	nicotinamide nucleotide metabolic process	101	0	1.63	1
GO:0046834	lipid phosphorylation	14	0	0.23	1
GO:0046839	phospholipid dephosphorylation	21	0	0.34	1
GO:0046854	phosphatidylinositol phosphorylation	14	0	0.23	1
GO:0046856	phosphatidylinositol dephosphorylation	21	0	0.34	1
GO:0046939	nucleotide phosphorylation	73	0	1.18	1
GO:0048193	Golgi vesicle transport	47	0	0.76	1
GO:0048268	clathrin coat assembly	13	0	0.21	1
GO:0048285	organelle fission	25	0	0.4	1
GO:0048519	negative regulation of biological process	45	0	0.73	1
GO:0048523	negative regulation of cellular process	28	0	0.45	1
GO:0048544	recognition of pollen	97	0	1.57	1
GO:0048856	anatomical structure development	12	0	0.19	1
GO:0048878	chemical homeostasis	10	0	0.16	1
GO:0050790	regulation of catalytic activity	23	0	0.37	1
GO:0050801	ion homeostasis	10	0	0.16	1
GO:0051052	regulation of DNA metabolic process	11	0	0.18	1
GO:0051156	glucose 6-phosphate metabolic process	22	0	0.36	1
GO:0051170	nuclear import	10	0	0.16	1
GO:0051172	negative regulation of nitrogen compound metabolic process	15	0	0.24	1
GO:0051174	regulation of phosphorus metabolic process	16	0	0.26	1
GO:0051205	protein insertion into membrane	10	0	0.16	1
GO:0051254	positive regulation of RNA metabolic process	18	0	0.29	1
GO:0051301	cell division	29	0	0.47	1
GO:0051338	regulation of transferase activity	17	0	0.27	1
GO:0051704	multi-organism process	107	0	1.73	1
GO:0051726	regulation of cell cycle	30	0	0.49	1
GO:0055080	cation homeostasis	10	0	0.16	1
GO:0061024	membrane organization	42	0	0.68	1
GO:0065009	regulation of molecular function	25	0	0.4	1
GO:0070085	glycosylation	70	0	1.13	1
GO:0070588	calcium ion transmembrane transport	19	0	0.31	1
GO:0070726	cell wall assembly	12	0	0.19	1
GO:0070838	divalent metal ion transport	52	0	0.84	1
GO:0070972	protein localization to endoplasmic reticulum	25	0	0.4	1
GO:0071555	cell wall organization	116	0	1.88	1
GO:0071668	plant-type cell wall assembly	12	0	0.19	1
GO:0071669	plant-type cell wall organization or biogenesis	42	0	0.68	1
GO:0071804	cellular potassium ion transport	39	0	0.63	1
GO:0071805	potassium ion transmembrane transport	39	0	0.63	1
GO:0071900	regulation of protein serine/threonine kinase activity	14	0	0.23	1
GO:0072348	sulfur compound transport	18	0	0.29	1
GO:0072350	tricarboxylic acid metabolic process	29	0	0.47	1
GO:0072511	divalent inorganic cation transport	52	0	0.84	1
GO:0072527	pyrimidine-containing compound metabolic process	48	0	0.78	1
GO:0072528	pyrimidine-containing compound biosynthetic process	44	0	0.71	1
GO:0072593	reactive oxygen species metabolic process	20	0	0.32	1
GO:0072594	establishment of protein localization to organelle	36	0	0.58	1
GO:0072599	establishment of protein localization to endoplasmic reticulum	17	0	0.27	1
GO:0072657	protein localization to membrane	28	0	0.45	1
GO:0090150	establishment of protein localization to membrane	28	0	0.45	1
GO:0090662	ATP hydrolysis coupled transmembrane transport	37	0	0.6	1
GO:0097164	ammonium ion metabolic process	19	0	0.31	1
GO:0098771	inorganic ion homeostasis	10	0	0.16	1
GO:0098813	nuclear chromosome segregation	11	0	0.18	1
GO:1901068	guanosine-containing compound metabolic process	13	0	0.21	1
GO:1901264	carbohydrate derivative transport	13	0	0.21	1
GO:1901606	alpha-amino acid catabolic process	20	0	0.32	1
GO:1901661	quinone metabolic process	10	0	0.16	1
GO:1901663	quinone biosynthetic process	10	0	0.16	1
GO:1902221	erythrose 4-phosphate/phosphoenolpyruvate family amino acid metabolic process	11	0	0.18	1
GO:1902580	single-organism cellular localization	48	0	0.78	1
GO:1902582	single-organism intracellular transport	128	0	2.07	1
GO:1902593	single-organism nuclear import	10	0	0.16	1
GO:1902680	positive regulation of RNA biosynthetic process	18	0	0.29	1
GO:1903047	mitotic cell cycle process	23	0	0.37	1
GO:1903508	positive regulation of nucleic acid-templated transcription	18	0	0.29	1
GO:1903509	liposaccharide metabolic process	31	0	0.5	1
GO:1904029	regulation of cyclin-dependent protein kinase activity	14	0	0.23	1
GO:2000113	negative regulation of cellular macromolecule biosynthetic process	13	0	0.21	1

## Sheet: Zero H2 GO enrichment
GO.ID	Term	Annotated	Significant	Expected	p.value
GO:0042545	cell wall modification	74	16	3.49	2.6e-07
GO:0045229	external encapsulating structure organization	116	19	5.48	1.9e-06
GO:0071555	cell wall organization	116	19	5.48	1.9e-06
GO:0071554	cell wall organization or biogenesis	138	20	6.52	7.1e-06
GO:0006355	regulation of transcription, DNA-templated	1104	67	52.14	0.019
GO:1903506	regulation of nucleic acid-templated transcription	1104	67	52.14	0.019
GO:2001141	regulation of RNA biosynthetic process	1104	67	52.14	0.019
GO:0051252	regulation of RNA metabolic process	1107	67	52.28	0.02
GO:0019219	regulation of nucleobase-containing compound metabolic process	1118	67	52.8	0.024
GO:0009889	regulation of biosynthetic process	1120	67	52.89	0.025
GO:0010556	regulation of macromolecule biosynthetic process	1120	67	52.89	0.025
GO:0031326	regulation of cellular biosynthetic process	1120	67	52.89	0.025
GO:2000112	regulation of cellular macromolecule biosynthetic process	1120	67	52.89	0.025
GO:0006979	response to oxidative stress	106	10	5.01	0.028
GO:0051171	regulation of nitrogen compound metabolic process	1128	67	53.27	0.028
GO:0010468	regulation of gene expression	1131	67	53.41	0.03
GO:0006869	lipid transport	64	7	3.02	0.031
GO:0010876	lipid localization	64	7	3.02	0.031
GO:0005975	carbohydrate metabolic process	831	51	39.24	0.031
GO:0009607	response to biotic stimulus	27	4	1.28	0.036
GO:0055114	oxidation-reduction process	1496	85	70.65	0.038
GO:0031323	regulation of cellular metabolic process	1149	67	54.26	0.039
GO:0080090	regulation of primary metabolic process	1152	67	54.4	0.041
GO:0060255	regulation of macromolecule metabolic process	1169	67	55.21	0.053
GO:0019222	regulation of metabolic process	1178	67	55.63	0.06
GO:0006811	ion transport	559	34	26.4	0.077
GO:0006351	transcription, DNA-templated	1239	69	58.51	0.081
GO:0097659	nucleic acid-templated transcription	1239	69	58.51	0.081
GO:0032774	RNA biosynthetic process	1241	69	58.61	0.083
GO:0034654	nucleobase-containing compound biosynthetic process	1390	76	65.64	0.094
GO:0006950	response to stress	425	26	20.07	0.106
GO:0000160	phosphorelay signal transduction system	85	7	4.01	0.106
GO:0009611	response to wounding	12	2	0.57	0.107
GO:0048856	anatomical structure development	12	2	0.57	0.107
GO:0009605	response to external stimulus	13	2	0.61	0.123
GO:0044765	single-organism transport	1238	67	58.47	0.128
GO:0006820	anion transport	126	9	5.95	0.141
GO:0006468	protein phosphorylation	1394	74	65.83	0.151
GO:0006855	drug transmembrane transport	60	5	2.83	0.153
GO:0015893	drug transport	60	5	2.83	0.153
GO:0042493	response to drug	60	5	2.83	0.153
GO:1902578	single-organism localization	1261	67	59.55	0.164
GO:0009966	regulation of signal transduction	79	6	3.73	0.169
GO:0010646	regulation of cell communication	79	6	3.73	0.169
GO:0023051	regulation of signaling	79	6	3.73	0.169
GO:0018130	heterocycle biosynthetic process	1530	80	72.26	0.174
GO:0050896	response to stimulus	1049	56	49.54	0.181
GO:0006754	ATP biosynthetic process	48	4	2.27	0.19
GO:0010035	response to inorganic substance	17	2	0.8	0.19
GO:0015696	ammonium transport	17	2	0.8	0.19
GO:0015994	chlorophyll metabolic process	17	2	0.8	0.19
GO:0006812	cation transport	420	24	19.83	0.193
GO:0032501	multicellular organismal process	118	8	5.57	0.194
GO:1901362	organic cyclic compound biosynthetic process	1566	81	73.96	0.2
GO:0015711	organic anion transport	66	5	3.12	0.2
GO:0006835	dicarboxylic acid transport	18	2	0.85	0.208
GO:0015740	C4-dicarboxylate transport	18	2	0.85	0.208
GO:0015743	malate transport	18	2	0.85	0.208
GO:0015849	organic acid transport	51	4	2.41	0.22
GO:0046942	carboxylic acid transport	51	4	2.41	0.22
GO:0019751	polyol metabolic process	19	2	0.9	0.225
GO:0042451	purine nucleoside biosynthetic process	70	5	3.31	0.235
GO:0046129	purine ribonucleoside biosynthetic process	70	5	3.31	0.235
GO:0055085	transmembrane transport	772	41	36.46	0.235
GO:0019438	aromatic compound biosynthetic process	1506	77	71.12	0.24
GO:0050794	regulation of cellular process	1815	92	85.71	0.241
GO:0051704	multi-organism process	107	7	5.05	0.241
GO:0016310	phosphorylation	1531	78	72.3	0.248
GO:0044262	cellular carbohydrate metabolic process	165	10	7.79	0.253
GO:0015985	energy coupled proton transport, down electrochemical gradient	37	3	1.75	0.253
GO:0015986	ATP synthesis coupled proton transport	37	3	1.75	0.253
GO:0009142	nucleoside triphosphate biosynthetic process	55	4	2.6	0.261
GO:0009145	purine nucleoside triphosphate biosynthetic process	55	4	2.6	0.261
GO:0009201	ribonucleoside triphosphate biosynthetic process	55	4	2.6	0.261
GO:0009206	purine ribonucleoside triphosphate biosynthetic process	55	4	2.6	0.261
GO:0007275	multicellular organism development	21	2	0.99	0.261
GO:0044707	single-multicellular organism process	21	2	0.99	0.261
GO:0048583	regulation of response to stimulus	92	6	4.34	0.268
GO:0019684	photosynthesis, light reaction	22	2	1.04	0.279
GO:0009163	nucleoside biosynthetic process	78	5	3.68	0.308
GO:0042455	ribonucleoside biosynthetic process	78	5	3.68	0.308
GO:1901659	glycosyl compound biosynthetic process	78	5	3.68	0.308
GO:0008037	cell recognition	97	6	4.58	0.309
GO:0009856	pollination	97	6	4.58	0.309
GO:0009875	pollen-pistil interaction	97	6	4.58	0.309
GO:0044706	multi-multicellular organism process	97	6	4.58	0.309
GO:0048544	recognition of pollen	97	6	4.58	0.309
GO:0072522	purine-containing compound biosynthetic process	97	6	4.58	0.309
GO:0035556	intracellular signal transduction	253	14	11.95	0.309
GO:0006022	aminoglycan metabolic process	24	2	1.13	0.314
GO:0009664	plant-type cell wall organization	42	3	1.98	0.319
GO:0071669	plant-type cell wall organization or biogenesis	42	3	1.98	0.319
GO:0050789	regulation of biological process	1862	92	87.93	0.332
GO:0000375	RNA splicing, via transesterification reactions	25	2	1.18	0.332
GO:0000377	RNA splicing, via transesterification reactions with bulged adenosine as nucleophile	25	2	1.18	0.332
GO:0000398	mRNA splicing, via spliceosome	25	2	1.18	0.332
GO:0065007	biological regulation	1905	94	89.97	0.335
GO:0009127	purine nucleoside monophosphate biosynthetic process	62	4	2.93	0.336
GO:0009168	purine ribonucleoside monophosphate biosynthetic process	62	4	2.93	0.336
GO:0015979	photosynthesis	101	6	4.77	0.342
GO:0006164	purine nucleotide biosynthetic process	82	5	3.87	0.346
GO:0006073	cellular glucan metabolic process	102	6	4.82	0.351
GO:0044042	glucan metabolic process	102	6	4.82	0.351
GO:0044264	cellular polysaccharide metabolic process	102	6	4.82	0.351
GO:0044703	multi-organism reproductive process	102	6	4.82	0.351
GO:0006952	defense response	64	4	3.02	0.358
GO:0015698	inorganic anion transport	45	3	2.13	0.358
GO:0044702	single organism reproductive process	103	6	4.86	0.359
GO:0042221	response to chemical	123	7	5.81	0.362
GO:0032502	developmental process	27	2	1.28	0.367
GO:0044767	single-organism developmental process	27	2	1.28	0.367
GO:0016070	RNA metabolic process	1571	77	74.19	0.379
GO:0001101	response to acid chemical	10	1	0.47	0.384
GO:0007154	cell communication	619	31	29.23	0.393
GO:0009628	response to abiotic stimulus	29	2	1.37	0.401
GO:0006074	(1->3)-beta-D-glucan metabolic process	11	1	0.52	0.413
GO:0006075	(1->3)-beta-D-glucan biosynthetic process	11	1	0.52	0.413
GO:0006487	protein N-linked glycosylation	11	1	0.52	0.413
GO:0043101	purine-containing compound salvage	11	1	0.52	0.413
GO:0000003	reproduction	110	6	5.19	0.419
GO:0022414	reproductive process	110	6	5.19	0.419
GO:0009156	ribonucleoside monophosphate biosynthetic process	70	4	3.31	0.423
GO:0006414	translational elongation	31	2	1.46	0.434
GO:0006810	transport	1784	86	84.25	0.435
GO:0006298	mismatch repair	12	1	0.57	0.441
GO:0006536	glutamate metabolic process	12	1	0.57	0.441
GO:0009832	plant-type cell wall biogenesis	12	1	0.57	0.441
GO:0010215	cellulose microfibril organization	12	1	0.57	0.441
GO:0016049	cell growth	12	1	0.57	0.441
GO:0030198	extracellular matrix organization	12	1	0.57	0.441
GO:0040007	growth	12	1	0.57	0.441
GO:0043062	extracellular structure organization	12	1	0.57	0.441
GO:0070726	cell wall assembly	12	1	0.57	0.441
GO:0071668	plant-type cell wall assembly	12	1	0.57	0.441
GO:0006464	cellular protein modification process	1808	87	85.38	0.442
GO:0036211	protein modification process	1808	87	85.38	0.442
GO:0009124	nucleoside monophosphate biosynthetic process	72	4	3.4	0.444
GO:0005976	polysaccharide metabolic process	114	6	5.38	0.453
GO:0051234	establishment of localization	1794	86	84.72	0.458
GO:0006260	DNA replication	74	4	3.49	0.465
GO:0042278	purine nucleoside metabolic process	178	9	8.41	0.466
GO:0046128	purine ribonucleoside metabolic process	178	9	8.41	0.466
GO:0008380	RNA splicing	33	2	1.56	0.466
GO:0006354	DNA-templated transcription, elongation	13	1	0.61	0.467
GO:0032784	regulation of DNA-templated transcription, elongation	13	1	0.61	0.467
GO:1901068	guanosine-containing compound metabolic process	13	1	0.61	0.467
GO:1901264	carbohydrate derivative transport	13	1	0.61	0.467
GO:0044271	cellular nitrogen compound biosynthetic process	2076	99	98.04	0.475
GO:0009152	purine ribonucleotide biosynthetic process	75	4	3.54	0.476
GO:0006479	protein methylation	34	2	1.61	0.482
GO:0008213	protein alkylation	34	2	1.61	0.482
GO:0034645	cellular macromolecule biosynthetic process	2016	96	95.21	0.482
GO:0009059	macromolecule biosynthetic process	2017	96	95.25	0.484
GO:0051179	localization	1807	86	85.34	0.487
GO:0006749	glutathione metabolic process	14	1	0.66	0.492
GO:0015995	chlorophyll biosynthetic process	14	1	0.66	0.492
GO:0016998	cell wall macromolecule catabolic process	14	1	0.66	0.492
GO:0044036	cell wall macromolecule metabolic process	14	1	0.66	0.492
GO:0006778	porphyrin-containing compound metabolic process	35	2	1.65	0.497
GO:0090304	nucleic acid metabolic process	1817	86	85.81	0.51
GO:0006694	steroid biosynthetic process	15	1	0.71	0.516
GO:0015914	phospholipid transport	15	1	0.71	0.516
GO:0016043	cellular component organization	505	24	23.85	0.518
GO:0016567	protein ubiquitination	122	6	5.76	0.519
GO:0009260	ribonucleotide biosynthetic process	80	4	3.78	0.526
GO:0046390	ribose phosphate biosynthetic process	80	4	3.78	0.526
GO:0006066	alcohol metabolic process	37	2	1.75	0.527
GO:0046034	ATP metabolic process	145	7	6.85	0.531
GO:0009119	ribonucleoside metabolic process	188	9	8.88	0.532
GO:0006261	DNA-dependent DNA replication	16	1	0.76	0.539
GO:0006771	riboflavin metabolic process	16	1	0.76	0.539
GO:0009231	riboflavin biosynthetic process	16	1	0.76	0.539
GO:0009266	response to temperature stimulus	16	1	0.76	0.539
GO:0009408	response to heat	16	1	0.76	0.539
GO:0042726	flavin-containing compound metabolic process	16	1	0.76	0.539
GO:0042727	flavin-containing compound biosynthetic process	16	1	0.76	0.539
GO:0016569	covalent chromatin modification	38	2	1.79	0.542
GO:0016570	histone modification	38	2	1.79	0.542
GO:0072521	purine-containing compound metabolic process	211	10	9.96	0.542
GO:0009165	nucleotide biosynthetic process	125	6	5.9	0.543
GO:1901293	nucleoside phosphate biosynthetic process	125	6	5.9	0.543
GO:0032446	protein modification by small protein conjugation	127	6	6	0.559
GO:0030029	actin filament-based process	17	1	0.8	0.561
GO:0030036	actin cytoskeleton organization	17	1	0.8	0.561
GO:0033865	nucleoside bisphosphate metabolic process	17	1	0.8	0.561
GO:0033875	ribonucleoside bisphosphate metabolic process	17	1	0.8	0.561
GO:0034032	purine nucleoside bisphosphate metabolic process	17	1	0.8	0.561
GO:1901700	response to oxygen-containing compound	17	1	0.8	0.561
GO:0007165	signal transduction	516	24	24.37	0.562
GO:0023052	signaling	516	24	24.37	0.562
GO:0044700	single organism signaling	516	24	24.37	0.562
GO:0022900	electron transport chain	62	3	2.93	0.566
GO:0006163	purine nucleotide metabolic process	194	9	9.16	0.57
GO:0006796	phosphate-containing compound metabolic process	1930	90	91.15	0.572
GO:0070647	protein modification by small protein conjugation or removal	129	6	6.09	0.574
GO:0006793	phosphorus metabolic process	1932	90	91.24	0.577
GO:0005985	sucrose metabolic process	18	1	0.85	0.582
GO:0006839	mitochondrial transport	18	1	0.85	0.582
GO:0008202	steroid metabolic process	18	1	0.85	0.582
GO:0016571	histone methylation	18	1	0.85	0.582
GO:0034968	histone lysine methylation	18	1	0.85	0.582
GO:0009144	purine nucleoside triphosphate metabolic process	152	7	7.18	0.582
GO:0009199	ribonucleoside triphosphate metabolic process	152	7	7.18	0.582
GO:0009205	purine ribonucleoside triphosphate metabolic process	152	7	7.18	0.582
GO:0043412	macromolecule modification	1871	87	88.36	0.583
GO:0009100	glycoprotein metabolic process	64	3	3.02	0.588
GO:0009101	glycoprotein biosynthetic process	64	3	3.02	0.588
GO:0044272	sulfur compound biosynthetic process	64	3	3.02	0.588
GO:1902600	hydrogen ion transmembrane transport	65	3	3.07	0.599
GO:0006026	aminoglycan catabolic process	19	1	0.9	0.601
GO:0006030	chitin metabolic process	19	1	0.9	0.601
GO:0006032	chitin catabolic process	19	1	0.9	0.601
GO:0015748	organophosphate ester transport	19	1	0.9	0.601
GO:0018022	peptidyl-lysine methylation	19	1	0.9	0.601
GO:0046348	amino sugar catabolic process	19	1	0.9	0.601
GO:1901071	glucosamine-containing compound metabolic process	19	1	0.9	0.601
GO:1901072	glucosamine-containing compound catabolic process	19	1	0.9	0.601
GO:0006091	generation of precursor metabolites and energy	177	8	8.36	0.602
GO:0006397	mRNA processing	66	3	3.12	0.609
GO:0005984	disaccharide metabolic process	43	2	2.03	0.609
GO:0016568	chromatin modification	43	2	2.03	0.609
GO:0009141	nucleoside triphosphate metabolic process	156	7	7.37	0.609
GO:0071840	cellular component organization or biogenesis	573	26	27.06	0.614
GO:0006040	amino sugar metabolic process	20	1	0.94	0.62
GO:0042546	cell wall biogenesis	20	1	0.94	0.62
GO:0043094	cellular metabolic compound salvage	20	1	0.94	0.62
GO:0009126	purine nucleoside monophosphate metabolic process	159	7	7.51	0.629
GO:0009167	purine ribonucleoside monophosphate metabolic process	159	7	7.51	0.629
GO:0044260	cellular macromolecule metabolic process	4345	202	205.2	0.63
GO:0042440	pigment metabolic process	45	2	2.13	0.634
GO:1901615	organic hydroxy compound metabolic process	45	2	2.13	0.634
GO:0015074	DNA integration	21	1	0.99	0.638
GO:0046839	phospholipid dephosphorylation	21	1	0.99	0.638
GO:0046856	phosphatidylinositol dephosphorylation	21	1	0.99	0.638
GO:0009150	purine ribonucleotide metabolic process	183	8	8.64	0.639
GO:0033013	tetrapyrrole metabolic process	46	2	2.17	0.646
GO:0009116	nucleoside metabolic process	207	9	9.78	0.648
GO:1901657	glycosyl compound metabolic process	207	9	9.78	0.648
GO:0009309	amine biosynthetic process	22	1	1.04	0.655
GO:0042401	cellular biogenic amine biosynthetic process	22	1	1.04	0.655
GO:0006887	exocytosis	47	2	2.22	0.658
GO:0010467	gene expression	2058	94	97.19	0.66
GO:0009259	ribonucleotide metabolic process	188	8	8.88	0.669
GO:0009311	oligosaccharide metabolic process	48	2	2.27	0.669
GO:0005992	trehalose biosynthetic process	23	1	1.09	0.672
GO:1901137	carbohydrate derivative biosynthetic process	189	8	8.93	0.675
GO:0051716	cellular response to stimulus	657	29	31.03	0.677
GO:0009161	ribonucleoside monophosphate metabolic process	167	7	7.89	0.68
GO:0006818	hydrogen transport	74	3	3.49	0.686
GO:0009308	amine metabolic process	74	3	3.49	0.686
GO:0015992	proton transport	74	3	3.49	0.686
GO:0046488	phosphatidylinositol metabolic process	74	3	3.49	0.686
GO:0006284	base-excision repair	24	1	1.13	0.687
GO:0006888	ER to Golgi vesicle-mediated transport	24	1	1.13	0.687
GO:0032940	secretion by cell	50	2	2.36	0.691
GO:0046903	secretion	50	2	2.36	0.691
GO:0008152	metabolic process	8732	408	412.38	0.691
GO:0009123	nucleoside monophosphate metabolic process	169	7	7.98	0.692
GO:0005991	trehalose metabolic process	25	1	1.18	0.702
GO:0016071	mRNA metabolic process	76	3	3.59	0.703
GO:0071705	nitrogen compound transport	77	3	3.64	0.711
GO:0051273	beta-glucan metabolic process	52	2	2.46	0.712
GO:0051274	beta-glucan biosynthetic process	52	2	2.46	0.712
GO:0044710	single-organism metabolic process	2946	134	139.13	0.712
GO:0046351	disaccharide biosynthetic process	26	1	1.23	0.716
GO:0006119	oxidative phosphorylation	27	1	1.28	0.73
GO:0009060	aerobic respiration	27	1	1.28	0.73
GO:0009084	glutamine family amino acid biosynthetic process	27	1	1.28	0.73
GO:0042773	ATP synthesis coupled electron transport	27	1	1.28	0.73
GO:0006139	nucleobase-containing compound metabolic process	2166	97	102.29	0.74
GO:0043414	macromolecule methylation	55	2	2.6	0.74
GO:0003333	amino acid transmembrane transport	28	1	1.32	0.742
GO:0006865	amino acid transport	28	1	1.32	0.742
GO:0098656	anion transmembrane transport	28	1	1.32	0.742
GO:1903825	organic acid transmembrane transport	28	1	1.32	0.742
GO:1901565	organonitrogen compound catabolic process	56	2	2.64	0.749
GO:0072330	monocarboxylic acid biosynthetic process	107	4	5.05	0.75
GO:0006221	pyrimidine nucleotide biosynthetic process	29	1	1.37	0.755
GO:0006310	DNA recombination	29	1	1.37	0.755
GO:0006779	porphyrin-containing compound biosynthetic process	29	1	1.37	0.755
GO:0018205	peptidyl-lysine modification	29	1	1.37	0.755
GO:0072350	tricarboxylic acid metabolic process	29	1	1.37	0.755
GO:0006281	DNA repair	134	5	6.33	0.765
GO:0007264	small GTPase mediated signal transduction	134	5	6.33	0.765
GO:0009312	oligosaccharide biosynthetic process	30	1	1.42	0.766
GO:0008033	tRNA processing	58	2	2.74	0.767
GO:0006486	protein glycosylation	59	2	2.79	0.775
GO:0043413	macromolecule glycosylation	59	2	2.79	0.775
GO:0006974	cellular response to DNA damage stimulus	136	5	6.42	0.776
GO:0006220	pyrimidine nucleotide metabolic process	31	1	1.46	0.777
GO:0044270	cellular nitrogen compound catabolic process	31	1	1.46	0.777
GO:0046700	heterocycle catabolic process	31	1	1.46	0.777
GO:1901136	carbohydrate derivative catabolic process	31	1	1.46	0.777
GO:0019693	ribose phosphate metabolic process	210	8	9.92	0.781
GO:0043170	macromolecule metabolic process	4814	219	227.35	0.784
GO:0046483	heterocycle metabolic process	2325	103	109.8	0.787
GO:0006357	regulation of transcription from RNA polymerase II promoter	32	1	1.51	0.788
GO:0009110	vitamin biosynthetic process	32	1	1.51	0.788
GO:0042364	water-soluble vitamin biosynthetic process	32	1	1.51	0.788
GO:0042398	cellular modified amino acid biosynthetic process	32	1	1.51	0.788
GO:0033554	cellular response to stress	139	5	6.56	0.792
GO:0044699	single-organism process	5184	236	244.82	0.794
GO:0007186	G-protein coupled receptor signaling pathway	33	1	1.56	0.798
GO:0019748	secondary metabolic process	33	1	1.56	0.798
GO:0009117	nucleotide metabolic process	262	10	12.37	0.798
GO:0045333	cellular respiration	63	2	2.98	0.805
GO:0006766	vitamin metabolic process	34	1	1.61	0.807
GO:0006767	water-soluble vitamin metabolic process	34	1	1.61	0.807
GO:0006650	glycerophospholipid metabolic process	92	3	4.34	0.816
GO:0006790	sulfur compound metabolic process	92	3	4.34	0.816
GO:0006753	nucleoside phosphate metabolic process	267	10	12.61	0.816
GO:0030001	metal ion transport	267	10	12.61	0.816
GO:0042254	ribosome biogenesis	65	2	3.07	0.819
GO:0022904	respiratory electron transport chain	36	1	1.7	0.825
GO:0006096	glycolytic process	66	2	3.12	0.825
GO:0006757	ATP generation from ADP	66	2	3.12	0.825
GO:0009135	purine nucleoside diphosphate metabolic process	66	2	3.12	0.825
GO:0009179	purine ribonucleoside diphosphate metabolic process	66	2	3.12	0.825
GO:0009185	ribonucleoside diphosphate metabolic process	66	2	3.12	0.825
GO:0046031	ADP metabolic process	66	2	3.12	0.825
GO:0006364	rRNA processing	37	1	1.75	0.834
GO:0015988	energy coupled proton transmembrane transport, against electrochemical gradient	37	1	1.75	0.834
GO:0015991	ATP hydrolysis coupled proton transport	37	1	1.75	0.834
GO:0016072	rRNA metabolic process	37	1	1.75	0.834
GO:0090662	ATP hydrolysis coupled transmembrane transport	37	1	1.75	0.834
GO:0006633	fatty acid biosynthetic process	97	3	4.58	0.843
GO:0044267	cellular protein metabolic process	2502	109	118.16	0.848
GO:0046148	pigment biosynthetic process	39	1	1.84	0.849
GO:0006090	pyruvate metabolic process	70	2	3.31	0.85
GO:0032259	methylation	70	2	3.31	0.85
GO:0070085	glycosylation	70	2	3.31	0.85
GO:0034637	cellular carbohydrate biosynthetic process	99	3	4.68	0.853
GO:0000271	polysaccharide biosynthetic process	71	2	3.35	0.855
GO:0009250	glucan biosynthetic process	71	2	3.35	0.855
GO:0033692	cellular polysaccharide biosynthetic process	71	2	3.35	0.855
GO:0044724	single-organism carbohydrate catabolic process	71	2	3.35	0.855
GO:0033014	tetrapyrrole biosynthetic process	40	1	1.89	0.856
GO:0006259	DNA metabolic process	255	9	12.04	0.857
GO:0009064	glutamine family amino acid metabolic process	41	1	1.94	0.863
GO:0030243	cellulose metabolic process	41	1	1.94	0.863
GO:0030244	cellulose biosynthetic process	41	1	1.94	0.863
GO:0006511	ubiquitin-dependent protein catabolic process	129	4	6.09	0.865
GO:0019941	modification-dependent protein catabolic process	129	4	6.09	0.865
GO:0043632	modification-dependent macromolecule catabolic process	129	4	6.09	0.865
GO:0055086	nucleobase-containing small molecule metabolic process	307	11	14.5	0.865
GO:0006165	nucleoside diphosphate phosphorylation	73	2	3.45	0.866
GO:0046939	nucleotide phosphorylation	73	2	3.45	0.866
GO:0046486	glycerolipid metabolic process	102	3	4.82	0.867
GO:0022613	ribonucleoprotein complex biogenesis	74	2	3.49	0.871
GO:0090407	organophosphate biosynthetic process	184	6	8.69	0.872
GO:1901360	organic cyclic compound metabolic process	2395	103	113.11	0.875
GO:0015980	energy derivation by oxidation of organic compounds	75	2	3.54	0.876
GO:0009132	nucleoside diphosphate metabolic process	76	2	3.59	0.88
GO:0072528	pyrimidine-containing compound biosynthetic process	44	1	2.08	0.881
GO:0015672	monovalent inorganic cation transport	161	5	7.6	0.883
GO:0006631	fatty acid metabolic process	108	3	5.1	0.891
GO:0016051	carbohydrate biosynthetic process	108	3	5.1	0.891
GO:0006508	proteolysis	560	21	26.45	0.891
GO:0006576	cellular biogenic amine metabolic process	46	1	2.17	0.892
GO:0044106	cellular amine metabolic process	46	1	2.17	0.892
GO:0018193	peptidyl-amino acid modification	79	2	3.73	0.893
GO:0043623	cellular protein complex assembly	79	2	3.73	0.893
GO:0019538	protein metabolic process	2940	127	138.84	0.894
GO:0006575	cellular modified amino acid metabolic process	47	1	2.22	0.898
GO:0048193	Golgi vesicle transport	47	1	2.22	0.898
GO:0051258	protein polymerization	47	1	2.22	0.898
GO:0006725	cellular aromatic compound metabolic process	2353	100	111.12	0.898
GO:0032787	monocarboxylic acid metabolic process	194	6	9.16	0.901
GO:0006366	transcription from RNA polymerase II promoter	48	1	2.27	0.902
GO:0072527	pyrimidine-containing compound metabolic process	48	1	2.27	0.902
GO:0044249	cellular biosynthetic process	2667	114	125.95	0.903
GO:0044723	single-organism carbohydrate metabolic process	325	11	15.35	0.906
GO:0019318	hexose metabolic process	49	1	2.31	0.907
GO:0006325	chromatin organization	83	2	3.92	0.909
GO:0016052	carbohydrate catabolic process	83	2	3.92	0.909
GO:1901576	organic substance biosynthetic process	2696	115	127.32	0.909
GO:0044238	primary metabolic process	6435	289	303.9	0.912
GO:0006470	protein dephosphorylation	85	2	4.01	0.915
GO:0016311	dephosphorylation	116	3	5.48	0.917
GO:1902589	single-organism organelle organization	116	3	5.48	0.917
GO:0030258	lipid modification	52	1	2.46	0.92
GO:0006644	phospholipid metabolic process	118	3	5.57	0.922
GO:1901135	carbohydrate derivative metabolic process	386	13	18.23	0.925
GO:0043043	peptide biosynthetic process	560	20	26.45	0.927
GO:0006352	DNA-templated transcription, initiation	54	1	2.55	0.927
GO:0006399	tRNA metabolic process	120	3	5.67	0.927
GO:0034470	ncRNA processing	89	2	4.2	0.928
GO:0044257	cellular protein catabolic process	150	4	7.08	0.929
GO:0051603	proteolysis involved in cellular protein catabolic process	150	4	7.08	0.929
GO:0007018	microtubule-based movement	90	2	4.25	0.931
GO:0006720	isoprenoid metabolic process	55	1	2.6	0.931
GO:0008299	isoprenoid biosynthetic process	55	1	2.6	0.931
GO:0043648	dicarboxylic acid metabolic process	55	1	2.6	0.931
GO:0006396	RNA processing	235	7	11.1	0.932
GO:0071702	organic substance transport	492	17	23.24	0.934
GO:0006928	movement of cell or subcellular component	93	2	4.39	0.938
GO:0009058	biosynthetic process	2872	121	135.63	0.939
GO:0007010	cytoskeleton organization	58	1	2.74	0.94
GO:0034641	cellular nitrogen compound metabolic process	2857	120	134.92	0.943
GO:0005996	monosaccharide metabolic process	59	1	2.79	0.943
GO:0006518	peptide metabolic process	578	20	27.3	0.947
GO:0006418	tRNA aminoacylation for protein translation	62	1	2.93	0.951
GO:0043604	amide biosynthetic process	584	20	27.58	0.953
GO:0043038	amino acid activation	63	1	2.98	0.953
GO:0043039	tRNA aminoacylation	63	1	2.98	0.953
GO:0019362	pyridine nucleotide metabolic process	101	2	4.77	0.955
GO:0046496	nicotinamide nucleotide metabolic process	101	2	4.77	0.955
GO:0044265	cellular macromolecule catabolic process	165	4	7.79	0.956
GO:0019439	aromatic compound catabolic process	66	1	3.12	0.959
GO:1901361	organic cyclic compound catabolic process	66	1	3.12	0.959
GO:0019637	organophosphate metabolic process	415	13	19.6	0.96
GO:0071704	organic substance metabolic process	6699	297	316.37	0.96
GO:0006733	oxidoreduction coenzyme metabolic process	106	2	5.01	0.964
GO:0051188	cofactor biosynthetic process	106	2	5.01	0.964
GO:0006412	translation	549	18	25.93	0.965
GO:0072524	pyridine-containing compound metabolic process	107	2	5.05	0.965
GO:0030163	protein catabolic process	175	4	8.26	0.968
GO:0034220	ion transmembrane transport	177	4	8.36	0.971
GO:0033036	macromolecule localization	432	13	20.4	0.973
GO:0009108	coenzyme biosynthetic process	75	1	3.54	0.974
GO:0098655	cation transmembrane transport	149	3	7.04	0.974
GO:0098660	inorganic ion transmembrane transport	149	3	7.04	0.974
GO:0098662	inorganic cation transmembrane transport	149	3	7.04	0.974
GO:0043603	cellular amide metabolic process	616	20	29.09	0.975
GO:0006807	nitrogen compound metabolic process	3138	129	148.19	0.975
GO:0034660	ncRNA metabolic process	151	3	7.13	0.976
GO:0051186	cofactor metabolic process	215	5	10.15	0.977
GO:0044237	cellular metabolic process	5747	249	271.41	0.977
GO:0051276	chromosome organization	120	2	5.67	0.98
GO:0044712	single-organism catabolic process	156	3	7.37	0.98
GO:0009057	macromolecule catabolic process	221	5	10.44	0.981
GO:0006629	lipid metabolic process	509	15	24.04	0.984
GO:1902582	single-organism intracellular transport	128	2	6.04	0.985
GO:0007049	cell cycle	87	1	4.11	0.985
GO:0044248	cellular catabolic process	261	6	12.33	0.986
GO:0008610	lipid biosynthetic process	231	5	10.91	0.986
GO:0007017	microtubule-based process	166	3	7.84	0.987
GO:0034622	cellular macromolecular complex assembly	132	2	6.23	0.988
GO:0006461	protein complex assembly	133	2	6.28	0.988
GO:0070271	protein complex biogenesis	133	2	6.28	0.988
GO:1901566	organonitrogen compound biosynthetic process	964	32	45.53	0.99
GO:0006732	coenzyme metabolic process	176	3	8.31	0.991
GO:0044255	cellular lipid metabolic process	309	7	14.59	0.992
GO:0043933	macromolecular complex subunit organization	214	4	10.11	0.992
GO:0006457	protein folding	184	3	8.69	0.993
GO:0065003	macromolecular complex assembly	148	2	6.99	0.994
GO:0016192	vesicle-mediated transport	225	4	10.63	0.995
GO:0065008	regulation of biological quality	192	3	9.07	0.995
GO:0071822	protein complex subunit organization	154	2	7.27	0.995
GO:0044085	cellular component biogenesis	263	5	12.42	0.995
GO:0009987	cellular process	7770	339	366.94	0.996
GO:0022607	cellular component assembly	195	3	9.21	0.996
GO:0016053	organic acid biosynthetic process	265	5	12.51	0.996
GO:0046394	carboxylic acid biosynthetic process	265	5	12.51	0.996
GO:0044711	single-organism biosynthetic process	726	21	34.29	0.996
GO:0006886	intracellular protein transport	274	5	12.94	0.997
GO:0044283	small molecule biosynthetic process	312	6	14.73	0.997
GO:1901564	organonitrogen compound metabolic process	1315	43	62.1	0.998
GO:0045454	cell redox homeostasis	129	1	6.09	0.998
GO:1901575	organic substance catabolic process	386	8	18.23	0.998
GO:0009056	catabolic process	389	8	18.37	0.998
GO:0016482	cytoplasmic transport	134	1	6.33	0.999
GO:1901607	alpha-amino acid biosynthetic process	134	1	6.33	0.999
GO:0034613	cellular protein localization	295	5	13.93	0.999
GO:0070727	cellular macromolecule localization	295	5	13.93	0.999
GO:0019725	cellular homeostasis	139	1	6.56	0.999
GO:0051649	establishment of localization in cell	401	8	18.94	0.999
GO:0015031	protein transport	342	6	16.15	0.999
GO:0006996	organelle organization	237	3	11.19	0.999
GO:0046907	intracellular transport	351	6	16.58	0.999
GO:0045184	establishment of protein localization	352	6	16.62	0.999
GO:0042592	homeostatic process	153	1	7.23	0.999
GO:0051641	cellular localization	424	8	20.02	0.999
GO:0044281	small molecule metabolic process	973	27	45.95	0.999
GO:0008652	cellular amino acid biosynthetic process	158	1	7.46	1
GO:0008104	protein localization	363	6	17.14	1
GO:0006520	cellular amino acid metabolic process	329	5	15.54	1
GO:0044763	single-organism cellular process	3394	126	160.28	1
GO:0043436	oxoacid metabolic process	586	12	27.67	1
GO:0006082	organic acid metabolic process	587	12	27.72	1
GO:1901605	alpha-amino acid metabolic process	193	1	9.11	1
GO:0019752	carboxylic acid metabolic process	578	11	27.3	1
GO:0008150	biological_process	11625	549	549	1
GO:0000041	transition metal ion transport	22	0	1.04	1
GO:0000079	regulation of cyclin-dependent protein serine/threonine kinase activity	14	0	0.66	1
GO:0000096	sulfur amino acid metabolic process	33	0	1.56	1
GO:0000097	sulfur amino acid biosynthetic process	27	0	1.28	1
GO:0000105	histidine biosynthetic process	13	0	0.61	1
GO:0000226	microtubule cytoskeleton organization	28	0	1.32	1
GO:0000272	polysaccharide catabolic process	12	0	0.57	1
GO:0000278	mitotic cell cycle	23	0	1.09	1
GO:0000280	nuclear division	19	0	0.9	1
GO:0000413	protein peptidyl-prolyl isomerization	43	0	2.03	1
GO:0000910	cytokinesis	22	0	1.04	1
GO:0001510	RNA methylation	13	0	0.61	1
GO:0001522	pseudouridine synthesis	22	0	1.04	1
GO:0001932	regulation of protein phosphorylation	15	0	0.71	1
GO:0005977	glycogen metabolic process	12	0	0.57	1
GO:0005978	glycogen biosynthetic process	12	0	0.57	1
GO:0006006	glucose metabolic process	22	0	1.04	1
GO:0006012	galactose metabolic process	11	0	0.52	1
GO:0006081	cellular aldehyde metabolic process	37	0	1.75	1
GO:0006098	pentose-phosphate shunt	22	0	1.04	1
GO:0006099	tricarboxylic acid cycle	21	0	0.99	1
GO:0006101	citrate metabolic process	21	0	0.99	1
GO:0006108	malate metabolic process	23	0	1.09	1
GO:0006112	energy reserve metabolic process	12	0	0.57	1
GO:0006122	mitochondrial electron transport, ubiquinol to cytochrome c	10	0	0.47	1
GO:0006188	IMP biosynthetic process	13	0	0.61	1
GO:0006206	pyrimidine nucleobase metabolic process	14	0	0.66	1
GO:0006207	'de novo' pyrimidine nucleobase biosynthetic process	12	0	0.57	1
GO:0006213	pyrimidine nucleoside metabolic process	14	0	0.66	1
GO:0006265	DNA topological change	13	0	0.61	1
GO:0006289	nucleotide-excision repair	16	0	0.76	1
GO:0006323	DNA packaging	40	0	1.89	1
GO:0006333	chromatin assembly or disassembly	40	0	1.89	1
GO:0006334	nucleosome assembly	38	0	1.79	1
GO:0006367	transcription initiation from RNA polymerase II promoter	16	0	0.76	1
GO:0006400	tRNA modification	21	0	0.99	1
GO:0006413	translational initiation	34	0	1.61	1
GO:0006415	translational termination	17	0	0.8	1
GO:0006417	regulation of translation	10	0	0.47	1
GO:0006465	signal peptide processing	12	0	0.57	1
GO:0006497	protein lipidation	19	0	0.9	1
GO:0006505	GPI anchor metabolic process	20	0	0.94	1
GO:0006506	GPI anchor biosynthetic process	17	0	0.8	1
GO:0006525	arginine metabolic process	12	0	0.57	1
GO:0006534	cysteine metabolic process	17	0	0.8	1
GO:0006535	cysteine biosynthetic process from serine	14	0	0.66	1
GO:0006541	glutamine metabolic process	14	0	0.66	1
GO:0006544	glycine metabolic process	19	0	0.9	1
GO:0006547	histidine metabolic process	13	0	0.61	1
GO:0006553	lysine metabolic process	16	0	0.76	1
GO:0006555	methionine metabolic process	14	0	0.66	1
GO:0006558	L-phenylalanine metabolic process	11	0	0.52	1
GO:0006563	L-serine metabolic process	31	0	1.46	1
GO:0006568	tryptophan metabolic process	17	0	0.8	1
GO:0006586	indolalkylamine metabolic process	17	0	0.8	1
GO:0006595	polyamine metabolic process	13	0	0.61	1
GO:0006596	polyamine biosynthetic process	10	0	0.47	1
GO:0006605	protein targeting	41	0	1.94	1
GO:0006606	protein import into nucleus	10	0	0.47	1
GO:0006612	protein targeting to membrane	17	0	0.8	1
GO:0006613	cotranslational protein targeting to membrane	17	0	0.8	1
GO:0006614	SRP-dependent cotranslational protein targeting to membrane	17	0	0.8	1
GO:0006643	membrane lipid metabolic process	38	0	1.79	1
GO:0006661	phosphatidylinositol biosynthetic process	18	0	0.85	1
GO:0006662	glycerol ether metabolic process	14	0	0.66	1
GO:0006664	glycolipid metabolic process	31	0	1.46	1
GO:0006665	sphingolipid metabolic process	11	0	0.52	1
GO:0006672	ceramide metabolic process	10	0	0.47	1
GO:0006721	terpenoid metabolic process	23	0	1.09	1
GO:0006739	NADP metabolic process	26	0	1.23	1
GO:0006760	folic acid-containing compound metabolic process	18	0	0.85	1
GO:0006801	superoxide metabolic process	18	0	0.85	1
GO:0006813	potassium ion transport	59	0	2.79	1
GO:0006814	sodium ion transport	11	0	0.52	1
GO:0006816	calcium ion transport	28	0	1.32	1
GO:0006821	chloride transport	11	0	0.52	1
GO:0006857	oligopeptide transport	15	0	0.71	1
GO:0006900	membrane budding	13	0	0.61	1
GO:0006901	vesicle coating	13	0	0.61	1
GO:0006904	vesicle docking involved in exocytosis	16	0	0.76	1
GO:0006913	nucleocytoplasmic transport	74	0	3.49	1
GO:0007005	mitochondrion organization	14	0	0.66	1
GO:0007015	actin filament organization	16	0	0.76	1
GO:0007034	vacuolar transport	19	0	0.9	1
GO:0007059	chromosome segregation	11	0	0.52	1
GO:0007067	mitotic nuclear division	14	0	0.66	1
GO:0008064	regulation of actin polymerization or depolymerization	14	0	0.66	1
GO:0008154	actin polymerization or depolymerization	16	0	0.76	1
GO:0008272	sulfate transport	18	0	0.85	1
GO:0008643	carbohydrate transport	11	0	0.52	1
GO:0008654	phospholipid biosynthetic process	46	0	2.17	1
GO:0009063	cellular amino acid catabolic process	24	0	1.13	1
GO:0009066	aspartate family amino acid metabolic process	38	0	1.79	1
GO:0009067	aspartate family amino acid biosynthetic process	34	0	1.61	1
GO:0009069	serine family amino acid metabolic process	44	0	2.08	1
GO:0009070	serine family amino acid biosynthetic process	25	0	1.18	1
GO:0009072	aromatic amino acid family metabolic process	48	0	2.27	1
GO:0009073	aromatic amino acid family biosynthetic process	29	0	1.37	1
GO:0009081	branched-chain amino acid metabolic process	16	0	0.76	1
GO:0009082	branched-chain amino acid biosynthetic process	13	0	0.61	1
GO:0009085	lysine biosynthetic process	16	0	0.76	1
GO:0009086	methionine biosynthetic process	12	0	0.57	1
GO:0009089	lysine biosynthetic process via diaminopimelate	16	0	0.76	1
GO:0009095	aromatic amino acid family biosynthetic process, prephenate pathway	10	0	0.47	1
GO:0009112	nucleobase metabolic process	23	0	1.09	1
GO:0009218	pyrimidine ribonucleotide metabolic process	12	0	0.57	1
GO:0009220	pyrimidine ribonucleotide biosynthetic process	12	0	0.57	1
GO:0009225	nucleotide-sugar metabolic process	11	0	0.52	1
GO:0009247	glycolipid biosynthetic process	24	0	1.13	1
GO:0009396	folic acid-containing compound biosynthetic process	15	0	0.71	1
GO:0009451	RNA modification	57	0	2.69	1
GO:0009698	phenylpropanoid metabolic process	30	0	1.42	1
GO:0009719	response to endogenous stimulus	46	0	2.17	1
GO:0009725	response to hormone	46	0	2.17	1
GO:0009767	photosynthetic electron transport chain	10	0	0.47	1
GO:0009808	lignin metabolic process	30	0	1.42	1
GO:0009890	negative regulation of biosynthetic process	13	0	0.61	1
GO:0009891	positive regulation of biosynthetic process	22	0	1.04	1
GO:0009892	negative regulation of metabolic process	35	0	1.65	1
GO:0009893	positive regulation of metabolic process	24	0	1.13	1
GO:0009894	regulation of catabolic process	11	0	0.52	1
GO:0010033	response to organic substance	46	0	2.17	1
GO:0010498	proteasomal protein catabolic process	11	0	0.52	1
GO:0010557	positive regulation of macromolecule biosynthetic process	22	0	1.04	1
GO:0010558	negative regulation of macromolecule biosynthetic process	13	0	0.61	1
GO:0010604	positive regulation of macromolecule metabolic process	22	0	1.04	1
GO:0010605	negative regulation of macromolecule metabolic process	35	0	1.65	1
GO:0010608	posttranscriptional regulation of gene expression	10	0	0.47	1
GO:0010628	positive regulation of gene expression	22	0	1.04	1
GO:0010629	negative regulation of gene expression	29	0	1.37	1
GO:0010638	positive regulation of organelle organization	11	0	0.52	1
GO:0015693	magnesium ion transport	15	0	0.71	1
GO:0015833	peptide transport	15	0	0.71	1
GO:0015936	coenzyme A metabolic process	12	0	0.57	1
GO:0016042	lipid catabolic process	22	0	1.04	1
GO:0016050	vesicle organization	14	0	0.66	1
GO:0016054	organic acid catabolic process	30	0	1.42	1
GO:0016114	terpenoid biosynthetic process	23	0	1.09	1
GO:0016226	iron-sulfur cluster assembly	24	0	1.13	1
GO:0016458	gene silencing	17	0	0.8	1
GO:0016485	protein processing	20	0	0.94	1
GO:0017038	protein import	19	0	0.9	1
GO:0018208	peptidyl-proline modification	43	0	2.03	1
GO:0018904	ether metabolic process	14	0	0.66	1
GO:0019220	regulation of phosphate metabolic process	16	0	0.76	1
GO:0019321	pentose metabolic process	10	0	0.47	1
GO:0019344	cysteine biosynthetic process	15	0	0.71	1
GO:0019359	nicotinamide nucleotide biosynthetic process	13	0	0.61	1
GO:0019363	pyridine nucleotide biosynthetic process	13	0	0.61	1
GO:0019674	NAD metabolic process	13	0	0.61	1
GO:0019682	glyceraldehyde-3-phosphate metabolic process	24	0	1.13	1
GO:0019856	pyrimidine nucleobase biosynthetic process	14	0	0.66	1
GO:0022402	cell cycle process	59	0	2.79	1
GO:0022406	membrane docking	18	0	0.85	1
GO:0022411	cellular component disassembly	24	0	1.13	1
GO:0022618	ribonucleoprotein complex assembly	14	0	0.66	1
GO:0030041	actin filament polymerization	14	0	0.66	1
GO:0030259	lipid glycosylation	11	0	0.52	1
GO:0030832	regulation of actin filament length	14	0	0.66	1
GO:0030833	regulation of actin filament polymerization	14	0	0.66	1
GO:0030838	positive regulation of actin filament polymerization	11	0	0.52	1
GO:0031047	gene silencing by RNA	17	0	0.8	1
GO:0031123	RNA 3'-end processing	11	0	0.52	1
GO:0031163	metallo-sulfur cluster assembly	24	0	1.13	1
GO:0031324	negative regulation of cellular metabolic process	18	0	0.85	1
GO:0031325	positive regulation of cellular metabolic process	23	0	1.09	1
GO:0031327	negative regulation of cellular biosynthetic process	13	0	0.61	1
GO:0031328	positive regulation of cellular biosynthetic process	22	0	1.04	1
GO:0031334	positive regulation of protein complex assembly	11	0	0.52	1
GO:0031347	regulation of defense response	10	0	0.47	1
GO:0031399	regulation of protein modification process	19	0	0.9	1
GO:0031497	chromatin assembly	38	0	1.79	1
GO:0032268	regulation of cellular protein metabolic process	29	0	1.37	1
GO:0032271	regulation of protein polymerization	14	0	0.66	1
GO:0032273	positive regulation of protein polymerization	11	0	0.52	1
GO:0032507	maintenance of protein location in cell	11	0	0.52	1
GO:0032535	regulation of cellular component size	16	0	0.76	1
GO:0032956	regulation of actin cytoskeleton organization	14	0	0.66	1
GO:0032970	regulation of actin filament-based process	14	0	0.66	1
GO:0032984	macromolecular complex disassembly	24	0	1.13	1
GO:0033043	regulation of organelle organization	20	0	0.94	1
GO:0033365	protein localization to organelle	45	0	2.13	1
GO:0034248	regulation of cellular amide metabolic process	10	0	0.47	1
GO:0034314	Arp2/3 complex-mediated actin nucleation	11	0	0.52	1
GO:0034504	protein localization to nucleus	10	0	0.47	1
GO:0034655	nucleobase-containing compound catabolic process	20	0	0.94	1
GO:0034728	nucleosome organization	38	0	1.79	1
GO:0042157	lipoprotein metabolic process	19	0	0.9	1
GO:0042158	lipoprotein biosynthetic process	19	0	0.9	1
GO:0042176	regulation of protein catabolic process	10	0	0.47	1
GO:0042180	cellular ketone metabolic process	14	0	0.66	1
GO:0042181	ketone biosynthetic process	10	0	0.47	1
GO:0042325	regulation of phosphorylation	15	0	0.71	1
GO:0042430	indole-containing compound metabolic process	17	0	0.8	1
GO:0042439	ethanolamine-containing compound metabolic process	12	0	0.57	1
GO:0042558	pteridine-containing compound metabolic process	20	0	0.94	1
GO:0042559	pteridine-containing compound biosynthetic process	17	0	0.8	1
GO:0042775	mitochondrial ATP synthesis coupled electron transport	11	0	0.52	1
GO:0042886	amide transport	15	0	0.71	1
GO:0043161	proteasome-mediated ubiquitin-dependent protein catabolic process	11	0	0.52	1
GO:0043241	protein complex disassembly	24	0	1.13	1
GO:0043254	regulation of protein complex assembly	14	0	0.66	1
GO:0043549	regulation of kinase activity	14	0	0.66	1
GO:0043624	cellular protein complex disassembly	22	0	1.04	1
GO:0044087	regulation of cellular component biogenesis	17	0	0.8	1
GO:0044089	positive regulation of cellular component biogenesis	11	0	0.52	1
GO:0044242	cellular lipid catabolic process	10	0	0.47	1
GO:0044282	small molecule catabolic process	36	0	1.7	1
GO:0044744	protein targeting to nucleus	10	0	0.47	1
GO:0044802	single-organism membrane organization	29	0	1.37	1
GO:0045010	actin nucleation	11	0	0.52	1
GO:0045017	glycerolipid biosynthetic process	35	0	1.65	1
GO:0045047	protein targeting to ER	17	0	0.8	1
GO:0045185	maintenance of protein location	11	0	0.52	1
GO:0045859	regulation of protein kinase activity	14	0	0.66	1
GO:0045893	positive regulation of transcription, DNA-templated	18	0	0.85	1
GO:0045934	negative regulation of nucleobase-containing compound metabolic process	12	0	0.57	1
GO:0045935	positive regulation of nucleobase-containing compound metabolic process	18	0	0.85	1
GO:0046040	IMP metabolic process	13	0	0.61	1
GO:0046112	nucleobase biosynthetic process	21	0	0.99	1
GO:0046131	pyrimidine ribonucleoside metabolic process	14	0	0.66	1
GO:0046132	pyrimidine ribonucleoside biosynthetic process	12	0	0.57	1
GO:0046134	pyrimidine nucleoside biosynthetic process	12	0	0.57	1
GO:0046271	phenylpropanoid catabolic process	30	0	1.42	1
GO:0046274	lignin catabolic process	30	0	1.42	1
GO:0046395	carboxylic acid catabolic process	30	0	1.42	1
GO:0046451	diaminopimelate metabolic process	16	0	0.76	1
GO:0046467	membrane lipid biosynthetic process	25	0	1.18	1
GO:0046470	phosphatidylcholine metabolic process	12	0	0.57	1
GO:0046474	glycerophospholipid biosynthetic process	25	0	1.18	1
GO:0046834	lipid phosphorylation	14	0	0.66	1
GO:0046854	phosphatidylinositol phosphorylation	14	0	0.66	1
GO:0048268	clathrin coat assembly	13	0	0.61	1
GO:0048278	vesicle docking	18	0	0.85	1
GO:0048285	organelle fission	25	0	1.18	1
GO:0048518	positive regulation of biological process	36	0	1.7	1
GO:0048519	negative regulation of biological process	45	0	2.13	1
GO:0048522	positive regulation of cellular process	35	0	1.65	1
GO:0048523	negative regulation of cellular process	28	0	1.32	1
GO:0048878	chemical homeostasis	10	0	0.47	1
GO:0050790	regulation of catalytic activity	23	0	1.09	1
GO:0050801	ion homeostasis	10	0	0.47	1
GO:0051052	regulation of DNA metabolic process	11	0	0.52	1
GO:0051128	regulation of cellular component organization	33	0	1.56	1
GO:0051130	positive regulation of cellular component organization	15	0	0.71	1
GO:0051156	glucose 6-phosphate metabolic process	22	0	1.04	1
GO:0051169	nuclear transport	74	0	3.49	1
GO:0051170	nuclear import	10	0	0.47	1
GO:0051172	negative regulation of nitrogen compound metabolic process	15	0	0.71	1
GO:0051173	positive regulation of nitrogen compound metabolic process	22	0	1.04	1
GO:0051174	regulation of phosphorus metabolic process	16	0	0.76	1
GO:0051205	protein insertion into membrane	10	0	0.47	1
GO:0051220	cytoplasmic sequestering of protein	11	0	0.52	1
GO:0051235	maintenance of location	11	0	0.52	1
GO:0051246	regulation of protein metabolic process	36	0	1.7	1
GO:0051254	positive regulation of RNA metabolic process	18	0	0.85	1
GO:0051301	cell division	29	0	1.37	1
GO:0051338	regulation of transferase activity	17	0	0.8	1
GO:0051493	regulation of cytoskeleton organization	14	0	0.66	1
GO:0051495	positive regulation of cytoskeleton organization	11	0	0.52	1
GO:0051604	protein maturation	20	0	0.94	1
GO:0051651	maintenance of location in cell	11	0	0.52	1
GO:0051726	regulation of cell cycle	30	0	1.42	1
GO:0052803	imidazole-containing compound metabolic process	13	0	0.61	1
GO:0055080	cation homeostasis	10	0	0.47	1
GO:0061024	membrane organization	42	0	1.98	1
GO:0065004	protein-DNA complex assembly	40	0	1.89	1
GO:0065009	regulation of molecular function	25	0	1.18	1
GO:0070588	calcium ion transmembrane transport	19	0	0.9	1
GO:0070838	divalent metal ion transport	52	0	2.46	1
GO:0070887	cellular response to chemical stimulus	12	0	0.57	1
GO:0070925	organelle assembly	15	0	0.71	1
GO:0070972	protein localization to endoplasmic reticulum	25	0	1.18	1
GO:0071103	DNA conformation change	53	0	2.5	1
GO:0071804	cellular potassium ion transport	39	0	1.84	1
GO:0071805	potassium ion transmembrane transport	39	0	1.84	1
GO:0071824	protein-DNA complex subunit organization	40	0	1.89	1
GO:0071826	ribonucleoprotein complex subunit organization	14	0	0.66	1
GO:0071900	regulation of protein serine/threonine kinase activity	14	0	0.66	1
GO:0072348	sulfur compound transport	18	0	0.85	1
GO:0072511	divalent inorganic cation transport	52	0	2.46	1
GO:0072525	pyridine-containing compound biosynthetic process	19	0	0.9	1
GO:0072593	reactive oxygen species metabolic process	20	0	0.94	1
GO:0072594	establishment of protein localization to organelle	36	0	1.7	1
GO:0072599	establishment of protein localization to endoplasmic reticulum	17	0	0.8	1
GO:0072657	protein localization to membrane	28	0	1.32	1
GO:0080134	regulation of response to stress	11	0	0.52	1
GO:0090066	regulation of anatomical structure size	16	0	0.76	1
GO:0090150	establishment of protein localization to membrane	28	0	1.32	1
GO:0097164	ammonium ion metabolic process	19	0	0.9	1
GO:0098771	inorganic ion homeostasis	10	0	0.47	1
GO:0098813	nuclear chromosome segregation	11	0	0.52	1
GO:1901606	alpha-amino acid catabolic process	20	0	0.94	1
GO:1901617	organic hydroxy compound biosynthetic process	12	0	0.57	1
GO:1901661	quinone metabolic process	10	0	0.47	1
GO:1901663	quinone biosynthetic process	10	0	0.47	1
GO:1902221	erythrose 4-phosphate/phosphoenolpyruvate family amino acid metabolic process	11	0	0.52	1
GO:1902580	single-organism cellular localization	48	0	2.27	1
GO:1902593	single-organism nuclear import	10	0	0.47	1
GO:1902680	positive regulation of RNA biosynthetic process	18	0	0.85	1
GO:1903047	mitotic cell cycle process	23	0	1.09	1
GO:1903508	positive regulation of nucleic acid-templated transcription	18	0	0.85	1
GO:1903509	liposaccharide metabolic process	31	0	1.46	1
GO:1904029	regulation of cyclin-dependent protein kinase activity	14	0	0.66	1
GO:2000113	negative regulation of cellular macromolecule biosynthetic process	13	0	0.61	1

## Sheet: Zero Qst GO enrichment
GO.ID	Term	Annotated	Significant	Expected	p.value
GO:0043038	amino acid activation	63	34	21.78	0.0012
GO:0043039	tRNA aminoacylation	63	34	21.78	0.0012
GO:0006418	tRNA aminoacylation for protein translation	62	33	21.43	0.0019
GO:0051726	regulation of cell cycle	30	17	10.37	0.0107
GO:0034660	ncRNA metabolic process	151	66	52.2	0.0119
GO:0006413	translational initiation	34	18	11.75	0.021
GO:0071840	cellular component organization or biogenesis	573	221	198.1	0.0224
GO:0043436	oxoacid metabolic process	586	225	202.59	0.0261
GO:0019752	carboxylic acid metabolic process	578	222	199.83	0.0266
GO:0006082	organic acid metabolic process	587	225	202.94	0.0281
GO:0044085	cellular component biogenesis	263	106	90.92	0.029
GO:0045454	cell redox homeostasis	129	55	44.6	0.034
GO:0016043	cellular component organization	505	194	174.59	0.0359
GO:0042592	homeostatic process	153	64	52.9	0.0361
GO:0007059	chromosome segregation	11	7	3.8	0.0469
GO:0080134	regulation of response to stress	11	7	3.8	0.0469
GO:0098813	nuclear chromosome segregation	11	7	3.8	0.0469
GO:0022607	cellular component assembly	195	79	67.42	0.0474
GO:0032502	developmental process	27	14	9.33	0.0484
GO:0044767	single-organism developmental process	27	14	9.33	0.0484
GO:0048285	organelle fission	25	13	8.64	0.0549
GO:0006835	dicarboxylic acid transport	18	10	6.22	0.055
GO:0015740	C4-dicarboxylate transport	18	10	6.22	0.055
GO:0015743	malate transport	18	10	6.22	0.055
GO:0070838	divalent metal ion transport	52	24	17.98	0.0553
GO:0072511	divalent inorganic cation transport	52	24	17.98	0.0553
GO:0032787	monocarboxylic acid metabolic process	194	78	67.07	0.0573
GO:0000278	mitotic cell cycle	23	12	7.95	0.0624
GO:1903047	mitotic cell cycle process	23	12	7.95	0.0624
GO:0019725	cellular homeostasis	139	57	48.06	0.0662
GO:0048523	negative regulation of cellular process	28	14	9.68	0.0667
GO:0044270	cellular nitrogen compound catabolic process	31	15	10.72	0.0785
GO:0046700	heterocycle catabolic process	31	15	10.72	0.0785
GO:0006298	mismatch repair	12	7	4.15	0.0796
GO:0006536	glutamate metabolic process	12	7	4.15	0.0796
GO:0000280	nuclear division	19	10	6.57	0.081
GO:0071554	cell wall organization or biogenesis	138	56	47.71	0.0815
GO:0022402	cell cycle process	59	26	20.4	0.0823
GO:0065008	regulation of biological quality	192	76	66.38	0.0824
GO:0016226	iron-sulfur cluster assembly	24	12	8.3	0.0866
GO:0031163	metallo-sulfur cluster assembly	24	12	8.3	0.0866
GO:0006399	tRNA metabolic process	120	49	41.49	0.0891
GO:0031347	regulation of defense response	10	6	3.46	0.0899
GO:0042176	regulation of protein catabolic process	10	6	3.46	0.0899
GO:0051338	regulation of transferase activity	17	9	5.88	0.0927
GO:0072330	monocarboxylic acid biosynthetic process	107	44	36.99	0.093
GO:0016482	cytoplasmic transport	134	54	46.33	0.096
GO:0044255	cellular lipid metabolic process	309	118	106.83	0.0985
GO:0019684	photosynthesis, light reaction	22	11	7.61	0.099
GO:0009664	plant-type cell wall organization	42	19	14.52	0.0994
GO:0071669	plant-type cell wall organization or biogenesis	42	19	14.52	0.0994
GO:0006364	rRNA processing	37	17	12.79	0.1011
GO:0016072	rRNA metabolic process	37	17	12.79	0.1011
GO:0006633	fatty acid biosynthetic process	97	40	33.53	0.1015
GO:0006520	cellular amino acid metabolic process	329	125	113.74	0.1035
GO:0016311	dephosphorylation	116	47	40.1	0.1056
GO:0045229	external encapsulating structure organization	116	47	40.1	0.1056
GO:0071555	cell wall organization	116	47	40.1	0.1056
GO:0006857	oligopeptide transport	15	8	5.19	0.1063
GO:0015693	magnesium ion transport	15	8	5.19	0.1063
GO:0015833	peptide transport	15	8	5.19	0.1063
GO:0042886	amide transport	15	8	5.19	0.1063
GO:0044765	single-organism transport	1238	448	428	0.1091
GO:1902578	single-organism localization	1261	456	435.95	0.1104
GO:0007049	cell cycle	87	36	30.08	0.1108
GO:0034655	nucleobase-containing compound catabolic process	20	10	6.91	0.1134
GO:0006778	porphyrin-containing compound metabolic process	35	16	12.1	0.1143
GO:0006470	protein dephosphorylation	85	35	29.39	0.1216
GO:0006188	IMP biosynthetic process	13	7	4.49	0.1223
GO:0009082	branched-chain amino acid biosynthetic process	13	7	4.49	0.1223
GO:0019359	nicotinamide nucleotide biosynthetic process	13	7	4.49	0.1223
GO:0019363	pyridine nucleotide biosynthetic process	13	7	4.49	0.1223
GO:0019674	NAD metabolic process	13	7	4.49	0.1223
GO:0046040	IMP metabolic process	13	7	4.49	0.1223
GO:1901565	organonitrogen compound catabolic process	56	24	19.36	0.1226
GO:0005975	carbohydrate metabolic process	831	303	287.29	0.1251
GO:0050790	regulation of catalytic activity	23	11	7.95	0.1325
GO:0008654	phospholipid biosynthetic process	46	20	15.9	0.1326
GO:0006644	phospholipid metabolic process	118	47	40.8	0.1339
GO:0006511	ubiquitin-dependent protein catabolic process	129	51	44.6	0.1363
GO:0019941	modification-dependent protein catabolic process	129	51	44.6	0.1363
GO:0043632	modification-dependent macromolecule catabolic process	129	51	44.6	0.1363
GO:0009064	glutamine family amino acid metabolic process	41	18	14.17	0.1375
GO:0008643	carbohydrate transport	11	6	3.8	0.1414
GO:0009894	regulation of catabolic process	11	6	3.8	0.1414
GO:0010498	proteasomal protein catabolic process	11	6	3.8	0.1414
GO:0043161	proteasome-mediated ubiquitin-dependent protein catabolic process	11	6	3.8	0.1414
GO:0008610	lipid biosynthetic process	231	88	79.86	0.1431
GO:0006631	fatty acid metabolic process	108	43	37.34	0.1472
GO:0009081	branched-chain amino acid metabolic process	16	8	5.53	0.1504
GO:0006855	drug transmembrane transport	60	25	20.74	0.1534
GO:0015893	drug transport	60	25	20.74	0.1534
GO:0042493	response to drug	60	25	20.74	0.1534
GO:0006810	transport	1784	636	616.77	0.1554
GO:0009057	macromolecule catabolic process	221	84	76.4	0.1555
GO:0051179	localization	1807	644	624.72	0.156
GO:0051234	establishment of localization	1794	639	620.22	0.1619
GO:0006779	porphyrin-containing compound biosynthetic process	29	13	10.03	0.1663
GO:0006888	ER to Golgi vesicle-mediated transport	24	11	8.3	0.1713
GO:0015988	energy coupled proton transmembrane transport, against electrochemical gradient	37	16	12.79	0.1736
GO:0015991	ATP hydrolysis coupled proton transport	37	16	12.79	0.1736
GO:0090662	ATP hydrolysis coupled transmembrane transport	37	16	12.79	0.1736
GO:0000079	regulation of cyclin-dependent protein serine/threonine kinase activity	14	7	4.84	0.1743
GO:0006535	cysteine biosynthetic process from serine	14	7	4.84	0.1743
GO:0007005	mitochondrion organization	14	7	4.84	0.1743
GO:0007067	mitotic nuclear division	14	7	4.84	0.1743
GO:0016998	cell wall macromolecule catabolic process	14	7	4.84	0.1743
GO:0043549	regulation of kinase activity	14	7	4.84	0.1743
GO:0044036	cell wall macromolecule metabolic process	14	7	4.84	0.1743
GO:0045859	regulation of protein kinase activity	14	7	4.84	0.1743
GO:0071900	regulation of protein serine/threonine kinase activity	14	7	4.84	0.1743
GO:1904029	regulation of cyclin-dependent protein kinase activity	14	7	4.84	0.1743
GO:0031399	regulation of protein modification process	19	9	6.57	0.1747
GO:0072525	pyridine-containing compound biosynthetic process	19	9	6.57	0.1747
GO:0006629	lipid metabolic process	509	186	175.97	0.1817
GO:0006508	proteolysis	560	204	193.6	0.1835
GO:0051186	cofactor metabolic process	215	81	74.33	0.1855
GO:0006950	response to stress	425	156	146.93	0.1864
GO:0015849	organic acid transport	51	21	17.63	0.1975
GO:0046942	carboxylic acid transport	51	21	17.63	0.1975
GO:0006534	cysteine metabolic process	17	8	5.88	0.2017
GO:0006461	protein complex assembly	133	51	45.98	0.2029
GO:0070271	protein complex biogenesis	133	51	45.98	0.2029
GO:0005977	glycogen metabolic process	12	6	4.15	0.2033
GO:0005978	glycogen biosynthetic process	12	6	4.15	0.2033
GO:0006112	energy reserve metabolic process	12	6	4.15	0.2033
GO:0006525	arginine metabolic process	12	6	4.15	0.2033
GO:0048856	anatomical structure development	12	6	4.15	0.2033
GO:0048583	regulation of response to stimulus	92	36	31.81	0.2071
GO:1902582	single-organism intracellular transport	128	49	44.25	0.2127
GO:0042254	ribosome biogenesis	65	26	22.47	0.2128
GO:0006733	oxidoreduction coenzyme metabolic process	106	41	36.65	0.2135
GO:0065009	regulation of molecular function	25	11	8.64	0.2149
GO:0070972	protein localization to endoplasmic reticulum	25	11	8.64	0.2149
GO:0090304	nucleic acid metabolic process	1817	643	628.17	0.2206
GO:0019362	pyridine nucleotide metabolic process	101	39	34.92	0.2245
GO:0046496	nicotinamide nucleotide metabolic process	101	39	34.92	0.2245
GO:0051246	regulation of protein metabolic process	36	15	12.45	0.233
GO:0001932	regulation of protein phosphorylation	15	7	5.19	0.2339
GO:0019344	cysteine biosynthetic process	15	7	5.19	0.2339
GO:0042325	regulation of phosphorylation	15	7	5.19	0.2339
GO:0072524	pyridine-containing compound metabolic process	107	41	36.99	0.2354
GO:0022613	ribonucleoprotein complex biogenesis	74	29	25.58	0.2355
GO:0001101	response to acid chemical	10	5	3.46	0.2391
GO:0009767	photosynthetic electron transport chain	10	5	3.46	0.2391
GO:0071705	nitrogen compound transport	77	30	26.62	0.2425
GO:0030001	metal ion transport	267	98	92.31	0.2485
GO:0044699	single-organism process	5184	1810	1792.21	0.2488
GO:0005985	sucrose metabolic process	18	8	6.22	0.2587
GO:0031324	negative regulation of cellular metabolic process	18	8	6.22	0.2587
GO:0030163	protein catabolic process	175	65	60.5	0.2595
GO:0044281	small molecule metabolic process	973	346	336.39	0.2599
GO:0006952	defense response	64	25	22.13	0.2632
GO:0009100	glycoprotein metabolic process	64	25	22.13	0.2632
GO:0009101	glycoprotein biosynthetic process	64	25	22.13	0.2632
GO:0048519	negative regulation of biological process	45	18	15.56	0.2678
GO:1901615	organic hydroxy compound metabolic process	45	18	15.56	0.2678
GO:0000105	histidine biosynthetic process	13	6	4.49	0.2728
GO:0006547	histidine metabolic process	13	6	4.49	0.2728
GO:0006595	polyamine metabolic process	13	6	4.49	0.2728
GO:0052803	imidazole-containing compound metabolic process	13	6	4.49	0.2728
GO:1901264	carbohydrate derivative transport	13	6	4.49	0.2728
GO:0006081	cellular aldehyde metabolic process	37	15	12.79	0.2735
GO:0016070	RNA metabolic process	1571	554	543.13	0.2766
GO:0072350	tricarboxylic acid metabolic process	29	12	10.03	0.278
GO:0006090	pyruvate metabolic process	70	27	24.2	0.2783
GO:0006486	protein glycosylation	59	23	20.4	0.279
GO:0043413	macromolecule glycosylation	59	23	20.4	0.279
GO:0065003	macromolecular complex assembly	148	55	51.17	0.2791
GO:0007275	multicellular organism development	21	9	7.26	0.2796
GO:0044707	single-multicellular organism process	21	9	7.26	0.2796
GO:0046839	phospholipid dephosphorylation	21	9	7.26	0.2796
GO:0046856	phosphatidylinositol dephosphorylation	21	9	7.26	0.2796
GO:0006259	DNA metabolic process	255	93	88.16	0.2802
GO:0006333	chromatin assembly or disassembly	40	16	13.83	0.2851
GO:0071822	protein complex subunit organization	154	57	53.24	0.2872
GO:0006139	nucleobase-containing compound metabolic process	2166	760	748.83	0.2961
GO:0006022	aminoglycan metabolic process	24	10	8.3	0.2974
GO:0019682	glyceraldehyde-3-phosphate metabolic process	24	10	8.3	0.2974
GO:0006261	DNA-dependent DNA replication	16	7	5.53	0.2988
GO:0019220	regulation of phosphate metabolic process	16	7	5.53	0.2988
GO:0051174	regulation of phosphorus metabolic process	16	7	5.53	0.2988
GO:0009451	RNA modification	57	22	19.71	0.3047
GO:0033013	tetrapyrrole metabolic process	46	18	15.9	0.3059
GO:0006913	nucleocytoplasmic transport	74	28	25.58	0.3159
GO:0042545	cell wall modification	74	28	25.58	0.3159
GO:0046488	phosphatidylinositol metabolic process	74	28	25.58	0.3159
GO:0051169	nuclear transport	74	28	25.58	0.3159
GO:0006334	nucleosome assembly	38	15	13.14	0.3161
GO:0031497	chromatin assembly	38	15	13.14	0.3161
GO:0034728	nucleosome organization	38	15	13.14	0.3161
GO:0046486	glycerolipid metabolic process	102	38	35.26	0.3172
GO:0006026	aminoglycan catabolic process	19	8	6.57	0.3199
GO:0006030	chitin metabolic process	19	8	6.57	0.3199
GO:0006032	chitin catabolic process	19	8	6.57	0.3199
GO:0006497	protein lipidation	19	8	6.57	0.3199
GO:0042157	lipoprotein metabolic process	19	8	6.57	0.3199
GO:0042158	lipoprotein biosynthetic process	19	8	6.57	0.3199
GO:0046348	amino sugar catabolic process	19	8	6.57	0.3199
GO:0070588	calcium ion transmembrane transport	19	8	6.57	0.3199
GO:1901071	glucosamine-containing compound metabolic process	19	8	6.57	0.3199
GO:1901072	glucosamine-containing compound catabolic process	19	8	6.57	0.3199
GO:0006012	galactose metabolic process	11	5	3.8	0.3205
GO:0006814	sodium ion transport	11	5	3.8	0.3205
GO:0051052	regulation of DNA metabolic process	11	5	3.8	0.3205
GO:0006605	protein targeting	41	16	14.17	0.3267
GO:0030243	cellulose metabolic process	41	16	14.17	0.3267
GO:0030244	cellulose biosynthetic process	41	16	14.17	0.3267
GO:1901361	organic cyclic compound catabolic process	66	25	22.82	0.3274
GO:1901575	organic substance catabolic process	386	138	133.45	0.3281
GO:0009056	catabolic process	389	139	134.49	0.3302
GO:0044248	cellular catabolic process	261	94	90.23	0.3317
GO:0006720	isoprenoid metabolic process	55	21	19.01	0.3323
GO:0008299	isoprenoid biosynthetic process	55	21	19.01	0.3323
GO:0006325	chromatin organization	83	31	28.69	0.3345
GO:0001522	pseudouridine synthesis	22	9	7.61	0.3374
GO:0065007	biological regulation	1905	667	658.6	0.338
GO:0044265	cellular macromolecule catabolic process	165	60	57.04	0.3403
GO:0080090	regulation of primary metabolic process	1152	405	398.27	0.3413
GO:0051276	chromosome organization	120	44	41.49	0.3459
GO:0006749	glutathione metabolic process	14	6	4.84	0.3466
GO:0046834	lipid phosphorylation	14	6	4.84	0.3466
GO:0046854	phosphatidylinositol phosphorylation	14	6	4.84	0.3466
GO:0042221	response to chemical	123	45	42.52	0.3502
GO:0006790	sulfur compound metabolic process	92	34	31.81	0.3512
GO:0006820	anion transport	126	46	43.56	0.3545
GO:0043933	macromolecular complex subunit organization	214	77	73.98	0.3553
GO:0046907	intracellular transport	351	125	121.35	0.3579
GO:0055085	transmembrane transport	772	272	266.9	0.3581
GO:0050789	regulation of biological process	1862	651	643.73	0.3589
GO:0071103	DNA conformation change	53	20	18.32	0.3619
GO:0031323	regulation of cellular metabolic process	1149	403	397.23	0.3645
GO:0006816	calcium ion transport	28	11	9.68	0.3655
GO:0019222	regulation of metabolic process	1178	413	407.26	0.3665
GO:0006506	GPI anchor biosynthetic process	17	7	5.88	0.3668
GO:0006612	protein targeting to membrane	17	7	5.88	0.3668
GO:0006613	cotranslational protein targeting to membrane	17	7	5.88	0.3668
GO:0006614	SRP-dependent cotranslational protein targeting to membrane	17	7	5.88	0.3668
GO:0010035	response to inorganic substance	17	7	5.88	0.3668
GO:0045047	protein targeting to ER	17	7	5.88	0.3668
GO:0072599	establishment of protein localization to endoplasmic reticulum	17	7	5.88	0.3668
GO:0032501	multicellular organismal process	118	43	40.8	0.3668
GO:0006563	L-serine metabolic process	31	12	10.72	0.3771
GO:1901136	carbohydrate derivative catabolic process	31	12	10.72	0.3771
GO:0051649	establishment of localization in cell	401	142	138.63	0.378
GO:0033365	protein localization to organelle	45	17	15.56	0.3782
GO:0051641	cellular localization	424	150	146.59	0.3792
GO:0044763	single-organism cellular process	3394	1181	1173.38	0.3796
GO:0000003	reproduction	110	40	38.03	0.3801
GO:0022414	reproductive process	110	40	38.03	0.3801
GO:0006040	amino sugar metabolic process	20	8	6.91	0.3832
GO:0006505	GPI anchor metabolic process	20	8	6.91	0.3832
GO:0009966	regulation of signal transduction	79	29	27.31	0.3848
GO:0010646	regulation of cell communication	79	29	27.31	0.3848
GO:0023051	regulation of signaling	79	29	27.31	0.3848
GO:0060255	regulation of macromolecule metabolic process	1169	409	404.15	0.3879
GO:0006974	cellular response to DNA damage stimulus	136	49	47.02	0.3909
GO:0006732	coenzyme metabolic process	176	63	60.85	0.3931
GO:0050794	regulation of cellular process	1815	633	627.48	0.3931
GO:0044703	multi-organism reproductive process	102	37	35.26	0.3943
GO:0019219	regulation of nucleobase-containing compound metabolic process	1118	391	386.52	0.3951
GO:0006066	alcohol metabolic process	37	14	12.79	0.3969
GO:0009112	nucleobase metabolic process	23	9	7.95	0.3969
GO:0009832	plant-type cell wall biogenesis	12	5	4.15	0.4042
GO:0010215	cellulose microfibril organization	12	5	4.15	0.4042
GO:0016049	cell growth	12	5	4.15	0.4042
GO:0030198	extracellular matrix organization	12	5	4.15	0.4042
GO:0040007	growth	12	5	4.15	0.4042
GO:0043062	extracellular structure organization	12	5	4.15	0.4042
GO:0045934	negative regulation of nucleobase-containing compound metabolic process	12	5	4.15	0.4042
GO:0070726	cell wall assembly	12	5	4.15	0.4042
GO:0071668	plant-type cell wall assembly	12	5	4.15	0.4042
GO:1901617	organic hydroxy compound biosynthetic process	12	5	4.15	0.4042
GO:0006323	DNA packaging	40	15	13.83	0.4054
GO:0033014	tetrapyrrole biosynthetic process	40	15	13.83	0.4054
GO:0065004	protein-DNA complex assembly	40	15	13.83	0.4054
GO:0071824	protein-DNA complex subunit organization	40	15	13.83	0.4054
GO:0006818	hydrogen transport	74	27	25.58	0.4066
GO:0015992	proton transport	74	27	25.58	0.4066
GO:0006281	DNA repair	134	48	46.33	0.4118
GO:0032774	RNA biosynthetic process	1241	433	429.04	0.4126
GO:0000413	protein peptidyl-prolyl isomerization	43	16	14.87	0.4133
GO:0018208	peptidyl-proline modification	43	16	14.87	0.4133
GO:0006310	DNA recombination	29	11	10.03	0.419
GO:0032268	regulation of cellular protein metabolic process	29	11	10.03	0.419
GO:0051301	cell division	29	11	10.03	0.419
GO:0051172	negative regulation of nitrogen compound metabolic process	15	6	5.19	0.4217
GO:0044702	single organism reproductive process	103	37	35.61	0.4225
GO:0006355	regulation of transcription, DNA-templated	1104	385	381.68	0.4244
GO:1903506	regulation of nucleic acid-templated transcription	1104	385	381.68	0.4244
GO:2001141	regulation of RNA biosynthetic process	1104	385	381.68	0.4244
GO:0006096	glycolytic process	66	24	22.82	0.4247
GO:0006757	ATP generation from ADP	66	24	22.82	0.4247
GO:0009135	purine nucleoside diphosphate metabolic process	66	24	22.82	0.4247
GO:0009179	purine ribonucleoside diphosphate metabolic process	66	24	22.82	0.4247
GO:0009185	ribonucleoside diphosphate metabolic process	66	24	22.82	0.4247
GO:0015711	organic anion transport	66	24	22.82	0.4247
GO:0019439	aromatic compound catabolic process	66	24	22.82	0.4247
GO:0046031	ADP metabolic process	66	24	22.82	0.4247
GO:0051252	regulation of RNA metabolic process	1107	386	382.71	0.4255
GO:0051188	cofactor biosynthetic process	106	38	36.65	0.4266
GO:0046483	heterocycle metabolic process	2325	808	803.8	0.4279
GO:0034470	ncRNA processing	89	32	30.77	0.4308
GO:0051171	regulation of nitrogen compound metabolic process	1128	393	389.97	0.4328
GO:0006650	glycerophospholipid metabolic process	92	33	31.81	0.4351
GO:0006661	phosphatidylinositol biosynthetic process	18	7	6.22	0.4356
GO:0006839	mitochondrial transport	18	7	6.22	0.4356
GO:0045017	glycerolipid biosynthetic process	35	13	12.1	0.4364
GO:0006457	protein folding	184	65	63.61	0.4419
GO:0071702	organic substance transport	492	172	170.09	0.4441
GO:0006351	transcription, DNA-templated	1239	431	428.35	0.4449
GO:0097659	nucleic acid-templated transcription	1239	431	428.35	0.4449
GO:0044710	single-organism metabolic process	2946	1022	1018.49	0.4459
GO:0006099	tricarboxylic acid cycle	21	8	7.26	0.4469
GO:0006101	citrate metabolic process	21	8	7.26	0.4469
GO:0016053	organic acid biosynthetic process	265	93	91.62	0.4515
GO:0046394	carboxylic acid biosynthetic process	265	93	91.62	0.4515
GO:0044257	cellular protein catabolic process	150	53	51.86	0.4525
GO:0051603	proteolysis involved in cellular protein catabolic process	150	53	51.86	0.4525
GO:0006811	ion transport	559	195	193.26	0.4533
GO:0051704	multi-organism process	107	38	36.99	0.4547
GO:0044272	sulfur compound biosynthetic process	64	23	22.13	0.4555
GO:0009063	cellular amino acid catabolic process	24	9	8.3	0.4566
GO:0006575	cellular modified amino acid metabolic process	47	17	16.25	0.463
GO:0048193	Golgi vesicle transport	47	17	16.25	0.463
GO:0051258	protein polymerization	47	17	16.25	0.463
GO:0033554	cellular response to stress	139	49	48.06	0.4646
GO:0009889	regulation of biosynthetic process	1120	389	387.21	0.4649
GO:0010556	regulation of macromolecule biosynthetic process	1120	389	387.21	0.4649
GO:0031326	regulation of cellular biosynthetic process	1120	389	387.21	0.4649
GO:2000112	regulation of cellular macromolecule biosynthetic process	1120	389	387.21	0.4649
GO:0009084	glutamine family amino acid biosynthetic process	27	10	9.33	0.465
GO:0006996	organelle organization	237	83	81.94	0.4663
GO:0016054	organic acid catabolic process	30	11	10.37	0.4724
GO:0046395	carboxylic acid catabolic process	30	11	10.37	0.4724
GO:0006596	polyamine biosynthetic process	10	4	3.46	0.4745
GO:0048878	chemical homeostasis	10	4	3.46	0.4745
GO:0050801	ion homeostasis	10	4	3.46	0.4745
GO:0055080	cation homeostasis	10	4	3.46	0.4745
GO:0098771	inorganic ion homeostasis	10	4	3.46	0.4745
GO:0034654	nucleobase-containing compound biosynthetic process	1390	482	480.55	0.4763
GO:0000096	sulfur amino acid metabolic process	33	12	11.41	0.4791
GO:0006813	potassium ion transport	59	21	20.4	0.4832
GO:0072594	establishment of protein localization to organelle	36	13	12.45	0.4852
GO:0006265	DNA topological change	13	5	4.49	0.4863
GO:0009890	negative regulation of biosynthetic process	13	5	4.49	0.4863
GO:0010558	negative regulation of macromolecule biosynthetic process	13	5	4.49	0.4863
GO:0031327	negative regulation of cellular biosynthetic process	13	5	4.49	0.4863
GO:2000113	negative regulation of cellular macromolecule biosynthetic process	13	5	4.49	0.4863
GO:0006289	nucleotide-excision repair	16	6	5.53	0.4955
GO:0019637	organophosphate metabolic process	415	144	143.47	0.4969
GO:0008037	cell recognition	97	34	33.53	0.4986
GO:0009856	pollination	97	34	33.53	0.4986
GO:0009875	pollen-pistil interaction	97	34	33.53	0.4986
GO:0044706	multi-multicellular organism process	97	34	33.53	0.4986
GO:0048544	recognition of pollen	97	34	33.53	0.4986
GO:0006725	cellular aromatic compound metabolic process	2353	814	813.48	0.499
GO:0000271	polysaccharide biosynthetic process	71	25	24.55	0.4995
GO:0009250	glucan biosynthetic process	71	25	24.55	0.4995
GO:0033692	cellular polysaccharide biosynthetic process	71	25	24.55	0.4995
GO:0042440	pigment metabolic process	45	16	15.56	0.5007
GO:0019751	polyol metabolic process	19	7	6.57	0.503
GO:0097164	ammonium ion metabolic process	19	7	6.57	0.503
GO:0006260	DNA replication	74	26	25.58	0.5031
GO:1902580	single-organism cellular localization	48	17	16.59	0.5052
GO:0034622	cellular macromolecular complex assembly	132	46	45.64	0.5062
GO:0015672	monovalent inorganic cation transport	161	56	55.66	0.5074
GO:0006098	pentose-phosphate shunt	22	8	7.61	0.5095
GO:0051156	glucose 6-phosphate metabolic process	22	8	7.61	0.5095
GO:0010468	regulation of gene expression	1131	391	391.01	0.5123
GO:0046467	membrane lipid biosynthetic process	25	9	8.64	0.5152
GO:0072657	protein localization to membrane	28	10	9.68	0.5203
GO:0090150	establishment of protein localization to membrane	28	10	9.68	0.5203
GO:0006812	cation transport	420	145	145.2	0.5273
GO:0050896	response to stimulus	1049	362	362.66	0.5303
GO:0016568	chromatin modification	43	15	14.87	0.5402
GO:0030258	lipid modification	52	18	17.98	0.5496
GO:0043648	dicarboxylic acid metabolic process	55	19	19.01	0.5524
GO:0006869	lipid transport	64	22	22.13	0.5603
GO:0010876	lipid localization	64	22	22.13	0.5603
GO:0006665	sphingolipid metabolic process	11	4	3.8	0.5626
GO:0032507	maintenance of protein location in cell	11	4	3.8	0.5626
GO:0045185	maintenance of protein location	11	4	3.8	0.5626
GO:0051220	cytoplasmic sequestering of protein	11	4	3.8	0.5626
GO:0051235	maintenance of location	11	4	3.8	0.5626
GO:0051651	maintenance of location in cell	11	4	3.8	0.5626
GO:0006541	glutamine metabolic process	14	5	4.84	0.564
GO:0015995	chlorophyll biosynthetic process	14	5	4.84	0.564
GO:0070085	glycosylation	70	24	24.2	0.5651
GO:0015994	chlorophyll metabolic process	17	6	5.88	0.5657
GO:0098655	cation transmembrane transport	149	51	51.51	0.5663
GO:0098660	inorganic ion transmembrane transport	149	51	51.51	0.5663
GO:0098662	inorganic cation transmembrane transport	149	51	51.51	0.5663
GO:0033043	regulation of organelle organization	20	7	6.91	0.5676
GO:0042546	cell wall biogenesis	20	7	6.91	0.5676
GO:0006108	malate metabolic process	23	8	7.95	0.5696
GO:0006721	terpenoid metabolic process	23	8	7.95	0.5696
GO:0016114	terpenoid biosynthetic process	23	8	7.95	0.5696
GO:0006739	NADP metabolic process	26	9	8.99	0.5716
GO:0043623	cellular protein complex assembly	79	27	27.31	0.5717
GO:0006221	pyrimidine nucleotide biosynthetic process	29	10	10.03	0.5735
GO:0009628	response to abiotic stimulus	29	10	10.03	0.5735
GO:0044802	single-organism membrane organization	29	10	10.03	0.5735
GO:0042398	cellular modified amino acid biosynthetic process	32	11	11.06	0.5755
GO:0000160	phosphorelay signal transduction system	85	29	29.39	0.5759
GO:0009892	negative regulation of metabolic process	35	12	12.1	0.5775
GO:0010605	negative regulation of macromolecule metabolic process	35	12	12.1	0.5775
GO:0006643	membrane lipid metabolic process	38	13	13.14	0.5794
GO:0032940	secretion by cell	50	17	17.29	0.5868
GO:0046903	secretion	50	17	17.29	0.5868
GO:1902600	hydrogen ion transmembrane transport	65	22	22.47	0.5953
GO:0044724	single-organism carbohydrate catabolic process	71	24	24.55	0.5985
GO:0034220	ion transmembrane transport	177	60	61.19	0.6034
GO:1901360	organic cyclic compound metabolic process	2395	823	828	0.6041
GO:0016052	carbohydrate catabolic process	83	28	28.69	0.6047
GO:0006886	intracellular protein transport	274	93	94.73	0.6104
GO:0019438	aromatic compound biosynthetic process	1506	516	520.65	0.6169
GO:0034613	cellular protein localization	295	100	101.99	0.619
GO:0070727	cellular macromolecule localization	295	100	101.99	0.619
GO:1902589	single-organism organelle organization	116	39	40.1	0.62
GO:0018130	heterocycle biosynthetic process	1530	524	528.95	0.6227
GO:0055086	nucleobase-containing small molecule metabolic process	307	104	106.14	0.6237
GO:0046148	pigment biosynthetic process	39	13	13.48	0.6237
GO:0071804	cellular potassium ion transport	39	13	13.48	0.6237
GO:0071805	potassium ion transmembrane transport	39	13	13.48	0.6237
GO:0051128	regulation of cellular component organization	33	11	11.41	0.6237
GO:0061024	membrane organization	42	14	14.52	0.624
GO:0015698	inorganic anion transport	45	15	15.56	0.6244
GO:0000097	sulfur amino acid biosynthetic process	27	9	9.33	0.6248
GO:0009060	aerobic respiration	27	9	9.33	0.6248
GO:0009247	glycolipid biosynthetic process	24	8	8.3	0.626
GO:0090407	organophosphate biosynthetic process	184	62	63.61	0.6266
GO:0046112	nucleobase biosynthetic process	21	7	7.26	0.6279
GO:0055114	oxidation-reduction process	1496	512	517.2	0.6292
GO:0008272	sulfate transport	18	6	6.22	0.6308
GO:0072348	sulfur compound transport	18	6	6.22	0.6308
GO:0009108	coenzyme biosynthetic process	75	25	25.93	0.6318
GO:0070925	organelle assembly	15	5	5.19	0.6351
GO:0000272	polysaccharide catabolic process	12	4	4.15	0.6418
GO:0009611	response to wounding	12	4	4.15	0.6418
GO:0042439	ethanolamine-containing compound metabolic process	12	4	4.15	0.6418
GO:0046470	phosphatidylcholine metabolic process	12	4	4.15	0.6418
GO:0044283	small molecule biosynthetic process	312	105	107.86	0.6558
GO:0006165	nucleoside diphosphate phosphorylation	73	24	25.24	0.6621
GO:0046939	nucleotide phosphorylation	73	24	25.24	0.6621
GO:0051273	beta-glucan metabolic process	52	17	17.98	0.6623
GO:0051274	beta-glucan biosynthetic process	52	17	17.98	0.6623
GO:0018193	peptidyl-amino acid modification	79	26	27.31	0.6627
GO:0005984	disaccharide metabolic process	43	14	14.87	0.6644
GO:0006220	pyrimidine nucleotide metabolic process	31	10	10.72	0.6713
GO:0006664	glycolipid metabolic process	31	10	10.72	0.6713
GO:1903509	liposaccharide metabolic process	31	10	10.72	0.6713
GO:0003333	amino acid transmembrane transport	28	9	9.68	0.6744
GO:0006865	amino acid transport	28	9	9.68	0.6744
GO:0098656	anion transmembrane transport	28	9	9.68	0.6744
GO:1903825	organic acid transmembrane transport	28	9	9.68	0.6744
GO:0016192	vesicle-mediated transport	225	75	77.79	0.6771
GO:0009070	serine family amino acid biosynthetic process	25	8	8.64	0.6782
GO:0046474	glycerophospholipid biosynthetic process	25	8	8.64	0.6782
GO:0000041	transition metal ion transport	22	7	7.61	0.6832
GO:0007034	vacuolar transport	19	6	6.57	0.6897
GO:0017038	protein import	19	6	6.57	0.6897
GO:0018022	peptidyl-lysine methylation	19	6	6.57	0.6897
GO:0006367	transcription initiation from RNA polymerase II promoter	16	5	5.53	0.6985
GO:0006904	vesicle docking involved in exocytosis	16	5	5.53	0.6985
GO:0009266	response to temperature stimulus	16	5	5.53	0.6985
GO:0009408	response to heat	16	5	5.53	0.6985
GO:0035556	intracellular signal transduction	253	84	87.47	0.7003
GO:0006887	exocytosis	47	15	16.25	0.7003
GO:0009069	serine family amino acid metabolic process	44	14	15.21	0.7024
GO:1901135	carbohydrate derivative metabolic process	386	129	133.45	0.7036
GO:0016569	covalent chromatin modification	38	12	13.14	0.7075
GO:0016570	histone modification	38	12	13.14	0.7075
GO:0001510	RNA methylation	13	4	4.49	0.7109
GO:0006900	membrane budding	13	4	4.49	0.7109
GO:0006901	vesicle coating	13	4	4.49	0.7109
GO:0009605	response to external stimulus	13	4	4.49	0.7109
GO:0048268	clathrin coat assembly	13	4	4.49	0.7109
GO:0005976	polysaccharide metabolic process	114	37	39.41	0.7154
GO:0006073	cellular glucan metabolic process	102	33	35.26	0.7158
GO:0044042	glucan metabolic process	102	33	35.26	0.7158
GO:0044264	cellular polysaccharide metabolic process	102	33	35.26	0.7158
GO:0044723	single-organism carbohydrate metabolic process	325	108	112.36	0.716
GO:0044262	cellular carbohydrate metabolic process	165	54	57.04	0.7186
GO:0010629	negative regulation of gene expression	29	9	10.03	0.7197
GO:1901137	carbohydrate derivative biosynthetic process	189	62	65.34	0.7214
GO:0043412	macromolecule modification	1871	636	646.84	0.726
GO:0044711	single-organism biosynthetic process	726	244	250.99	0.7263
GO:0006672	ceramide metabolic process	10	3	3.46	0.7291
GO:0019321	pentose metabolic process	10	3	3.46	0.7291
GO:0042181	ketone biosynthetic process	10	3	3.46	0.7291
GO:0044242	cellular lipid catabolic process	10	3	3.46	0.7291
GO:0051205	protein insertion into membrane	10	3	3.46	0.7291
GO:1901661	quinone metabolic process	10	3	3.46	0.7291
GO:1901663	quinone biosynthetic process	10	3	3.46	0.7291
GO:1901362	organic cyclic compound biosynthetic process	1566	531	541.4	0.7328
GO:0009311	oligosaccharide metabolic process	48	15	16.59	0.7346
GO:0072527	pyrimidine-containing compound metabolic process	48	15	16.59	0.7346
GO:0072521	purine-containing compound metabolic process	211	69	72.95	0.7406
GO:0042558	pteridine-containing compound metabolic process	20	6	6.91	0.7421
GO:0043094	cellular metabolic compound salvage	20	6	6.91	0.7421
GO:1901606	alpha-amino acid catabolic process	20	6	6.91	0.7421
GO:0006396	RNA processing	235	77	81.24	0.7432
GO:0009117	nucleotide metabolic process	262	86	90.58	0.7465
GO:0009132	nucleoside diphosphate metabolic process	76	24	26.27	0.7467
GO:0044282	small molecule catabolic process	36	11	12.45	0.7493
GO:0033865	nucleoside bisphosphate metabolic process	17	5	5.88	0.7539
GO:0033875	ribonucleoside bisphosphate metabolic process	17	5	5.88	0.7539
GO:0034032	purine nucleoside bisphosphate metabolic process	17	5	5.88	0.7539
GO:0042559	pteridine-containing compound biosynthetic process	17	5	5.88	0.7539
GO:1901700	response to oxygen-containing compound	17	5	5.88	0.7539
GO:0016567	protein ubiquitination	122	39	42.18	0.7576
GO:0009607	response to biotic stimulus	27	8	9.33	0.768
GO:0006206	pyrimidine nucleobase metabolic process	14	4	4.84	0.7696
GO:0006213	pyrimidine nucleoside metabolic process	14	4	4.84	0.7696
GO:0006662	glycerol ether metabolic process	14	4	4.84	0.7696
GO:0016050	vesicle organization	14	4	4.84	0.7696
GO:0018904	ether metabolic process	14	4	4.84	0.7696
GO:0019856	pyrimidine nucleobase biosynthetic process	14	4	4.84	0.7696
GO:0022618	ribonucleoprotein complex assembly	14	4	4.84	0.7696
GO:0042180	cellular ketone metabolic process	14	4	4.84	0.7696
GO:0046131	pyrimidine ribonucleoside metabolic process	14	4	4.84	0.7696
GO:0071826	ribonucleoprotein complex subunit organization	14	4	4.84	0.7696
GO:0009126	purine nucleoside monophosphate metabolic process	159	51	54.97	0.7723
GO:0009167	purine ribonucleoside monophosphate metabolic process	159	51	54.97	0.7723
GO:0044712	single-organism catabolic process	156	50	53.93	0.7726
GO:0009308	amine metabolic process	74	23	25.58	0.7735
GO:0006753	nucleoside phosphate metabolic process	267	87	92.31	0.7743
GO:0070647	protein modification by small protein conjugation or removal	129	41	44.6	0.776
GO:0022411	cellular component disassembly	24	7	8.3	0.7769
GO:0032984	macromolecular complex disassembly	24	7	8.3	0.7769
GO:0043241	protein complex disassembly	24	7	8.3	0.7769
GO:0009127	purine nucleoside monophosphate biosynthetic process	62	19	21.43	0.7823
GO:0009168	purine ribonucleoside monophosphate biosynthetic process	62	19	21.43	0.7823
GO:0006464	cellular protein modification process	1808	611	625.06	0.7831
GO:0036211	protein modification process	1808	611	625.06	0.7831
GO:0034637	cellular carbohydrate biosynthetic process	99	31	34.23	0.7842
GO:0015074	DNA integration	21	6	7.26	0.7877
GO:0009123	nucleoside monophosphate metabolic process	169	54	58.43	0.7881
GO:0033036	macromolecule localization	432	142	149.35	0.7904
GO:0006558	L-phenylalanine metabolic process	11	3	3.8	0.7916
GO:0006821	chloride transport	11	3	3.8	0.7916
GO:1902221	erythrose 4-phosphate/phosphoenolpyruvate family amino acid metabolic process	11	3	3.8	0.7916
GO:0032446	protein modification by small protein conjugation	127	40	43.91	0.7949
GO:0009124	nucleoside monophosphate biosynthetic process	72	22	24.89	0.7993
GO:0006760	folic acid-containing compound metabolic process	18	5	6.22	0.8012
GO:0016571	histone methylation	18	5	6.22	0.8012
GO:0022406	membrane docking	18	5	6.22	0.8012
GO:0034968	histone lysine methylation	18	5	6.22	0.8012
GO:0045893	positive regulation of transcription, DNA-templated	18	5	6.22	0.8012
GO:0045935	positive regulation of nucleobase-containing compound metabolic process	18	5	6.22	0.8012
GO:0048278	vesicle docking	18	5	6.22	0.8012
GO:0051254	positive regulation of RNA metabolic process	18	5	6.22	0.8012
GO:1902680	positive regulation of RNA biosynthetic process	18	5	6.22	0.8012
GO:1903508	positive regulation of nucleic acid-templated transcription	18	5	6.22	0.8012
GO:0009161	ribonucleoside monophosphate metabolic process	167	53	57.74	0.8039
GO:0072528	pyrimidine-containing compound biosynthetic process	44	13	15.21	0.8042
GO:0009165	nucleotide biosynthetic process	125	39	43.22	0.8131
GO:1901293	nucleoside phosphate biosynthetic process	125	39	43.22	0.8131
GO:0006091	generation of precursor metabolites and energy	177	56	61.19	0.8173
GO:0009396	folic acid-containing compound biosynthetic process	15	4	5.19	0.8185
GO:0009156	ribonucleoside monophosphate biosynthetic process	70	21	24.2	0.8241
GO:0006366	transcription from RNA polymerase II promoter	48	14	16.59	0.8262
GO:0000910	cytokinesis	22	6	7.61	0.8269
GO:0009891	positive regulation of biosynthetic process	22	6	7.61	0.8269
GO:0010557	positive regulation of macromolecule biosynthetic process	22	6	7.61	0.8269
GO:0010604	positive regulation of macromolecule metabolic process	22	6	7.61	0.8269
GO:0010628	positive regulation of gene expression	22	6	7.61	0.8269
GO:0031328	positive regulation of cellular biosynthetic process	22	6	7.61	0.8269
GO:0043624	cellular protein complex disassembly	22	6	7.61	0.8269
GO:0051173	positive regulation of nitrogen compound metabolic process	22	6	7.61	0.8269
GO:0016051	carbohydrate biosynthetic process	108	33	37.34	0.8372
GO:0006544	glycine metabolic process	19	5	6.57	0.841
GO:0015748	organophosphate ester transport	19	5	6.57	0.841
GO:0007154	cell communication	619	203	214	0.8411
GO:0043414	macromolecule methylation	55	16	19.01	0.8411
GO:0006207	'de novo' pyrimidine nucleobase biosynthetic process	12	3	4.15	0.8416
GO:0015936	coenzyme A metabolic process	12	3	4.15	0.8416
GO:0008652	cellular amino acid biosynthetic process	158	49	54.62	0.849
GO:0006796	phosphate-containing compound metabolic process	1930	648	667.24	0.8496
GO:0019318	hexose metabolic process	49	14	16.94	0.8502
GO:0019693	ribose phosphate metabolic process	210	66	72.6	0.8509
GO:0009719	response to endogenous stimulus	46	13	15.9	0.8553
GO:0009725	response to hormone	46	13	15.9	0.8553
GO:0010033	response to organic substance	46	13	15.9	0.8553
GO:0007264	small GTPase mediated signal transduction	134	41	46.33	0.8568
GO:0051716	cellular response to stimulus	657	215	227.14	0.8572
GO:0019748	secondary metabolic process	33	9	11.41	0.8576
GO:0006793	phosphorus metabolic process	1932	648	667.93	0.8578
GO:0005996	monosaccharide metabolic process	59	17	20.4	0.8582
GO:0006553	lysine metabolic process	16	4	5.53	0.8586
GO:0006771	riboflavin metabolic process	16	4	5.53	0.8586
GO:0007015	actin filament organization	16	4	5.53	0.8586
GO:0008154	actin polymerization or depolymerization	16	4	5.53	0.8586
GO:0009085	lysine biosynthetic process	16	4	5.53	0.8586
GO:0009089	lysine biosynthetic process via diaminopimelate	16	4	5.53	0.8586
GO:0009231	riboflavin biosynthetic process	16	4	5.53	0.8586
GO:0042726	flavin-containing compound metabolic process	16	4	5.53	0.8586
GO:0042727	flavin-containing compound biosynthetic process	16	4	5.53	0.8586
GO:0046451	diaminopimelate metabolic process	16	4	5.53	0.8586
GO:0031325	positive regulation of cellular metabolic process	23	6	7.95	0.8601
GO:0009698	phenylpropanoid metabolic process	30	8	10.37	0.8664
GO:0009808	lignin metabolic process	30	8	10.37	0.8664
GO:0046271	phenylpropanoid catabolic process	30	8	10.37	0.8664
GO:0046274	lignin catabolic process	30	8	10.37	0.8664
GO:0008104	protein localization	363	116	125.5	0.8691
GO:0015031	protein transport	342	109	118.24	0.8698
GO:0006163	purine nucleotide metabolic process	194	60	67.07	0.876
GO:0009119	ribonucleoside metabolic process	188	58	65	0.8773
GO:0009259	ribonucleotide metabolic process	188	58	65	0.8773
[truncated: 178 more rows]
